# Supplementary material for: Co-fractionation–mass spectrometry to characterize native mitochondrial protein assemblies in mammalian neurons and brain
Source: Springer Nature journal article supplement (doi:10.1038/s41596-023-00901-z), 2023-11-20
Supplement: MOESM2 [file 41596_2023_901_MOESM2_ESM21.xlsx]

## Sheet: README
Supplementary Table 1 | High-quality mt protein interactions predicted in mouse brain
Column header	Remarks
Uniprot ID for mitochondrial interactor A	Uniprot ID for mt interactor A
Uniprot ID for mitochondrial interactor B	Uniprot ID for mt interactor B
Protein name for mitocondrial interactor A	Protein name for mt interactor A
Protein name for mitochondrial interactor B	Gene name for mt interactor B
PPI score from ensemble classifier	Ensemble of supervised machine learning classifiers (Random Forest, Generalized Linear Model, Support Vector Machine) that generates a probability score for each predicted mtPPIs.
Mitochondrial or submitochondrial localization	Localization information is obtained mouse MitoCarta. IMM, inner mitochondrial membrane; OMM, outer mitochondrial membrane; IMS, intermembrane space; Unknown or Membrane, localized to mitochondria but the subcellular mitochondrial compartment is undefined.
Supplementary Table 2 | Mt protein complexes derived from protein interactions in mouse brain
Column header	Remarks
Mitochondrial complex identifier	Mitochondrial complexes identified through two-stage (ClusterONE, MCL) clustering of high-confidence mitochondrial protein-protein interaction network.
Co-complex mitochondrial membership represented with unique UniProt identifier	List of all mitochondrial proteins associated with a predicted complex.
Adjusted P-value for hypergeometric test	P-value adjusted using the Benjamini-Hochberg correction procedure.
Average matching index	Overlap with respect to size of both annotated and predicted complexes.
Mitochondrial complex status	Annotated with new subunits' refers to predicted mt complex overlapping with known complex (i.e., from CORUM, Gene Ontology cellular component, and Reactome) but with some new mitochondrial subunit members; 'Novel' refers to mitochondrial complex not previously reported; and 'Annotated' refers to predicted mitochondrial complex with near matching to known complex subunits.
Supplementary Table 3 | Mt subunits of putative protein complexes enriched for GO annotations, human disorders, and phenotypic aberrations in human disease
Column header	Remarks
Mitochondrial complex identifier	Mitochondrial complexes identified through two-stage (ClusterONE, MCL) clustering of high-confidence mitochondrial protein-protein interaction network.
GO/Human disorders/Phenotypic abnormalities in human disease	Enrichment of mitochondrial complex subunits for Gene Ontology terms, human disorders, and phenotypic anomalies found in human disease.
Data source	Gene Ontology (GO) annotations from biological process (BP), cellular component (CC) and molecular function (MF); Phenotypic abnormalities found in human disease from human phenotype ontology (HPO); and Gene-disease associations from Disease Gene Network (DisGeNET) genetic disorder database.
Adjusted P-value for hypergeometric test	P-value adjusted using the Benjamini-Hochberg correction procedure.
Enrichment	Mitochondrial subunits of the predicted complexes enriched for GO annotations, human disorders, and phenotypic aberrations in human disease.

## Sheet: Supplementary Data 1
Supplementary Data 1 | High-quality mt protein interactions predicted in mouse brain
Uniprot ID for mitochondrial interactor A	Uniprot ID for mitochondrial interactor B	Protein name for mitocondrial interactor A	Protein name for mitochondrial interactor B	PPI score from ensemble classifier	Mitochondrial or submitochondrial localization
A2APY7	O35129	Ndufaf5	Phb2	0.810554	IMM~IMM
A2APY7	O35459	Ndufaf5	Ech1	0.689313	IMM~Matrix
A2APY7	O70337	Ndufaf5	Bik	0.664614	IMM~OMM
A2APY7	O88845	Ndufaf5	Akap10	0.71663	IMM~OMM
A2APY7	P20108	Ndufaf5	Prdx3	0.724083	IMM~Matrix
A2APY7	P29758	Ndufaf5	Oat	0.657793	IMM~Matrix
A2APY7	P34914	Ndufaf5	Ephx2	0.662798	IMM~Unknown
A2APY7	P35486	Ndufaf5	Pdha1	0.642473	IMM~Matrix
A2APY7	P41216	Ndufaf5	Acsl1	0.827844	IMM~OMM
A2APY7	P50544	Ndufaf5	Acadvl	0.717083	IMM~IMM
A2APY7	P51881	Ndufaf5	Slc25a5	0.720295	IMM~IMM
A2APY7	P52503	Ndufaf5	Ndufs6	0.752323	IMM~IMM
A2APY7	P56135	Ndufaf5	Atp5j2	0.748721	IMM~IMM
A2APY7	P56382	Ndufaf5	Atp5e	0.770967	IMM~IMM
A2APY7	P56391	Ndufaf5	Cox6b1	0.648158	IMM~IMM
A2APY7	P58281	Ndufaf5	Opa1	0.767033	IMM~IMM
A2APY7	P59017	Ndufaf5	Bcl2l13	0.773468	IMM~OMM
A2APY7	P67778	Ndufaf5	Phb	0.695375	IMM~IMM
A2APY7	P97478	Ndufaf5	Coq7	0.768739	IMM~IMM
A2APY7	P99028	Ndufaf5	Uqcrh	0.871976	IMM~IMM
A2APY7	Q06185	Ndufaf5	Atp5k	0.714825	IMM~IMM
A2APY7	Q3UHB1	Ndufaf5	Nt5dc3	0.802011	IMM~Matrix
A2APY7	Q4VAE3	Ndufaf5	Tmem65	0.788061	IMM~IMM
A2APY7	Q5SUC9	Ndufaf5	Sco1	0.827225	IMM~IMM
A2APY7	Q5SWU9	Ndufaf5	Acaca	0.795612	IMM~Matrix
A2APY7	Q60597	Ndufaf5	Ogdh	0.691483	IMM~Matrix
A2APY7	Q60759	Ndufaf5	Gcdh	0.668554	IMM~Matrix
A2APY7	Q60931	Ndufaf5	Vdac3	0.819519	IMM~OMM
A2APY7	Q62425	Ndufaf5	Ndufa4	0.846026	IMM~IMM
A2APY7	Q6PB66	Ndufaf5	Lrpprc	0.826009	IMM~Matrix
A2APY7	Q78IK2	Ndufaf5	Atp5md	0.775999	IMM~IMM
A2APY7	Q78PY7	Ndufaf5	Snd1	0.741689	IMM~Unknown
A2APY7	Q7TMF3	Ndufaf5	Ndufa12	0.799285	IMM~IMM
A2APY7	Q80SW1	Ndufaf5	Ahcyl1	0.824332	IMM~OMM
A2APY7	Q80V03	Ndufaf5	Adck5	0.763215	IMM~Unknown
A2APY7	Q8BFR5	Ndufaf5	Tufm	0.802233	IMM~Matrix
A2APY7	Q8BH59	Ndufaf5	Slc25a12	0.717123	IMM~IMM
A2APY7	Q8BH86	Ndufaf5	Dglucy	0.852444	IMM~Matrix
A2APY7	Q8BKZ9	Ndufaf5	Pdhx	0.77675	IMM~Matrix
A2APY7	Q8BMF4	Ndufaf5	Dlat	0.730634	IMM~Matrix
A2APY7	Q8BW75	Ndufaf5	Maob	0.729269	IMM~OMM
A2APY7	Q8CC21	Ndufaf5	Ttc19	0.781688	IMM~IMM
A2APY7	Q8CGK3	Ndufaf5	Lonp1	0.812789	IMM~Matrix
A2APY7	Q8JZN5	Ndufaf5	Acad9	0.882304	IMM~IMM
A2APY7	Q8K1R3	Ndufaf5	Pnpt1	0.700119	IMM~Matrix|IMS
A2APY7	Q8K1Z0	Ndufaf5	Coq9	0.852202	IMM~IMM
A2APY7	Q8K2B3	Ndufaf5	Sdha	0.689608	IMM~IMM
A2APY7	Q8K3J1	Ndufaf5	Ndufs8	0.877489	IMM~IMM
A2APY7	Q8R1I1	Ndufaf5	Uqcr10	0.700419	IMM~IMM
A2APY7	Q8R3J4	Ndufaf5	Mterf3	0.717323	IMM~Matrix
A2APY7	Q8VCX5	Ndufaf5	Micu1	0.748116	IMM~IMM
A2APY7	Q91V61	Ndufaf5	Sfxn3	0.859606	IMM~IMM
A2APY7	Q91WC3	Ndufaf5	Acsl6	0.876401	IMM~OMM
A2APY7	Q91WD5	Ndufaf5	Ndufs2	0.791899	IMM~IMM
A2APY7	Q91WS0	Ndufaf5	Cisd1	0.650581	IMM~OMM
A2APY7	Q91YT0	Ndufaf5	Ndufv1	0.721922	IMM~IMM
A2APY7	Q99JR1	Ndufaf5	Sfxn1	0.711557	IMM~IMM
A2APY7	Q99JY0	Ndufaf5	Hadhb	0.664212	IMM~IMM
A2APY7	Q99LC3	Ndufaf5	Ndufa10	0.660915	IMM~IMM
A2APY7	Q99LY9	Ndufaf5	Ndufs5	0.755076	IMM~IMM
A2APY7	Q99N92	Ndufaf5	Mrpl27	0.771694	IMM~Matrix
A2APY7	Q9CPP6	Ndufaf5	Ndufa5	0.837267	IMM~IMM
A2APY7	Q9CPQ8	Ndufaf5	Atp5l	0.717651	IMM~IMM
A2APY7	Q9CPX8	Ndufaf5	Uqcr11	0.673468	IMM~IMM
A2APY7	Q9CQ75	Ndufaf5	Ndufa2	0.836379	IMM~IMM
A2APY7	Q9CQ85	Ndufaf5	Timm22	0.745962	IMM~IMM
A2APY7	Q9CQA3	Ndufaf5	Sdhb	0.792379	IMM~IMM
A2APY7	Q9CQC7	Ndufaf5	Ndufb4	0.738538	IMM~IMM
A2APY7	Q9CQN1	Ndufaf5	Trap1	0.83569	IMM~Matrix
A2APY7	Q9CQX8	Ndufaf5	Mrps36	0.7011	IMM~Matrix
A2APY7	Q9CQZ5	Ndufaf5	Ndufa6	0.686641	IMM~IMM
A2APY7	Q9CRA5	Ndufaf5	Golph3	0.705536	IMM~IMS
A2APY7	Q9CRD0	Ndufaf5	Ociad1	0.677619	IMM~OMM
A2APY7	Q9CX83	Ndufaf5	Armcx1	0.769236	IMM~OMM
A2APY7	Q9CXZ1	Ndufaf5	Ndufs4	0.675827	IMM~IMM
A2APY7	Q9CYH2	Ndufaf5	Prxl2a	0.671219	IMM~Membrane
A2APY7	Q9CZ13	Ndufaf5	Uqcrc1	0.640229	IMM~IMM
A2APY7	Q9CZW5	Ndufaf5	Tomm70a	0.833102	IMM~OMM
A2APY7	Q9D0M3	Ndufaf5	Cyc1	0.827908	IMM~IMM
A2APY7	Q9D6J6	Ndufaf5	Ndufv2	0.810282	IMM~IMM
A2APY7	Q9D6M3	Ndufaf5	Slc25a22	0.655232	IMM~IMM
A2APY7	Q9D799	Ndufaf5	Mtfmt	0.686721	IMM~Matrix
A2APY7	Q9D7B6	Ndufaf5	Acad8	0.664655	IMM~Matrix
A2APY7	Q9D880	Ndufaf5	Timm50	0.846391	IMM~IMM
A2APY7	Q9DB41	Ndufaf5	Slc25a18	0.663793	IMM~IMM
A2APY7	Q9DB77	Ndufaf5	Uqcrc2	0.64081	IMM~IMM
A2APY7	Q9DC69	Ndufaf5	Ndufa9	0.805446	IMM~IMM
A2APY7	Q9DC70	Ndufaf5	Ndufs7	0.773445	IMM~IMM
A2APY7	Q9DCC8	Ndufaf5	Tomm20	0.728482	IMM~OMM
A2APY7	Q9DCJ5	Ndufaf5	Ndufa8	0.706837	IMM~IMM
A2APY7	Q9DCN2	Ndufaf5	Cyb5r3	0.662244	IMM~OMM
A2APY7	Q9DCS3	Ndufaf5	Mecr	0.714888	IMM~Matrix
A2APY7	Q9DCT2	Ndufaf5	Ndufs3	0.812519	IMM~IMM
A2APY7	Q9DCV6	Ndufaf5	Dele1	0.724507	IMM~IMM
A2APY7	Q9DCZ4	Ndufaf5	Apoo	0.694921	IMM~IMM
A2APY7	Q9EQ20	Ndufaf5	Aldh6a1	0.698588	IMM~IMM
A2APY7	Q9WV96	Ndufaf5	Timm10b	0.654936	IMM~IMM
A2APY7	Q9WV98	Ndufaf5	Timm9	0.689413	IMM~IMM
A2APY7	Q9Z0X1	Ndufaf5	Aifm1	0.677055	IMM~IMM
A2APY7	Q9Z1P6	Ndufaf5	Ndufa7	0.776126	IMM~IMM
A2ATU0	O88587	Dhtkd1	Comt	0.827669	Matrix~Membrane
A2ATU0	P00158	Dhtkd1	mt-Cytb	0.725251	Matrix~IMM
A2ATU0	P28352	Dhtkd1	Apex1	0.713697	Matrix~Matrix
A2ATU0	P35487	Dhtkd1	Pdha2	0.816781	Matrix~Matrix
A2ATU0	P38060	Dhtkd1	Hmgcl	0.693167	Matrix~Matrix
A2ATU0	P48771	Dhtkd1	Cox7a2	0.756327	Matrix~IMM
A2ATU0	P52196	Dhtkd1	Tst	0.678413	Matrix~Matrix
A2ATU0	P52825	Dhtkd1	Cpt2	0.674833	Matrix~IMM
A2ATU0	P56135	Dhtkd1	Atp5j2	0.756352	Matrix~IMM
A2ATU0	P58044	Dhtkd1	Idi1	0.64648	Matrix~Matrix
A2ATU0	P62075	Dhtkd1	Timm13	0.64859	Matrix~IMM
A2ATU0	P63030	Dhtkd1	Mpc1	0.747306	Matrix~IMM
A2ATU0	P84084	Dhtkd1	Arf5	0.796196	Matrix~Unknown
A2ATU0	P97478	Dhtkd1	Coq7	0.772232	Matrix~IMM
A2ATU0	P97823	Dhtkd1	Lypla1	0.700274	Matrix~Unknown
A2ATU0	Q3UIU2	Dhtkd1	Ndufb6	0.724739	Matrix~IMM
A2ATU0	Q3ULD5	Dhtkd1	Mccc2	0.761289	Matrix~Matrix
A2ATU0	Q3V132	Dhtkd1	Slc25a31	0.841978	Matrix~IMM
A2ATU0	Q61387	Dhtkd1	Cox7a2l	0.745157	Matrix~IMM
A2ATU0	Q61578	Dhtkd1	Fdxr	0.725922	Matrix~Matrix
A2ATU0	Q62425	Dhtkd1	Ndufa4	0.648571	Matrix~IMM
A2ATU0	Q64445	Dhtkd1	Cox8a	0.681603	Matrix~IMM
A2ATU0	Q64520	Dhtkd1	Guk1	0.643263	Matrix~Matrix
A2ATU0	Q64521	Dhtkd1	Gpd2	0.672782	Matrix~IMM
A2ATU0	Q6P8J7	Dhtkd1	Ckmt2	0.692317	Matrix~IMM
A2ATU0	Q78IK2	Dhtkd1	Atp5md	0.80892	Matrix~IMM
A2ATU0	Q7TMF3	Dhtkd1	Ndufa12	0.711195	Matrix~IMM
A2ATU0	Q7TMV3	Dhtkd1	Fastkd5	0.789959	Matrix~Matrix
A2ATU0	Q7TNE1	Dhtkd1	Sugct	0.818795	Matrix~Matrix
A2ATU0	Q7TSQ8	Dhtkd1	Pdpr	0.673573	Matrix~Matrix
A2ATU0	Q80UN9	Dhtkd1	Trit1	0.763204	Matrix~Matrix
A2ATU0	Q80V03	Dhtkd1	Adck5	0.750711	Matrix~Unknown
A2ATU0	Q80X85	Dhtkd1	Mrps7	0.643105	Matrix~Matrix
A2ATU0	Q80XN0	Dhtkd1	Bdh1	0.809212	Matrix~IMM
A2ATU0	Q8BGC4	Dhtkd1	Zadh2	0.671889	Matrix~Unknown
A2ATU0	Q8BH59	Dhtkd1	Slc25a12	0.67786	Matrix~IMM
A2ATU0	Q8BHG1	Dhtkd1	Nrd1	0.746927	Matrix~Matrix
A2ATU0	Q8BIP0	Dhtkd1	Dars2	0.646443	Matrix~Matrix
A2ATU0	Q8BK30	Dhtkd1	Ndufv3	0.731854	Matrix~IMM
A2ATU0	Q8BMF4	Dhtkd1	Dlat	0.728596	Matrix~Matrix
A2ATU0	Q8BMS1	Dhtkd1	Hadha	0.670965	Matrix~IMM
A2ATU0	Q8BYM8	Dhtkd1	Cars2	0.682509	Matrix~Matrix
A2ATU0	Q8C0T9	Dhtkd1	Adcy10	0.76943	Matrix~Membrane
A2ATU0	Q8C2E4	Dhtkd1	Ptcd1	0.751694	Matrix~Matrix
A2ATU0	Q8CAK1	Dhtkd1	Iba57	0.706732	Matrix~Matrix
A2ATU0	Q8CFA2	Dhtkd1	Amt	0.757404	Matrix~Matrix
A2ATU0	Q8JZQ2	Dhtkd1	Afg3l2	0.759605	Matrix~IMM
A2ATU0	Q8K0D5	Dhtkd1	Gfm1	0.824779	Matrix~Matrix
A2ATU0	Q8K1J6	Dhtkd1	Trnt1	0.650686	Matrix~Matrix
A2ATU0	Q8K2C6	Dhtkd1	Sirt5	0.709817	Matrix~Matrix
A2ATU0	Q8K3J1	Dhtkd1	Ndufs8	0.710266	Matrix~IMM
A2ATU0	Q8K4F5	Dhtkd1	Abhd11	0.657717	Matrix~Matrix
A2ATU0	Q8QZS1	Dhtkd1	Hibch	0.643785	Matrix~Matrix
A2ATU0	Q8R0F8	Dhtkd1	Fahd1	0.689633	Matrix~Matrix
A2ATU0	Q8R0Y6	Dhtkd1	Aldh1l1	0.856842	Matrix~Matrix
A2ATU0	Q8R3J4	Dhtkd1	Mterf3	0.766653	Matrix~Matrix
A2ATU0	Q8VC19	Dhtkd1	Alas1	0.871935	Matrix~Matrix
A2ATU0	Q8VCE6	Dhtkd1	Nt5m	0.7004	Matrix~Matrix
A2ATU0	Q8VE95	Dhtkd1	C030006K11Rik	0.713075	Matrix~Matrix
A2ATU0	Q91VM9	Dhtkd1	Ppa2	0.791163	Matrix~Matrix
A2ATU0	Q91VT4	Dhtkd1	Cbr4	0.735416	Matrix~Matrix
A2ATU0	Q91WD5	Dhtkd1	Ndufs2	0.698603	Matrix~IMM
A2ATU0	Q91XL9	Dhtkd1	Osbpl1a	0.668416	Matrix~Unknown
A2ATU0	Q921G7	Dhtkd1	Etfdh	0.769549	Matrix~IMM
A2ATU0	Q99JB2	Dhtkd1	Stoml2	0.827965	Matrix~IMM
A2ATU0	Q99JR1	Dhtkd1	Sfxn1	0.644264	Matrix~IMM
A2ATU0	Q99L04	Dhtkd1	Dhrs1	0.708043	Matrix~IMM
A2ATU0	Q99NB1	Dhtkd1	Acss1	0.671994	Matrix~IMM
A2ATU0	Q9CPP6	Dhtkd1	Ndufa5	0.701963	Matrix~IMM
A2ATU0	Q9CPU2	Dhtkd1	Ndufb2	0.68878	Matrix~IMM
A2ATU0	Q9CPY7	Dhtkd1	Lap3	0.647487	Matrix~Matrix
A2ATU0	Q9CQ54	Dhtkd1	Ndufc2	0.720791	Matrix~IMM
A2ATU0	Q9CQ91	Dhtkd1	Ndufa3	0.767595	Matrix~IMM
A2ATU0	Q9CQC7	Dhtkd1	Ndufb4	0.868222	Matrix~IMM
A2ATU0	Q9CQH3	Dhtkd1	Ndufb5	0.735956	Matrix~IMM
A2ATU0	Q9CQJ8	Dhtkd1	Ndufb9	0.719966	Matrix~IMM
A2ATU0	Q9CQN1	Dhtkd1	Trap1	0.76804	Matrix~Matrix
A2ATU0	Q9CQT9	Dhtkd1	Rab5if	0.755231	Matrix~IMM
A2ATU0	Q9CQV1	Dhtkd1	Pam16	0.762186	Matrix~IMM
A2ATU0	Q9CQZ5	Dhtkd1	Ndufa6	0.752142	Matrix~IMM
A2ATU0	Q9CQZ6	Dhtkd1	Ndufb3	0.74115	Matrix~IMM
A2ATU0	Q9CR62	Dhtkd1	Slc25a11	0.763572	Matrix~IMM
A2ATU0	Q9CXZ1	Dhtkd1	Ndufs4	0.733803	Matrix~IMM
A2ATU0	Q9CYH2	Dhtkd1	Prxl2a	0.753626	Matrix~Membrane
A2ATU0	Q9CYR0	Dhtkd1	Ssbp1	0.709367	Matrix~Matrix
A2ATU0	Q9CYW4	Dhtkd1	Hdhd3	0.662041	Matrix~Matrix
A2ATU0	Q9CZS1	Dhtkd1	Aldh1b1	0.714085	Matrix~Matrix
A2ATU0	Q9D0M3	Dhtkd1	Cyc1	0.671398	Matrix~IMM
A2ATU0	Q9D6M3	Dhtkd1	Slc25a22	0.873085	Matrix~IMM
A2ATU0	Q9D6S7	Dhtkd1	Mrrf	0.720509	Matrix~Matrix
A2ATU0	Q9D7B6	Dhtkd1	Acad8	0.71894	Matrix~Matrix
A2ATU0	Q9D8W7	Dhtkd1	Ociad2	0.817447	Matrix~Unknown
A2ATU0	Q9DB15	Dhtkd1	Mrpl12	0.685499	Matrix~Matrix
A2ATU0	Q9DB41	Dhtkd1	Slc25a18	0.876166	Matrix~IMM
A2ATU0	Q9DC69	Dhtkd1	Ndufa9	0.655522	Matrix~IMM
A2ATU0	Q9DC70	Dhtkd1	Ndufs7	0.815934	Matrix~IMM
A2ATU0	Q9DCM2	Dhtkd1	Gstk1	0.705942	Matrix~Matrix
A2ATU0	Q9DCT2	Dhtkd1	Ndufs3	0.661965	Matrix~IMM
A2ATU0	Q9DCV6	Dhtkd1	Dele1	0.696399	Matrix~IMM
A2ATU0	Q9DCZ4	Dhtkd1	Apoo	0.667681	Matrix~IMM
A2ATU0	Q9ERI6	Dhtkd1	Rdh14	0.763204	Matrix~Membrane
A2ATU0	Q9JIY5	Dhtkd1	Htra2	0.715733	Matrix~IMM
A2ATU0	Q9JMH6	Dhtkd1	Txnrd1	0.836944	Matrix~Unknown
A2ATU0	Q9QYR9	Dhtkd1	Acot2	0.686751	Matrix~Matrix
A2ATU0	Q9WUR2	Dhtkd1	Eci2	0.688904	Matrix~Matrix
A2ATU0	Q9WVL0	Dhtkd1	Gstz1	0.659299	Matrix~Matrix
A2ATU0	Q9Z2I8	Dhtkd1	Suclg2	0.705793	Matrix~Matrix
A6H611	P11352	Mipep	Gpx1	0.64054	Matrix~Matrix
A6H611	P16125	Mipep	Ldhb	0.686574	Matrix~Unknown
A6H611	P20108	Mipep	Prdx3	0.647823	Matrix~Matrix
A6H611	P38647	Mipep	Hspa9	0.683315	Matrix~Matrix
A6H611	P47199	Mipep	Cryz	0.660299	Matrix~Matrix
A6H611	P47738	Mipep	Aldh2	0.694294	Matrix~Matrix
A6H611	P52503	Mipep	Ndufs6	0.674384	Matrix~IMM
A6H611	P63038	Mipep	Hspd1	0.733874	Matrix~Matrix
A6H611	Q61425	Mipep	Hadh	0.66325	Matrix~Matrix
A6H611	Q7TMF3	Mipep	Ndufa12	0.668189	Matrix~IMM
A6H611	Q80Y14	Mipep	Glrx5	0.649371	Matrix~Matrix
A6H611	Q80ZS3	Mipep	Mrps26	0.714145	Matrix~Matrix
A6H611	Q8R4N0	Mipep	Clybl	0.704484	Matrix~Matrix
A6H611	Q8VDK1	Mipep	Nit1	0.65826	Matrix~Matrix
A6H611	Q91XL9	Mipep	Osbpl1a	0.71517	Matrix~Unknown
A6H611	Q99KB8	Mipep	Hagh	0.680185	Matrix~Matrix
A6H611	Q99KR7	Mipep	Ppif	0.656864	Matrix~Matrix
A6H611	Q99L13	Mipep	Hibadh	0.687441	Matrix~Matrix
A6H611	Q9CPU2	Mipep	Ndufb2	0.644595	Matrix~IMM
A6H611	Q9CPY7	Mipep	Lap3	0.666656	Matrix~Matrix
A6H611	Q9D172	Mipep	Gatd3a	0.64749	Matrix~Matrix
A6H611	Q9D1I5	Mipep	Mcee	0.650513	Matrix~Matrix
A6H611	Q9D6R2	Mipep	Idh3a	0.703785	Matrix~Matrix
A6H611	Q9D799	Mipep	Mtfmt	0.692256	Matrix~Matrix
A6H611	Q9DBF1	Mipep	Aldh7a1	0.669252	Matrix~Matrix
A6H611	Q9DC70	Mipep	Ndufs7	0.736171	Matrix~IMM
A6H611	Q9DCS9	Mipep	Ndufb10	0.654712	Matrix~IMM
A6H611	Q9JHI5	Mipep	Ivd	0.661756	Matrix~Matrix
A6H611	Q9JLT4	Mipep	Txnrd2	0.656642	Matrix~Matrix
A6H611	Q9Z2I9	Mipep	Sucla2	0.744272	Matrix~Matrix
B7ZMP1	O35855	Xpnpep3	Bcat2	0.90132	Matrix~Matrix
B7ZMP1	O88696	Xpnpep3	Clpp	0.712245	Matrix~Matrix
B7ZMP1	O89106	Xpnpep3	Fhit	0.647052	Matrix~Matrix
B7ZMP1	P05132	Xpnpep3	Prkaca	0.782218	Matrix~IMM
B7ZMP1	P09671	Xpnpep3	Sod2	0.705359	Matrix~Matrix
B7ZMP1	P11352	Xpnpep3	Gpx1	0.845775	Matrix~Matrix
B7ZMP1	P28352	Xpnpep3	Apex1	0.791832	Matrix~Matrix
B7ZMP1	P34914	Xpnpep3	Ephx2	0.818868	Matrix~Unknown
B7ZMP1	P35486	Xpnpep3	Pdha1	0.701371	Matrix~Matrix
B7ZMP1	P38060	Xpnpep3	Hmgcl	0.853742	Matrix~Matrix
B7ZMP1	P47738	Xpnpep3	Aldh2	0.753111	Matrix~Matrix
B7ZMP1	P47934	Xpnpep3	Crat	0.742079	Matrix~IMM
B7ZMP1	P48962	Xpnpep3	Slc25a4	0.678226	Matrix~IMM
B7ZMP1	P50171	Xpnpep3	H2-Ke6	0.888978	Matrix~Matrix
B7ZMP1	P52825	Xpnpep3	Cpt2	0.840488	Matrix~IMM
B7ZMP1	P54071	Xpnpep3	Idh2	0.79791	Matrix~Matrix
B7ZMP1	P54116	Xpnpep3	Stom	0.821184	Matrix~Membrane
B7ZMP1	P56380	Xpnpep3	Nudt2	0.846926	Matrix~Matrix
B7ZMP1	P56391	Xpnpep3	Cox6b1	0.794838	Matrix~IMM
B7ZMP1	P62073	Xpnpep3	Timm10	0.77254	Matrix~IMM
B7ZMP1	P70349	Xpnpep3	Hint1	0.724794	Matrix~Unknown
B7ZMP1	P70404	Xpnpep3	Idh3g	0.696341	Matrix~Matrix
B7ZMP1	P84084	Xpnpep3	Arf5	0.766587	Matrix~Unknown
B7ZMP1	P85094	Xpnpep3	Isoc2a	0.744625	Matrix~Matrix
B7ZMP1	P99029	Xpnpep3	Prdx5	0.67172	Matrix~Matrix
B7ZMP1	Q2TPA8	Xpnpep3	Hsdl2	0.708448	Matrix~Matrix
B7ZMP1	Q3TC72	Xpnpep3	Fahd2a	0.794519	Matrix~Matrix
B7ZMP1	Q3TL44	Xpnpep3	Nlrx1	0.647732	Matrix~Matrix
B7ZMP1	Q3U5Q7	Xpnpep3	Cmpk2	0.715453	Matrix~Matrix
B7ZMP1	Q3UNZ8	Xpnpep3	Cryzl2	0.66569	Matrix~Matrix
B7ZMP1	Q3UUI3	Xpnpep3	Them4	0.754642	Matrix~IMM
B7ZMP1	Q3V132	Xpnpep3	Slc25a31	0.779734	Matrix~IMM
B7ZMP1	Q61171	Xpnpep3	Prdx2	0.801808	Matrix~Unknown
B7ZMP1	Q61425	Xpnpep3	Hadh	0.792533	Matrix~Matrix
B7ZMP1	Q6P8J7	Xpnpep3	Ckmt2	0.759492	Matrix~IMM
B7ZMP1	Q80XL6	Xpnpep3	Acad11	0.80369	Matrix~IMM
B7ZMP1	Q80Y14	Xpnpep3	Glrx5	0.825697	Matrix~Matrix
B7ZMP1	Q8BH95	Xpnpep3	Echs1	0.790654	Matrix~Matrix
B7ZMP1	Q8BMF3	Xpnpep3	Me3	0.704578	Matrix~Matrix
B7ZMP1	Q8BMS1	Xpnpep3	Hadha	0.719271	Matrix~IMM
B7ZMP1	Q8BVU5	Xpnpep3	Nudt9	0.844252	Matrix~Matrix
B7ZMP1	Q8BWT1	Xpnpep3	Acaa2	0.716894	Matrix~Matrix
B7ZMP1	Q8BYM8	Xpnpep3	Cars2	0.785812	Matrix~Matrix
B7ZMP1	Q8CAK1	Xpnpep3	Iba57	0.66189	Matrix~Matrix
B7ZMP1	Q8CG76	Xpnpep3	Akr7a5	0.898722	Matrix~Matrix
B7ZMP1	Q8CIW5	Xpnpep3	Twnk	0.870967	Matrix~Matrix
B7ZMP1	Q8K0Z7	Xpnpep3	Taco1	0.830325	Matrix~Matrix
B7ZMP1	Q8K2C6	Xpnpep3	Sirt5	0.731011	Matrix~Matrix
B7ZMP1	Q8K3A0	Xpnpep3	Hscb	0.784985	Matrix~Matrix
B7ZMP1	Q8R0N6	Xpnpep3	Adhfe1	0.766649	Matrix~Matrix
B7ZMP1	Q8R164	Xpnpep3	Bphl	0.738505	Matrix~Matrix
B7ZMP1	Q8R4N0	Xpnpep3	Clybl	0.749456	Matrix~Matrix
B7ZMP1	Q8VDC0	Xpnpep3	Lars2	0.795994	Matrix~Matrix
B7ZMP1	Q8VE38	Xpnpep3	Oxnad1	0.708666	Matrix~Matrix
B7ZMP1	Q91VA6	Xpnpep3	Poldip2	0.858047	Matrix~Matrix
B7ZMP1	Q91VT4	Xpnpep3	Cbr4	0.702318	Matrix~Matrix
B7ZMP1	Q91XL9	Xpnpep3	Osbpl1a	0.702367	Matrix~Unknown
B7ZMP1	Q91YP2	Xpnpep3	Nln	0.72871	Matrix~Matrix
B7ZMP1	Q91YT0	Xpnpep3	Ndufv1	0.668843	Matrix~IMM
B7ZMP1	Q91Z53	Xpnpep3	Grhpr	0.859739	Matrix~Matrix
B7ZMP1	Q99JY0	Xpnpep3	Hadhb	0.827398	Matrix~IMM
B7ZMP1	Q99KB8	Xpnpep3	Hagh	0.661804	Matrix~Matrix
B7ZMP1	Q99KE1	Xpnpep3	Me2	0.642212	Matrix~Matrix
B7ZMP1	Q99LB2	Xpnpep3	Dhrs4	0.783956	Matrix~Matrix
B7ZMP1	Q99LC5	Xpnpep3	Etfa	0.704215	Matrix~Matrix
B7ZMP1	Q99LP6	Xpnpep3	Grpel1	0.742264	Matrix~Matrix
B7ZMP1	Q99NB1	Xpnpep3	Acss1	0.709469	Matrix~IMM
B7ZMP1	Q9CPS6	Xpnpep3	Hint3	0.714127	Matrix~Unknown
B7ZMP1	Q9CPX8	Xpnpep3	Uqcr11	0.769825	Matrix~IMM
B7ZMP1	Q9CQ62	Xpnpep3	Decr1	0.720306	Matrix~Matrix
B7ZMP1	Q9CQR4	Xpnpep3	Acot13	0.764149	Matrix~Matrix
B7ZMP1	Q9CQX8	Xpnpep3	Mrps36	0.710333	Matrix~Matrix
B7ZMP1	Q9CWX4	Xpnpep3	Rpusd4	0.647226	Matrix~Matrix
B7ZMP1	Q9CY16	Xpnpep3	Mrps28	0.804416	Matrix~Matrix
B7ZMP1	Q9D0D3	Xpnpep3	Mtpap	0.802855	Matrix~Matrix
B7ZMP1	Q9D113	Xpnpep3	Dnlz	0.930568	Matrix~Matrix
B7ZMP1	Q9D1I5	Xpnpep3	Mcee	0.807949	Matrix~Matrix
B7ZMP1	Q9D6J6	Xpnpep3	Ndufv2	0.703599	Matrix~IMM
B7ZMP1	Q9D6R2	Xpnpep3	Idh3a	0.644946	Matrix~Matrix
B7ZMP1	Q9D8S4	Xpnpep3	Rexo2	0.752577	Matrix~Matrix
B7ZMP1	Q9DB15	Xpnpep3	Mrpl12	0.770884	Matrix~Matrix
B7ZMP1	Q9DBF1	Xpnpep3	Aldh7a1	0.813718	Matrix~Matrix
B7ZMP1	Q9DC50	Xpnpep3	Crot	0.813114	Matrix~Unknown
B7ZMP1	Q9DCM0	Xpnpep3	Ethe1	0.856802	Matrix~Matrix
B7ZMP1	Q9DCS3	Xpnpep3	Mecr	0.786224	Matrix~Matrix
B7ZMP1	Q9DCV6	Xpnpep3	Dele1	0.791536	Matrix~IMM
B7ZMP1	Q9DCW4	Xpnpep3	Etfb	0.731906	Matrix~Matrix
B7ZMP1	Q9DCZ4	Xpnpep3	Apoo	0.748593	Matrix~IMM
B7ZMP1	Q9EQ20	Xpnpep3	Aldh6a1	0.76667	Matrix~IMM
B7ZMP1	Q9JIY5	Xpnpep3	Htra2	0.668856	Matrix~IMM
B7ZMP1	Q9JK81	Xpnpep3	Myg1	0.727745	Matrix~Matrix
B7ZMP1	Q9JLJ2	Xpnpep3	Aldh9a1	0.741862	Matrix~Matrix
B7ZMP1	Q9R0X4	Xpnpep3	Acot9	0.892199	Matrix~IMM
B7ZMP1	Q9WUR9	Xpnpep3	Ak4	0.772055	Matrix~Matrix
B7ZMP1	Q9WV98	Xpnpep3	Timm9	0.678025	Matrix~IMM
B7ZMP1	Q9WVL0	Xpnpep3	Gstz1	0.841625	Matrix~Matrix
B7ZMP1	Q9Z0X1	Xpnpep3	Aifm1	0.673821	Matrix~IMM
B7ZMP1	Q9Z2I8	Xpnpep3	Suclg2	0.73606	Matrix~Matrix
B7ZMP1	Q9Z2Y8	Xpnpep3	Plpbp	0.807491	Matrix~Matrix
D3Z7P3	O35465	Gls	Fkbp8	0.882316	IMM~OMM
D3Z7P3	O35855	Gls	Bcat2	0.766586	IMM~Matrix
D3Z7P3	O70337	Gls	Bik	0.754699	IMM~OMM
D3Z7P3	O88741	Gls	Gdap1	0.793872	IMM~OMM
D3Z7P3	P00158	Gls	mt-Cytb	0.80174	IMM~IMM
D3Z7P3	P05132	Gls	Prkaca	0.711904	IMM~IMM
D3Z7P3	P09528	Gls	Fth1	0.787383	IMM~Unknown
D3Z7P3	P19096	Gls	Fasn	0.749991	IMM~IMS
D3Z7P3	P20108	Gls	Prdx3	0.766974	IMM~Matrix
D3Z7P3	P24270	Gls	Cat	0.670448	IMM~IMS
D3Z7P3	P32020	Gls	Scp2	0.660156	IMM~IMM
D3Z7P3	P35487	Gls	Pdha2	0.759519	IMM~Matrix
D3Z7P3	P36552	Gls	Cpox	0.675605	IMM~IMM
D3Z7P3	P38647	Gls	Hspa9	0.804035	IMM~Matrix
D3Z7P3	P41216	Gls	Acsl1	0.655034	IMM~OMM
D3Z7P3	P45952	Gls	Acadm	0.658738	IMM~Matrix
D3Z7P3	P50544	Gls	Acadvl	0.833467	IMM~IMM
D3Z7P3	P56135	Gls	Atp5j2	0.779387	IMM~IMM
D3Z7P3	P56380	Gls	Nudt2	0.698495	IMM~Matrix
D3Z7P3	P56382	Gls	Atp5e	0.726534	IMM~IMM
D3Z7P3	P58044	Gls	Idi1	0.756884	IMM~Matrix
D3Z7P3	P63030	Gls	Mpc1	0.774426	IMM~IMM
D3Z7P3	P63038	Gls	Hspd1	0.724102	IMM~Matrix
D3Z7P3	P97450	Gls	Atp5j	0.774771	IMM~IMM
D3Z7P3	P97478	Gls	Coq7	0.844617	IMM~IMM
D3Z7P3	P97493	Gls	Txn2	0.75533	IMM~Matrix
D3Z7P3	P97784	Gls	Cry1	0.818753	IMM~Unknown
D3Z7P3	P99028	Gls	Uqcrh	0.679564	IMM~IMM
D3Z7P3	Q3TBW2	Gls	Mrpl10	0.740361	IMM~Matrix
D3Z7P3	Q3TQB2	Gls	Foxred1	0.773156	IMM~IMM
D3Z7P3	Q3U5Q7	Gls	Cmpk2	0.689145	IMM~Matrix
D3Z7P3	Q3ULD5	Gls	Mccc2	0.789327	IMM~Matrix
D3Z7P3	Q3UV70	Gls	Pdp1	0.69347	IMM~IMM
D3Z7P3	Q4KMM3	Gls	Oxr1	0.74283	IMM~OMM
D3Z7P3	Q4VAE3	Gls	Tmem65	0.692846	IMM~IMM
D3Z7P3	Q59J78	Gls	Ndufaf2	0.643389	IMM~IMM
D3Z7P3	Q5U458	Gls	Dnajc11	0.757183	IMM~OMM
D3Z7P3	Q61171	Gls	Prdx2	0.806651	IMM~Unknown
D3Z7P3	Q61387	Gls	Cox7a2l	0.80553	IMM~IMM
D3Z7P3	Q62425	Gls	Ndufa4	0.648362	IMM~IMM
D3Z7P3	Q64520	Gls	Guk1	0.651415	IMM~Matrix
D3Z7P3	Q64521	Gls	Gpd2	0.739974	IMM~IMM
D3Z7P3	Q6NVE9	Gls	Pptc7	0.786737	IMM~Matrix
D3Z7P3	Q78IK2	Gls	Atp5md	0.767215	IMM~IMM
D3Z7P3	Q7TMF3	Gls	Ndufa12	0.793698	IMM~IMM
D3Z7P3	Q7TMV3	Gls	Fastkd5	0.746182	IMM~Matrix
D3Z7P3	Q7TNE1	Gls	Sugct	0.768035	IMM~Matrix
D3Z7P3	Q80SW1	Gls	Ahcyl1	0.803251	IMM~OMM
D3Z7P3	Q80V03	Gls	Adck5	0.773582	IMM~Unknown
D3Z7P3	Q80VL1	Gls	Tdrkh	0.797338	IMM~Membrane
D3Z7P3	Q8BGC4	Gls	Zadh2	0.667972	IMM~Unknown
D3Z7P3	Q8BGV0	Gls	Nars2	0.673067	IMM~Matrix
D3Z7P3	Q8BGY7	Gls	Fam210a	0.670949	IMM~IMM
D3Z7P3	Q8BH04	Gls	Pck2	0.667553	IMM~Matrix
D3Z7P3	Q8BH59	Gls	Slc25a12	0.752472	IMM~IMM
D3Z7P3	Q8BHG1	Gls	Nrd1	0.775581	IMM~Matrix
D3Z7P3	Q8BK30	Gls	Ndufv3	0.801406	IMM~IMM
D3Z7P3	Q8BP40	Gls	Acp6	0.767318	IMM~IMS
D3Z7P3	Q8BTE0	Gls	Sdhaf4	0.750314	IMM~Matrix
D3Z7P3	Q8BVU5	Gls	Nudt9	0.767278	IMM~Matrix
D3Z7P3	Q8BW75	Gls	Maob	0.685712	IMM~OMM
D3Z7P3	Q8C167	Gls	Prepl	0.796069	IMM~Matrix
D3Z7P3	Q8C2E4	Gls	Ptcd1	0.813926	IMM~Matrix
D3Z7P3	Q8C5H8	Gls	Nadk2	0.771057	IMM~Matrix
D3Z7P3	Q8CBY0	Gls	Gatc	0.644839	IMM~Matrix
D3Z7P3	Q8CC21	Gls	Ttc19	0.721327	IMM~IMM
D3Z7P3	Q8CCM6	Gls	Timm21	0.796967	IMM~IMM
D3Z7P3	Q8CFA2	Gls	Amt	0.646358	IMM~Matrix
D3Z7P3	Q8JZN5	Gls	Acad9	0.674783	IMM~IMM
D3Z7P3	Q8K0D5	Gls	Gfm1	0.767675	IMM~Matrix
D3Z7P3	Q8K1R3	Gls	Pnpt1	0.754047	IMM~Matrix|IMS
D3Z7P3	Q8K1Z0	Gls	Coq9	0.808451	IMM~IMM
D3Z7P3	Q8K2C6	Gls	Sirt5	0.759975	IMM~Matrix
D3Z7P3	Q8K3J1	Gls	Ndufs8	0.781815	IMM~IMM
D3Z7P3	Q8R0F8	Gls	Fahd1	0.714147	IMM~Matrix
D3Z7P3	Q8R0Y6	Gls	Aldh1l1	0.798715	IMM~Matrix
D3Z7P3	Q8R1I1	Gls	Uqcr10	0.771157	IMM~IMM
D3Z7P3	Q8R1R3	Gls	Stard7	0.675031	IMM~IMS
D3Z7P3	Q8VC19	Gls	Alas1	0.711698	IMM~Matrix
D3Z7P3	Q8VCE1	Gls	Dnajc28	0.655542	IMM~Unknown
D3Z7P3	Q8VCX5	Gls	Micu1	0.751166	IMM~IMM
D3Z7P3	Q91V61	Gls	Sfxn3	0.776186	IMM~IMM
D3Z7P3	Q91V92	Gls	Acly	0.745218	IMM~Matrix
D3Z7P3	Q91VD9	Gls	Ndufs1	0.839484	IMM~IMM
D3Z7P3	Q91VM9	Gls	Ppa2	0.792123	IMM~Matrix
D3Z7P3	Q91WD5	Gls	Ndufs2	0.697946	IMM~IMM
D3Z7P3	Q91WK5	Gls	Gcsh	0.793507	IMM~Matrix
D3Z7P3	Q91XF0	Gls	Pnpo	0.66462	IMM~Matrix
D3Z7P3	Q91YT0	Gls	Ndufv1	0.769284	IMM~IMM
D3Z7P3	Q920E5	Gls	Fdps	0.744513	IMM~IMM
D3Z7P3	Q922Q1	Gls	Mtarc2	0.774878	IMM~OMM
D3Z7P3	Q923Z3	Gls	Mto1	0.758866	IMM~Matrix
D3Z7P3	Q99JR1	Gls	Sfxn1	0.734464	IMM~IMM
D3Z7P3	Q99LB2	Gls	Dhrs4	0.709442	IMM~Matrix
D3Z7P3	Q99LC5	Gls	Etfa	0.679799	IMM~Matrix
D3Z7P3	Q99LY9	Gls	Ndufs5	0.738957	IMM~IMM
D3Z7P3	Q99N92	Gls	Mrpl27	0.740548	IMM~Matrix
D3Z7P3	Q9CPP6	Gls	Ndufa5	0.820931	IMM~IMM
D3Z7P3	Q9CPQ3	Gls	Tomm22	0.809821	IMM~OMM
D3Z7P3	Q9CPQ8	Gls	Atp5l	0.699457	IMM~IMM
D3Z7P3	Q9CPW2	Gls	Fdx2	0.801213	IMM~Matrix
D3Z7P3	Q9CPX8	Gls	Uqcr11	0.91767	IMM~IMM
D3Z7P3	Q9CQC7	Gls	Ndufb4	0.815795	IMM~IMM
D3Z7P3	Q9CQJ8	Gls	Ndufb9	0.645913	IMM~IMM
D3Z7P3	Q9CQN1	Gls	Trap1	0.841582	IMM~Matrix
D3Z7P3	Q9CQT9	Gls	Rab5if	0.806435	IMM~IMM
D3Z7P3	Q9CQZ5	Gls	Ndufa6	0.743002	IMM~IMM
D3Z7P3	Q9CR62	Gls	Slc25a11	0.79371	IMM~IMM
D3Z7P3	Q9CXZ1	Gls	Ndufs4	0.807519	IMM~IMM
D3Z7P3	Q9CYH2	Gls	Prxl2a	0.868903	IMM~Membrane
D3Z7P3	Q9CYW4	Gls	Hdhd3	0.691183	IMM~Matrix
D3Z7P3	Q9CZ13	Gls	Uqcrc1	0.646928	IMM~IMM
D3Z7P3	Q9CZL5	Gls	Pcbd2	0.683244	IMM~Unknown
D3Z7P3	Q9CZP5	Gls	Bcs1l	0.716139	IMM~IMM
D3Z7P3	Q9CZS1	Gls	Aldh1b1	0.664986	IMM~Matrix
D3Z7P3	Q9CZW5	Gls	Tomm70a	0.671245	IMM~OMM
D3Z7P3	Q9D023	Gls	Mpc2	0.652206	IMM~IMM
D3Z7P3	Q9D6J6	Gls	Ndufv2	0.688923	IMM~IMM
D3Z7P3	Q9D6M3	Gls	Slc25a22	0.710427	IMM~IMM
D3Z7P3	Q9D6R2	Gls	Idh3a	0.720326	IMM~Matrix
D3Z7P3	Q9D6U8	Gls	Fam162a	0.698778	IMM~IMM
D3Z7P3	Q9D6Y7	Gls	Msra	0.79248	IMM~Matrix
D3Z7P3	Q9D7B6	Gls	Acad8	0.698988	IMM~Matrix
D3Z7P3	Q9D880	Gls	Timm50	0.779388	IMM~IMM
D3Z7P3	Q9D8W7	Gls	Ociad2	0.803949	IMM~Unknown
D3Z7P3	Q9DB41	Gls	Slc25a18	0.743725	IMM~IMM
D3Z7P3	Q9DC61	Gls	Pmpca	0.650864	IMM~Matrix
D3Z7P3	Q9DC69	Gls	Ndufa9	0.741389	IMM~IMM
D3Z7P3	Q9DC70	Gls	Ndufs7	0.79506	IMM~IMM
D3Z7P3	Q9DCB8	Gls	Isca2	0.691201	IMM~Matrix
D3Z7P3	Q9DCJ5	Gls	Ndufa8	0.693206	IMM~IMM
D3Z7P3	Q9DCM0	Gls	Ethe1	0.671567	IMM~Matrix
D3Z7P3	Q9DCS9	Gls	Ndufb10	0.730431	IMM~IMM
D3Z7P3	Q9DCT2	Gls	Ndufs3	0.742343	IMM~IMM
D3Z7P3	Q9ERB0	Gls	Snap29	0.64057	IMM~IMS
D3Z7P3	Q9JHI5	Gls	Ivd	0.667872	IMM~Matrix
D3Z7P3	Q9JHW2	Gls	Nit2	0.669195	IMM~Unknown
D3Z7P3	Q9JIQ3	Gls	Diablo	0.752466	IMM~IMS
D3Z7P3	Q9JIY5	Gls	Htra2	0.771237	IMM~IMM
D3Z7P3	Q9JLJ2	Gls	Aldh9a1	0.728347	IMM~Matrix
D3Z7P3	Q9JLT4	Gls	Txnrd2	0.66001	IMM~Matrix
D3Z7P3	Q9QX60	Gls	Dguok	0.720279	IMM~Matrix
D3Z7P3	Q9QZ23	Gls	Nfu1	0.824952	IMM~Matrix
D3Z7P3	Q9WTP6	Gls	Ak2	0.720056	IMM~IMS
D3Z7P3	Q9WV98	Gls	Timm9	0.671794	IMM~IMM
D3Z7P3	Q9Z2I8	Gls	Suclg2	0.789132	IMM~Matrix
O08600	P32020	Endog	Scp2	0.645414	IMS~IMM
O08600	P70349	Endog	Hint1	0.815471	IMS~Unknown
O08600	Q07813	Endog	Bax	0.896739	IMS~OMM
O08600	Q3V384	Endog	Afg1l	0.793286	IMS~IMM
O08600	Q61576	Endog	Fkbp10	0.834879	IMS~IMS
O08600	Q8BGD8	Endog	Coa6	0.681547	IMS~IMS
O08600	Q8BP40	Endog	Acp6	0.694288	IMS~IMS
O08600	Q922G0	Endog	Slc25a36	0.915836	IMS~IMM
O08600	Q9D1R1	Endog	Tmem126b	0.87786	IMS~IMM
O08600	Q9D6U8	Endog	Fam162a	0.735032	IMS~IMM
O08600	Q9DCS9	Endog	Ndufb10	0.661047	IMS~IMM
O08600	Q9EQ20	Endog	Aldh6a1	0.725484	IMS~IMM
O08600	Q9JHW2	Endog	Nit2	0.715803	IMS~Unknown
O08600	Q9WU79	Endog	Prodh	0.897772	IMS~IMM
O08709	O35855	Prdx6	Bcat2	0.816179	Unknown~Matrix
O08709	P00158	Prdx6	mt-Cytb	0.741987	Unknown~IMM
O08709	P09671	Prdx6	Sod2	0.746025	Unknown~Matrix
O08709	P16125	Prdx6	Ldhb	0.693932	Unknown~Unknown
O08709	P24270	Prdx6	Cat	0.730613	Unknown~IMS
O08709	P32020	Prdx6	Scp2	0.678744	Unknown~IMM
O08709	P34914	Prdx6	Ephx2	0.73919	Unknown~Unknown
O08709	P38060	Prdx6	Hmgcl	0.675053	Unknown~Matrix
O08709	P47934	Prdx6	Crat	0.70881	Unknown~IMM
O08709	P50171	Prdx6	H2-Ke6	0.664079	Unknown~Matrix
O08709	P51660	Prdx6	Hsd17b4	0.729987	Unknown~Unknown
O08709	P52503	Prdx6	Ndufs6	0.705174	Unknown~IMM
O08709	P54116	Prdx6	Stom	0.711618	Unknown~Membrane
O08709	P56380	Prdx6	Nudt2	0.753245	Unknown~Matrix
O08709	P62073	Prdx6	Timm10	0.690336	Unknown~IMM
O08709	P84084	Prdx6	Arf5	0.737817	Unknown~Unknown
O08709	P97784	Prdx6	Cry1	0.727718	Unknown~Unknown
O08709	P99028	Prdx6	Uqcrh	0.697302	Unknown~IMM
O08709	P99029	Prdx6	Prdx5	0.729909	Unknown~Matrix
O08709	Q14DK4	Prdx6	Gpat2	0.749563	Unknown~OMM
O08709	Q3TC72	Prdx6	Fahd2a	0.72569	Unknown~Matrix
O08709	Q3TL44	Prdx6	Nlrx1	0.795004	Unknown~Matrix
O08709	Q3U5Q7	Prdx6	Cmpk2	0.685162	Unknown~Matrix
O08709	Q3UGX3	Prdx6	Nat8l	0.831909	Unknown~Membrane
O08709	Q3UNZ8	Prdx6	Cryzl2	0.729856	Unknown~Matrix
O08709	Q3URE1	Prdx6	Acsf3	0.645353	Unknown~Matrix
O08709	Q3UUI3	Prdx6	Them4	0.698787	Unknown~IMM
O08709	Q3V132	Prdx6	Slc25a31	0.721021	Unknown~IMM
O08709	Q61387	Prdx6	Cox7a2l	0.647402	Unknown~IMM
O08709	Q61578	Prdx6	Fdxr	0.706804	Unknown~Matrix
O08709	Q64433	Prdx6	Hspe1	0.690756	Unknown~Matrix
O08709	Q6PCP5	Prdx6	Mff	0.665214	Unknown~OMM
O08709	Q7TMF3	Prdx6	Ndufa12	0.733144	Unknown~IMM
O08709	Q80SX8	Prdx6	Pif1	0.831097	Unknown~Matrix
O08709	Q80VL1	Prdx6	Tdrkh	0.699045	Unknown~Membrane
O08709	Q80XL6	Prdx6	Acad11	0.763797	Unknown~IMM
O08709	Q80Y81	Prdx6	Elac2	0.697302	Unknown~Matrix
O08709	Q811U4	Prdx6	Mfn1	0.665424	Unknown~OMM
O08709	Q8BH86	Prdx6	Dglucy	0.806226	Unknown~Matrix
O08709	Q8BH95	Prdx6	Echs1	0.800781	Unknown~Matrix
O08709	Q8BK30	Prdx6	Ndufv3	0.66634	Unknown~IMM
O08709	Q8BMF3	Prdx6	Me3	0.653644	Unknown~Matrix
O08709	Q8BMS1	Prdx6	Hadha	0.648747	Unknown~IMM
O08709	Q8BVU5	Prdx6	Nudt9	0.78119	Unknown~Matrix
O08709	Q8CCM6	Prdx6	Timm21	0.700493	Unknown~IMM
O08709	Q8CCT7	Prdx6	Nsun3	0.776349	Unknown~Matrix
O08709	Q8CG76	Prdx6	Akr7a5	0.746633	Unknown~Matrix
O08709	Q8CIW5	Prdx6	Twnk	0.725696	Unknown~Matrix
O08709	Q8K009	Prdx6	Aldh1l2	0.819026	Unknown~Matrix
O08709	Q8K0Z7	Prdx6	Taco1	0.821934	Unknown~Matrix
O08709	Q8K1J6	Prdx6	Trnt1	0.656821	Unknown~Matrix
O08709	Q8K2C6	Prdx6	Sirt5	0.71466	Unknown~Matrix
O08709	Q8K3A0	Prdx6	Hscb	0.784813	Unknown~Matrix
O08709	Q8QZS1	Prdx6	Hibch	0.641481	Unknown~Matrix
O08709	Q8R035	Prdx6	Mrpl58	0.748083	Unknown~Matrix
O08709	Q8R0F8	Prdx6	Fahd1	0.699414	Unknown~Matrix
O08709	Q8R0N6	Prdx6	Adhfe1	0.839042	Unknown~Matrix
O08709	Q8R4H7	Prdx6	Nags	0.850986	Unknown~Matrix
O08709	Q8R4N0	Prdx6	Clybl	0.690836	Unknown~Matrix
O08709	Q8VDC0	Prdx6	Lars2	0.764343	Unknown~Matrix
O08709	Q8VE38	Prdx6	Oxnad1	0.749272	Unknown~Matrix
O08709	Q91V12	Prdx6	Acot7	0.733331	Unknown~Matrix
O08709	Q91VA6	Prdx6	Poldip2	0.755403	Unknown~Matrix
O08709	Q91VD9	Prdx6	Ndufs1	0.655644	Unknown~IMM
O08709	Q91WD5	Prdx6	Ndufs2	0.668654	Unknown~IMM
O08709	Q91XL9	Prdx6	Osbpl1a	0.653981	Unknown~Unknown
O08709	Q91YP2	Prdx6	Nln	0.8303	Unknown~Matrix
O08709	Q920E5	Prdx6	Fdps	0.733265	Unknown~IMM
O08709	Q921H9	Prdx6	Coa7	0.819026	Unknown~IMS
O08709	Q99JY0	Prdx6	Hadhb	0.741577	Unknown~IMM
O08709	Q99LP6	Prdx6	Grpel1	0.765595	Unknown~Matrix
O08709	Q99NB1	Prdx6	Acss1	0.664637	Unknown~IMM
O08709	Q9CPS6	Prdx6	Hint3	0.756624	Unknown~Unknown
O08709	Q9CQ92	Prdx6	Fis1	0.650135	Unknown~OMM
O08709	Q9CQC7	Prdx6	Ndufb4	0.716701	Unknown~IMM
O08709	Q9CQZ5	Prdx6	Ndufa6	0.700557	Unknown~IMM
O08709	Q9CQZ6	Prdx6	Ndufb3	0.780971	Unknown~IMM
O08709	Q9CWX4	Prdx6	Rpusd4	0.72648	Unknown~Matrix
O08709	Q9CY16	Prdx6	Mrps28	0.750592	Unknown~Matrix
O08709	Q9D023	Prdx6	Mpc2	0.694108	Unknown~IMM
O08709	Q9D0D3	Prdx6	Mtpap	0.769934	Unknown~Matrix
O08709	Q9D113	Prdx6	Dnlz	0.768559	Unknown~Matrix
O08709	Q9D1I5	Prdx6	Mcee	0.760586	Unknown~Matrix
O08709	Q9D1L0	Prdx6	Chchd2	0.73387	Unknown~IMS
O08709	Q9D6K8	Prdx6	Fundc2	0.798309	Unknown~OMM
O08709	Q9D8S4	Prdx6	Rexo2	0.729731	Unknown~Matrix
O08709	Q9DB15	Prdx6	Mrpl12	0.770475	Unknown~Matrix
O08709	Q9DBM2	Prdx6	Ehhadh	0.64487	Unknown~Unknown
O08709	Q9DC50	Prdx6	Crot	0.735491	Unknown~Unknown
O08709	Q9DC70	Prdx6	Ndufs7	0.800121	Unknown~IMM
O08709	Q9DCJ5	Prdx6	Ndufa8	0.666083	Unknown~IMM
O08709	Q9DCM0	Prdx6	Ethe1	0.784064	Unknown~Matrix
O08709	Q9DCS3	Prdx6	Mecr	0.840628	Unknown~Matrix
O08709	Q9DCV4	Prdx6	Rmdn1	0.753242	Unknown~OMM
O08709	Q9DCV6	Prdx6	Dele1	0.801601	Unknown~IMM
O08709	Q9DCW4	Prdx6	Etfb	0.889583	Unknown~Matrix
O08709	Q9EQ20	Prdx6	Aldh6a1	0.686773	Unknown~IMM
O08709	Q9JK81	Prdx6	Myg1	0.805854	Unknown~Matrix
O08709	Q9JLZ3	Prdx6	Auh	0.731364	Unknown~Matrix
O08709	Q9R0X4	Prdx6	Acot9	0.776936	Unknown~IMM
O08709	Q9R257	Prdx6	Hebp1	0.718165	Unknown~IMS
O08709	Q9WUR9	Prdx6	Ak4	0.661192	Unknown~Matrix
O08709	Q9Z0X1	Prdx6	Aifm1	0.782938	Unknown~IMM
O08709	Q9Z1P6	Prdx6	Ndufa7	0.703221	Unknown~IMM
O08749	P20108	Dld	Prdx3	0.784348	Matrix~Matrix
O08749	P35486	Dld	Pdha1	0.774467	Matrix~Matrix
O08749	P35487	Dld	Pdha2	0.671657	Matrix~Matrix
O08749	P38647	Dld	Hspa9	0.843193	Matrix~Matrix
O08749	P50544	Dld	Acadvl	0.748345	Matrix~IMM
O08749	P54116	Dld	Stom	0.652637	Matrix~Membrane
O08749	P56382	Dld	Atp5e	0.681261	Matrix~IMM
O08749	P97478	Dld	Coq7	0.641794	Matrix~IMM
O08749	Q3TL44	Dld	Nlrx1	0.689318	Matrix~Matrix
O08749	Q3ULD5	Dld	Mccc2	0.731015	Matrix~Matrix
O08749	Q3V3R1	Dld	Mthfd1l	0.701607	Matrix~Matrix
O08749	Q571F8	Dld	Gls2	0.692462	Matrix~Matrix
O08749	Q59J78	Dld	Ndufaf2	0.794845	Matrix~IMM
O08749	Q5M8N4	Dld	Sdr39u1	0.731156	Matrix~Unknown
O08749	Q60597	Dld	Ogdh	0.794884	Matrix~Matrix
O08749	Q61171	Dld	Prdx2	0.831111	Matrix~Unknown
O08749	Q64521	Dld	Gpd2	0.677909	Matrix~IMM
O08749	Q6PB66	Dld	Lrpprc	0.723677	Matrix~Matrix
O08749	Q78IK2	Dld	Atp5md	0.643715	Matrix~IMM
O08749	Q7TNE1	Dld	Sugct	0.669264	Matrix~Matrix
O08749	Q7TNG8	Dld	Ldhd	0.717472	Matrix~IMM
O08749	Q7TSQ8	Dld	Pdpr	0.755139	Matrix~Matrix
O08749	Q80XN0	Dld	Bdh1	0.691197	Matrix~IMM
O08749	Q8BH59	Dld	Slc25a12	0.733896	Matrix~IMM
O08749	Q8BHG1	Dld	Nrd1	0.670293	Matrix~Matrix
O08749	Q8BMS1	Dld	Hadha	0.674867	Matrix~IMM
O08749	Q8BTE0	Dld	Sdhaf4	0.647567	Matrix~Matrix
O08749	Q8BYL4	Dld	Yars2	0.782298	Matrix~Matrix
O08749	Q8CGS6	Dld	Polq	0.671357	Matrix~Matrix
O08749	Q8K009	Dld	Aldh1l2	0.69913	Matrix~Matrix
O08749	Q8R4H7	Dld	Nags	0.696372	Matrix~Matrix
O08749	Q8VCE1	Dld	Dnajc28	0.717934	Matrix~Unknown
O08749	Q8VE22	Dld	Mrps23	0.732858	Matrix~Matrix
O08749	Q91V92	Dld	Acly	0.720388	Matrix~Matrix
O08749	Q91WD5	Dld	Ndufs2	0.7092	Matrix~IMM
O08749	Q91WK5	Dld	Gcsh	0.643674	Matrix~Matrix
O08749	Q922Q4	Dld	Pycr2	0.659923	Matrix~Matrix
O08749	Q99L04	Dld	Dhrs1	0.755767	Matrix~IMM
O08749	Q99N92	Dld	Mrpl27	0.676303	Matrix~Matrix
O08749	Q9CPP6	Dld	Ndufa5	0.662304	Matrix~IMM
O08749	Q9CPQ8	Dld	Atp5l	0.758897	Matrix~IMM
O08749	Q9CQN7	Dld	Mrpl41	0.693122	Matrix~Matrix
O08749	Q9CQT9	Dld	Rab5if	0.673699	Matrix~IMM
O08749	Q9CQY6	Dld	Uqcc2	0.724545	Matrix~IMM
O08749	Q9CR62	Dld	Slc25a11	0.685981	Matrix~IMM
O08749	Q9CYH2	Dld	Prxl2a	0.711068	Matrix~Membrane
O08749	Q9CZD3	Dld	Gars	0.70321	Matrix~Matrix
O08749	Q9D023	Dld	Mpc2	0.660666	Matrix~IMM
O08749	Q9D051	Dld	Pdhb	0.703096	Matrix~Matrix
O08749	Q9D3D9	Dld	Atp5d	0.666114	Matrix~IMM
O08749	Q9D404	Dld	Oxsm	0.693553	Matrix~Matrix
O08749	Q9D6U8	Dld	Fam162a	0.732895	Matrix~IMM
O08749	Q9D9V3	Dld	Echdc1	0.674695	Matrix~Unknown
O08749	Q9DA03	Dld	Lyrm7	0.701605	Matrix~Matrix
O08749	Q9DB41	Dld	Slc25a18	0.657557	Matrix~IMM
O08749	Q9DC61	Dld	Pmpca	0.722907	Matrix~Matrix
O08749	Q9DCZ4	Dld	Apoo	0.707161	Matrix~IMM
O08749	Q9JIK9	Dld	Mrps34	0.646381	Matrix~Matrix
O08807	Q4VAE3	Prdx4	Tmem65	0.722001	IMS~IMM
O08807	Q5SUC9	Prdx4	Sco1	0.849603	IMS~IMM
O08807	Q8R086	Prdx4	Suox	0.716788	IMS~IMS
O08807	Q91V61	Prdx4	Sfxn3	0.68025	IMS~IMM
O08807	Q91VD9	Prdx4	Ndufs1	0.661188	IMS~IMM
O08807	Q9CPQ8	Prdx4	Atp5l	0.654082	IMS~IMM
O08807	Q9CQ85	Prdx4	Timm22	0.659252	IMS~IMM
O08807	Q9CRD0	Prdx4	Ociad1	0.752709	IMS~OMM
O08807	Q9CX83	Prdx4	Armcx1	0.755336	IMS~OMM
O08807	Q9DC69	Prdx4	Ndufa9	0.698982	IMS~IMM
O08807	Q9WV96	Prdx4	Timm10b	0.794861	IMS~IMM
O09111	P00158	Ndufb11	mt-Cytb	0.847648	IMM~IMM
O09111	P08228	Ndufb11	Sod1	0.716738	IMM~IMS
O09111	P09671	Ndufb11	Sod2	0.88206	IMM~Matrix
O09111	P32020	Ndufb11	Scp2	0.693586	IMM~IMM
O09111	P34914	Ndufb11	Ephx2	0.716805	IMM~Unknown
O09111	P35487	Ndufb11	Pdha2	0.839078	IMM~Matrix
O09111	P42125	Ndufb11	Eci1	0.775508	IMM~Matrix
O09111	P52503	Ndufb11	Ndufs6	0.726426	IMM~IMM
O09111	P59017	Ndufb11	Bcl2l13	0.737876	IMM~OMM
O09111	P62897	Ndufb11	Cycs	0.663263	IMM~IMS
O09111	P70349	Ndufb11	Hint1	0.812738	IMM~Unknown
O09111	P97478	Ndufb11	Coq7	0.679138	IMM~IMM
O09111	P97784	Ndufb11	Cry1	0.811056	IMM~Unknown
O09111	P99028	Ndufb11	Uqcrh	0.829332	IMM~IMM
O09111	Q14DH7	Ndufb11	Acss3	0.671847	IMM~Matrix
O09111	Q3UIU2	Ndufb11	Ndufb6	0.876115	IMM~IMM
O09111	Q3ULD5	Ndufb11	Mccc2	0.719519	IMM~Matrix
O09111	Q3URE1	Ndufb11	Acsf3	0.674193	IMM~Matrix
O09111	Q5U458	Ndufb11	Dnajc11	0.804177	IMM~OMM
O09111	Q60930	Ndufb11	Vdac2	0.845783	IMM~OMM
O09111	Q60931	Ndufb11	Vdac3	0.769793	IMM~OMM
O09111	Q61387	Ndufb11	Cox7a2l	0.82098	IMM~IMM
O09111	Q64445	Ndufb11	Cox8a	0.669288	IMM~IMM
O09111	Q791T5	Ndufb11	Mtch1	0.690038	IMM~OMM
O09111	Q791V5	Ndufb11	Mtch2	0.832411	IMM~OMM
O09111	Q7TMF3	Ndufb11	Ndufa12	0.832455	IMM~IMM
O09111	Q7TMV3	Ndufb11	Fastkd5	0.716576	IMM~Matrix
O09111	Q7TNE1	Ndufb11	Sugct	0.831333	IMM~Matrix
O09111	Q7TSQ8	Ndufb11	Pdpr	0.786986	IMM~Matrix
O09111	Q80VL1	Ndufb11	Tdrkh	0.787916	IMM~Membrane
O09111	Q80Y14	Ndufb11	Glrx5	0.762521	IMM~Matrix
O09111	Q8BK30	Ndufb11	Ndufv3	0.660222	IMM~IMM
O09111	Q8BTE0	Ndufb11	Sdhaf4	0.751929	IMM~Matrix
O09111	Q8C163	Ndufb11	Exog	0.7304	IMM~IMM
O09111	Q8C2E4	Ndufb11	Ptcd1	0.860612	IMM~Matrix
O09111	Q8CC88	Ndufb11	Vwa8	0.693717	IMM~Matrix
O09111	Q8CCM6	Ndufb11	Timm21	0.779654	IMM~IMM
O09111	Q8CGS6	Ndufb11	Polq	0.707923	IMM~Matrix
O09111	Q8K0D5	Ndufb11	Gfm1	0.735784	IMM~Matrix
O09111	Q8K3J1	Ndufb11	Ndufs8	0.779333	IMM~IMM
O09111	Q8R1I1	Ndufb11	Uqcr10	0.878156	IMM~IMM
O09111	Q8R3J4	Ndufb11	Mterf3	0.731732	IMM~Matrix
O09111	Q8VC19	Ndufb11	Alas1	0.776683	IMM~Matrix
O09111	Q8VCM5	Ndufb11	Mul1	0.646021	IMM~OMM
O09111	Q91V12	Ndufb11	Acot7	0.824115	IMM~Matrix
O09111	Q91VD9	Ndufb11	Ndufs1	0.796047	IMM~IMM
O09111	Q91VM9	Ndufb11	Ppa2	0.799283	IMM~Matrix
O09111	Q91WD5	Ndufb11	Ndufs2	0.767329	IMM~IMM
O09111	Q91XL9	Ndufb11	Osbpl1a	0.644886	IMM~Unknown
O09111	Q920E5	Ndufb11	Fdps	0.690515	IMM~IMM
O09111	Q921G7	Ndufb11	Etfdh	0.708482	IMM~IMM
O09111	Q921H8	Ndufb11	Acaa1a	0.73371	IMM~Matrix
O09111	Q922Q1	Ndufb11	Mtarc2	0.904132	IMM~OMM
O09111	Q923Z3	Ndufb11	Mto1	0.685868	IMM~Matrix
O09111	Q99LC3	Ndufb11	Ndufa10	0.71267	IMM~IMM
O09111	Q99LC5	Ndufb11	Etfa	0.669462	IMM~Matrix
O09111	Q99LX0	Ndufb11	Park7	0.646314	IMM~OMM
O09111	Q99LY9	Ndufb11	Ndufs5	0.73819	IMM~IMM
O09111	Q9CPP6	Ndufb11	Ndufa5	0.708963	IMM~IMM
O09111	Q9CPQ3	Ndufb11	Tomm22	0.842411	IMM~OMM
O09111	Q9CPU2	Ndufb11	Ndufb2	0.873355	IMM~IMM
O09111	Q9CQ54	Ndufb11	Ndufc2	0.908195	IMM~IMM
O09111	Q9CQ69	Ndufb11	Uqcrq	0.692992	IMM~IMM
O09111	Q9CQ75	Ndufb11	Ndufa2	0.845553	IMM~IMM
O09111	Q9CQ91	Ndufb11	Ndufa3	0.877787	IMM~IMM
O09111	Q9CQ92	Ndufb11	Fis1	0.769025	IMM~OMM
O09111	Q9CQC7	Ndufb11	Ndufb4	0.912473	IMM~IMM
O09111	Q9CQH3	Ndufb11	Ndufb5	0.938784	IMM~IMM
O09111	Q9CQJ8	Ndufb11	Ndufb9	0.870485	IMM~IMM
O09111	Q9CQT9	Ndufb11	Rab5if	0.914768	IMM~IMM
O09111	Q9CQX2	Ndufb11	Cyb5b	0.729967	IMM~OMM
O09111	Q9CQZ5	Ndufb11	Ndufa6	0.807244	IMM~IMM
O09111	Q9CQZ6	Ndufb11	Ndufb3	0.879284	IMM~IMM
O09111	Q9CR21	Ndufb11	Ndufab1	0.888303	IMM~IMM
O09111	Q9CR61	Ndufb11	Ndufb7	0.940128	IMM~IMM
O09111	Q9CR62	Ndufb11	Slc25a11	0.91049	IMM~IMM
O09111	Q9CR68	Ndufb11	Uqcrfs1	0.664654	IMM~IMM
O09111	Q9CRD0	Ndufb11	Ociad1	0.708479	IMM~OMM
O09111	Q9CXZ1	Ndufb11	Ndufs4	0.724191	IMM~IMM
O09111	Q9CYH2	Ndufb11	Prxl2a	0.852306	IMM~Membrane
O09111	Q9CZU6	Ndufb11	Cs	0.752016	IMM~Matrix
O09111	Q9D023	Ndufb11	Mpc2	0.706329	IMM~IMM
O09111	Q9D0M3	Ndufb11	Cyc1	0.791628	IMM~IMM
O09111	Q9D0S9	Ndufb11	Hint2	0.706068	IMM~Matrix
O09111	Q9D172	Ndufb11	Gatd3a	0.774087	IMM~Matrix
O09111	Q9D173	Ndufb11	Tomm7	0.823729	IMM~OMM
O09111	Q9D2R6	Ndufb11	Coa3	0.687399	IMM~IMM
O09111	Q9D6J5	Ndufb11	Ndufb8	0.924432	IMM~IMM
O09111	Q9D6J6	Ndufb11	Ndufv2	0.892591	IMM~IMM
O09111	Q9D6Y7	Ndufb11	Msra	0.660792	IMM~Matrix
O09111	Q9D8W7	Ndufb11	Ociad2	0.726554	IMM~Unknown
O09111	Q9DB10	Ndufb11	Smdt1	0.851889	IMM~IMM
O09111	Q9DB41	Ndufb11	Slc25a18	0.677557	IMM~IMM
O09111	Q9DB77	Ndufb11	Uqcrc2	0.679454	IMM~IMM
O09111	Q9DC69	Ndufb11	Ndufa9	0.788792	IMM~IMM
O09111	Q9DC70	Ndufb11	Ndufs7	0.821557	IMM~IMM
O09111	Q9DCC8	Ndufb11	Tomm20	0.894403	IMM~OMM
O09111	Q9DCJ5	Ndufb11	Ndufa8	0.856697	IMM~IMM
O09111	Q9DCM2	Ndufb11	Gstk1	0.685758	IMM~Matrix
O09111	Q9DCS9	Ndufb11	Ndufb10	0.82882	IMM~IMM
O09111	Q9DCT2	Ndufb11	Ndufs3	0.799838	IMM~IMM
O09111	Q9JLT4	Ndufb11	Txnrd2	0.670135	IMM~Matrix
O09111	Q9WUR9	Ndufb11	Ak4	0.641194	IMM~Matrix
O09111	Q9Z0X1	Ndufb11	Aifm1	0.86558	IMM~IMM
O09111	Q9Z1P6	Ndufb11	Ndufa7	0.892777	IMM~IMM
O09174	P09671	Amacr	Sod2	0.667711	Matrix~Matrix
O09174	P11352	Amacr	Gpx1	0.799351	Matrix~Matrix
O09174	P28352	Amacr	Apex1	0.872745	Matrix~Matrix
O09174	P32020	Amacr	Scp2	0.902547	Matrix~IMM
O09174	P34914	Amacr	Ephx2	0.805275	Matrix~Unknown
O09174	P38060	Amacr	Hmgcl	0.861739	Matrix~Matrix
O09174	P40630	Amacr	Tfam	0.726203	Matrix~Matrix
O09174	P47199	Amacr	Cryz	0.781149	Matrix~Matrix
O09174	P50171	Amacr	H2-Ke6	0.936954	Matrix~Matrix
O09174	P52825	Amacr	Cpt2	0.873548	Matrix~IMM
O09174	P54071	Amacr	Idh2	0.856376	Matrix~Matrix
O09174	P54116	Amacr	Stom	0.668873	Matrix~Membrane
O09174	P56380	Amacr	Nudt2	0.754157	Matrix~Matrix
O09174	P58044	Amacr	Idi1	0.864568	Matrix~Matrix
O09174	P62075	Amacr	Timm13	0.744387	Matrix~IMM
O09174	P70349	Amacr	Hint1	0.757004	Matrix~Unknown
O09174	P85094	Amacr	Isoc2a	0.797723	Matrix~Matrix
O09174	P97823	Amacr	Lypla1	0.910839	Matrix~Unknown
O09174	Q3TC72	Amacr	Fahd2a	0.712767	Matrix~Matrix
O09174	Q3TIU4	Amacr	Pde12	0.665257	Matrix~Matrix
O09174	Q3UNZ8	Amacr	Cryzl2	0.820659	Matrix~Matrix
O09174	Q3UUI3	Amacr	Them4	0.848382	Matrix~IMM
O09174	Q3V132	Amacr	Slc25a31	0.704534	Matrix~IMM
O09174	Q5SWU9	Amacr	Acaca	0.656581	Matrix~Matrix
O09174	Q61425	Amacr	Hadh	0.745408	Matrix~Matrix
O09174	Q61578	Amacr	Fdxr	0.826745	Matrix~Matrix
O09174	Q64520	Amacr	Guk1	0.939064	Matrix~Matrix
O09174	Q6NSW3	Amacr	Sphkap	0.691374	Matrix~IMM
O09174	Q6P8J7	Amacr	Ckmt2	0.850234	Matrix~IMM
O09174	Q80ZS3	Amacr	Mrps26	0.664062	Matrix~Matrix
O09174	Q8BH95	Amacr	Echs1	0.696614	Matrix~Matrix
O09174	Q8BWT1	Amacr	Acaa2	0.74607	Matrix~Matrix
O09174	Q8BYM8	Amacr	Cars2	0.663907	Matrix~Matrix
O09174	Q8C460	Amacr	Eri3	0.830939	Matrix~Matrix
O09174	Q8CAK1	Amacr	Iba57	0.741863	Matrix~Matrix
O09174	Q8CHT0	Amacr	Aldh4a1	0.676399	Matrix~Matrix
O09174	Q8K1J6	Amacr	Trnt1	0.741601	Matrix~Matrix
O09174	Q8K2C6	Amacr	Sirt5	0.801823	Matrix~Matrix
O09174	Q8K4F5	Amacr	Abhd11	0.851448	Matrix~Matrix
O09174	Q8QZS1	Amacr	Hibch	0.756797	Matrix~Matrix
O09174	Q8R0F8	Amacr	Fahd1	0.640499	Matrix~Matrix
O09174	Q8R4N0	Amacr	Clybl	0.699386	Matrix~Matrix
O09174	Q8VC19	Amacr	Alas1	0.681586	Matrix~Matrix
O09174	Q8VCE6	Amacr	Nt5m	0.872633	Matrix~Matrix
O09174	Q8VCH0	Amacr	Acaa1b	0.894434	Matrix~Unknown
O09174	Q91V61	Amacr	Sfxn3	0.713609	Matrix~IMM
O09174	Q91VT4	Amacr	Cbr4	0.763575	Matrix~Matrix
O09174	Q91XL9	Amacr	Osbpl1a	0.710101	Matrix~Unknown
O09174	Q91Z53	Amacr	Grhpr	0.745787	Matrix~Matrix
O09174	Q921H8	Amacr	Acaa1a	0.83351	Matrix~Matrix
O09174	Q99KB8	Amacr	Hagh	0.667543	Matrix~Matrix
O09174	Q99LB2	Amacr	Dhrs4	0.904753	Matrix~Matrix
O09174	Q99LB7	Amacr	Sardh	0.647335	Matrix~Matrix
O09174	Q9CPY7	Amacr	Lap3	0.838612	Matrix~Matrix
O09174	Q9CQ62	Amacr	Decr1	0.827147	Matrix~Matrix
O09174	Q9CQR4	Amacr	Acot13	0.809509	Matrix~Matrix
O09174	Q9CYW4	Amacr	Hdhd3	0.924746	Matrix~Matrix
O09174	Q9D1I5	Amacr	Mcee	0.90245	Matrix~Matrix
O09174	Q9D1R1	Amacr	Tmem126b	0.691053	Matrix~IMM
O09174	Q9D6S7	Amacr	Mrrf	0.655704	Matrix~Matrix
O09174	Q9D799	Amacr	Mtfmt	0.79053	Matrix~Matrix
O09174	Q9DB15	Amacr	Mrpl12	0.816965	Matrix~Matrix
O09174	Q9DBM2	Amacr	Ehhadh	0.698114	Matrix~Unknown
O09174	Q9DCS3	Amacr	Mecr	0.686074	Matrix~Matrix
O09174	Q9DCV6	Amacr	Dele1	0.700577	Matrix~IMM
O09174	Q9JIY5	Amacr	Htra2	0.795512	Matrix~IMM
O09174	Q9QYR9	Amacr	Acot2	0.925608	Matrix~Matrix
O09174	Q9WTP7	Amacr	Ak3	0.747799	Matrix~Matrix
O09174	Q9WUR2	Amacr	Eci2	0.840867	Matrix~Matrix
O09174	Q9WVL0	Amacr	Gstz1	0.906693	Matrix~Matrix
O09174	Q9Z2I8	Amacr	Suclg2	0.716262	Matrix~Matrix
O09174	Q9Z2Y8	Amacr	Plpbp	0.891131	Matrix~Matrix
O35129	O70337	Phb2	Bik	0.721587	IMM~OMM
O35129	O88741	Phb2	Gdap1	0.823096	IMM~OMM
O35129	P00158	Phb2	mt-Cytb	0.763864	IMM~IMM
O35129	P05132	Phb2	Prkaca	0.780326	IMM~IMM
O35129	P35487	Phb2	Pdha2	0.678485	IMM~Matrix
O35129	P41216	Phb2	Acsl1	0.645926	IMM~OMM
O35129	P50544	Phb2	Acadvl	0.806222	IMM~IMM
O35129	P56135	Phb2	Atp5j2	0.713461	IMM~IMM
O35129	P63030	Phb2	Mpc1	0.872178	IMM~IMM
O35129	P67778	Phb2	Phb	0.913183	IMM~IMM
O35129	P97478	Phb2	Coq7	0.680509	IMM~IMM
O35129	P97784	Phb2	Cry1	0.699008	IMM~Unknown
O35129	Q14DH7	Phb2	Acss3	0.670618	IMM~Matrix
O35129	Q3TBW2	Phb2	Mrpl10	0.785057	IMM~Matrix
O35129	Q3UHB1	Phb2	Nt5dc3	0.712185	IMM~Matrix
O35129	Q5SUC9	Phb2	Sco1	0.782942	IMM~IMM
O35129	Q5U458	Phb2	Dnajc11	0.660324	IMM~OMM
O35129	Q60597	Phb2	Ogdh	0.712525	IMM~Matrix
O35129	Q62425	Phb2	Ndufa4	0.861208	IMM~IMM
O35129	Q64445	Phb2	Cox8a	0.714796	IMM~IMM
O35129	Q64521	Phb2	Gpd2	0.769241	IMM~IMM
O35129	Q6NVE9	Phb2	Pptc7	0.674674	IMM~Matrix
O35129	Q7TMF3	Phb2	Ndufa12	0.73586	IMM~IMM
O35129	Q7TNE1	Phb2	Sugct	0.642189	IMM~Matrix
O35129	Q7TSQ8	Phb2	Pdpr	0.831514	IMM~Matrix
O35129	Q80V03	Phb2	Adck5	0.880886	IMM~Unknown
O35129	Q80VL1	Phb2	Tdrkh	0.642788	IMM~Membrane
O35129	Q8BH59	Phb2	Slc25a12	0.936006	IMM~IMM
O35129	Q8BHG1	Phb2	Nrd1	0.784484	IMM~Matrix
O35129	Q8BK30	Phb2	Ndufv3	0.802246	IMM~IMM
O35129	Q8BMF4	Phb2	Dlat	0.65918	IMM~Matrix
O35129	Q8C163	Phb2	Exog	0.793066	IMM~IMM
O35129	Q8C167	Phb2	Prepl	0.77069	IMM~Matrix
O35129	Q8C5H8	Phb2	Nadk2	0.669706	IMM~Matrix
O35129	Q8CC21	Phb2	Ttc19	0.805814	IMM~IMM
O35129	Q8JZN5	Phb2	Acad9	0.818424	IMM~IMM
O35129	Q8JZS9	Phb2	Mrpl48	0.82694	IMM~Matrix
O35129	Q8K1R3	Phb2	Pnpt1	0.824315	IMM~Matrix|IMS
O35129	Q8K3J1	Phb2	Ndufs8	0.774038	IMM~IMM
O35129	Q8R086	Phb2	Suox	0.891007	IMM~IMS
O35129	Q8R0Y6	Phb2	Aldh1l1	0.680764	IMM~Matrix
O35129	Q8R3J4	Phb2	Mterf3	0.655001	IMM~Matrix
O35129	Q8VCX5	Phb2	Micu1	0.736436	IMM~IMM
O35129	Q8VE22	Phb2	Mrps23	0.658417	IMM~Matrix
O35129	Q8VEM8	Phb2	Slc25a3	0.798798	IMM~IMM
O35129	Q91V61	Phb2	Sfxn3	0.697388	IMM~IMM
O35129	Q91VD9	Phb2	Ndufs1	0.761808	IMM~IMM
O35129	Q91WC3	Phb2	Acsl6	0.716785	IMM~OMM
O35129	Q91WD5	Phb2	Ndufs2	0.722583	IMM~IMM
O35129	Q91WK5	Phb2	Gcsh	0.869811	IMM~Matrix
O35129	Q91YT0	Phb2	Ndufv1	0.917269	IMM~IMM
O35129	Q920E5	Phb2	Fdps	0.647467	IMM~IMM
O35129	Q922Q1	Phb2	Mtarc2	0.683396	IMM~OMM
O35129	Q922Q4	Phb2	Pycr2	0.745501	IMM~Matrix
O35129	Q99J39	Phb2	Mlycd	0.674638	IMM~Matrix
O35129	Q99JR1	Phb2	Sfxn1	0.764274	IMM~IMM
O35129	Q99KE1	Phb2	Me2	0.705025	IMM~Matrix
O35129	Q99LY9	Phb2	Ndufs5	0.897982	IMM~IMM
O35129	Q99N92	Phb2	Mrpl27	0.77068	IMM~Matrix
O35129	Q9CPQ8	Phb2	Atp5l	0.869823	IMM~IMM
O35129	Q9CPX8	Phb2	Uqcr11	0.88787	IMM~IMM
O35129	Q9CQ54	Phb2	Ndufc2	0.878612	IMM~IMM
O35129	Q9CQC7	Phb2	Ndufb4	0.702411	IMM~IMM
O35129	Q9CQH3	Phb2	Ndufb5	0.666351	IMM~IMM
O35129	Q9CQJ8	Phb2	Ndufb9	0.812816	IMM~IMM
O35129	Q9CQN1	Phb2	Trap1	0.695042	IMM~Matrix
O35129	Q9CQT9	Phb2	Rab5if	0.640192	IMM~IMM
O35129	Q9CQV1	Phb2	Pam16	0.704209	IMM~IMM
O35129	Q9CQV7	Phb2	Dnajc19	0.771365	IMM~IMM
O35129	Q9CQZ5	Phb2	Ndufa6	0.711688	IMM~IMM
O35129	Q9CQZ6	Phb2	Ndufb3	0.745986	IMM~IMM
O35129	Q9CXZ1	Phb2	Ndufs4	0.680149	IMM~IMM
O35129	Q9CYH2	Phb2	Prxl2a	0.642639	IMM~Membrane
O35129	Q9CZP5	Phb2	Bcs1l	0.762396	IMM~IMM
O35129	Q9D173	Phb2	Tomm7	0.735719	IMM~OMM
O35129	Q9D2R6	Phb2	Coa3	0.737189	IMM~IMM
O35129	Q9D880	Phb2	Timm50	0.813701	IMM~IMM
O35129	Q9DB10	Phb2	Smdt1	0.688962	IMM~IMM
O35129	Q9DB41	Phb2	Slc25a18	0.703283	IMM~IMM
O35129	Q9DC69	Phb2	Ndufa9	0.850545	IMM~IMM
O35129	Q9DC70	Phb2	Ndufs7	0.824618	IMM~IMM
O35129	Q9DCC8	Phb2	Tomm20	0.730489	IMM~OMM
O35129	Q9DCJ5	Phb2	Ndufa8	0.741321	IMM~IMM
O35129	Q9DCS9	Phb2	Ndufb10	0.817742	IMM~IMM
O35129	Q9DCT2	Phb2	Ndufs3	0.880831	IMM~IMM
O35129	Q9DCZ4	Phb2	Apoo	0.644869	IMM~IMM
O35129	Q9Z1P6	Phb2	Ndufa7	0.812454	IMM~IMM
O35143	Q8C196	Atpif1	Cps1	0.662217	Matrix~Matrix
O35143	Q9DCJ7	Atpif1	Aurkaip1	0.677498	Matrix~Matrix
O35143	Q9JIK9	Atpif1	Mrps34	0.678177	Matrix~Matrix
O35435	O88696	Dhodh	Clpp	0.754633	IMM~Matrix
O35435	O88845	Dhodh	Akap10	0.773672	IMM~OMM
O35435	P05132	Dhodh	Prkaca	0.733472	IMM~IMM
O35435	P09528	Dhodh	Fth1	0.766554	IMM~Unknown
O35435	P16125	Dhodh	Ldhb	0.709903	IMM~Unknown
O35435	P16332	Dhodh	Mmut	0.676479	IMM~Matrix
O35435	P19096	Dhodh	Fasn	0.73494	IMM~IMS
O35435	P20108	Dhodh	Prdx3	0.820739	IMM~Matrix
O35435	P28661	Dhodh	Septin4	0.784754	IMM~OMM
O35435	P29758	Dhodh	Oat	0.641571	IMM~Matrix
O35435	P30275	Dhodh	Ckmt1	0.644686	IMM~IMM
O35435	P41216	Dhodh	Acsl1	0.823743	IMM~OMM
O35435	P51660	Dhodh	Hsd17b4	0.693546	IMM~Unknown
O35435	P51881	Dhodh	Slc25a5	0.792425	IMM~IMM
O35435	P54116	Dhodh	Stom	0.847277	IMM~Membrane
O35435	P56382	Dhodh	Atp5e	0.750398	IMM~IMM
O35435	P56391	Dhodh	Cox6b1	0.695372	IMM~IMM
O35435	P58281	Dhodh	Opa1	0.731013	IMM~IMM
O35435	P61922	Dhodh	Abat	0.73754	IMM~Matrix
O35435	P62073	Dhodh	Timm10	0.831951	IMM~IMM
O35435	P62075	Dhodh	Timm13	0.81879	IMM~IMM
O35435	P62077	Dhodh	Timm8b	0.835775	IMM~IMM
O35435	P97493	Dhodh	Txn2	0.69029	IMM~Matrix
O35435	P99028	Dhodh	Uqcrh	0.681181	IMM~IMM
O35435	Q06185	Dhodh	Atp5k	0.728768	IMM~IMM
O35435	Q07417	Dhodh	Acads	0.820887	IMM~Matrix
O35435	Q3UHB1	Dhodh	Nt5dc3	0.716737	IMM~Matrix
O35435	Q3URE1	Dhodh	Acsf3	0.842385	IMM~Matrix
O35435	Q3V3R1	Dhodh	Mthfd1l	0.851626	IMM~Matrix
O35435	Q571F8	Dhodh	Gls2	0.859892	IMM~Matrix
O35435	Q59J78	Dhodh	Ndufaf2	0.815488	IMM~IMM
O35435	Q5M8N4	Dhodh	Sdr39u1	0.717207	IMM~Unknown
O35435	Q5SV80	Dhodh	Myo19	0.813138	IMM~OMM
O35435	Q60759	Dhodh	Gcdh	0.899818	IMM~Matrix
O35435	Q61171	Dhodh	Prdx2	0.644133	IMM~Unknown
O35435	Q62425	Dhodh	Ndufa4	0.767222	IMM~IMM
O35435	Q64133	Dhodh	Maoa	0.663974	IMM~OMM
O35435	Q78IK4	Dhodh	Apool	0.862011	IMM~IMM
O35435	Q80SW1	Dhodh	Ahcyl1	0.729584	IMM~OMM
O35435	Q80XN0	Dhodh	Bdh1	0.82029	IMM~IMM
O35435	Q80Y14	Dhodh	Glrx5	0.878043	IMM~Matrix
O35435	Q8BGY7	Dhodh	Fam210a	0.891127	IMM~IMM
O35435	Q8BH59	Dhodh	Slc25a12	0.693578	IMM~IMM
O35435	Q8BH95	Dhodh	Echs1	0.760341	IMM~Matrix
O35435	Q8BIP0	Dhodh	Dars2	0.797966	IMM~Matrix
O35435	Q8BKZ9	Dhodh	Pdhx	0.855903	IMM~Matrix
O35435	Q8BMF3	Dhodh	Me3	0.754745	IMM~Matrix
O35435	Q8BMS1	Dhodh	Hadha	0.687183	IMM~IMM
O35435	Q8BVI4	Dhodh	Qdpr	0.663457	IMM~Matrix
O35435	Q8BW75	Dhodh	Maob	0.700463	IMM~OMM
O35435	Q8BX10	Dhodh	Pgam5	0.816164	IMM~OMM
O35435	Q8BYL4	Dhodh	Yars2	0.829423	IMM~Matrix
O35435	Q8BYM8	Dhodh	Cars2	0.769835	IMM~Matrix
O35435	Q8CGK3	Dhodh	Lonp1	0.861326	IMM~Matrix
O35435	Q8JZN5	Dhodh	Acad9	0.740133	IMM~IMM
O35435	Q8K1M6	Dhodh	Dnm1l	0.795033	IMM~OMM
O35435	Q8K354	Dhodh	Cbr3	0.678316	IMM~Matrix
O35435	Q8QZT1	Dhodh	Acat1	0.679711	IMM~Matrix
O35435	Q8R3F5	Dhodh	Mcat	0.83897	IMM~Matrix
O35435	Q8VC19	Dhodh	Alas1	0.814385	IMM~Matrix
O35435	Q8VEM8	Dhodh	Slc25a3	0.739278	IMM~IMM
O35435	Q91XF0	Dhodh	Pnpo	0.755482	IMM~Matrix
O35435	Q91XL9	Dhodh	Osbpl1a	0.90466	IMM~Unknown
O35435	Q91YP0	Dhodh	L2hgdh	0.707959	IMM~IMM
O35435	Q922H2	Dhodh	Pdk3	0.741632	IMM~Matrix
O35435	Q922Q4	Dhodh	Pycr2	0.817238	IMM~Matrix
O35435	Q99J39	Dhodh	Mlycd	0.830105	IMM~Matrix
O35435	Q99JR1	Dhodh	Sfxn1	0.679692	IMM~IMM
O35435	Q99JY0	Dhodh	Hadhb	0.828077	IMM~IMM
O35435	Q99KE1	Dhodh	Me2	0.726262	IMM~Matrix
O35435	Q99L04	Dhodh	Dhrs1	0.821915	IMM~IMM
O35435	Q99L13	Dhodh	Hibadh	0.762318	IMM~Matrix
O35435	Q99LP6	Dhodh	Grpel1	0.711326	IMM~Matrix
O35435	Q99LY9	Dhodh	Ndufs5	0.756897	IMM~IMM
O35435	Q99MN1	Dhodh	Kars	0.875373	IMM~Matrix
O35435	Q9CPQ8	Dhodh	Atp5l	0.657016	IMM~IMM
O35435	Q9CPS6	Dhodh	Hint3	0.707283	IMM~Unknown
O35435	Q9CPX8	Dhodh	Uqcr11	0.779042	IMM~IMM
O35435	Q9CPY7	Dhodh	Lap3	0.81211	IMM~Matrix
O35435	Q9CQ62	Dhodh	Decr1	0.673398	IMM~Matrix
O35435	Q9CQN7	Dhodh	Mrpl41	0.796175	IMM~Matrix
O35435	Q9CQQ7	Dhodh	Atp5pb	0.699193	IMM~IMM
O35435	Q9CQX8	Dhodh	Mrps36	0.76665	IMM~Matrix
O35435	Q9CQY6	Dhodh	Uqcc2	0.78067	IMM~IMM
O35435	Q9CR68	Dhodh	Uqcrfs1	0.698921	IMM~IMM
O35435	Q9CWU6	Dhodh	Uqcc1	0.816383	IMM~IMM
O35435	Q9CZD3	Dhodh	Gars	0.934109	IMM~Matrix
O35435	Q9CZR8	Dhodh	Tsfm	0.854817	IMM~Matrix
O35435	Q9CZS1	Dhodh	Aldh1b1	0.840708	IMM~Matrix
O35435	Q9CZU6	Dhodh	Cs	0.661288	IMM~Matrix
O35435	Q9CZW5	Dhodh	Tomm70a	0.828653	IMM~OMM
O35435	Q9D3D9	Dhodh	Atp5d	0.740502	IMM~IMM
O35435	Q9D404	Dhodh	Oxsm	0.762839	IMM~Matrix
O35435	Q9D6K8	Dhodh	Fundc2	0.787725	IMM~OMM
O35435	Q9D6U8	Dhodh	Fam162a	0.835336	IMM~IMM
O35435	Q9D799	Dhodh	Mtfmt	0.711293	IMM~Matrix
O35435	Q9D9V3	Dhodh	Echdc1	0.912596	IMM~Unknown
O35435	Q9DA03	Dhodh	Lyrm7	0.900365	IMM~Matrix
O35435	Q9DBF1	Dhodh	Aldh7a1	0.893032	IMM~Matrix
O35435	Q9DC61	Dhodh	Pmpca	0.814893	IMM~Matrix
O35435	Q9DCV6	Dhodh	Dele1	0.761129	IMM~IMM
O35435	Q9DCW4	Dhodh	Etfb	0.718456	IMM~Matrix
O35435	Q9DCZ4	Dhodh	Apoo	0.846849	IMM~IMM
O35435	Q9EQ80	Dhodh	Nif3l1	0.809197	IMM~Matrix
O35435	Q9ERB0	Dhodh	Snap29	0.80886	IMM~IMS
O35435	Q9JLJ2	Dhodh	Aldh9a1	0.702189	IMM~Matrix
O35435	Q9JLZ3	Dhodh	Auh	0.847396	IMM~Matrix
O35435	Q9WV98	Dhodh	Timm9	0.719859	IMM~IMM
O35435	Q9WVA2	Dhodh	Timm8a1	0.848867	IMM~IMM
O35435	Q9Z2I0	Dhodh	Letm1	0.743916	IMM~IMM
O35459	P20108	Ech1	Prdx3	0.694924	Matrix~Matrix
O35459	P28352	Ech1	Apex1	0.805546	Matrix~Matrix
O35459	P38060	Ech1	Hmgcl	0.778352	Matrix~Matrix
O35459	P47934	Ech1	Crat	0.663139	Matrix~IMM
O35459	P50171	Ech1	H2-Ke6	0.727273	Matrix~Matrix
O35459	P52825	Ech1	Cpt2	0.789177	Matrix~IMM
O35459	P54071	Ech1	Idh2	0.708014	Matrix~Matrix
O35459	P54116	Ech1	Stom	0.80402	Matrix~Membrane
O35459	P56380	Ech1	Nudt2	0.749668	Matrix~Matrix
O35459	P62073	Ech1	Timm10	0.77239	Matrix~IMM
O35459	P70349	Ech1	Hint1	0.755378	Matrix~Unknown
O35459	P84084	Ech1	Arf5	0.782924	Matrix~Unknown
O35459	Q14DH7	Ech1	Acss3	0.664198	Matrix~Matrix
O35459	Q3TC72	Ech1	Fahd2a	0.651117	Matrix~Matrix
O35459	Q3UNZ8	Ech1	Cryzl2	0.699037	Matrix~Matrix
O35459	Q3UUI3	Ech1	Them4	0.723927	Matrix~IMM
O35459	Q3V132	Ech1	Slc25a31	0.841808	Matrix~IMM
O35459	Q3V3R1	Ech1	Mthfd1l	0.668615	Matrix~Matrix
O35459	Q4VAE3	Ech1	Tmem65	0.689118	Matrix~IMM
O35459	Q60759	Ech1	Gcdh	0.69985	Matrix~Matrix
O35459	Q61171	Ech1	Prdx2	0.661577	Matrix~Unknown
O35459	Q6P8J7	Ech1	Ckmt2	0.821357	Matrix~IMM
O35459	Q80XL6	Ech1	Acad11	0.653599	Matrix~IMM
O35459	Q80Y14	Ech1	Glrx5	0.716973	Matrix~Matrix
O35459	Q8BFR5	Ech1	Tufm	0.690105	Matrix~Matrix
O35459	Q8BMS1	Ech1	Hadha	0.664263	Matrix~IMM
O35459	Q8BTE0	Ech1	Sdhaf4	0.712867	Matrix~Matrix
O35459	Q8BVU5	Ech1	Nudt9	0.79912	Matrix~Matrix
O35459	Q8BYM8	Ech1	Cars2	0.776146	Matrix~Matrix
O35459	Q8CG76	Ech1	Akr7a5	0.722251	Matrix~Matrix
O35459	Q8CIW5	Ech1	Twnk	0.878233	Matrix~Matrix
O35459	Q8K0Z7	Ech1	Taco1	0.756614	Matrix~Matrix
O35459	Q8K3A0	Ech1	Hscb	0.704207	Matrix~Matrix
O35459	Q8VDC0	Ech1	Lars2	0.886042	Matrix~Matrix
O35459	Q91V61	Ech1	Sfxn3	0.758153	Matrix~IMM
O35459	Q91VA6	Ech1	Poldip2	0.74336	Matrix~Matrix
O35459	Q91Z53	Ech1	Grhpr	0.69303	Matrix~Matrix
O35459	Q99KE1	Ech1	Me2	0.711655	Matrix~Matrix
O35459	Q99LB2	Ech1	Dhrs4	0.660661	Matrix~Matrix
O35459	Q99LC5	Ech1	Etfa	0.671612	Matrix~Matrix
O35459	Q99LP6	Ech1	Grpel1	0.672809	Matrix~Matrix
O35459	Q99LY9	Ech1	Ndufs5	0.727063	Matrix~IMM
O35459	Q9CPS6	Ech1	Hint3	0.793033	Matrix~Unknown
O35459	Q9CPV4	Ech1	Glod4	0.702707	Matrix~Matrix
O35459	Q9CPW2	Ech1	Fdx2	0.706754	Matrix~Matrix
O35459	Q9CPX8	Ech1	Uqcr11	0.73786	Matrix~IMM
O35459	Q9CQ62	Ech1	Decr1	0.674098	Matrix~Matrix
O35459	Q9CQX8	Ech1	Mrps36	0.737474	Matrix~Matrix
O35459	Q9CY16	Ech1	Mrps28	0.825589	Matrix~Matrix
O35459	Q9CYR0	Ech1	Ssbp1	0.690071	Matrix~Matrix
O35459	Q9D0D3	Ech1	Mtpap	0.832066	Matrix~Matrix
O35459	Q9D113	Ech1	Dnlz	0.851387	Matrix~Matrix
O35459	Q9D1I5	Ech1	Mcee	0.665004	Matrix~Matrix
O35459	Q9DB15	Ech1	Mrpl12	0.745626	Matrix~Matrix
O35459	Q9DBF1	Ech1	Aldh7a1	0.691832	Matrix~Matrix
O35459	Q9DBL1	Ech1	Acadsb	0.774711	Matrix~Matrix
O35459	Q9DCM0	Ech1	Ethe1	0.703852	Matrix~Matrix
O35459	Q9DCS3	Ech1	Mecr	0.775145	Matrix~Matrix
O35459	Q9DCV6	Ech1	Dele1	0.642826	Matrix~IMM
O35459	Q9DCW4	Ech1	Etfb	0.699381	Matrix~Matrix
O35459	Q9DCZ4	Ech1	Apoo	0.677093	Matrix~IMM
O35459	Q9JHI5	Ech1	Ivd	0.680108	Matrix~Matrix
O35459	Q9JIY5	Ech1	Htra2	0.764946	Matrix~IMM
O35459	Q9JK81	Ech1	Myg1	0.811566	Matrix~Matrix
O35459	Q9JLJ2	Ech1	Aldh9a1	0.726452	Matrix~Matrix
O35459	Q9JLZ3	Ech1	Auh	0.676799	Matrix~Matrix
O35459	Q9WVL0	Ech1	Gstz1	0.748838	Matrix~Matrix
O35459	Q9Z1J3	Ech1	Nfs1	0.796201	Matrix~Matrix
O35459	Q9Z2I8	Ech1	Suclg2	0.789994	Matrix~Matrix
O35459	Q9Z2Y8	Ech1	Plpbp	0.747718	Matrix~Matrix
O35465	O88741	Fkbp8	Gdap1	0.836063	OMM~OMM
O35465	P00158	Fkbp8	mt-Cytb	0.895403	OMM~IMM
O35465	P03930	Fkbp8	mt-Atp8	0.765264	OMM~IMM
O35465	P05132	Fkbp8	Prkaca	0.835151	OMM~IMM
O35465	P09528	Fkbp8	Fth1	0.712235	OMM~Unknown
O35465	P12787	Fkbp8	Cox5a	0.670127	OMM~IMM
O35465	P16125	Fkbp8	Ldhb	0.772453	OMM~Unknown
O35465	P19096	Fkbp8	Fasn	0.800605	OMM~IMS
O35465	P28661	Fkbp8	Septin4	0.914179	OMM~OMM
O35465	P41216	Fkbp8	Acsl1	0.829648	OMM~OMM
O35465	P48771	Fkbp8	Cox7a2	0.735415	OMM~IMM
O35465	P50544	Fkbp8	Acadvl	0.727482	OMM~IMM
O35465	P51881	Fkbp8	Slc25a5	0.765411	OMM~IMM
O35465	P52825	Fkbp8	Cpt2	0.6604	OMM~IMM
O35465	P54116	Fkbp8	Stom	0.817123	OMM~Membrane
O35465	P56135	Fkbp8	Atp5j2	0.880016	OMM~IMM
O35465	P56382	Fkbp8	Atp5e	0.76564	OMM~IMM
O35465	P56391	Fkbp8	Cox6b1	0.687183	OMM~IMM
O35465	P58281	Fkbp8	Opa1	0.740719	OMM~IMM
O35465	P59017	Fkbp8	Bcl2l13	0.697951	OMM~OMM
O35465	P62073	Fkbp8	Timm10	0.816045	OMM~IMM
O35465	P63030	Fkbp8	Mpc1	0.88289	OMM~IMM
O35465	P67778	Fkbp8	Phb	0.836124	OMM~IMM
O35465	P84084	Fkbp8	Arf5	0.698959	OMM~Unknown
O35465	P97450	Fkbp8	Atp5j	0.646051	OMM~IMM
O35465	P97478	Fkbp8	Coq7	0.889324	OMM~IMM
O35465	Q06185	Fkbp8	Atp5k	0.660928	OMM~IMM
O35465	Q3UIU2	Fkbp8	Ndufb6	0.803238	OMM~IMM
O35465	Q3UV70	Fkbp8	Pdp1	0.732817	OMM~IMM
O35465	Q3V132	Fkbp8	Slc25a31	0.805444	OMM~IMM
O35465	Q4KMM3	Fkbp8	Oxr1	0.833794	OMM~OMM
O35465	Q4VAE3	Fkbp8	Tmem65	0.673612	OMM~IMM
O35465	Q59J78	Fkbp8	Ndufaf2	0.720934	OMM~IMM
O35465	Q5U458	Fkbp8	Dnajc11	0.75645	OMM~OMM
O35465	Q60930	Fkbp8	Vdac2	0.872701	OMM~OMM
O35465	Q60931	Fkbp8	Vdac3	0.888691	OMM~OMM
O35465	Q60932	Fkbp8	Vdac1	0.766057	OMM~OMM
O35465	Q61171	Fkbp8	Prdx2	0.880672	OMM~Unknown
O35465	Q61387	Fkbp8	Cox7a2l	0.920784	OMM~IMM
O35465	Q62425	Fkbp8	Ndufa4	0.82123	OMM~IMM
O35465	Q64133	Fkbp8	Maoa	0.758437	OMM~OMM
O35465	Q64445	Fkbp8	Cox8a	0.889474	OMM~IMM
O35465	Q64521	Fkbp8	Gpd2	0.774429	OMM~IMM
O35465	Q78IK2	Fkbp8	Atp5md	0.904607	OMM~IMM
O35465	Q791T5	Fkbp8	Mtch1	0.786234	OMM~OMM
O35465	Q791V5	Fkbp8	Mtch2	0.877811	OMM~OMM
O35465	Q7TMF3	Fkbp8	Ndufa12	0.846337	OMM~IMM
O35465	Q80SW1	Fkbp8	Ahcyl1	0.685764	OMM~OMM
O35465	Q80V03	Fkbp8	Adck5	0.859057	OMM~Unknown
O35465	Q80XN0	Fkbp8	Bdh1	0.698865	OMM~IMM
O35465	Q8BGY7	Fkbp8	Fam210a	0.6909	OMM~IMM
O35465	Q8BH59	Fkbp8	Slc25a12	0.785299	OMM~IMM
O35465	Q8BK30	Fkbp8	Ndufv3	0.868655	OMM~IMM
O35465	Q8BMS1	Fkbp8	Hadha	0.837846	OMM~IMM
O35465	Q8BW75	Fkbp8	Maob	0.938554	OMM~OMM
O35465	Q8C0T9	Fkbp8	Adcy10	0.727144	OMM~Membrane
O35465	Q8JZN5	Fkbp8	Acad9	0.785766	OMM~IMM
O35465	Q8JZQ2	Fkbp8	Afg3l2	0.905193	OMM~IMM
O35465	Q8K1M6	Fkbp8	Dnm1l	0.685021	OMM~OMM
O35465	Q8K1R3	Fkbp8	Pnpt1	0.841776	IMS~OMM
O35465	Q8K1Z0	Fkbp8	Coq9	0.853315	OMM~IMM
O35465	Q8K2B3	Fkbp8	Sdha	0.876169	OMM~IMM
O35465	Q8K3J1	Fkbp8	Ndufs8	0.716973	OMM~IMM
O35465	Q8R086	Fkbp8	Suox	0.819871	OMM~IMS
O35465	Q8R1I1	Fkbp8	Uqcr10	0.655009	OMM~IMM
O35465	Q8VEM8	Fkbp8	Slc25a3	0.776388	OMM~IMM
O35465	Q91V61	Fkbp8	Sfxn3	0.860158	OMM~IMM
O35465	Q91VR2	Fkbp8	Atp5c1	0.715387	OMM~IMM
O35465	Q91WC3	Fkbp8	Acsl6	0.926947	OMM~OMM
O35465	Q91WD5	Fkbp8	Ndufs2	0.747093	OMM~IMM
O35465	Q91WS0	Fkbp8	Cisd1	0.67419	OMM~OMM
O35465	Q91XL9	Fkbp8	Osbpl1a	0.740627	OMM~Unknown
O35465	Q91YT0	Fkbp8	Ndufv1	0.716286	OMM~IMM
O35465	Q921G7	Fkbp8	Etfdh	0.768482	OMM~IMM
O35465	Q922Q1	Fkbp8	Mtarc2	0.831065	OMM~OMM
O35465	Q99JB2	Fkbp8	Stoml2	0.712124	OMM~IMM
O35465	Q99JR1	Fkbp8	Sfxn1	0.847306	OMM~IMM
O35465	Q99L04	Fkbp8	Dhrs1	0.697069	OMM~IMM
O35465	Q99LY9	Fkbp8	Ndufs5	0.909259	OMM~IMM
O35465	Q9CPP6	Fkbp8	Ndufa5	0.742455	OMM~IMM
O35465	Q9CPQ3	Fkbp8	Tomm22	0.84413	OMM~OMM
O35465	Q9CPQ8	Fkbp8	Atp5l	0.800688	OMM~IMM
O35465	Q9CPU2	Fkbp8	Ndufb2	0.782613	OMM~IMM
O35465	Q9CPX8	Fkbp8	Uqcr11	0.901277	OMM~IMM
O35465	Q9CQ54	Fkbp8	Ndufc2	0.79067	OMM~IMM
O35465	Q9CQ75	Fkbp8	Ndufa2	0.672946	OMM~IMM
O35465	Q9CQ91	Fkbp8	Ndufa3	0.817222	OMM~IMM
O35465	Q9CQA3	Fkbp8	Sdhb	0.799539	OMM~IMM
O35465	Q9CQC7	Fkbp8	Ndufb4	0.897007	OMM~IMM
O35465	Q9CQH3	Fkbp8	Ndufb5	0.808614	OMM~IMM
O35465	Q9CQJ8	Fkbp8	Ndufb9	0.729057	OMM~IMM
O35465	Q9CQQ7	Fkbp8	Atp5pb	0.81015	OMM~IMM
O35465	Q9CQT9	Fkbp8	Rab5if	0.913014	OMM~IMM
O35465	Q9CQV1	Fkbp8	Pam16	0.701118	OMM~IMM
O35465	Q9CQZ5	Fkbp8	Ndufa6	0.870687	OMM~IMM
O35465	Q9CQZ6	Fkbp8	Ndufb3	0.793256	OMM~IMM
O35465	Q9CR61	Fkbp8	Ndufb7	0.660622	OMM~IMM
O35465	Q9CR62	Fkbp8	Slc25a11	0.869896	OMM~IMM
O35465	Q9CRD0	Fkbp8	Ociad1	0.663441	OMM~OMM
O35465	Q9CXZ1	Fkbp8	Ndufs4	0.817619	OMM~IMM
O35465	Q9CYH2	Fkbp8	Prxl2a	0.903462	OMM~Membrane
O35465	Q9CZP5	Fkbp8	Bcs1l	0.74044	OMM~IMM
O35465	Q9CZW5	Fkbp8	Tomm70a	0.808504	OMM~OMM
O35465	Q9D023	Fkbp8	Mpc2	0.815339	OMM~IMM
O35465	Q9D3D9	Fkbp8	Atp5d	0.710374	OMM~IMM
O35465	Q9D6J5	Fkbp8	Ndufb8	0.665633	OMM~IMM
O35465	Q9D6J6	Fkbp8	Ndufv2	0.694755	OMM~IMM
O35465	Q9D6M3	Fkbp8	Slc25a22	0.705959	OMM~IMM
O35465	Q9D6U8	Fkbp8	Fam162a	0.74654	OMM~IMM
O35465	Q9D880	Fkbp8	Timm50	0.910306	OMM~IMM
O35465	Q9D8W7	Fkbp8	Ociad2	0.906727	OMM~Unknown
O35465	Q9DB41	Fkbp8	Slc25a18	0.878832	OMM~IMM
O35465	Q9DC70	Fkbp8	Ndufs7	0.872366	OMM~IMM
O35465	Q9DCC8	Fkbp8	Tomm20	0.75074	OMM~OMM
O35465	Q9DCJ5	Fkbp8	Ndufa8	0.762416	OMM~IMM
O35465	Q9DCN2	Fkbp8	Cyb5r3	0.683549	OMM~OMM
O35465	Q9DCV6	Fkbp8	Dele1	0.73918	OMM~IMM
O35465	Q9DCZ4	Fkbp8	Apoo	0.843793	OMM~IMM
O35465	Q9JMH6	Fkbp8	Txnrd1	0.757085	OMM~Unknown
O35465	Q9WV98	Fkbp8	Timm9	0.715899	OMM~IMM
O35465	Q9WVA2	Fkbp8	Timm8a1	0.645141	OMM~IMM
O35465	Q9Z1P6	Fkbp8	Ndufa7	0.649353	OMM~IMM
O35465	Q9Z2I0	Fkbp8	Letm1	0.876905	OMM~IMM
O35855	P11352	Bcat2	Gpx1	0.752504	Matrix~Matrix
O35855	P16125	Bcat2	Ldhb	0.686707	Matrix~Unknown
O35855	P20108	Bcat2	Prdx3	0.778242	Matrix~Matrix
O35855	P28352	Bcat2	Apex1	0.893012	Matrix~Matrix
O35855	P34914	Bcat2	Ephx2	0.73411	Matrix~Unknown
O35855	P38060	Bcat2	Hmgcl	0.930916	Matrix~Matrix
O35855	P47738	Bcat2	Aldh2	0.71896	Matrix~Matrix
O35855	P50171	Bcat2	H2-Ke6	0.878434	Matrix~Matrix
O35855	P51174	Bcat2	Acadl	0.641474	Matrix~IMM
O35855	P52825	Bcat2	Cpt2	0.865939	Matrix~IMM
O35855	P54071	Bcat2	Idh2	0.872106	Matrix~Matrix
O35855	P54116	Bcat2	Stom	0.882763	Matrix~Membrane
O35855	P56380	Bcat2	Nudt2	0.867045	Matrix~Matrix
O35855	P56391	Bcat2	Cox6b1	0.772423	Matrix~IMM
O35855	P62073	Bcat2	Timm10	0.73474	Matrix~IMM
O35855	P70349	Bcat2	Hint1	0.648728	Matrix~Unknown
O35855	P84084	Bcat2	Arf5	0.916163	Matrix~Unknown
O35855	P85094	Bcat2	Isoc2a	0.870379	Matrix~Matrix
O35855	Q3TC72	Bcat2	Fahd2a	0.764494	Matrix~Matrix
O35855	Q3TL44	Bcat2	Nlrx1	0.790551	Matrix~Matrix
O35855	Q3UGX3	Bcat2	Nat8l	0.881935	Matrix~Membrane
O35855	Q3UNZ8	Bcat2	Cryzl2	0.669906	Matrix~Matrix
O35855	Q3UUI3	Bcat2	Them4	0.864314	Matrix~IMM
O35855	Q3V132	Bcat2	Slc25a31	0.889163	Matrix~IMM
O35855	Q5M8N4	Bcat2	Sdr39u1	0.790026	Matrix~Unknown
O35855	Q61171	Bcat2	Prdx2	0.791731	Matrix~Unknown
O35855	Q61425	Bcat2	Hadh	0.861701	Matrix~Matrix
O35855	Q6P8J7	Bcat2	Ckmt2	0.832071	Matrix~IMM
O35855	Q7TMF3	Bcat2	Ndufa12	0.70559	Matrix~IMM
O35855	Q80SX8	Bcat2	Pif1	0.900229	Matrix~Matrix
O35855	Q80XL6	Bcat2	Acad11	0.850211	Matrix~IMM
O35855	Q80Y14	Bcat2	Glrx5	0.82897	Matrix~Matrix
O35855	Q8BGC4	Bcat2	Zadh2	0.773887	Matrix~Unknown
O35855	Q8BH95	Bcat2	Echs1	0.756562	Matrix~Matrix
O35855	Q8BMS1	Bcat2	Hadha	0.814178	Matrix~IMM
O35855	Q8BTE0	Bcat2	Sdhaf4	0.657739	Matrix~Matrix
O35855	Q8BVI4	Bcat2	Qdpr	0.672695	Matrix~Matrix
O35855	Q8BWT1	Bcat2	Acaa2	0.71074	Matrix~Matrix
O35855	Q8BYM8	Bcat2	Cars2	0.850869	Matrix~Matrix
O35855	Q8CAK1	Bcat2	Iba57	0.770586	Matrix~Matrix
O35855	Q8CCT7	Bcat2	Nsun3	0.692652	Matrix~Matrix
O35855	Q8CIW5	Bcat2	Twnk	0.887487	Matrix~Matrix
O35855	Q8K009	Bcat2	Aldh1l2	0.878037	Matrix~Matrix
O35855	Q8K0Z7	Bcat2	Taco1	0.901548	Matrix~Matrix
O35855	Q8K2B3	Bcat2	Sdha	0.678268	Matrix~IMM
O35855	Q8K2C6	Bcat2	Sirt5	0.882534	Matrix~Matrix
O35855	Q8K354	Bcat2	Cbr3	0.695025	Matrix~Matrix
O35855	Q8K3A0	Bcat2	Hscb	0.883321	Matrix~Matrix
O35855	Q8K3J1	Bcat2	Ndufs8	0.709999	Matrix~IMM
O35855	Q8R035	Bcat2	Mrpl58	0.763259	Matrix~Matrix
O35855	Q8R0N6	Bcat2	Adhfe1	0.898087	Matrix~Matrix
O35855	Q8R164	Bcat2	Bphl	0.792986	Matrix~Matrix
O35855	Q8R1I1	Bcat2	Uqcr10	0.671367	Matrix~IMM
O35855	Q8R4H7	Bcat2	Nags	0.834459	Matrix~Matrix
O35855	Q8R4N0	Bcat2	Clybl	0.753148	Matrix~Matrix
O35855	Q8VCW8	Bcat2	Acsf2	0.84227	Matrix~Matrix
O35855	Q8VDC0	Bcat2	Lars2	0.852324	Matrix~Matrix
O35855	Q8VE38	Bcat2	Oxnad1	0.709265	Matrix~Matrix
O35855	Q91VA6	Bcat2	Poldip2	0.905016	Matrix~Matrix
O35855	Q91VT4	Bcat2	Cbr4	0.777029	Matrix~Matrix
O35855	Q91XL9	Bcat2	Osbpl1a	0.76807	Matrix~Unknown
O35855	Q91YP2	Bcat2	Nln	0.649672	Matrix~Matrix
O35855	Q91YT0	Bcat2	Ndufv1	0.723419	Matrix~IMM
O35855	Q91Z53	Bcat2	Grhpr	0.812256	Matrix~Matrix
O35855	Q99JY0	Bcat2	Hadhb	0.819468	Matrix~IMM
O35855	Q99KB8	Bcat2	Hagh	0.715317	Matrix~Matrix
O35855	Q99L04	Bcat2	Dhrs1	0.861228	Matrix~IMM
O35855	Q99LB2	Bcat2	Dhrs4	0.660935	Matrix~Matrix
O35855	Q99LP6	Bcat2	Grpel1	0.695797	Matrix~Matrix
O35855	Q9CPS6	Bcat2	Hint3	0.793253	Matrix~Unknown
O35855	Q9CPX8	Bcat2	Uqcr11	0.82666	Matrix~IMM
O35855	Q9CQR4	Bcat2	Acot13	0.753343	Matrix~Matrix
O35855	Q9CQX8	Bcat2	Mrps36	0.749585	Matrix~Matrix
O35855	Q9CWX4	Bcat2	Rpusd4	0.782165	Matrix~Matrix
O35855	Q9CY16	Bcat2	Mrps28	0.839008	Matrix~Matrix
O35855	Q9D023	Bcat2	Mpc2	0.852714	Matrix~IMM
O35855	Q9D0D3	Bcat2	Mtpap	0.864428	Matrix~Matrix
O35855	Q9D113	Bcat2	Dnlz	0.870902	Matrix~Matrix
O35855	Q9D1I5	Bcat2	Mcee	0.833575	Matrix~Matrix
O35855	Q9D8S4	Bcat2	Rexo2	0.648014	Matrix~Matrix
O35855	Q9DB15	Bcat2	Mrpl12	0.837178	Matrix~Matrix
O35855	Q9DBF1	Bcat2	Aldh7a1	0.71176	Matrix~Matrix
O35855	Q9DCB8	Bcat2	Isca2	0.774176	Matrix~Matrix
O35855	Q9DCM0	Bcat2	Ethe1	0.733983	Matrix~Matrix
O35855	Q9DCS3	Bcat2	Mecr	0.828417	Matrix~Matrix
O35855	Q9DCV6	Bcat2	Dele1	0.791486	Matrix~IMM
O35855	Q9DCW4	Bcat2	Etfb	0.752276	Matrix~Matrix
O35855	Q9DCZ4	Bcat2	Apoo	0.82562	Matrix~IMM
O35855	Q9JIY5	Bcat2	Htra2	0.714414	Matrix~IMM
O35855	Q9JK81	Bcat2	Myg1	0.855518	Matrix~Matrix
O35855	Q9JLJ2	Bcat2	Aldh9a1	0.680075	Matrix~Matrix
O35855	Q9JLT4	Bcat2	Txnrd2	0.643141	Matrix~Matrix
O35855	Q9JMH6	Bcat2	Txnrd1	0.678069	Matrix~Unknown
O35855	Q9R0X4	Bcat2	Acot9	0.652085	Matrix~IMM
O35855	Q9WUR2	Bcat2	Eci2	0.651411	Matrix~Matrix
O35855	Q9WUR9	Bcat2	Ak4	0.802522	Matrix~Matrix
O35855	Q9WV98	Bcat2	Timm9	0.74181	Matrix~IMM
O35855	Q9WVL0	Bcat2	Gstz1	0.829237	Matrix~Matrix
O35855	Q9Z0X1	Bcat2	Aifm1	0.805383	Matrix~IMM
O35855	Q9Z2I0	Bcat2	Letm1	0.652433	Matrix~IMM
O35855	Q9Z2I8	Bcat2	Suclg2	0.727791	Matrix~Matrix
O35855	Q9Z2Y8	Bcat2	Plpbp	0.829442	Matrix~Matrix
O35857	P30275	Timm44	Ckmt1	0.702596	IMM~IMM
O35857	P38060	Timm44	Hmgcl	0.745443	IMM~Matrix
O35857	P43024	Timm44	Cox6a1	0.690379	IMM~IMM
O35857	P51660	Timm44	Hsd17b4	0.678889	IMM~Unknown
O35857	P56391	Timm44	Cox6b1	0.64712	IMM~IMM
O35857	P62897	Timm44	Cycs	0.644686	IMM~IMS
O35857	P99029	Timm44	Prdx5	0.75467	IMM~Matrix
O35857	Q3UIU2	Timm44	Ndufb6	0.686469	IMM~IMM
O35857	Q60931	Timm44	Vdac3	0.682644	IMM~OMM
O35857	Q64133	Timm44	Maoa	0.643933	IMM~OMM
O35857	Q64445	Timm44	Cox8a	0.673206	IMM~IMM
O35857	Q6P1E7	Timm44	Primpol	0.667982	IMM~Matrix
O35857	Q791V5	Timm44	Mtch2	0.747692	IMM~OMM
O35857	Q80Y14	Timm44	Glrx5	0.660346	IMM~Matrix
O35857	Q8BW75	Timm44	Maob	0.747551	IMM~OMM
O35857	Q8BX10	Timm44	Pgam5	0.706806	IMM~OMM
O35857	Q8JZQ2	Timm44	Afg3l2	0.66727	IMM~IMM
O35857	Q91WC3	Timm44	Acsl6	0.642267	IMM~OMM
O35857	Q91XL9	Timm44	Osbpl1a	0.658989	IMM~Unknown
O35857	Q99JR1	Timm44	Sfxn1	0.666143	IMM~IMM
O35857	Q99KR7	Timm44	Ppif	0.684436	IMM~Matrix
O35857	Q9CPP6	Timm44	Ndufa5	0.664781	IMM~IMM
O35857	Q9CPU4	Timm44	Mgst3	0.664179	IMM~OMM
O35857	Q9CQ92	Timm44	Fis1	0.707895	IMM~OMM
O35857	Q9CQH3	Timm44	Ndufb5	0.714988	IMM~IMM
O35857	Q9CQX2	Timm44	Cyb5b	0.7414	IMM~OMM
O35857	Q9CR61	Timm44	Ndufb7	0.730425	IMM~IMM
O35857	Q9D172	Timm44	Gatd3a	0.695974	IMM~Matrix
O35857	Q9D1I5	Timm44	Mcee	0.73851	IMM~Matrix
O35857	Q9DCT2	Timm44	Ndufs3	0.757451	IMM~IMM
O35943	Q8VCW8	Fxn	Acsf2	0.664578	Matrix~Matrix
O35943	Q91WK5	Fxn	Gcsh	0.683451	Matrix~Matrix
O35943	Q99LB2	Fxn	Dhrs4	0.658393	Matrix~Matrix
O35943	Q99N87	Fxn	Mrps5	0.713334	Matrix~Matrix
O35943	Q9EQ20	Fxn	Aldh6a1	0.641923	Matrix~IMM
O35972	P12787	Mrpl23	Cox5a	0.703109	Matrix~IMM
O35972	P56391	Mrpl23	Cox6b1	0.652657	Matrix~IMM
O35972	Q8BFR5	Mrpl23	Tufm	0.640143	Matrix~Matrix
O35980	P28352	Nthl1	Apex1	0.782822	Unknown~Matrix
O35980	P32020	Nthl1	Scp2	0.659069	Unknown~IMM
O35980	P38060	Nthl1	Hmgcl	0.847937	Unknown~Matrix
O35980	P38647	Nthl1	Hspa9	0.672023	Unknown~Matrix
O35980	P47199	Nthl1	Cryz	0.692909	Unknown~Matrix
O35980	P48962	Nthl1	Slc25a4	0.685728	Unknown~IMM
O35980	P50171	Nthl1	H2-Ke6	0.705344	Unknown~Matrix
O35980	P52196	Nthl1	Tst	0.827727	Unknown~Matrix
O35980	P52825	Nthl1	Cpt2	0.708096	Unknown~IMM
O35980	P56391	Nthl1	Cox6b1	0.753936	Unknown~IMM
O35980	P58044	Nthl1	Idi1	0.774556	Unknown~Matrix
O35980	P62073	Nthl1	Timm10	0.760517	Unknown~IMM
O35980	P62075	Nthl1	Timm13	0.84147	Unknown~IMM
O35980	P62897	Nthl1	Cycs	0.763281	Unknown~IMS
O35980	P85094	Nthl1	Isoc2a	0.643899	Unknown~Matrix
O35980	P99029	Nthl1	Prdx5	0.645763	Unknown~Matrix
O35980	Q3UUI3	Nthl1	Them4	0.669365	Unknown~IMM
O35980	Q5SWU9	Nthl1	Acaca	0.747656	Unknown~Matrix
O35980	Q61578	Nthl1	Fdxr	0.685858	Unknown~Matrix
O35980	Q6P8J7	Nthl1	Ckmt2	0.809747	Unknown~IMM
O35980	Q6PCP5	Nthl1	Mff	0.825265	Unknown~OMM
O35980	Q7TMV3	Nthl1	Fastkd5	0.81261	Unknown~Matrix
O35980	Q80UN9	Nthl1	Trit1	0.81516	Unknown~Matrix
O35980	Q8BGC4	Nthl1	Zadh2	0.782598	Unknown~Unknown
O35980	Q8BGD8	Nthl1	Coa6	0.792577	Unknown~IMS
O35980	Q8BH95	Nthl1	Echs1	0.68991	Unknown~Matrix
O35980	Q8BWT1	Nthl1	Acaa2	0.696098	Unknown~Matrix
O35980	Q8BYM8	Nthl1	Cars2	0.855847	Unknown~Matrix
O35980	Q8C0T9	Nthl1	Adcy10	0.866789	Unknown~Membrane
O35980	Q8CAK1	Nthl1	Iba57	0.794002	Unknown~Matrix
O35980	Q8CHT0	Nthl1	Aldh4a1	0.763377	Unknown~Matrix
O35980	Q8K2C6	Nthl1	Sirt5	0.817855	Unknown~Matrix
O35980	Q8R0F8	Nthl1	Fahd1	0.804725	Unknown~Matrix
O35980	Q8R3J4	Nthl1	Mterf3	0.768143	Unknown~Matrix
O35980	Q8R4N0	Nthl1	Clybl	0.812783	Unknown~Matrix
O35980	Q8VCE6	Nthl1	Nt5m	0.694044	Unknown~Matrix
O35980	Q8VCH0	Nthl1	Acaa1b	0.714878	Unknown~Unknown
O35980	Q8VE95	Nthl1	C030006K11Rik	0.846545	Unknown~Matrix
O35980	Q91VT4	Nthl1	Cbr4	0.810931	Unknown~Matrix
O35980	Q91XL9	Nthl1	Osbpl1a	0.883337	Unknown~Unknown
O35980	Q921H8	Nthl1	Acaa1a	0.723699	Unknown~Matrix
O35980	Q99KB8	Nthl1	Hagh	0.782973	Unknown~Matrix
O35980	Q99LB2	Nthl1	Dhrs4	0.660748	Unknown~Matrix
O35980	Q99NB1	Nthl1	Acss1	0.769246	Unknown~IMM
O35980	Q9CPY7	Nthl1	Lap3	0.781702	Unknown~Matrix
O35980	Q9CQ62	Nthl1	Decr1	0.708923	Unknown~Matrix
O35980	Q9CQR4	Nthl1	Acot13	0.704452	Unknown~Matrix
O35980	Q9CQV1	Nthl1	Pam16	0.848807	Unknown~IMM
O35980	Q9CR98	Nthl1	Fam136a	0.688639	Unknown~IMS
O35980	Q9CY16	Nthl1	Mrps28	0.862756	Unknown~Matrix
O35980	Q9D0M3	Nthl1	Cyc1	0.788712	Unknown~IMM
O35980	Q9D1I5	Nthl1	Mcee	0.66738	Unknown~Matrix
O35980	Q9D3D9	Nthl1	Atp5d	0.729693	Unknown~IMM
O35980	Q9D6S7	Nthl1	Mrrf	0.799979	Unknown~Matrix
O35980	Q9D799	Nthl1	Mtfmt	0.846314	Unknown~Matrix
O35980	Q9D8Z2	Nthl1	Triap1	0.832379	Unknown~IMS
O35980	Q9DB15	Nthl1	Mrpl12	0.73426	Unknown~Matrix
O35980	Q9DCM2	Nthl1	Gstk1	0.817297	Unknown~Matrix
O35980	Q9DCN2	Nthl1	Cyb5r3	0.695493	Unknown~OMM
O35980	Q9DCS3	Nthl1	Mecr	0.644238	Unknown~Matrix
O35980	Q9DCV6	Nthl1	Dele1	0.804695	Unknown~IMM
O35980	Q9ERI6	Nthl1	Rdh14	0.81516	Unknown~Membrane
O35980	Q9JHW2	Nthl1	Nit2	0.799382	Unknown~Unknown
O35980	Q9JIY5	Nthl1	Htra2	0.725116	Unknown~IMM
O35980	Q9JLJ2	Nthl1	Aldh9a1	0.773721	Unknown~Matrix
O35980	Q9WTP6	Nthl1	Ak2	0.690902	Unknown~IMS
O35980	Q9WTP7	Nthl1	Ak3	0.759404	Unknown~Matrix
O35980	Q9WUR2	Nthl1	Eci2	0.751978	Unknown~Matrix
O35980	Q9WV98	Nthl1	Timm9	0.745112	Unknown~IMM
O35980	Q9WVL0	Nthl1	Gstz1	0.687554	Unknown~Matrix
O35980	Q9Z2I8	Nthl1	Suclg2	0.71916	Unknown~Matrix
O55125	P40630	Nipsnap1	Tfam	0.697708	Matrix~Matrix
O55125	P51174	Nipsnap1	Acadl	0.769739	Matrix~IMM
O55125	P56382	Nipsnap1	Atp5e	0.671817	Matrix~IMM
O55125	P62077	Nipsnap1	Timm8b	0.672634	Matrix~IMM
O55125	P97493	Nipsnap1	Txn2	0.700697	Matrix~Matrix
O55125	Q07417	Nipsnap1	Acads	0.730646	Matrix~Matrix
O55125	Q3UIU2	Nipsnap1	Ndufb6	0.766019	Matrix~IMM
O55125	Q3V3R1	Nipsnap1	Mthfd1l	0.674099	Matrix~Matrix
O55125	Q4VAE3	Nipsnap1	Tmem65	0.725781	Matrix~IMM
O55125	Q571F8	Nipsnap1	Gls2	0.682313	Matrix~Matrix
O55125	Q59J78	Nipsnap1	Ndufaf2	0.719378	Matrix~IMM
O55125	Q60597	Nipsnap1	Ogdh	0.706259	Matrix~Matrix
O55125	Q60759	Nipsnap1	Gcdh	0.724397	Matrix~Matrix
O55125	Q62425	Nipsnap1	Ndufa4	0.678353	Matrix~IMM
O55125	Q64521	Nipsnap1	Gpd2	0.758231	Matrix~IMM
O55125	Q78IK4	Nipsnap1	Apool	0.66874	Matrix~IMM
O55125	Q80Y81	Nipsnap1	Elac2	0.646838	Matrix~Matrix
O55125	Q8BGY7	Nipsnap1	Fam210a	0.684653	Matrix~IMM
O55125	Q8BIJ6	Nipsnap1	Iars2	0.7124	Matrix~Matrix
O55125	Q8K2B3	Nipsnap1	Sdha	0.787958	Matrix~IMM
O55125	Q8VC19	Nipsnap1	Alas1	0.669848	Matrix~Matrix
O55125	Q8VDK1	Nipsnap1	Nit1	0.713382	Matrix~Matrix
O55125	Q8VEM8	Nipsnap1	Slc25a3	0.741414	Matrix~IMM
O55125	Q91V92	Nipsnap1	Acly	0.716258	Matrix~Matrix
O55125	Q91VR2	Nipsnap1	Atp5c1	0.683412	Matrix~IMM
O55125	Q91YP0	Nipsnap1	L2hgdh	0.685716	Matrix~IMM
O55125	Q922H2	Nipsnap1	Pdk3	0.7034	Matrix~Matrix
O55125	Q922Q4	Nipsnap1	Pycr2	0.665067	Matrix~Matrix
O55125	Q99LC3	Nipsnap1	Ndufa10	0.658385	Matrix~IMM
O55125	Q99MN9	Nipsnap1	Pccb	0.702489	Matrix~Matrix
O55125	Q9CPQ8	Nipsnap1	Atp5l	0.805449	Matrix~IMM
O55125	Q9CPX8	Nipsnap1	Uqcr11	0.732975	Matrix~IMM
O55125	Q9CQ54	Nipsnap1	Ndufc2	0.685743	Matrix~IMM
O55125	Q9CQ85	Nipsnap1	Timm22	0.765474	Matrix~IMM
O55125	Q9CQA3	Nipsnap1	Sdhb	0.753638	Matrix~IMM
O55125	Q9CQY6	Nipsnap1	Uqcc2	0.710803	Matrix~IMM
O55125	Q9CR61	Nipsnap1	Ndufb7	0.832039	Matrix~IMM
O55125	Q9CZ42	Nipsnap1	Naxd	0.689066	Matrix~IMM
O55125	Q9CZD3	Nipsnap1	Gars	0.67243	Matrix~Matrix
O55125	Q9CZS1	Nipsnap1	Aldh1b1	0.675252	Matrix~Matrix
O55125	Q9D404	Nipsnap1	Oxsm	0.712815	Matrix~Matrix
O55125	Q9D9V3	Nipsnap1	Echdc1	0.674833	Matrix~Unknown
O55125	Q9DA03	Nipsnap1	Lyrm7	0.64905	Matrix~Matrix
O55125	Q9DBL1	Nipsnap1	Acadsb	0.765732	Matrix~Matrix
O55125	Q9DC61	Nipsnap1	Pmpca	0.746646	Matrix~Matrix
O55125	Q9EQ80	Nipsnap1	Nif3l1	0.739322	Matrix~Matrix
O55125	Q9JMH6	Nipsnap1	Txnrd1	0.736748	Matrix~Unknown
O70157	Q8CG76	Top3a	Akr7a5	0.721077	Matrix~Matrix
O70157	Q99LB2	Top3a	Dhrs4	0.692146	Matrix~Matrix
O70337	P03930	Bik	mt-Atp8	0.739686	OMM~IMM
O70337	P05132	Bik	Prkaca	0.807522	OMM~IMM
O70337	P16125	Bik	Ldhb	0.646333	OMM~Unknown
O70337	P19096	Bik	Fasn	0.897405	OMM~IMS
O70337	P28661	Bik	Septin4	0.920134	OMM~OMM
O70337	P41216	Bik	Acsl1	0.676152	OMM~OMM
O70337	P48962	Bik	Slc25a4	0.705536	OMM~IMM
O70337	P51174	Bik	Acadl	0.64987	OMM~IMM
O70337	P51881	Bik	Slc25a5	0.802468	OMM~IMM
O70337	P54116	Bik	Stom	0.749833	OMM~Membrane
O70337	P56135	Bik	Atp5j2	0.76993	OMM~IMM
O70337	P56382	Bik	Atp5e	0.758978	OMM~IMM
O70337	P58281	Bik	Opa1	0.80524	OMM~IMM
O70337	P59017	Bik	Bcl2l13	0.66776	OMM~OMM
O70337	P62073	Bik	Timm10	0.787708	OMM~IMM
O70337	P62075	Bik	Timm13	0.677591	OMM~IMM
O70337	P62077	Bik	Timm8b	0.79012	OMM~IMM
O70337	P63030	Bik	Mpc1	0.6675	OMM~IMM
O70337	P67778	Bik	Phb	0.646861	OMM~IMM
O70337	P97478	Bik	Coq7	0.704312	OMM~IMM
O70337	Q06185	Bik	Atp5k	0.667445	OMM~IMM
O70337	Q3UV70	Bik	Pdp1	0.761254	OMM~IMM
O70337	Q4KMM3	Bik	Oxr1	0.741365	OMM~OMM
O70337	Q4VAE3	Bik	Tmem65	0.811624	OMM~IMM
O70337	Q59J78	Bik	Ndufaf2	0.81763	OMM~IMM
O70337	Q5SV80	Bik	Myo19	0.838493	OMM~OMM
O70337	Q61171	Bik	Prdx2	0.75406	OMM~Unknown
O70337	Q62425	Bik	Ndufa4	0.834068	OMM~IMM
O70337	Q64133	Bik	Maoa	0.64256	OMM~OMM
O70337	Q64521	Bik	Gpd2	0.643448	OMM~IMM
O70337	Q78IK2	Bik	Atp5md	0.763235	OMM~IMM
O70337	Q78IK4	Bik	Apool	0.812641	OMM~IMM
O70337	Q80SW1	Bik	Ahcyl1	0.81187	OMM~OMM
O70337	Q80V03	Bik	Adck5	0.751356	OMM~Unknown
O70337	Q80XN0	Bik	Bdh1	0.780504	OMM~IMM
O70337	Q8BGY7	Bik	Fam210a	0.826733	OMM~IMM
O70337	Q8BH59	Bik	Slc25a12	0.670334	OMM~IMM
O70337	Q8BK30	Bik	Ndufv3	0.730667	OMM~IMM
O70337	Q8BW75	Bik	Maob	0.876449	OMM~OMM
O70337	Q8BX10	Bik	Pgam5	0.78123	OMM~OMM
O70337	Q8JZN5	Bik	Acad9	0.882229	OMM~IMM
O70337	Q8K1Z0	Bik	Coq9	0.657172	OMM~IMM
O70337	Q8K2B3	Bik	Sdha	0.746617	OMM~IMM
O70337	Q8K3J1	Bik	Ndufs8	0.776309	OMM~IMM
O70337	Q8VCH0	Bik	Acaa1b	0.640616	OMM~Unknown
O70337	Q8VCX5	Bik	Micu1	0.778412	OMM~IMM
O70337	Q8VEM8	Bik	Slc25a3	0.651708	OMM~IMM
O70337	Q91V61	Bik	Sfxn3	0.805038	OMM~IMM
O70337	Q91WC3	Bik	Acsl6	0.764028	OMM~OMM
O70337	Q91WD5	Bik	Ndufs2	0.777934	OMM~IMM
O70337	Q91WS0	Bik	Cisd1	0.660098	OMM~OMM
O70337	Q91XL9	Bik	Osbpl1a	0.842082	OMM~Unknown
O70337	Q91YP0	Bik	L2hgdh	0.6508	OMM~IMM
O70337	Q91YT0	Bik	Ndufv1	0.676253	OMM~IMM
O70337	Q99JR1	Bik	Sfxn1	0.835123	OMM~IMM
O70337	Q99JY0	Bik	Hadhb	0.718092	OMM~IMM
O70337	Q99L04	Bik	Dhrs1	0.746287	OMM~IMM
O70337	Q99LY9	Bik	Ndufs5	0.814461	OMM~IMM
O70337	Q9CPP6	Bik	Ndufa5	0.711255	OMM~IMM
O70337	Q9CPX8	Bik	Uqcr11	0.911845	OMM~IMM
O70337	Q9CQ85	Bik	Timm22	0.673746	OMM~IMM
O70337	Q9CQA3	Bik	Sdhb	0.812577	OMM~IMM
O70337	Q9CQY6	Bik	Uqcc2	0.669608	OMM~IMM
O70337	Q9CRA5	Bik	Golph3	0.74536	OMM~IMS
O70337	Q9CRD0	Bik	Ociad1	0.643048	OMM~OMM
O70337	Q9CXZ1	Bik	Ndufs4	0.681544	OMM~IMM
O70337	Q9CYH2	Bik	Prxl2a	0.761999	OMM~Membrane
O70337	Q9CZ42	Bik	Naxd	0.689294	OMM~IMM
O70337	Q9CZP5	Bik	Bcs1l	0.762782	OMM~IMM
O70337	Q9CZW5	Bik	Tomm70a	0.728106	OMM~OMM
O70337	Q9D6K8	Bik	Fundc2	0.858172	OMM~OMM
O70337	Q9D6M3	Bik	Slc25a22	0.726751	OMM~IMM
O70337	Q9D6U8	Bik	Fam162a	0.897543	OMM~IMM
O70337	Q9D880	Bik	Timm50	0.886011	OMM~IMM
O70337	Q9D9V3	Bik	Echdc1	0.762689	OMM~Unknown
O70337	Q9DB41	Bik	Slc25a18	0.764236	OMM~IMM
O70337	Q9DC69	Bik	Ndufa9	0.741248	OMM~IMM
O70337	Q9DC70	Bik	Ndufs7	0.710185	OMM~IMM
O70337	Q9DCT2	Bik	Ndufs3	0.690954	OMM~IMM
O70337	Q9DCV6	Bik	Dele1	0.725919	OMM~IMM
O70337	Q9DCZ4	Bik	Apoo	0.872753	OMM~IMM
O70337	Q9ERB0	Bik	Snap29	0.832775	OMM~IMS
O70337	Q9WV98	Bik	Timm9	0.738175	OMM~IMM
O70337	Q9WVA2	Bik	Timm8a1	0.798517	OMM~IMM
O70337	Q9Z2I0	Bik	Letm1	0.855163	OMM~IMM
O88587	P00158	Comt	mt-Cytb	0.790534	Membrane~IMM
O88587	P03930	Comt	mt-Atp8	0.750488	Membrane~IMM
O88587	P16125	Comt	Ldhb	0.780353	Membrane~Unknown
O88587	P19096	Comt	Fasn	0.704337	Membrane~IMS
O88587	P20108	Comt	Prdx3	0.675726	Membrane~Matrix
O88587	P30275	Comt	Ckmt1	0.647718	Membrane~IMM
O88587	P35487	Comt	Pdha2	0.895419	Membrane~Matrix
O88587	P47738	Comt	Aldh2	0.777498	Membrane~Matrix
O88587	P54116	Comt	Stom	0.877762	Membrane~Membrane
O88587	P58281	Comt	Opa1	0.694995	Membrane~IMM
O88587	P59017	Comt	Bcl2l13	0.672131	Membrane~OMM
O88587	P63030	Comt	Mpc1	0.844102	Membrane~IMM
O88587	P97478	Comt	Coq7	0.857614	Membrane~IMM
O88587	P99028	Comt	Uqcrh	0.707228	Membrane~IMM
O88587	Q06185	Comt	Atp5k	0.707	Membrane~IMM
O88587	Q3TBW2	Comt	Mrpl10	0.798726	Membrane~Matrix
O88587	Q3ULD5	Comt	Mccc2	0.844099	Membrane~Matrix
O88587	Q4KMM3	Comt	Oxr1	0.817367	Membrane~OMM
O88587	Q60930	Comt	Vdac2	0.73474	Membrane~OMM
O88587	Q61387	Comt	Cox7a2l	0.744211	Membrane~IMM
O88587	Q62425	Comt	Ndufa4	0.748713	Membrane~IMM
O88587	Q64521	Comt	Gpd2	0.762304	Membrane~IMM
O88587	Q78IK2	Comt	Atp5md	0.65641	Membrane~IMM
O88587	Q791V5	Comt	Mtch2	0.642866	Membrane~OMM
O88587	Q7TMF3	Comt	Ndufa12	0.715427	Membrane~IMM
O88587	Q7TSQ8	Comt	Pdpr	0.790131	Membrane~Matrix
O88587	Q80V03	Comt	Adck5	0.794686	Membrane~Unknown
O88587	Q8BFR5	Comt	Tufm	0.646	Membrane~Matrix
O88587	Q8BH59	Comt	Slc25a12	0.729379	Membrane~IMM
O88587	Q8BKZ9	Comt	Pdhx	0.792124	Membrane~Matrix
O88587	Q8BMF4	Comt	Dlat	0.778613	Membrane~Matrix
O88587	Q8BMS1	Comt	Hadha	0.756794	Membrane~IMM
O88587	Q8BW75	Comt	Maob	0.673229	Membrane~OMM
O88587	Q8C167	Comt	Prepl	0.644965	Membrane~Matrix
O88587	Q8C2E4	Comt	Ptcd1	0.797903	Membrane~Matrix
O88587	Q8CGK3	Comt	Lonp1	0.774833	Membrane~Matrix
O88587	Q8JZN5	Comt	Acad9	0.708594	Membrane~IMM
O88587	Q8JZQ2	Comt	Afg3l2	0.788449	Membrane~IMM
O88587	Q8K1R3	Comt	Pnpt1	0.881732	Membrane~Matrix|IMS
O88587	Q8R086	Comt	Suox	0.857286	Membrane~IMS
O88587	Q8R0Y6	Comt	Aldh1l1	0.768052	Membrane~Matrix
O88587	Q8R1I1	Comt	Uqcr10	0.74457	Membrane~IMM
O88587	Q8R3J4	Comt	Mterf3	0.745415	Membrane~Matrix
O88587	Q8VC19	Comt	Alas1	0.917932	Membrane~Matrix
O88587	Q91V61	Comt	Sfxn3	0.703485	Membrane~IMM
O88587	Q91WK5	Comt	Gcsh	0.848255	Membrane~Matrix
O88587	Q91WS0	Comt	Cisd1	0.645913	Membrane~OMM
O88587	Q922Q1	Comt	Mtarc2	0.679903	Membrane~OMM
O88587	Q99JB2	Comt	Stoml2	0.857514	Membrane~IMM
O88587	Q99JR1	Comt	Sfxn1	0.715402	Membrane~IMM
O88587	Q99LY9	Comt	Ndufs5	0.70826	Membrane~IMM
O88587	Q9CPQ3	Comt	Tomm22	0.831314	Membrane~OMM
O88587	Q9CPX8	Comt	Uqcr11	0.687237	Membrane~IMM
O88587	Q9CQ54	Comt	Ndufc2	0.688397	Membrane~IMM
O88587	Q9CQ75	Comt	Ndufa2	0.715815	Membrane~IMM
O88587	Q9CQ91	Comt	Ndufa3	0.709635	Membrane~IMM
O88587	Q9CQN1	Comt	Trap1	0.848603	Membrane~Matrix
O88587	Q9CQT9	Comt	Rab5if	0.839544	Membrane~IMM
O88587	Q9CQV1	Comt	Pam16	0.911284	Membrane~IMM
O88587	Q9CQX8	Comt	Mrps36	0.731568	Membrane~Matrix
O88587	Q9CQZ5	Comt	Ndufa6	0.791342	Membrane~IMM
O88587	Q9CR62	Comt	Slc25a11	0.840775	Membrane~IMM
O88587	Q9CYH2	Comt	Prxl2a	0.824069	Membrane~Membrane
O88587	Q9CZS1	Comt	Aldh1b1	0.802489	Membrane~Matrix
O88587	Q9CZW5	Comt	Tomm70a	0.845534	Membrane~OMM
O88587	Q9D0M3	Comt	Cyc1	0.689113	Membrane~IMM
O88587	Q9D6R2	Comt	Idh3a	0.785905	Membrane~Matrix
O88587	Q9D880	Comt	Timm50	0.892536	Membrane~IMM
O88587	Q9DB41	Comt	Slc25a18	0.829813	Membrane~IMM
O88587	Q9DCC8	Comt	Tomm20	0.747865	Membrane~OMM
O88587	Q9DCV6	Comt	Dele1	0.773431	Membrane~IMM
O88587	Q9DCZ4	Comt	Apoo	0.770689	Membrane~IMM
O88587	Q9JMH6	Comt	Txnrd1	0.81289	Membrane~Unknown
O88587	Q9WV98	Comt	Timm9	0.715024	Membrane~IMM
O88696	P28352	Clpp	Apex1	0.685991	Matrix~Matrix
O88696	P30275	Clpp	Ckmt1	0.741161	Matrix~IMM
O88696	P34914	Clpp	Ephx2	0.677823	Matrix~Unknown
O88696	P47738	Clpp	Aldh2	0.716687	Matrix~Matrix
O88696	P51660	Clpp	Hsd17b4	0.644607	Matrix~Unknown
O88696	P52825	Clpp	Cpt2	0.67902	Matrix~IMM
O88696	P54116	Clpp	Stom	0.737038	Matrix~Membrane
O88696	P56380	Clpp	Nudt2	0.645772	Matrix~Matrix
O88696	P62075	Clpp	Timm13	0.71071	Matrix~IMM
O88696	P62077	Clpp	Timm8b	0.742639	Matrix~IMM
O88696	P84084	Clpp	Arf5	0.680148	Matrix~Unknown
O88696	Q07417	Clpp	Acads	0.814289	Matrix~Matrix
O88696	Q3UHB1	Clpp	Nt5dc3	0.712513	Matrix~Matrix
O88696	Q3UNZ8	Clpp	Cryzl2	0.673949	Matrix~Matrix
O88696	Q3URE1	Clpp	Acsf3	0.705412	Matrix~Matrix
O88696	Q3V132	Clpp	Slc25a31	0.66833	Matrix~IMM
O88696	Q3V3R1	Clpp	Mthfd1l	0.86143	Matrix~Matrix
O88696	Q571F8	Clpp	Gls2	0.713549	Matrix~Matrix
O88696	Q59J78	Clpp	Ndufaf2	0.80731	Matrix~IMM
O88696	Q5M8N4	Clpp	Sdr39u1	0.820373	Matrix~Unknown
O88696	Q60759	Clpp	Gcdh	0.793213	Matrix~Matrix
O88696	Q6P8J7	Clpp	Ckmt2	0.676988	Matrix~IMM
O88696	Q80XN0	Clpp	Bdh1	0.681661	Matrix~IMM
O88696	Q80Y14	Clpp	Glrx5	0.809774	Matrix~Matrix
O88696	Q8BGY7	Clpp	Fam210a	0.724617	Matrix~IMM
O88696	Q8BIJ6	Clpp	Iars2	0.785628	Matrix~Matrix
O88696	Q8BIP0	Clpp	Dars2	0.785601	Matrix~Matrix
O88696	Q8BKZ9	Clpp	Pdhx	0.678735	Matrix~Matrix
O88696	Q8BMS1	Clpp	Hadha	0.68012	Matrix~IMM
O88696	Q8BTE0	Clpp	Sdhaf4	0.757994	Matrix~Matrix
O88696	Q8BVI4	Clpp	Qdpr	0.667973	Matrix~Matrix
O88696	Q8BYM8	Clpp	Cars2	0.682972	Matrix~Matrix
O88696	Q8CG76	Clpp	Akr7a5	0.647994	Matrix~Matrix
O88696	Q8CIW5	Clpp	Twnk	0.78187	Matrix~Matrix
O88696	Q8K0Z7	Clpp	Taco1	0.782062	Matrix~Matrix
O88696	Q8K2B3	Clpp	Sdha	0.771685	Matrix~IMM
O88696	Q8K354	Clpp	Cbr3	0.695493	Matrix~Matrix
O88696	Q8VC19	Clpp	Alas1	0.681232	Matrix~Matrix
O88696	Q8VDC0	Clpp	Lars2	0.745563	Matrix~Matrix
O88696	Q8VDK1	Clpp	Nit1	0.903901	Matrix~Matrix
O88696	Q91V92	Clpp	Acly	0.742177	Matrix~Matrix
O88696	Q91XF0	Clpp	Pnpo	0.642292	Matrix~Matrix
O88696	Q91YP0	Clpp	L2hgdh	0.727816	Matrix~IMM
O88696	Q922H2	Clpp	Pdk3	0.824088	Matrix~Matrix
O88696	Q99J39	Clpp	Mlycd	0.672463	Matrix~Matrix
O88696	Q99JY0	Clpp	Hadhb	0.708095	Matrix~IMM
O88696	Q99L04	Clpp	Dhrs1	0.722574	Matrix~IMM
O88696	Q99L13	Clpp	Hibadh	0.840792	Matrix~Matrix
O88696	Q99LP6	Clpp	Grpel1	0.677446	Matrix~Matrix
O88696	Q99MN1	Clpp	Kars	0.689025	Matrix~Matrix
O88696	Q9CPS6	Clpp	Hint3	0.813815	Matrix~Unknown
O88696	Q9CPX8	Clpp	Uqcr11	0.724934	Matrix~IMM
O88696	Q9CQA3	Clpp	Sdhb	0.686576	Matrix~IMM
O88696	Q9CQY6	Clpp	Uqcc2	0.773519	Matrix~IMM
O88696	Q9CWU6	Clpp	Uqcc1	0.803391	Matrix~IMM
O88696	Q9CY16	Clpp	Mrps28	0.693121	Matrix~Matrix
O88696	Q9CZ42	Clpp	Naxd	0.704607	Matrix~IMM
O88696	Q9CZD3	Clpp	Gars	0.642837	Matrix~Matrix
O88696	Q9CZS1	Clpp	Aldh1b1	0.759585	Matrix~Matrix
O88696	Q9CZU6	Clpp	Cs	0.751883	Matrix~Matrix
O88696	Q9D0D3	Clpp	Mtpap	0.692296	Matrix~Matrix
O88696	Q9D113	Clpp	Dnlz	0.724934	Matrix~Matrix
O88696	Q9D404	Clpp	Oxsm	0.725032	Matrix~Matrix
O88696	Q9D6U8	Clpp	Fam162a	0.700351	Matrix~IMM
O88696	Q9DBF1	Clpp	Aldh7a1	0.737975	Matrix~Matrix
O88696	Q9DC61	Clpp	Pmpca	0.696441	Matrix~Matrix
O88696	Q9DCZ4	Clpp	Apoo	0.789254	Matrix~IMM
O88696	Q9JIY5	Clpp	Htra2	0.757	Matrix~IMM
O88696	Q9JK81	Clpp	Myg1	0.696294	Matrix~Matrix
O88696	Q9JLJ2	Clpp	Aldh9a1	0.659888	Matrix~Matrix
O88696	Q9JLZ3	Clpp	Auh	0.810928	Matrix~Matrix
O88696	Q9JMH6	Clpp	Txnrd1	0.68505	Matrix~Unknown
O88696	Q9WVA2	Clpp	Timm8a1	0.754864	Matrix~IMM
O88696	Q9Z2I0	Clpp	Letm1	0.655515	Matrix~IMM
O88696	Q9Z2I8	Clpp	Suclg2	0.696723	Matrix~Matrix
O88696	Q9Z2Y8	Clpp	Plpbp	0.66711	Matrix~Matrix
O88741	P05132	Gdap1	Prkaca	0.929641	OMM~IMM
O88741	P12787	Gdap1	Cox5a	0.695898	OMM~IMM
O88741	P28661	Gdap1	Septin4	0.84707	OMM~OMM
O88741	P30275	Gdap1	Ckmt1	0.694993	OMM~IMM
O88741	P36552	Gdap1	Cpox	0.768757	OMM~IMM
O88741	P48771	Gdap1	Cox7a2	0.911884	OMM~IMM
O88741	P48962	Gdap1	Slc25a4	0.808666	OMM~IMM
O88741	P50544	Gdap1	Acadvl	0.845191	OMM~IMM
O88741	P51881	Gdap1	Slc25a5	0.864227	OMM~IMM
O88741	P52503	Gdap1	Ndufs6	0.748895	OMM~IMM
O88741	P56135	Gdap1	Atp5j2	0.906267	OMM~IMM
O88741	P56382	Gdap1	Atp5e	0.917616	OMM~IMM
O88741	P56391	Gdap1	Cox6b1	0.781985	OMM~IMM
O88741	P58281	Gdap1	Opa1	0.840479	OMM~IMM
O88741	P59017	Gdap1	Bcl2l13	0.775808	OMM~OMM
O88741	P62073	Gdap1	Timm10	0.749818	OMM~IMM
O88741	P63030	Gdap1	Mpc1	0.811009	OMM~IMM
O88741	P67778	Gdap1	Phb	0.787468	OMM~IMM
O88741	P97450	Gdap1	Atp5j	0.89472	OMM~IMM
O88741	P97478	Gdap1	Coq7	0.699482	OMM~IMM
O88741	P99028	Gdap1	Uqcrh	0.77532	OMM~IMM
O88741	Q06185	Gdap1	Atp5k	0.898142	OMM~IMM
O88741	Q3UV70	Gdap1	Pdp1	0.69259	OMM~IMM
O88741	Q3V132	Gdap1	Slc25a31	0.659182	OMM~IMM
O88741	Q4KMM3	Gdap1	Oxr1	0.893264	OMM~OMM
O88741	Q5SUC9	Gdap1	Sco1	0.711945	OMM~IMM
O88741	Q5U458	Gdap1	Dnajc11	0.815351	OMM~OMM
O88741	Q60930	Gdap1	Vdac2	0.867073	OMM~OMM
O88741	Q60931	Gdap1	Vdac3	0.825535	OMM~OMM
O88741	Q60932	Gdap1	Vdac1	0.807972	OMM~OMM
O88741	Q61171	Gdap1	Prdx2	0.909695	OMM~Unknown
O88741	Q61387	Gdap1	Cox7a2l	0.866591	OMM~IMM
O88741	Q62425	Gdap1	Ndufa4	0.926474	OMM~IMM
O88741	Q64133	Gdap1	Maoa	0.929777	OMM~OMM
O88741	Q64373	Gdap1	Bcl2l1	0.707605	OMM~OMM
O88741	Q64445	Gdap1	Cox8a	0.866496	OMM~IMM
O88741	Q64521	Gdap1	Gpd2	0.925509	OMM~IMM
O88741	Q78IK2	Gdap1	Atp5md	0.830221	OMM~IMM
O88741	Q791V5	Gdap1	Mtch2	0.889599	OMM~OMM
O88741	Q7TMF3	Gdap1	Ndufa12	0.903897	OMM~IMM
O88741	Q7TNG8	Gdap1	Ldhd	0.772128	OMM~IMM
O88741	Q80SW1	Gdap1	Ahcyl1	0.819274	OMM~OMM
O88741	Q80V03	Gdap1	Adck5	0.655585	OMM~Unknown
O88741	Q8BH59	Gdap1	Slc25a12	0.918572	OMM~IMM
O88741	Q8BK30	Gdap1	Ndufv3	0.823015	OMM~IMM
O88741	Q8BW75	Gdap1	Maob	0.90668	OMM~OMM
O88741	Q8C0T9	Gdap1	Adcy10	0.640781	OMM~Membrane
O88741	Q8CC21	Gdap1	Ttc19	0.742815	OMM~IMM
O88741	Q8JZN5	Gdap1	Acad9	0.678423	OMM~IMM
O88741	Q8JZQ2	Gdap1	Afg3l2	0.905409	OMM~IMM
O88741	Q8K1R3	Gdap1	Pnpt1	0.720004	IMS~OMM
O88741	Q8K1Z0	Gdap1	Coq9	0.912973	OMM~IMM
O88741	Q8K2B3	Gdap1	Sdha	0.809956	OMM~IMM
O88741	Q8K3J1	Gdap1	Ndufs8	0.893728	OMM~IMM
O88741	Q8R086	Gdap1	Suox	0.764296	OMM~IMS
O88741	Q8R1I1	Gdap1	Uqcr10	0.854102	OMM~IMM
O88741	Q8R1R3	Gdap1	Stard7	0.752368	OMM~IMS
O88741	Q8VEM8	Gdap1	Slc25a3	0.898384	OMM~IMM
O88741	Q91V61	Gdap1	Sfxn3	0.929331	OMM~IMM
O88741	Q91VD9	Gdap1	Ndufs1	0.89451	OMM~IMM
O88741	Q91VR2	Gdap1	Atp5c1	0.850057	OMM~IMM
O88741	Q91WC3	Gdap1	Acsl6	0.900868	OMM~OMM
O88741	Q91WD5	Gdap1	Ndufs2	0.910447	OMM~IMM
O88741	Q91WS0	Gdap1	Cisd1	0.937555	OMM~OMM
O88741	Q91YT0	Gdap1	Ndufv1	0.843159	OMM~IMM
O88741	Q921G7	Gdap1	Etfdh	0.93357	OMM~IMM
O88741	Q922Q1	Gdap1	Mtarc2	0.863765	OMM~OMM
O88741	Q99JB2	Gdap1	Stoml2	0.741102	OMM~IMM
O88741	Q99JR1	Gdap1	Sfxn1	0.907838	OMM~IMM
O88741	Q99LC3	Gdap1	Ndufa10	0.736394	OMM~IMM
O88741	Q99LY9	Gdap1	Ndufs5	0.929549	OMM~IMM
O88741	Q9CPP6	Gdap1	Ndufa5	0.922436	OMM~IMM
O88741	Q9CPQ3	Gdap1	Tomm22	0.830789	OMM~OMM
O88741	Q9CPQ8	Gdap1	Atp5l	0.945094	OMM~IMM
O88741	Q9CPU2	Gdap1	Ndufb2	0.674803	OMM~IMM
O88741	Q9CPX8	Gdap1	Uqcr11	0.931565	OMM~IMM
O88741	Q9CQ54	Gdap1	Ndufc2	0.851618	OMM~IMM
O88741	Q9CQ75	Gdap1	Ndufa2	0.818545	OMM~IMM
O88741	Q9CQ85	Gdap1	Timm22	0.690103	OMM~IMM
O88741	Q9CQ91	Gdap1	Ndufa3	0.725582	OMM~IMM
O88741	Q9CQA3	Gdap1	Sdhb	0.81911	OMM~IMM
O88741	Q9CQC7	Gdap1	Ndufb4	0.830111	OMM~IMM
O88741	Q9CQH3	Gdap1	Ndufb5	0.856358	OMM~IMM
O88741	Q9CQJ8	Gdap1	Ndufb9	0.821695	OMM~IMM
O88741	Q9CQQ7	Gdap1	Atp5pb	0.943749	OMM~IMM
O88741	Q9CQT9	Gdap1	Rab5if	0.862122	OMM~IMM
O88741	Q9CQV1	Gdap1	Pam16	0.807459	OMM~IMM
O88741	Q9CQV7	Gdap1	Dnajc19	0.840071	OMM~IMM
O88741	Q9CQZ5	Gdap1	Ndufa6	0.876943	OMM~IMM
O88741	Q9CQZ6	Gdap1	Ndufb3	0.821687	OMM~IMM
O88741	Q9CR62	Gdap1	Slc25a11	0.863045	OMM~IMM
O88741	Q9CXZ1	Gdap1	Ndufs4	0.905413	OMM~IMM
O88741	Q9CYH2	Gdap1	Prxl2a	0.826293	OMM~Membrane
O88741	Q9CZ13	Gdap1	Uqcrc1	0.764728	OMM~IMM
O88741	Q9CZP5	Gdap1	Bcs1l	0.679076	OMM~IMM
O88741	Q9D2R6	Gdap1	Coa3	0.668336	OMM~IMM
O88741	Q9D3D9	Gdap1	Atp5d	0.918266	OMM~IMM
O88741	Q9D6J6	Gdap1	Ndufv2	0.834929	OMM~IMM
O88741	Q9D6M3	Gdap1	Slc25a22	0.794684	OMM~IMM
O88741	Q9D6U8	Gdap1	Fam162a	0.649384	OMM~IMM
O88741	Q9D880	Gdap1	Timm50	0.645435	OMM~IMM
O88741	Q9D8W7	Gdap1	Ociad2	0.898472	OMM~Unknown
O88741	Q9DB41	Gdap1	Slc25a18	0.782971	OMM~IMM
O88741	Q9DC69	Gdap1	Ndufa9	0.800038	OMM~IMM
O88741	Q9DC70	Gdap1	Ndufs7	0.907193	OMM~IMM
O88741	Q9DCC8	Gdap1	Tomm20	0.811891	OMM~OMM
O88741	Q9DCJ5	Gdap1	Ndufa8	0.803499	OMM~IMM
O88741	Q9DCN2	Gdap1	Cyb5r3	0.915929	OMM~OMM
O88741	Q9DCS9	Gdap1	Ndufb10	0.889616	OMM~IMM
O88741	Q9DCT2	Gdap1	Ndufs3	0.856939	OMM~IMM
O88741	Q9DCZ4	Gdap1	Apoo	0.723018	OMM~IMM
O88741	Q9WV98	Gdap1	Timm9	0.904187	OMM~IMM
O88741	Q9Z1P6	Gdap1	Ndufa7	0.749165	OMM~IMM
O88741	Q9Z2I0	Gdap1	Letm1	0.927511	OMM~IMM
O88845	P32020	Akap10	Scp2	0.728859	OMM~IMM
O88845	P36552	Akap10	Cpox	0.726944	OMM~IMM
O88845	P59017	Akap10	Bcl2l13	0.686036	OMM~OMM
O88845	P62075	Akap10	Timm13	0.714984	OMM~IMM
O88845	P62077	Akap10	Timm8b	0.773786	OMM~IMM
O88845	P84084	Akap10	Arf5	0.732317	OMM~Unknown
O88845	P97478	Akap10	Coq7	0.715157	OMM~IMM
O88845	Q07813	Akap10	Bax	0.75597	OMM~OMM
O88845	Q5SV80	Akap10	Myo19	0.833388	OMM~OMM
O88845	Q60930	Akap10	Vdac2	0.65067	OMM~OMM
O88845	Q61576	Akap10	Fkbp10	0.753271	OMM~IMS
O88845	Q64373	Akap10	Bcl2l1	0.708924	OMM~OMM
O88845	Q78IK2	Akap10	Atp5md	0.669448	OMM~IMM
O88845	Q80V03	Akap10	Adck5	0.675527	OMM~Unknown
O88845	Q8BP40	Akap10	Acp6	0.692644	OMM~IMS
O88845	Q8BX10	Akap10	Pgam5	0.651835	OMM~OMM
O88845	Q8CC21	Akap10	Ttc19	0.77638	OMM~IMM
O88845	Q8JZN5	Akap10	Acad9	0.656363	OMM~IMM
O88845	Q8K1R3	Akap10	Pnpt1	0.741872	IMS~OMM
O88845	Q8K3J1	Akap10	Ndufs8	0.66901	OMM~IMM
O88845	Q8R3Q6	Akap10	Ccdc58	0.791599	OMM~IMS
O88845	Q8VCH0	Akap10	Acaa1b	0.72975	OMM~Unknown
O88845	Q91WD5	Akap10	Ndufs2	0.642321	OMM~IMM
O88845	Q922G0	Akap10	Slc25a36	0.769274	OMM~IMM
O88845	Q99NB1	Akap10	Acss1	0.65918	OMM~IMM
O88845	Q9CQ92	Akap10	Fis1	0.704051	OMM~OMM
O88845	Q9CQJ8	Akap10	Ndufb9	0.643171	OMM~IMM
O88845	Q9CR98	Akap10	Fam136a	0.671662	OMM~IMS
O88845	Q9CRA5	Akap10	Golph3	0.809676	OMM~IMS
O88845	Q9D1R1	Akap10	Tmem126b	0.682412	OMM~IMM
O88845	Q9D2R6	Akap10	Coa3	0.675645	OMM~IMM
O88845	Q9D6U8	Akap10	Fam162a	0.704354	OMM~IMM
O88845	Q9D880	Akap10	Timm50	0.741071	OMM~IMM
O88845	Q9D8W7	Akap10	Ociad2	0.736033	OMM~Unknown
O88845	Q9D9V3	Akap10	Echdc1	0.754228	OMM~Unknown
O88845	Q9DCS9	Akap10	Ndufb10	0.697787	OMM~IMM
O88845	Q9JJW0	Akap10	Pxmp4	0.664771	OMM~Unknown
O88845	Q9R257	Akap10	Hebp1	0.729246	OMM~IMS
O88845	Q9WVA2	Akap10	Timm8a1	0.691538	OMM~IMM
O89106	P28352	Fhit	Apex1	0.669966	Matrix~Matrix
O89106	P32020	Fhit	Scp2	0.682798	Matrix~IMM
O89106	P35486	Fhit	Pdha1	0.654865	Matrix~Matrix
O89106	P38060	Fhit	Hmgcl	0.689904	Matrix~Matrix
O89106	P47738	Fhit	Aldh2	0.762393	Matrix~Matrix
O89106	P47934	Fhit	Crat	0.856104	Matrix~IMM
O89106	P48962	Fhit	Slc25a4	0.641386	Matrix~IMM
O89106	P50171	Fhit	H2-Ke6	0.718527	Matrix~Matrix
O89106	P51881	Fhit	Slc25a5	0.695839	Matrix~IMM
O89106	P52825	Fhit	Cpt2	0.670033	Matrix~IMM
O89106	P54116	Fhit	Stom	0.679692	Matrix~Membrane
O89106	P62073	Fhit	Timm10	0.760177	Matrix~IMM
O89106	P62077	Fhit	Timm8b	0.772338	Matrix~IMM
O89106	P70404	Fhit	Idh3g	0.700239	Matrix~Matrix
O89106	P84084	Fhit	Arf5	0.657998	Matrix~Unknown
O89106	Q2TPA8	Fhit	Hsdl2	0.749906	Matrix~Matrix
O89106	Q3TC72	Fhit	Fahd2a	0.73287	Matrix~Matrix
O89106	Q3TL44	Fhit	Nlrx1	0.857249	Matrix~Matrix
O89106	Q3U5Q7	Fhit	Cmpk2	0.779592	Matrix~Matrix
O89106	Q3U6U5	Fhit	Gtpbp6	0.801644	Matrix~Matrix
O89106	Q3UGX3	Fhit	Nat8l	0.784277	Matrix~Membrane
O89106	Q3URE1	Fhit	Acsf3	0.705455	Matrix~Matrix
O89106	Q3UUI3	Fhit	Them4	0.699097	Matrix~IMM
O89106	Q3V3R1	Fhit	Mthfd1l	0.735395	Matrix~Matrix
O89106	Q59J78	Fhit	Ndufaf2	0.806561	Matrix~IMM
O89106	Q5M8N4	Fhit	Sdr39u1	0.860292	Matrix~Unknown
O89106	Q5SWU9	Fhit	Acaca	0.66789	Matrix~Matrix
O89106	Q61171	Fhit	Prdx2	0.713668	Matrix~Unknown
O89106	Q6P8J7	Fhit	Ckmt2	0.795478	Matrix~IMM
O89106	Q78IK4	Fhit	Apool	0.816324	Matrix~IMM
O89106	Q80SX8	Fhit	Pif1	0.757893	Matrix~Matrix
O89106	Q80XL6	Fhit	Acad11	0.899945	Matrix~IMM
O89106	Q80XN0	Fhit	Bdh1	0.72539	Matrix~IMM
O89106	Q80Y14	Fhit	Glrx5	0.72286	Matrix~Matrix
O89106	Q8BGC4	Fhit	Zadh2	0.709151	Matrix~Unknown
O89106	Q8BGY7	Fhit	Fam210a	0.770157	Matrix~IMM
O89106	Q8BH04	Fhit	Pck2	0.653317	Matrix~Matrix
O89106	Q8BH95	Fhit	Echs1	0.796481	Matrix~Matrix
O89106	Q8BMS1	Fhit	Hadha	0.721589	Matrix~IMM
O89106	Q8BVI4	Fhit	Qdpr	0.717123	Matrix~Matrix
O89106	Q8BVU5	Fhit	Nudt9	0.826439	Matrix~Matrix
O89106	Q8BYL4	Fhit	Yars2	0.849227	Matrix~Matrix
O89106	Q8BYM8	Fhit	Cars2	0.783984	Matrix~Matrix
O89106	Q8CAK1	Fhit	Iba57	0.678303	Matrix~Matrix
O89106	Q8CCT7	Fhit	Nsun3	0.807196	Matrix~Matrix
O89106	Q8CG76	Fhit	Akr7a5	0.647972	Matrix~Matrix
O89106	Q8K009	Fhit	Aldh1l2	0.890922	Matrix~Matrix
O89106	Q8K0Z7	Fhit	Taco1	0.684266	Matrix~Matrix
O89106	Q8K2C6	Fhit	Sirt5	0.670207	Matrix~Matrix
O89106	Q8K411	Fhit	Pitrm1	0.847594	Matrix~Matrix
O89106	Q8R0N6	Fhit	Adhfe1	0.707201	Matrix~Matrix
O89106	Q8R3F5	Fhit	Mcat	0.67296	Matrix~Matrix
O89106	Q8R4H7	Fhit	Nags	0.884025	Matrix~Matrix
O89106	Q8R4N0	Fhit	Clybl	0.72411	Matrix~Matrix
O89106	Q8VCE1	Fhit	Dnajc28	0.820785	Matrix~Unknown
O89106	Q8VCW8	Fhit	Acsf2	0.747662	Matrix~Matrix
O89106	Q8VDC0	Fhit	Lars2	0.73987	Matrix~Matrix
O89106	Q8VDK1	Fhit	Nit1	0.679105	Matrix~Matrix
O89106	Q8VE38	Fhit	Oxnad1	0.827261	Matrix~Matrix
O89106	Q91V92	Fhit	Acly	0.67415	Matrix~Matrix
O89106	Q91VA6	Fhit	Poldip2	0.770496	Matrix~Matrix
O89106	Q91VT4	Fhit	Cbr4	0.724118	Matrix~Matrix
O89106	Q91XF0	Fhit	Pnpo	0.657823	Matrix~Matrix
O89106	Q91XL9	Fhit	Osbpl1a	0.829348	Matrix~Unknown
O89106	Q91YP0	Fhit	L2hgdh	0.83294	Matrix~IMM
O89106	Q91YP2	Fhit	Nln	0.805611	Matrix~Matrix
O89106	Q91Z53	Fhit	Grhpr	0.667878	Matrix~Matrix
O89106	Q99JB2	Fhit	Stoml2	0.81702	Matrix~IMM
O89106	Q99JY0	Fhit	Hadhb	0.77146	Matrix~IMM
O89106	Q99L04	Fhit	Dhrs1	0.851395	Matrix~IMM
O89106	Q99L13	Fhit	Hibadh	0.808443	Matrix~Matrix
O89106	Q99LB2	Fhit	Dhrs4	0.736484	Matrix~Matrix
O89106	Q99LC5	Fhit	Etfa	0.663405	Matrix~Matrix
O89106	Q99LP6	Fhit	Grpel1	0.906638	Matrix~Matrix
O89106	Q99NB1	Fhit	Acss1	0.722774	Matrix~IMM
O89106	Q9CPS6	Fhit	Hint3	0.855028	Matrix~Unknown
O89106	Q9CPV4	Fhit	Glod4	0.692202	Matrix~Matrix
O89106	Q9CPX8	Fhit	Uqcr11	0.714574	Matrix~IMM
O89106	Q9CPY7	Fhit	Lap3	0.754703	Matrix~Matrix
O89106	Q9CQ62	Fhit	Decr1	0.84324	Matrix~Matrix
O89106	Q9CQA3	Fhit	Sdhb	0.692867	Matrix~IMM
O89106	Q9CQN7	Fhit	Mrpl41	0.847127	Matrix~Matrix
O89106	Q9CQX8	Fhit	Mrps36	0.880876	Matrix~Matrix
O89106	Q9CWU6	Fhit	Uqcc1	0.818069	Matrix~IMM
O89106	Q9CWX4	Fhit	Rpusd4	0.876679	Matrix~Matrix
O89106	Q9CY16	Fhit	Mrps28	0.684483	Matrix~Matrix
O89106	Q9CYR0	Fhit	Ssbp1	0.773876	Matrix~Matrix
O89106	Q9CZR8	Fhit	Tsfm	0.78036	Matrix~Matrix
O89106	Q9D023	Fhit	Mpc2	0.772975	Matrix~IMM
O89106	Q9D0D3	Fhit	Mtpap	0.773712	Matrix~Matrix
O89106	Q9D113	Fhit	Dnlz	0.664302	Matrix~Matrix
O89106	Q9D6U8	Fhit	Fam162a	0.798998	Matrix~IMM
O89106	Q9D8S4	Fhit	Rexo2	0.819312	Matrix~Matrix
O89106	Q9DA03	Fhit	Lyrm7	0.748005	Matrix~Matrix
O89106	Q9DB15	Fhit	Mrpl12	0.899985	Matrix~Matrix
O89106	Q9DBF1	Fhit	Aldh7a1	0.667236	Matrix~Matrix
O89106	Q9DC50	Fhit	Crot	0.664178	Matrix~Unknown
O89106	Q9DCM0	Fhit	Ethe1	0.64343	Matrix~Matrix
O89106	Q9DCV6	Fhit	Dele1	0.64469	Matrix~IMM
O89106	Q9DCW4	Fhit	Etfb	0.693468	Matrix~Matrix
O89106	Q9DCZ4	Fhit	Apoo	0.856841	Matrix~IMM
O89106	Q9EQ20	Fhit	Aldh6a1	0.784683	Matrix~IMM
O89106	Q9JK81	Fhit	Myg1	0.873063	Matrix~Matrix
O89106	Q9JLZ3	Fhit	Auh	0.78602	Matrix~Matrix
O89106	Q9JMH6	Fhit	Txnrd1	0.753959	Matrix~Unknown
O89106	Q9R0X4	Fhit	Acot9	0.887692	Matrix~IMM
O89106	Q9WUR9	Fhit	Ak4	0.653513	Matrix~Matrix
O89106	Q9WV98	Fhit	Timm9	0.688705	Matrix~IMM
O89106	Q9WVA2	Fhit	Timm8a1	0.843424	Matrix~IMM
O89106	Q9WVL0	Fhit	Gstz1	0.659584	Matrix~Matrix
O89106	Q9Z0X1	Fhit	Aifm1	0.854135	Matrix~IMM
[truncated: 18,744 more rows]
