# Supplementary material for: Co-fractionation–mass spectrometry to characterize native mitochondrial protein assemblies in mammalian neurons and brain
Source: Springer Nature journal article supplement (doi:10.1038/s41596-023-00901-z), 2023-11-20
Supplement: MOESM3 [file 41596_2023_901_MOESM3_ESM22.xlsx]

## Sheet: README
Supplementary Table 1 | High-quality mt protein interactions predicted in mouse brain
Column header	Remarks
Uniprot ID for mitochondrial interactor A	Uniprot ID for mt interactor A
Uniprot ID for mitochondrial interactor B	Uniprot ID for mt interactor B
Protein name for mitocondrial interactor A	Protein name for mt interactor A
Protein name for mitochondrial interactor B	Gene name for mt interactor B
PPI score from ensemble classifier	Ensemble of supervised machine learning classifiers (Random Forest, Generalized Linear Model, Support Vector Machine) that generates a probability score for each predicted mtPPIs.
Mitochondrial or submitochondrial localization	Localization information is obtained mouse MitoCarta. IMM, inner mitochondrial membrane; OMM, outer mitochondrial membrane; IMS, intermembrane space; Unknown or Membrane, localized to mitochondria but the subcellular mitochondrial compartment is undefined.
Supplementary Table 2 | Mt protein complexes derived from protein interactions in mouse brain
Column header	Remarks
Mitochondrial complex identifier	Mitochondrial complexes identified through two-stage (ClusterONE, MCL) clustering of high-confidence mitochondrial protein-protein interaction network.
Co-complex mitochondrial membership represented with unique UniProt identifier	List of all mitochondrial proteins associated with a predicted complex.
Adjusted P-value for hypergeometric test	P-value adjusted using the Benjamini-Hochberg correction procedure.
Average matching index	Overlap with respect to size of both annotated and predicted complexes.
Mitochondrial complex status	Annotated with new subunits' refers to predicted mt complex overlapping with known complex (i.e., from CORUM, Gene Ontology cellular component, and Reactome) but with some new mitochondrial subunit members; 'Novel' refers to mitochondrial complex not previously reported; and 'Annotated' refers to predicted mitochondrial complex with near matching to known complex subunits.
Supplementary Table 3 | Mt subunits of putative protein complexes enriched for GO annotations, human disorders, and phenotypic aberrations in human disease
Column header	Remarks
Mitochondrial complex identifier	Mitochondrial complexes identified through two-stage (ClusterONE, MCL) clustering of high-confidence mitochondrial protein-protein interaction network.
GO/Human disorders/Phenotypic abnormalities in human disease	Enrichment of mitochondrial complex subunits for Gene Ontology terms, human disorders, and phenotypic anomalies found in human disease.
Data source	Gene Ontology (GO) annotations from biological process (BP), cellular component (CC) and molecular function (MF); Phenotypic abnormalities found in human disease from human phenotype ontology (HPO); and Gene-disease associations from Disease Gene Network (DisGeNET) genetic disorder database.
Adjusted P-value for hypergeometric test	P-value adjusted using the Benjamini-Hochberg correction procedure.
Enrichment	Mitochondrial subunits of the predicted complexes enriched for GO annotations, human disorders, and phenotypic aberrations in human disease.

## Sheet: Supplementary Data 2
Supplementary Data 2 | Mt protein complexes derived from protein interactions in mouse brain
Mitochondrial complex identifier	Co-complex mitochondrial membership represented with unique UniProt identifier	Co-complex mitochondrial membership represented with unique protein name	Adjusted P-value for hypergeometric test	Average matching index	Mitochondrial complex status
1	Q9DCJ5 Q9D6J6 Q91VD9 Q8R1I1 P99028 Q9CYH2 Q9CR62 Q9CQT9 Q9CQQ7 Q9CPQ8 Q99JR1 Q91V61 Q8VEM8 Q8BH59 P63030 P50544 Q9CQZ5 Q9CQC7 Q91VM9 Q9DCC8 Q9D8W7 Q9CXZ1 Q9CQ75 Q9CPP6 Q921G7 Q8JZQ2 Q8CC21 Q9DC70 Q91YT0 Q8BMF4 Q64521 P38647 Q9CQN1 Q99LY9 Q91WS0 Q91WC3 Q9CQ54 Q8K3J1 Q91WD5 Q8K2B3 Q61387 P58281 Q922Q1 Q7TSQ8 Q78IK2 Q5U458 Q9DCZ4 Q9DCT2 Q9DCN2 Q9CZW5 Q9CQ85 P67778 P41216 Q9DC69 Q8JZN5 Q62425 P56382 …	Ndufa8, Ndufv2, Ndufs1, Uqcr10, Uqcrh, Prxl2a, Slc25a11, Rab5if, Atp5pb, Atp5mg, Sfxn1, Sfxn3, Slc25a3, Slc25a12, Mpc1, Acadvl, Ndufa6, Ndufb4, Ppa2, Tomm20, Ociad2, Ndufs4, Ndufa2, Ndufa5, Etfdh, Afg3l2, Ttc19, Ndufs7, Ndufv1, Dlat, Gpd2, Hspa9, Trap1, Ndufs5, Cisd1, Acsl6, Ndufc2, Ndufs8, Ndufs2, Sdha, Cox7a2l, Opa1, Mtarc2, Pdpr, Atp5mk, Dnajc11, Apoo, Ndufs3, Cyb5r3, Tomm70, Timm22, Phb1, Acs…	1.12562e-12	0.380756	Annotated (or known) complexes complexes with new protein subunits
2	Q9Z1P6 Q9CQ69 Q9CR21 Q8C163	Ndufa7, Uqcrq, Ndufab1, Exog	0.00868175	0.508811	Annotated (or known) complexes
3	Q9CYH2 Q9CR62 Q9CQT9 Q9CQQ7 Q9CPQ8 Q8VEM8 Q8BH59 P63030 P50544 Q9CQZ5 Q9DCC8 Q9D8W7 Q9CPP6 Q921G7 Q8JZQ2 Q8CC21 Q91YT0 Q8BMF4 Q8BFR5 Q64521 Q99LY9 Q91WS0 Q91WC3 Q9CQ54 Q8K3J1 Q91WD5 Q61387 Q60931 P58281 Q9CPQ3 Q922Q1 Q791V5 Q78IK2 Q5U458 Q9DCT2 Q9CQ85 P67778 Q9DC69 Q9D051 Q8JZN5 Q62425 Q60597 P56382 Q91WK5 Q64133 Q8R086 Q3UHB1 Q9DB41 Q9CZP5 Q8K1R3 P97478 P03930 Q9D880 Q9D7B6 Q99N92 Q80V03 Q3TBW2 …	Prxl2a, Slc25a11, Rab5if, Atp5pb, Atp5mg, Slc25a3, Slc25a12, Mpc1, Acadvl, Ndufa6, Tomm20, Ociad2, Ndufa5, Etfdh, Afg3l2, Ttc19, Ndufv1, Dlat, Tufm, Gpd2, Ndufs5, Cisd1, Acsl6, Ndufc2, Ndufs8, Ndufs2, Cox7a2l, Vdac3, Opa1, Tomm22, Mtarc2, Mtch2, Atp5mk, Dnajc11, Ndufs3, Timm22, Phb1, Ndufa9, Pdhb, Acad9, Ndufa4, Ogdh, Atp5f1e, Gcsh, Maoa, Suox, Nt5dc3, Slc25a18, Bcs1l, Pnpt1, Coq7, Mtatp8, Timm50…	1.47426e-10	0.365884	Annotated (or known) complexes complexes with new protein subunits
4	Q9Z1P6 Q9CQ69 Q9CR61 Q9CR21 Q9D0M3 Q9DB10 Q9D173 Q3UIU2	Ndufa7, Uqcrq, Ndufb7, Ndufab1, Cyc1, Smdt1, Tomm7, Ndufb6	1.38226e-07	0.536036	Annotated (or known) complexes
5	Q9Z1P6 P03911 Q9DB10 Q9D173 Q9CQX2 Q5SUC9 Q8C163	Ndufa7, Mtnd4, Smdt1, Tomm7, Cyb5b, Sco1, Exog	0.00233503	0.441787	Annotated (or known) complexes complexes with new protein subunits
6	Q99MN1 Q9D6U8 Q9DA03 Q9CQN7 Q9JLJ2 Q9CQX8 Q80Y14 Q9CWU6 Q9Z2I0 Q9DC61 Q9DCZ4 Q99L04 Q9WVA2 Q9CZR8 Q91XF0 Q8VDK1 Q8R3F5 Q8BYL4 Q80XN0 Q78IK4 Q5M8N4 Q3V3R1 Q9EQ80 Q8CGK3 Q9CZS1 Q9CZD3 Q571F8 P62077 P62075 Q9CPS6 Q8BIP0 Q3UHB1 Q99J39 P54116 O35435 P29758 P20108	Kars1, Fam162a, Lyrm7, Mrpl41, Aldh9a1, Mrps36, Glrx5, Uqcc1, Letm1, Pmpca, Apoo, Dhrs1, Timm8a1, Tsfm, Pnpo, Nit1, Mcat, Yars2, Bdh1, Apool, Sdr39u1, Mthfd1l, Nif3l1, Lonp1, Aldh1b1, Gars1, Gls2, Timm8b, Timm13, Hint3, Dars2, Nt5dc3, Mlycd, Stom, Dhodh, Oat, Prdx3	0.00101357	0.415541	Annotated (or known) complexes complexes with new protein subunits
7	Q8R3K3 Q922B1 P52760	Ptcd2, Macrod1, Rida	0.996493	0	Novel complexes
8	Q9Z1P6 Q91VD9 Q9CR61 Q9CR21 Q9D0M3 Q9DCS9 Q9CQZ6 Q9CQ91 Q9CPU2 P03911 Q9DB10 Q9D6J5 Q9D173 Q9CRD0 Q9CQX2 Q8K3J1 Q3UIU2 Q9CQH3 Q9DCT2 P59017 Q7TMF3 Q8C163 O09111 P52503 P00158	Ndufa7, Ndufs1, Ndufb7, Ndufab1, Cyc1, Ndufb10, Ndufb3, Ndufa3, Ndufb2, Mtnd4, Smdt1, Ndufb8, Tomm7, Ociad1, Cyb5b, Ndufs8, Ndufb6, Ndufb5, Ndufs3, Bcl2l13, Ndufa12, Exog, Ndufb11, Ndufs6, Mt-Cyb	6.64836e-13	0.510661	Annotated (or known) complexes
9	Q91VR2 Q9CQQ7 Q9CPQ8 Q8R1R3 Q06185	Atp5f1c, Atp5pb, Atp5mg, Stard7, Atp5me	2.1008e-06	0.525	Annotated (or known) complexes
10	Q99JR1 Q8VEM8 Q8BMF4 Q9Z2I0 Q9WV98 Q99LY9 Q9DCZ4 P51881 Q9EQ80 Q922Q4 Q8CGK3 Q4VAE3 Q64133 Q3UHB1 P03930 P28661 O35435 P05132	Sfxn1, Slc25a3, Dlat, Letm1, Timm9, Ndufs5, Apoo, Slc25a5, Nif3l1, Pycr2, Lonp1, Tmem65, Maoa, Nt5dc3, Mtatp8, Septin4, Dhodh, Prkaca	0.015046	0.269824	Annotated (or known) complexes complexes with new protein subunits
11	Q99MN1 Q9D6U8 Q99L13 Q6PB66 P16332	Kars1, Fam162a, Hibadh, Lrpprc, Mmut	0.0696099	0.183333	Novel complexes
12	Q99MN1 Q99MN9 Q99L13 P16332	Kars1, Pccb, Hibadh, Mmut	0.0935545	0.259346	Novel complexes
13	Q99MN1 Q8BIJ6 Q922E6 Q80Y14 Q9WV98 Q99L13 Q9EQ80 Q922Q4 Q6PB66 P16332	Kars1, Iars2, Fastkd2, Glrx5, Timm9, Hibadh, Nif3l1, Pycr2, Lrpprc, Mmut	0.0202018	0.183333	Annotated (or known) complexes
14	Q99MN1 Q922E6 Q99MN9 Q9EQ80 P16332	Kars1, Fastkd2, Pccb, Nif3l1, Mmut	0.0696099	0.183333	Novel complexes
15	Q99MN1 Q9CQA3 Q9WVA2 Q9EQ80 P51174	Kars1, Sdhb, Timm8a1, Nif3l1, Acadl	0.035911	0.35	Annotated (or known) complexes complexes with new protein subunits
16	Q61733 Q91VN4	Mrps31, Chchd6	0.0603842	0.506098	Annotated (or known) complexes
17	Q99MN1 Q99MN9 Q9WVA2 Q99L13	Kars1, Pccb, Timm8a1, Hibadh	0.0696099	0.381608	Novel complexes
18	Q9CZB0 Q9Z2I9 Q64433 P05202	Sdhc, Sucla2, Hspe1, Got2	0.0696099	0.381608	Novel complexes
19	Q9JLZ3 Q9CQN7 Q9JLJ2 Q8BKZ9 Q9Z2I0 Q99JY0 Q9DCZ4 Q8VCW8 Q8R3F5 Q8CGK3 Q8BIP0 Q8QZT1 Q3URE1 P29758 O88696 O89106	Auh, Mrpl41, Aldh9a1, Pdhx, Letm1, Hadhb, Apoo, Acsf2, Mcat, Lonp1, Dars2, Acat1, Acsf3, Oat, Clpp, Fhit	0.0725928	0.28125	Novel complexes
20	Q8VCH0 Q8R0F8 Q7TMV3	Acaa1b, Fahd1, Fastkd5	0.0763468	0.208333	Novel complexes
21	P19783 Q9CPQ1 P56393 P12787	Cox4i1, Cox6c, Cox7b, Cox5a	6.83317e-08	0.7	Annotated (or known) complexes
22	Q8BIJ6 Q9D6U8 Q9CQA3 Q9CQQ7 Q9QZ23 P97493 Q9Z2I0 Q9DC61 Q99MN9 Q99LY9 Q9CPX8 P51881 Q9WVA2 Q99L13 Q59J78 Q9CZ42 Q9EQ80 Q9D9V3 Q922Q4 O55125 Q922H2 Q60759 Q4VAE3 Q07417 P56382 P62073 Q8CBY0 P16332 O35435	Iars2, Fam162a, Sdhb, Atp5pb, Nfu1, Txn2, Letm1, Pmpca, Pccb, Ndufs5, Uqcr11, Slc25a5, Timm8a1, Hibadh, Ndufaf2, Naxd, Nif3l1, Echdc1, Pycr2, Nipsnap1, Pdk3, Gcdh, Tmem65, Acads, Atp5f1e, Timm10, Gatc, Mmut, Dhodh	0.0725928	0.19444	Novel complexes
23	Q6PCP5 Q3UGX3	Mff, Nat8l	0.996493	0.252203	Novel complexes
24	P11930 Q9D0K2 Q64433 P05202	Nudt19, Oxct1, Hspe1, Got2	0.0988093	0.160714	Novel complexes
25	Q9D6U8 Q9CQA3 Q8R1R3 Q91ZA3 P51881 Q8BGY7 Q9CRA5 Q8BX10 Q5SV80 Q9JIQ3	Fam162a, Sdhb, Stard7, Pcca, Slc25a5, Fam210a, Golph3, Pgam5, Myo19, Diablo	0.0550643	0.3	Novel complexes
26	Q8BP40 P52825 Q14DK4 P84084	Acp6, Cpt2, Gpat2, Arf5	0.996493	0	Novel complexes
27	P19783 Q9CPQ1 P56393 P17665 P43024	Cox4i1, Cox6c, Cox7b, Cox7c, Cox6a1	5.85682e-10	0.75	Annotated (or known) complexes
28	Q9CPQ1 Q8VCM5 Q6ZQJ5 P56393 P17665 P43024 P00405 P12787	Cox6c, Mul1, Dna2, Cox7b, Cox7c, Cox6a1, Mtco2, Cox5a	5.76982e-06	0.47021	Annotated (or known) complexes complexes with new protein subunits
29	Q9D6U8 Q8BH59 P63030 Q91WC3 Q8K3J1 P58281 Q9CZW5 Q9CPX8 Q91WK5 Q9DB41 Q8K1Z0 P19096 O70337	Fam162a, Slc25a12, Mpc1, Acsl6, Ndufs8, Opa1, Tomm70, Uqcr11, Gcsh, Slc25a18, Coq9, Fasn, Bik	0.0650898	0.288462	Novel complexes
30	Q9CPQ1 P56393 P17665 P43024 P00405 Q9QZH6 P12787	Cox6c, Cox7b, Cox7c, Cox6a1, Mtco2, Ecsit, Cox5a	3.01714e-11	0.728571	Annotated (or known) complexes
31	Q8BIJ6 Q9D6U8 Q9CQA3 Q9QZ23 Q9CZU6 Q3UV70 P97493 Q9DC61 Q91ZA3 Q9WVA2 Q8BGY7 Q59J78 Q9CZ42 Q9EQ80 Q922Q4 O55125 Q4VAE3 Q07417 P62073 Q8CBY0 Q9Z1J3	Iars2, Fam162a, Sdhb, Nfu1, Cs, Pdp1, Txn2, Pmpca, Pcca, Timm8a1, Fam210a, Ndufaf2, Naxd, Nif3l1, Pycr2, Nipsnap1, Tmem65, Acads, Timm10, Gatc, Nfs1	0.0101961	0.297619	Annotated (or known) complexes complexes with new protein subunits
32	Q9CPQ1 P56393 O35972 P12787	Cox6c, Cox7b, Mrpl23, Cox5a	0.00276269	0.512195	Annotated (or known) complexes
33	Q8VEM8 P63030 Q99LY9 P51881 Q62425 Q64133 P03930 P56135 P28661 P05132 O88741	Slc25a3, Mpc1, Ndufs5, Slc25a5, Ndufa4, Maoa, Mtatp8, Atp5mf, Septin4, Prkaca, Gdap1	0.0089919	0.3336	Annotated (or known) complexes complexes with new protein subunits
34	Q9DBF1 Q5M8N4	Aldh7a1, Sdr39u1	0.996493	0	Novel complexes
35	Q3UJU9 Q9DCV6 Q9CR98 P54265 Q8BGD8 Q61576 Q8R3Q6 P24270	Rmdn3, Dele1, Fam136a, Dmpk, Coa6, Fkbp10, Mix23, Cat	0.996493	0.104167	Novel complexes
36	Q9WU79 Q9CR98 Q9JHW2 P54265 Q8BGD8 Q61576 Q922G0 P24270 Q3V384 Q07813 O08600	Prodh, Fam136a, Nit2, Dmpk, Coa6, Fkbp10, Slc25a36, Cat, Afg1l, Bax, Endog	0.0725928	0.212121	Novel complexes
37	Q9CR68 Q9JLJ2 Q9CQX8 Q99KE1 Q9WVA2 Q9CZR8 Q99L13 P62077 P62073 P29758 P09528	Uqcrfs1, Aldh9a1, Mrps36, Me2, Timm8a1, Tsfm, Hibadh, Timm8b, Timm10, Oat, Fth1	0.0988093	0.194013	Novel complexes
38	Q9JLT4 Q9CYR0 Q8BTE0 Q2TPA8 Q9CZL5	Txnrd2, Ssbp1, Sdhaf4, Hsdl2, Pcbd2	0.996493	0	Novel complexes
39	Q8R3K3 Q8BWT1 Q8R164 P52196 P47199 P32020 Q80X85	Ptcd2, Acaa2, Bphl, Tst, Cryz, Scp2, Mrps7	0.996493	0.147262	Novel complexes
40	Q9CYG7 Q9D8Z2 Q9CQ92 Q9WTP6 Q9JIY5 Q6P8J7	Tomm34, Triap1, Fis1, Ak2, Htra2, Ckmt2	0.0402949	0.333333	Annotated (or known) complexes complexes with new protein subunits
41	Q9CZB0 Q9WUM5 Q8BVI4 Q91V12 Q64433 Q9D172 P99029 P09671	Sdhc, Suclg1, Qdpr, Acot7, Hspe1, Gatd3, Prdx5, Sod2	0.0469737	0.3125	Annotated (or known) complexes complexes with new protein subunits
42	Q9DC50 Q9DCV4 Q9D1L0 Q80XL6	Crot, Rmdn1, Chchd2, Acad11	0.0909884	0.166667	Novel complexes
43	Q8C0T9 P53395 Q9WU79 Q80U63 Q9CR98 Q9JHW2 P24270	Adcy10, Dbt, Prodh, Mfn2, Fam136a, Nit2, Cat	0.0448808	0.321429	Annotated (or known) complexes complexes with new protein subunits
44	Q9CQA3 Q9CQQ7 P97493 Q8K2B3 Q9WVA2 Q59J78 Q9CZ42 Q4VAE3 P51174 P62073 Q8CBY0	Sdhb, Atp5pb, Txn2, Sdha, Timm8a1, Ndufaf2, Naxd, Tmem65, Acadl, Timm10, Gatc	0.0372687	0.285943	Annotated (or known) complexes complexes with new protein subunits
45	Q03265 Q9DB20 P03930 P97450	Atp5f1a, Atp5po, Mtatp8, Atp5pf	5.01413e-07	0.625	Annotated (or known) complexes
46	Q9D6U8 Q9QZ23 Q9CPX8 Q8JZN5 P56382 Q5SV80 Q9DB41 P16332 O35465 O70337	Fam162a, Nfu1, Uqcr11, Acad9, Atp5f1e, Myo19, Slc25a18, Mmut, Fkbp8, Bik	0.0550643	0.3	Novel complexes
47	Q9DB77 Q9CQ75 P52503	Uqcrc2, Ndufa2, Ndufs6	0.000669326	0.530612	Annotated (or known) complexes
48	P54265 Q9CX83 Q8BGD8 Q61576 O08600	Dmpk, Armcx1, Coa6, Fkbp10, Endog	0.996493	0	Novel complexes
49	Q9Z2I9 P67778 Q920E5 Q80VL1 O35129	Sucla2, Phb1, Fdps, Tdrkh, Phb2	0.000161462	0.7	Annotated (or known) complexes
50	Q8BMS1 Q9JLZ3 Q9D6U8 Q9DA03 Q9CQN7 Q9JLJ2 Q9CQX8 P97493 Q9CWU6 Q9Z2I0 Q9DC61 Q9DBL1 Q99LY9 Q8VC19 Q9CPX8 P51881 Q3U6U5 Q9WVA2 Q9JMH6 Q9CZR8 Q99L13 Q91XF0 Q91V92 Q8VDK1 Q8VCE1 Q8R3F5 Q8BYL4 Q8BGY7 Q80XN0 Q59J78 Q3V3R1 Q9EQ80 Q922Q4 Q8CGK3 O55125 Q60759 Q4VAE3 P51174 P62075 Q6PB66 Q3UHB1 Q3URE1 P29758 P35486 P47738 P09528	Hadha, Auh, Fam162a, Lyrm7, Mrpl41, Aldh9a1, Mrps36, Txn2, Uqcc1, Letm1, Pmpca, Acadsb, Ndufs5, Alas1, Uqcr11, Slc25a5, Gtpbp6, Timm8a1, Txnrd1, Tsfm, Hibadh, Pnpo, Acly, Nit1, Dnajc28, Mcat, Yars2, Fam210a, Bdh1, Ndufaf2, Mthfd1l, Nif3l1, Pycr2, Lonp1, Nipsnap1, Gcdh, Tmem65, Acadl, Timm13, Lrpprc, Nt5dc3, Acsf3, Oat, Pdha1, Aldh2, Fth1	0.00898121	0.521739	Annotated (or known) complexes
51	Q9CR98 Q9CYG7 Q9D8Z2 P54265 Q9CX83 Q8BGD8 Q61576 Q8R3Q6 P24270	Fam136a, Tomm34, Triap1, Dmpk, Armcx1, Coa6, Fkbp10, Mix23, Cat	0.996493	0.115516	Novel complexes
52	Q9D6R2 Q9CQA3 Q9CQQ7 Q9DCC8 Q9CPP6 Q8CC21 Q91YT0 Q8BMF4 Q3UV70 Q99LY9 Q91WS0 Q91WC3 Q8K3J1 Q91WD5 Q60931 Q922Q1 Q9DCT2 Q9DC69 Q8JZN5 Q8CGK3 Q62425 Q4VAE3 P56382 Q91WK5 Q8BW75 Q64133 Q8R086 Q3UHB1 Q9DB41 Q9CZP5 Q8K1R3 P97478 P03930 Q9D880 Q8R0Y6 Q8K1Z0 Q80V03 P59017 Q8VCX5 Q80SW1 Q8C5H8 Q9D6M3 P19096 Q8C167 P36552 O88741 O35465 D3Z7P3 O70337 O35129 O88587 A2APY7	Idh3a, Sdhb, Atp5pb, Tomm20, Ndufa5, Ttc19, Ndufv1, Dlat, Pdp1, Ndufs5, Cisd1, Acsl6, Ndufs8, Ndufs2, Vdac3, Mtarc2, Ndufs3, Ndufa9, Acad9, Lonp1, Ndufa4, Tmem65, Atp5f1e, Gcsh, Maob, Maoa, Suox, Nt5dc3, Slc25a18, Bcs1l, Pnpt1, Coq7, Mtatp8, Timm50, Aldh1l1, Coq9, Adck5, Bcl2l13, Micu1, Ahcyl1, Nadk2, Slc25a22, Fasn, Prepl, Cpox, Gdap1, Fkbp8, Gls, Bik, Phb2, Comt, Ndufaf5	2.56661e-05	0.295451	Annotated (or known) complexes complexes with new protein subunits
53	Q9CXZ1 Q9DCS9	Ndufs4, Ndufb10	0.00476246	0.53125	Annotated (or known) complexes
54	Q9CPQ1 P17665 P43024 P00405 Q9D172 O35857	Cox6c, Cox7c, Cox6a1, Mtco2, Gatd3, Timm44	8.01802e-07	0.533333	Annotated (or known) complexes
55	Q8BH95 Q9EQ20 Q9D172	Echs1, Aldh6a1, Gatd3	0.996493	0	Novel complexes
56	P56379 Q9QZ23 Q8R1R3 Q9Z1J3 Q78PY7 P36552	Atp5mpl, Nfu1, Stard7, Nfs1, Snd1, Cpox	0.0836886	0.154762	Novel complexes
57	Q9CZ83 Q8CAQ8 Q8BMF4 Q60597 Q9CRB9 P35486	Mrpl55, Immt, Dlat, Ogdh, Chchd3, Pdha1	0.000543684	0.513216	Annotated (or known) complexes
58	Q921H8 Q9Z2I8 Q9WU79 Q9D0S9 Q9CWX4 Q9CQR4 Q99KR7 Q91V12 Q8BWT1 P70349 Q9D1R1 Q8R164 Q8CHT0 P85094 Q3V384 Q80X85	Acaa1a, Suclg2, Prodh, Hint2, Rpusd4, Acot13, Ppif, Acot7, Acaa2, Hint1, Tmem126b, Bphl, Aldh4a1, Isoc2a, Afg1l, Mrps7	0.0725928	0.28125	Novel complexes
59	Q9CPU4 P48771 P00405 Q60932 O35857 P30275	Mgst3, Cox7a2, Mtco2, Vdac1, Timm44, Ckmt1	0.0469737	0.263514	Annotated (or known) complexes complexes with new protein subunits
60	Q8VCH0 Q9CYG7 Q9D8Z2 Q9D1R1 Q9CQ92 Q9JIY5 Q6P8J7	Acaa1b, Tomm34, Triap1, Tmem126b, Fis1, Htra2, Ckmt2	0.0448808	0.321429	Annotated (or known) complexes complexes with new protein subunits
61	Q99MN1 Q8BGY7 Q59J78 P51174	Kars1, Fam210a, Ndufaf2, Acadl	0.0550643	0.225	Novel complexes
62	Q8R3K3 Q9Z2I8 Q9D6Y7 Q8BWT1 Q9D1R1 Q8CHT0 P47199 Q3V384 P42125 Q80X85	Ptcd2, Suclg2, Msra, Acaa2, Tmem126b, Aldh4a1, Cryz, Afg1l, Eci1, Mrps7	0.0550643	0.3	Novel complexes
63	Q9WU79 Q9D799 Q9CQE1 Q99KR7 Q9JHW2 Q9D1R1 Q6P1E7 Q91W43 Q922G0 P24270 Q3V384 Q80X85 Q07813 O08600	Prodh, Mtfmt, Nipsnap3b, Ppif, Nit2, Tmem126b, Primpol, Gldc, Slc25a36, Cat, Afg1l, Mrps7, Bax, Endog	0.0107353	0.238095	Annotated (or known) complexes
64	Q922E6 Q8CBY0	Fastkd2, Gatc	0.0402949	0.333333	Annotated (or known) complexes complexes with new protein subunits
65	Q8K354 Q9JLT4 P51660 Q99KE1 Q9WVA2 Q9CZR8 Q99L13 P62075	Cbr3, Txnrd2, Hsd17b4, Me2, Timm8a1, Tsfm, Hibadh, Timm13	0.000422655	0.625	Annotated (or known) complexes
66	Q9Z2I0 Q8K2B3 P58281 Q9DCZ4 Q9DCN2 Q9CZW5 Q9CPX8 Q9Z1J3 Q9D7B6 P28661 P05132	Letm1, Sdha, Opa1, Apoo, Cyb5r3, Tomm70, Uqcr11, Nfs1, Acad8, Septin4, Prkaca	0.00151243	0.381258	Annotated (or known) complexes complexes with new protein subunits
67	Q8BP40 P52825 Q3UGX3	Acp6, Cpt2, Nat8l	0.996493	0	Novel complexes
68	Q8BH95 Q64433 Q9D172	Echs1, Hspe1, Gatd3	0.996493	0	Novel complexes
69	Q9CYG7 Q9D8Z2 Q91XL9 Q9CQ92 Q9JIY5 Q6P8J7	Tomm34, Triap1, Osbpl1a, Fis1, Htra2, Ckmt2	0.0402949	0.333333	Annotated (or known) complexes complexes with new protein subunits
70	Q91ZA3 Q8BGY7 P56382	Pcca, Fam210a, Atp5f1e	0.0469737	0.266667	Annotated (or known) complexes complexes with new protein subunits
71	Q9CQQ7 Q8BGY7	Atp5pb, Fam210a	0.0448808	0.321429	Annotated (or known) complexes complexes with new protein subunits
72	Q99MN1 Q9CR21 Q9JHI5 Q9CQV7 Q9DBL1 Q9CRA5 Q4VAE3 Q6PB66 Q8BHG1 Q9WV96	Kars1, Ndufab1, Ivd, Dnajc19, Acadsb, Golph3, Tmem65, Lrpprc, Nrdc, Timm10b	0.0934181	0.12439	Novel complexes
73	Q9CQQ7 Q9CPQ8 Q99JR1 Q8VEM8 P63030 P50544 Q9D0M3 Q9CQZ5 Q9CQJ8 Q9CQC7 Q91VM9 Q9DCC8 Q9D8W7 Q9CPP6 Q921G7 Q8CC21 Q9DCS9 Q9DC70 Q9CQ91 Q9CPU2 Q64521 Q9CQN1 Q99LY9 Q91WS0 Q91WC3 Q8K3J1 Q9CQH3 Q91WD5 Q60931 P58281 Q922Q1 Q7TSQ8 Q791V5 Q64445 Q9DCT2 Q9CQ85 Q60932 P67778 P41216 Q9DC69 Q99LC3 Q8JZN5 Q62425 Q9CQV1 Q91WK5 Q8C2E4 Q64133 Q8R086 Q3UHB1 Q9DB41 Q9CZP5 Q8K1R3 Q8BHG1 P97478 Q9D880 Q9D7B6 Q99N92 …	Atp5pb, Atp5mg, Sfxn1, Slc25a3, Mpc1, Acadvl, Cyc1, Ndufa6, Ndufb9, Ndufb4, Ppa2, Tomm20, Ociad2, Ndufa5, Etfdh, Ttc19, Ndufb10, Ndufs7, Ndufa3, Ndufb2, Gpd2, Trap1, Ndufs5, Cisd1, Acsl6, Ndufs8, Ndufb5, Ndufs2, Vdac3, Opa1, Mtarc2, Pdpr, Mtch2, Cox8a, Ndufs3, Timm22, Vdac1, Phb1, Acsl1, Ndufa9, Ndufa10, Acad9, Ndufa4, Pam16, Gcsh, Ptcd1, Maoa, Suox, Nt5dc3, Slc25a18, Bcs1l, Pnpt1, Nrdc, Coq7, Ti…	2.57881e-10	0.360045	Annotated (or known) complexes complexes with new protein subunits
74	Q9CQZ5 Q91VM9 P56379 P00158	Ndufa6, Ppa2, Atp5mpl, Mt-Cyb	0.0101961	0.391304	Annotated (or known) complexes complexes with new protein subunits
75	Q9CQZ5 Q91VM9 Q9DCS9 Q78IK2	Ndufa6, Ppa2, Ndufb10, Atp5mk	0.0101961	0.391304	Annotated (or known) complexes complexes with new protein subunits
76	Q9CZU6 Q80Y14 Q99KE1	Cs, Glrx5, Me2	0.0563952	0.238095	Novel complexes
77	Q9JJW0 Q9D404 Q9CZS1 Q9CQY6	Pxmp4, Oxsm, Aldh1b1, Uqcc2	0.0469737	0.25	Annotated (or known) complexes complexes with new protein subunits
78	Q9D1R1 Q8CFA2 Q3V384	Tmem126b, Amt, Afg1l	0.0235032	0.416667	Annotated (or known) complexes complexes with new protein subunits
79	Q9CQA3 Q9CR21 Q9JHI5 Q9CQV7 Q91V61 Q9WVA2 Q9CRA5 Q4VAE3 Q8BX10 Q9WV96 Q9JIQ3 Q8VCX5	Sdhb, Ndufab1, Ivd, Dnajc19, Sfxn3, Timm8a1, Golph3, Tmem65, Pgam5, Timm10b, Diablo, Micu1	0.0494574	0.263216	Annotated (or known) complexes complexes with new protein subunits
80	Q8R3K3 Q91WK1 Q8BWT1 P52196	Ptcd2, Spryd4, Acaa2, Tst	0.996493	0	Novel complexes
81	Q9CQA3 Q922Q4 Q60597 Q4VAE3 Q6PB66 Q9WV96 P16332	Sdhb, Pycr2, Ogdh, Tmem65, Lrpprc, Timm10b, Mmut	0.0563952	0.238095	Novel complexes
82	P99028 Q8R3J4 Q9CQV7 Q9CPQ8 Q99JR1 Q91V61 Q8BH59 P50544 Q9CQJ8 Q91VM9 Q9DCC8 Q9D8W7 Q9CQ75 Q9CPP6 Q921G7 Q8JZQ2 Q9CQ91 Q9CPU2 Q64521 Q99LY9 Q91WC3 Q9DB10 Q9D6J5 Q9D173 Q9CRD0 Q9CQ54 Q8K3J1 Q791T5 Q3UIU2 Q9CQH3 Q91WD5 Q7TSQ8 Q64445 Q5U458 P48771 Q9DCT2 Q9CQ85 P67778 P41216 Q64373 Q9D2R6 Q99LC3 Q62425 Q9CQV1 Q8C2E4 Q9DB41 Q8BHG1 P97478 Q9D7B6 P59017 P56135 Q9D6M3 Q8BK30 P52503 P35487 P00158 O35465 …	Uqcrh, Mterf3, Dnajc19, Atp5mg, Sfxn1, Sfxn3, Slc25a12, Acadvl, Ndufb9, Ppa2, Tomm20, Ociad2, Ndufa2, Ndufa5, Etfdh, Afg3l2, Ndufa3, Ndufb2, Gpd2, Ndufs5, Acsl6, Smdt1, Ndufb8, Tomm7, Ociad1, Ndufc2, Ndufs8, Mtch1, Ndufb6, Ndufb5, Ndufs2, Pdpr, Cox8a, Dnajc11, Cox7a2, Ndufs3, Timm22, Phb1, Acsl1, Bcl2l1, Coa3, Ndufa10, Ndufa4, Pam16, Ptcd1, Slc25a18, Nrdc, Coq7, Acad8, Bcl2l13, Atp5mf, Slc25a22, …	7.09258e-13	0.411287	Annotated (or known) complexes complexes with new protein subunits
83	Q9CYH2 Q9CQV7 Q99JR1 Q8BH59 P50544 Q9CQJ8 Q9D8W7 Q9CPP6 Q921G7 Q9CQZ6 Q9CQ91 Q9CPU2 Q64521 Q99LY9 Q9CQ54 Q8K3J1 Q9CQH3 Q91WD5 Q5U458 Q9DCT2 Q9D2R6 Q99LC3 Q9CQV1 Q9DB41 Q8BHG1 P56135 O88741 O35129	Prxl2a, Dnajc19, Sfxn1, Slc25a12, Acadvl, Ndufb9, Ociad2, Ndufa5, Etfdh, Ndufb3, Ndufa3, Ndufb2, Gpd2, Ndufs5, Ndufc2, Ndufs8, Ndufb5, Ndufs2, Dnajc11, Ndufs3, Coa3, Ndufa10, Pam16, Slc25a18, Nrdc, Atp5mf, Gdap1, Phb2	3.57691e-06	0.361076	Annotated (or known) complexes complexes with new protein subunits
84	Q9D1L0 O08709	Chchd2, Prdx6	0.996493	0	Novel complexes
85	Q9CQA3 Q9CR21 Q9JHI5 Q9CQV7 Q99LY9 Q9CRA5 Q4VAE3 Q8BX10 Q9WV96 Q9JIQ3 Q8VCX5	Sdhb, Ndufab1, Ivd, Dnajc19, Ndufs5, Golph3, Tmem65, Pgam5, Timm10b, Diablo, Micu1	0.00163143	0.299754	Annotated (or known) complexes complexes with new protein subunits
86	Q9CYH2 Q9CQV7 Q9CPQ8 Q91V61 Q8BH59 P50544 Q921G7 Q9CQ91 Q9CPU2 Q64521 Q99LY9 Q9CQ54 Q8K3J1 Q9CQH3 Q91WD5 Q61387 Q9DCT2 Q9CQ85 Q99LC3 Q9CQV1 P59017 P56135 Q7TMF3 O88741 O35129	Prxl2a, Dnajc19, Atp5mg, Sfxn3, Slc25a12, Acadvl, Etfdh, Ndufa3, Ndufb2, Gpd2, Ndufs5, Ndufc2, Ndufs8, Ndufb5, Ndufs2, Cox7a2l, Ndufs3, Timm22, Ndufa10, Pam16, Bcl2l13, Atp5mf, Ndufa12, Gdap1, Phb2	2.44938e-06	0.377445	Annotated (or known) complexes complexes with new protein subunits
87	Q9Z2I8 Q91WK1 Q8BWT1 Q8CHT0 P85094 Q80X85	Suclg2, Spryd4, Acaa2, Aldh4a1, Isoc2a, Mrps7	0.0402949	0.333333	Annotated (or known) complexes complexes with new protein subunits
88	Q9Z2I8 Q9D799 Q8CHT0 P85094	Suclg2, Mtfmt, Aldh4a1, Isoc2a	0.0299128	0.375	Annotated (or known) complexes complexes with new protein subunits
89	Q9D6R2 Q9Z2I0 Q8K2B3 Q9DCZ4 Q9DCN2 Q9CZW5 Q9CPX8 Q8BW75 P28661 P19096 P05132	Idh3a, Letm1, Sdha, Apoo, Cyb5r3, Tomm70, Uqcr11, Maob, Septin4, Fasn, Prkaca	0.00151243	0.381258	Annotated (or known) complexes complexes with new protein subunits
90	Q9JLJ2 Q9Z2I0 Q9WV98 Q99LY9 Q9DCZ4 Q8VCW8 Q8R3F5 Q8CGK3 Q571F8 Q8BIP0 Q8QZT1 Q3URE1 O88696	Aldh9a1, Letm1, Timm9, Ndufs5, Apoo, Acsf2, Mcat, Lonp1, Gls2, Dars2, Acat1, Acsf3, Clpp	0.0650898	0.288462	Novel complexes
91	Q9D6R2 Q9Z2I0 Q9CPX8 Q8CGK3 Q8C5H8 P28661	Idh3a, Letm1, Uqcr11, Lonp1, Nadk2, Septin4	0.0959861	0.180751	Novel complexes
92	Q9CQA3 Q99JR1 Q91V61 Q9Z2I0 Q9CQN1 Q8K2B3 Q9DCZ4 Q9DCN2 Q9CZW5 Q9CPX8 P41216 Q8CGK3 Q8BW75 Q8K1Z0 Q8C5H8 P28661 P19096 P05132 Q8C167 D3Z7P3	Sdhb, Sfxn1, Sfxn3, Letm1, Trap1, Sdha, Apoo, Cyb5r3, Tomm70, Uqcr11, Acsl1, Lonp1, Maob, Coq9, Nadk2, Septin4, Fasn, Prkaca, Prepl, Gls	0.0295651	0.244824	Annotated (or known) complexes
93	Q3UV70 Q9CPX8 Q922Q4 Q4VAE3 O70337	Pdp1, Uqcr11, Pycr2, Tmem65, Bik	0.0469737	0.266667	Annotated (or known) complexes complexes with new protein subunits
94	Q9CQA3 Q9CYH2 Q99JR1 Q91V61 Q8VEM8 Q8CC21 Q9Z2I0 Q9WV98 Q99LY9 Q91WS0 Q91WD5 Q8K2B3 Q9DCZ4 Q9CRA5 Q62425 Q8BW75 Q64133 Q8R086 Q3UHB1 Q9CZP5 Q8K1R3 P03930 P59017 P56135 Q8VCX5 Q80SW1 P28661 Q78PY7 P05132 O88741	Sdhb, Prxl2a, Sfxn1, Sfxn3, Slc25a3, Ttc19, Letm1, Timm9, Ndufs5, Cisd1, Ndufs2, Sdha, Apoo, Golph3, Ndufa4, Maob, Maoa, Suox, Nt5dc3, Bcs1l, Pnpt1, Mtatp8, Bcl2l13, Atp5mf, Micu1, Ahcyl1, Septin4, Snd1, Prkaca, Gdap1	0.00350455	0.26417	Annotated (or known) complexes complexes with new protein subunits
95	Q9D6U8 Q9CQA3 Q9CYH2 Q9CQQ7 Q9CPQ8 Q91V61 Q8BH59 P63030 P50544 Q8R1R3 Q8CC21 Q3UV70 Q91WS0 Q91WC3 Q91WD5 Q8K2B3 P58281 Q78IK2 Q9CZW5 Q9CPX8 Q59J78 Q9CRA5 Q9D9V3 Q8JZN5 Q62425 P56382 P51174 Q91WK5 Q8BW75 Q8R086 Q5SV80 Q9DB41 Q9CZP5 Q8K1R3 P97478 Q9D880 Q8K1Z0 Q80V03 P56135 Q8VCX5 Q80SW1 P54116 P16332 P19096 O88741 O70337 O35465 Q8C167 A2APY7	Fam162a, Sdhb, Prxl2a, Atp5pb, Atp5mg, Sfxn3, Slc25a12, Mpc1, Acadvl, Stard7, Ttc19, Pdp1, Cisd1, Acsl6, Ndufs2, Sdha, Opa1, Atp5mk, Tomm70, Uqcr11, Ndufaf2, Golph3, Echdc1, Acad9, Ndufa4, Atp5f1e, Acadl, Gcsh, Maob, Suox, Myo19, Slc25a18, Bcs1l, Pnpt1, Coq7, Timm50, Coq9, Adck5, Atp5mf, Micu1, Ahcyl1, Stom, Mmut, Fasn, Gdap1, Bik, Fkbp8, Prepl, Ndufaf5	0.012595	0.223321	Annotated (or known) complexes
96	Q8VCH0 Q3UUI3 Q9D1R1 Q9R257 P24270	Acaa1b, Them4, Tmem126b, Hebp1, Cat	0.035911	0.35	Annotated (or known) complexes complexes with new protein subunits
97	Q9JJW0 Q922B1 Q78J03 Q8BH04 P52760	Pxmp4, Macrod1, Msrb2, Pck2, Rida	0.0550643	0.225	Novel complexes
98	Q9DCJ5 Q9D6J6 Q8R1I1 P99028 Q9CQQ7 Q9CPQ8 Q91V61 P63030 P50544 Q9CQJ8 Q91VM9 Q9CPP6 Q8CC21 Q91YT0 Q64521 Q99LY9 Q8K3J1 Q91WD5 P58281 Q9DCT2 Q9CQ85 P67778 P41216 Q9DC69 Q62425 Q9CQV1 Q91WK5 Q8K1R3 Q8BHG1 Q9D880 Q9D7B6 Q8K1Z0 Q80V03 P59017 P56135 Q99J39 Q7TMF3 Q8BK30 Q8BH86 Q4KMM3 O35465 O35129 A2APY7 D3Z7P3	Ndufa8, Ndufv2, Uqcr10, Uqcrh, Atp5pb, Atp5mg, Sfxn3, Mpc1, Acadvl, Ndufb9, Ppa2, Ndufa5, Ttc19, Ndufv1, Gpd2, Ndufs5, Ndufs8, Ndufs2, Opa1, Ndufs3, Timm22, Phb1, Acsl1, Ndufa9, Ndufa4, Pam16, Gcsh, Pnpt1, Nrdc, Timm50, Acad8, Coq9, Adck5, Bcl2l13, Atp5mf, Mlycd, Ndufa12, Ndufv3, Dglucy, Oxr1, Fkbp8, Phb2, Ndufaf5, Gls	1.10982e-07	0.352723	Annotated (or known) complexes complexes with new protein subunits
99	Q99LY9 Q8K1M6 P51881 P41216 Q99JB2 Q8BGY7 Q9D6K8 O70337	Ndufs5, Dnm1l, Slc25a5, Acsl1, Stoml2, Fam210a, Fundc2, Bik	0.036004	0.323513	Annotated (or known) complexes complexes with new protein subunits
100	Q8QZS1 P70349	Hibch, Hint1	0.0299128	0.375	Annotated (or known) complexes complexes with new protein subunits
101	Q9WUR2 O35980 Q8VE95 Q8VCE6 Q8CAK1 Q6P8J7 Q8K4F5 Q64520	Eci2, Nthl1, CH082_MOUSE, Nt5m, Iba57, Ckmt2, Abhd11, Guk1	0.996493	0.0982143	Novel complexes
102	Q9WUR2 Q9CQR4 Q99KB8 Q9DB15 Q8R4N0 Q9DCM0 Q9D6S7 Q9CYW4 P97823 Q8K2C6 Q9Z2Y8 Q9WVL0 Q9CQ62 Q91VT4 Q8BYM8 Q8K1J6 Q8VE95 Q8VCE6 Q6P8J7 Q61578 P52825 P50171 P38060 Q9QYR9 Q8C460 O09174 Q8CIW5	Eci2, Acot13, Hagh, Mrpl12, Clybl, Ethe1, Mrrf, Hdhd3, Lypla1, Sirt5, Plpbp, Gstz1, Decr1, Cbr4, Cars2, Trnt1, CH082_MOUSE, Nt5m, Ckmt2, Fdxr, Cpt2, Hsd17b8, Hmgcl, Acot2, Eri3, Amacr, Twnk	0.0166384	0.162698	Annotated (or known) complexes
103	Q8R3J4 Q9CR61 Q9CQZ6 Q9CQ91 Q9CPU2 Q9D6J5 Q9D173 Q9CRD0 Q9CQ54 Q791T5 Q3UIU2 Q9CQH3 Q99LC3 O09111 P52503	Mterf3, Ndufb7, Ndufb3, Ndufa3, Ndufb2, Ndufb8, Tomm7, Ociad1, Ndufc2, Mtch1, Ndufb6, Ndufb5, Ndufa10, Ndufb11, Ndufs6	4.17016e-09	0.454054	Annotated (or known) complexes complexes with new protein subunits
104	Q9DC70 Q3TQB2 Q8BH86 P00158	Ndufs7, Foxred1, Dglucy, Mt-Cyb	0.00206484	0.405612	Annotated (or known) complexes complexes with new protein subunits
105	Q9CR68 Q5M8N4 Q9CPS6	Uqcrfs1, Sdr39u1, Hint3	0.0563952	0.238095	Novel complexes
106	Q8R4H7 Q3TL44	Nags, Nlrx1	0.996493	0	Novel complexes
107	Q921H8 Q9CQR4 Q9DB15 Q9DCM2 Q8R4N0 Q9CY16 Q3UNZ8 Q9DCM0 Q9CYW4 P97823 P56380 Q8K2C6 Q9Z2Y8 Q9WVL0 Q9DBM2 Q9CQ62 Q91VT4 Q8BYM8 Q8K1J6 Q7TMV3 Q61578 P62075 P52825 P50171 P38060 Q9QYR9 Q8C460 O09174 P09671 Q8CIW5	Acaa1a, Acot13, Mrpl12, Gstk1, Clybl, Mrps28, Cryzl2, Ethe1, Hdhd3, Lypla1, Nudt2, Sirt5, Plpbp, Gstz1, Ehhadh, Decr1, Cbr4, Cars2, Trnt1, Fastkd5, Fdxr, Timm13, Cpt2, Hsd17b8, Hmgcl, Acot2, Eri3, Amacr, Sod2, Twnk	0.00219233	0.209524	Annotated (or known) complexes
108	Q9WUR2 Q8K2C6 Q91VT4 P28352 Q8C460 Q80SX8	Eci2, Sirt5, Cbr4, Apex1, Eri3, Pif1	0.0402949	0.333333	Annotated (or known) complexes complexes with new protein subunits
109	Q9D0S9 Q8CHT0 P52196	Hint2, Aldh4a1, Tst	0.996493	0	Novel complexes
110	Q64521 Q8JZS9	Gpd2, Mrpl48	0.996493	0.257042	Novel complexes
111	Q8BMS1 P97493 Q9WV98 Q9DC61 Q91XL9 Q9JMH6 Q91V92 Q59J78 Q9EQ80 Q9D9V3 Q922Q4 Q60759 Q4VAE3 Q3UHB1 P35486 P47738 P09528	Hadha, Txn2, Timm9, Pmpca, Osbpl1a, Txnrd1, Acly, Ndufaf2, Nif3l1, Echdc1, Pycr2, Gcdh, Tmem65, Nt5dc3, Pdha1, Aldh2, Fth1	0.0741563	0.279412	Novel complexes
112	Q9D3D9 P54116	Atp5f1d, Stom	0.0169804	0.5	Annotated (or known) complexes
113	Q9D799 Q99KB8 P32020	Mtfmt, Hagh, Scp2	0.0836886	0.202381	Novel complexes
114	P38060 P28352	Hmgcl, Apex1	0.0893167	0.504405	Annotated (or known) complexes
115	Q921H8 Q9DCV6 Q8BMS1 Q9WUR2 Q9Z2I8 Q9DCS3 Q9CWX4 Q9CQR4 Q99KB8 Q8VCH0 Q8BWT1 Q8R4N0 Q9WUR9 Q9CY16 Q3UUI3 Q3UNZ8 P70349 Q9JLJ2 Q9DCM0 Q91Z53 Q3TC72 Q9D6S7 Q9CYW4 P97823 P56380 Q8K2C6 Q9D023 Q9Z2Y8 Q9WVL0 Q9DBM2 Q9CQ62 Q9CPV4 Q99NB1 Q91VT4 Q8VE38 Q8BYM8 Q8K1J6 Q9JIY5 Q8VE95 Q8VCE6 Q8CHT0 Q8CAK1 Q8BGC4 Q7TMV3 Q6P8J7 P99029 P85094 P58044 P52825 P50171 P47199 P38060 Q91VA6 Q9D113 Q9QYR9 Q8K4F5 Q3V132 …	Acaa1a, Dele1, Hadha, Eci2, Suclg2, Mecr, Rpusd4, Acot13, Hagh, Acaa1b, Acaa2, Clybl, Ak4, Mrps28, Them4, Cryzl2, Hint1, Aldh9a1, Ethe1, Grhpr, Fahd2, Mrrf, Hdhd3, Lypla1, Nudt2, Sirt5, Mpc2, Plpbp, Gstz1, Ehhadh, Decr1, Glod4, Acss1, Cbr4, Oxnad1, Cars2, Trnt1, Htra2, CH082_MOUSE, Nt5m, Aldh4a1, Iba57, Ptgr3, Fastkd5, Ckmt2, Prdx5, Isoc2a, Idi1, Cpt2, Hsd17b8, Cryz, Hmgcl, Poldip2, Dnlz, Acot2, …	0.00113052	0.253247	Annotated (or known) complexes complexes with new protein subunits
116	Q8BMF3 O35435	Me3, Dhodh	0.996493	0	Novel complexes
117	Q91VT4 Q9JIY5 P28352	Cbr4, Htra2, Apex1	0.0328201	0.506608	Annotated (or known) complexes
118	P50544 Q921G7 Q8JZQ2 Q9CQZ6 Q9CQ91 Q9CPU2 Q9D6J5 Q9D173 Q9CQ54 Q791T5 Q9CQH3 Q91WD5 Q9D2R6 Q99LC3 Q9CQV1 Q9DB41 Q8BHG1	Acadvl, Etfdh, Afg3l2, Ndufb3, Ndufa3, Ndufb2, Ndufb8, Tomm7, Ndufc2, Mtch1, Ndufb5, Ndufs2, Coa3, Ndufa10, Pam16, Slc25a18, Nrdc	2.66978e-05	0.357066	Annotated (or known) complexes complexes with new protein subunits
119	P51660 P47934	Hsd17b4, Crat	0.00112937	0.571429	Annotated (or known) complexes
120	Q9CYH2 Q9CR62 Q9CQT9 Q9CPQ8 Q91V61 Q921G7 Q99LY9 Q91WC3 Q8K3J1 Q91WD5 Q61387 Q7TSQ8 Q7TNE1 Q5U458 Q9DCT2 Q9DB41 P97478 P35487 O88741 O35465	Prxl2a, Slc25a11, Rab5if, Atp5mg, Sfxn3, Etfdh, Ndufs5, Acsl6, Ndufs8, Ndufs2, Cox7a2l, Pdpr, Sugct, Dnajc11, Ndufs3, Slc25a18, Coq7, Pdha2, Gdap1, Fkbp8	0.00995194	0.272026	Annotated (or known) complexes complexes with new protein subunits
121	Q7TMV3 Q99LB7	Fastkd5, Sardh	0.0603842	0.291667	Novel complexes
122	Q9CQV7 Q99JR1 Q9CQ54 Q9CQH3 Q9CQ85 Q9D2R6 Q9CQV1 Q8BHG1 P59017 Q8VE22	Dnajc19, Sfxn1, Ndufc2, Ndufb5, Timm22, Coa3, Pam16, Nrdc, Bcl2l13, Mrps23	0.0298588	0.265244	Annotated (or known) complexes complexes with new protein subunits
123	Q9D6S7 Q8CFA2 P11352	Mrrf, Amt, Gpx1	0.996493	0.183908	Novel complexes
124	Q9CZ13 Q91YT0	Uqcrc1, Ndufv1	0.00995194	0.520408	Annotated (or known) complexes
125	Q9CYH2 Q9CQV7 Q8BH59 P50544 Q9D8W7 Q921G7 Q99LY9 Q9D6J5 Q9CQ54 Q8K3J1 Q791T5 Q9CQH3 Q91WD5 Q61387 Q922Q1 Q9D2R6 Q99LC3 Q9CQV1 Q9DB41 P56135 Q8BK30 O88741 O35465	Prxl2a, Dnajc19, Slc25a12, Acadvl, Ociad2, Etfdh, Ndufs5, Ndufb8, Ndufc2, Ndufs8, Mtch1, Ndufb5, Ndufs2, Cox7a2l, Mtarc2, Coa3, Ndufa10, Pam16, Slc25a18, Atp5mf, Ndufv3, Gdap1, Fkbp8	0.00270512	0.287301	Annotated (or known) complexes complexes with new protein subunits
126	Q9CYH2 Q9D8W7 Q8VC19 Q61387 Q9D023 Q9JMH6 Q99JB2 Q80XN0 Q8CFA2 Q8R0Y6 Q3V132 Q9D6M3 Q8K0D5 P35487 A2ATU0	Prxl2a, Ociad2, Alas1, Cox7a2l, Mpc2, Txnrd1, Stoml2, Bdh1, Amt, Aldh1l1, Slc25a31, Slc25a22, Gfm1, Pdha2, Dhtkd1	0.069721	0.283333	Novel complexes
127	Q8R1R3 Q9WV98 Q99LY9 P51881 Q99L13 Q8BGY7 P56382 P09528	Stard7, Timm9, Ndufs5, Slc25a5, Hibadh, Fam210a, Atp5f1e, Fth1	0.0191864	0.268018	Annotated (or known) complexes complexes with new protein subunits
128	Q9D6U8 Q8BH59 P63030 P50544 Q3UV70 Q91WC3 Q8K3J1 P58281 Q78IK2 Q9DCN2 Q9CPX8 Q9D9V3 Q922Q4 Q8JZN5 P56382 Q91WK5 Q5SV80 Q9Z1J3 Q9DB41 P97478 Q9D880 Q8K1Z0 Q80V03 P19096 O70337 O35465 Q8C167 A2APY7	Fam162a, Slc25a12, Mpc1, Acadvl, Pdp1, Acsl6, Ndufs8, Opa1, Atp5mk, Cyb5r3, Uqcr11, Echdc1, Pycr2, Acad9, Atp5f1e, Gcsh, Myo19, Nfs1, Slc25a18, Coq7, Timm50, Coq9, Adck5, Fasn, Bik, Fkbp8, Prepl, Ndufaf5	0.0367626	0.220658	Annotated (or known) complexes
129	Q9D7P6 Q91WK1	Iscu, Spryd4	0.0235032	0.416667	Annotated (or known) complexes complexes with new protein subunits
130	Q9CR68 Q9WVA2 P62075 P09528	Uqcrfs1, Timm8a1, Timm13, Fth1	0.00250059	0.403302	Annotated (or known) complexes complexes with new protein subunits
131	P97493 Q9D404 Q9CQY6 O35435	Txn2, Oxsm, Uqcc2, Dhodh	0.996493	0	Novel complexes
132	Q9DBM2 Q7TMV3 Q3TIU4 P11352	Ehhadh, Fastkd5, Pde12, Gpx1	0.0909884	0.166667	Novel complexes
133	Q8K2B3 Q9DCZ4 Q9CZW5 Q9CPX8 Q8BW75 Q64133 P28661 P05132	Sdha, Apoo, Tomm70, Uqcr11, Maob, Maoa, Septin4, Prkaca	0.0062238	0.388216	Annotated (or known) complexes complexes with new protein subunits
134	Q8QZS1 Q9DCV6 Q9WUR2 Q9DCS3 Q9CWX4 Q9CQR4 Q9DB15 Q8R4N0 Q9CY16 Q6NSW3 Q3UNZ8 Q9JLJ2 Q9DCM0 Q91Z53 Q3TC72 Q9CYW4 P97823 P56380 Q99LB2 Q8K2C6 Q9Z2Y8 Q9WVL0 Q9JK81 Q9D0D3 Q9CQ62 Q9CPY7 Q99NB1 Q91XL9 Q8VE38 Q8BYM8 Q8CG76 Q8K1J6 P99029 P52825 P50171 P38060 Q91VA6 Q9D113 Q9QYR9 Q8VDC0 P34914 P09671 Q80XL6 Q8K009 Q8R0N6 Q8K3A0 Q8CCT7 Q80SX8 Q8K0Z7 Q3UGX3 Q8CIW5 B7ZMP1	Hibch, Dele1, Eci2, Mecr, Rpusd4, Acot13, Mrpl12, Clybl, Mrps28, Sphkap, Cryzl2, Aldh9a1, Ethe1, Grhpr, Fahd2, Hdhd3, Lypla1, Nudt2, Dhrs4, Sirt5, Plpbp, Gstz1, Myg1, Mtpap, Decr1, Lap3, Acss1, Osbpl1a, Oxnad1, Cars2, Akr7a2, Trnt1, Prdx5, Cpt2, Hsd17b8, Hmgcl, Poldip2, Dnlz, Acot2, Lars2, Ephx2, Sod2, Acad11, Aldh1l2, Adhfe1, Hscb, Nsun3, Pif1, Taco1, Nat8l, Twnk, Xpnpep3	0.0603422	0.135989	Novel complexes
135	Q9DC50 Q8BMF3 Q80XL6	Crot, Me3, Acad11	0.0836886	0.202381	Novel complexes
136	Q8R3J4 Q9CQV7 P63030 Q9CQ91 Q9CPU2 Q64521 Q9D6J5 Q9CRD0 Q9CQ54 Q8K3J1 Q791T5 Q9CQH3 Q91WD5 Q61387 Q9CQ85 Q9D2R6 Q99LC3 Q9CQV1 Q60930 Q9DB41 Q8BHG1 P97478 P59017 Q9D6M3 Q8BK30 Q4KMM3 O35129	Mterf3, Dnajc19, Mpc1, Ndufa3, Ndufb2, Gpd2, Ndufb8, Ociad1, Ndufc2, Ndufs8, Mtch1, Ndufb5, Ndufs2, Cox7a2l, Timm22, Coa3, Ndufa10, Pam16, Vdac2, Slc25a18, Nrdc, Coq7, Bcl2l13, Slc25a22, Ndufv3, Oxr1, Phb2	0.00114786	0.290096	Annotated (or known) complexes complexes with new protein subunits
137	Q9DCB8 Q8K009	Isca2, Aldh1l2	0.0169804	0.5	Annotated (or known) complexes
138	Q8JZQ2 Q9DB10 Q9D6J5 Q9D173 Q9CRD0 Q9CQ54 Q8K3J1 Q791T5 Q9CQH3 Q91WD5 Q7TSQ8 Q9CQ85 Q64373 Q9D2R6 Q99LC3 Q9CQV1 Q60930	Afg3l2, Smdt1, Ndufb8, Tomm7, Ociad1, Ndufc2, Ndufs8, Mtch1, Ndufb5, Ndufs2, Pdpr, Timm22, Bcl2l1, Coa3, Ndufa10, Pam16, Vdac2	0.000518364	0.347758	Annotated (or known) complexes complexes with new protein subunits
139	Q9CR62 Q9CPQ3 Q791V5 Q3ULD5	Slc25a11, Tomm22, Mtch2, Mccc2	0.0299128	0.375	Annotated (or known) complexes complexes with new protein subunits
140	Q9DCX2 Q91VR2 Q8BH59 P50544 Q91WS0 Q06185 P58281 Q9DCZ4 Q9DCN2 Q9CZW5 Q9CPX8 P67778 P56382 Q9D3D9 Q64133 Q8R086 P03930 Q99N92 Q8K1Z0 Q80V03 Q80SW1 P28661 D3Z7P3	Atp5pd, Atp5f1c, Slc25a12, Acadvl, Cisd1, Atp5me, Opa1, Apoo, Cyb5r3, Tomm70, Uqcr11, Phb1, Atp5f1e, Atp5f1d, Maoa, Suox, Mtatp8, Mrpl27, Coq9, Adck5, Ahcyl1, Septin4, Gls	0.000144976	0.335185	Annotated (or known) complexes complexes with new protein subunits
141	Q9CPQ8 Q8VEM8 P50544 Q91V92 Q9D051 Q922Q4 Q60597 Q6PB66 Q99N92 O08749 P35486	Atp5mg, Slc25a3, Acadvl, Acly, Pdhb, Pycr2, Ogdh, Lrpprc, Mrpl27, Dld, Pdha1	0.0089919	0.3336	Annotated (or known) complexes complexes with new protein subunits
142	Q9WTP7 Q9D1I5 Q9DCM2 Q9CY16 Q9JHW2 Q91W43 P58044 Q64520 P09671	Ak3, Mcee, Gstk1, Mrps28, Nit2, Gldc, Idi1, Guk1, Sod2	0.996493	0.115516	Novel complexes
143	Q9DB77 Q9D6J6 Q9CZ13	Uqcrc2, Ndufv2, Uqcrc1	0.000669326	0.530612	Annotated (or known) complexes
144	Q91YP0 Q59J78 Q9D404 Q9CQY6 Q922H2 Q60759 Q07417	L2hgdh, Ndufaf2, Oxsm, Uqcc2, Pdk3, Gcdh, Acads	0.0754881	0.171429	Novel complexes
145	Q9D1I5 Q9JHW2 Q3V384 P42125	Mcee, Nit2, Afg1l, Eci1	0.996493	0	Novel complexes
146	Q9DCJ5 Q9CQ69 P56379	Ndufa8, Uqcrq, Atp5mpl	0.00328562	0.516304	Annotated (or known) complexes
147	Q9DBF1 O35435	Aldh7a1, Dhodh	0.996493	0	Novel complexes
148	Q8R4N0 Q9CYW4 P97823 P56380 Q99LB2 Q8K2C6 Q9Z2Y8 Q9WVL0 Q9DBM2 Q9CQ62 Q91VT4 Q8BYM8 Q8K1J6 P62075 P52825 P50171 P38060 Q91VA6 Q9QYR9 Q8C460 Q3TIU4 O09174 Q8CIW5	Clybl, Hdhd3, Lypla1, Nudt2, Dhrs4, Sirt5, Plpbp, Gstz1, Ehhadh, Decr1, Cbr4, Cars2, Trnt1, Timm13, Cpt2, Hsd17b8, Hmgcl, Poldip2, Acot2, Eri3, Pde12, Amacr, Twnk	0.0112767	0.17236	Annotated (or known) complexes
149	Q8BIJ6 P97493 Q9DC61 Q9JMH6 Q59J78 Q9EQ80 Q3UHB1	Iars2, Txn2, Pmpca, Txnrd1, Ndufaf2, Nif3l1, Nt5dc3	0.0448808	0.321429	Annotated (or known) complexes complexes with new protein subunits
150	Q9DCW4 Q99LC5 Q8BH04 P51660	Etfb, Etfa, Pck2, Hsd17b4	0.000100893	0.75	Annotated (or known) complexes
151	Q9CXZ1 P52503	Ndufs4, Ndufs6	0.00476246	0.53125	Annotated (or known) complexes
152	Q9DB77 Q9CZ13 Q9CQ69 Q8R1I1 Q9DCS9 Q64373	Uqcrc2, Uqcrc1, Uqcrq, Uqcr10, Ndufb10, Bcl2l1	0.000543684	0.513216	Annotated (or known) complexes
153	P56480 Q9DB77 Q9CZ13 Q9CQ69 Q8R1I1 Q64373	Atp5f1b, Uqcrc2, Uqcrc1, Uqcrq, Uqcr10, Bcl2l1	0.000543684	0.513216	Annotated (or known) complexes
154	Q9D6U8 Q9CWU6 Q9DC61 Q99L04 Q8CGK3 Q60759 P62075 P54116	Fam162a, Uqcc1, Pmpca, Dhrs1, Lonp1, Gcdh, Timm13, Stom	0.0469737	0.3125	Annotated (or known) complexes complexes with new protein subunits
155	Q9CQ69 Q3TQB2	Uqcrq, Foxred1	0.00995194	0.520408	Annotated (or known) complexes
156	Q9DB77 Q9D6J6 P99028 Q91YT0 Q64521 Q91WD5 Q7TSQ8 Q9DC69 Q3TQB2 Q8BH86	Uqcrc2, Ndufv2, Uqcrh, Ndufv1, Gpd2, Ndufs2, Pdpr, Ndufa9, Foxred1, Dglucy	1.34346e-07	0.456338	Annotated (or known) complexes complexes with new protein subunits
157	Q6P1E7 Q9CQH3	Primpol, Ndufb5	0.0681228	0.285714	Novel complexes
158	P56480 Q9DCX2 Q9DB77 Q9CZ13 Q8R1I1 Q8CCM6	Atp5f1b, Atp5pd, Uqcrc2, Uqcrc1, Uqcr10, Timm21	3.65839e-06	0.532609	Annotated (or known) complexes
159	P99028 Q9CR68	Uqcrh, Uqcrfs1	0.000627605	0.6	Annotated (or known) complexes
160	Q9Z2I8 Q9WTP7 Q9D1I5 Q9DCM2 Q8R4N0 Q3UUI3 Q3UNZ8 Q9JHW2 Q8R164 P97823 Q8CAK1 P85094 P58044 Q64520 Q61425 P54071 P09671	Suclg2, Ak3, Mcee, Gstk1, Clybl, Them4, Cryzl2, Nit2, Bphl, Lypla1, Iba57, Isoc2a, Idi1, Guk1, Hadh, Idh2, Sod2	0.0741563	0.279412	Novel complexes
161	Q9DCS3 Q9CQE1 Q91WK1	Mecr, Nipsnap3b, Spryd4	0.996493	0	Novel complexes
162	Q9WTP7 Q9D6Y7 Q9D0S9 Q99KR7 Q99KB8 Q8VCH0 Q8BWT1 Q8CHT0 P32020 Q3V384 Q80X85	Ak3, Msra, Hint2, Ppif, Hagh, Acaa1b, Acaa2, Aldh4a1, Scp2, Afg1l, Mrps7	0.996493	0.142972	Novel complexes
163	Q9CZ13 Q8R1I1 Q9CPP6 Q99LC3	Uqcrc1, Uqcr10, Ndufa5, Ndufa10	3.71845e-05	0.540816	Annotated (or known) complexes
164	Q9CQA3 Q9JHI5 Q9CYH2 Q99JR1 Q91V61 P63030 Q8CC21 Q8BFR5 Q3UV70 Q9Z2I0 Q9CQN1 Q99LY9 Q8CGK3 Q62425 Q4VAE3 Q3UHB1 Q9Z1J3 Q9DB41 Q8K1R3 P97478 Q8R0Y6 Q8K1Z0 Q80V03 Q3TBW2 Q8VCX5 Q8C5H8 Q9CPW2 Q8C167 D3Z7P3 O70337 A2APY7	Sdhb, Ivd, Prxl2a, Sfxn1, Sfxn3, Mpc1, Ttc19, Tufm, Pdp1, Letm1, Trap1, Ndufs5, Lonp1, Ndufa4, Tmem65, Nt5dc3, Nfs1, Slc25a18, Pnpt1, Coq7, Aldh1l1, Coq9, Adck5, Mrpl10, Micu1, Nadk2, Fdx2, Prepl, Gls, Bik, Ndufaf5	0.0134116	0.238312	Annotated (or known) complexes
165	Q8BH59 Q921G7 Q91WS0 Q9DCN2 P30275	Slc25a12, Etfdh, Cisd1, Cyb5r3, Ckmt1	0.0777188	0.214085	Novel complexes
166	Q9CYH2 Q9CR62 Q9CQT9 Q61387 Q60931 Q9CPQ3 Q7TNE1	Prxl2a, Slc25a11, Rab5if, Cox7a2l, Vdac3, Tomm22, Sugct	0.0448808	0.321429	Annotated (or known) complexes complexes with new protein subunits
167	Q9Z1P6 Q9DCJ5 Q91VD9 P99028 Q9CYH2 Q9CR62 Q9CQT9 Q9CQQ7 Q9CPQ8 Q99JR1 Q91V61 Q8VEM8 P63030 Q9CQZ5 Q9CQJ8 Q9CQC7 Q9DCC8 Q9D8W7 Q9CPP6 Q921G7 Q8CC21 Q9DCS9 Q9DC70 Q9CQZ6 Q9CPU2 Q91YT0 Q64521 Q99LY9 Q91WC3 Q9D6J5 Q9CQ54 Q8K3J1 Q3UIU2 Q9CQH3 Q91WD5 Q61387 Q60931 Q9CPQ3 Q922Q1 Q791V5 Q78IK2 Q5U458 Q9DCT2 P41216 Q9DC69 Q8JZN5 Q62425 Q9CQV1 Q60930 Q8BW75 Q9DB41 Q9CZP5 Q8K1R3 P97478 Q9D880 P59017 P56135 …	Ndufa7, Ndufa8, Ndufs1, Uqcrh, Prxl2a, Slc25a11, Rab5if, Atp5pb, Atp5mg, Sfxn1, Sfxn3, Slc25a3, Mpc1, Ndufa6, Ndufb9, Ndufb4, Tomm20, Ociad2, Ndufa5, Etfdh, Ttc19, Ndufb10, Ndufs7, Ndufb3, Ndufb2, Ndufv1, Gpd2, Ndufs5, Acsl6, Ndufb8, Ndufc2, Ndufs8, Ndufb6, Ndufb5, Ndufs2, Cox7a2l, Vdac3, Tomm22, Mtarc2, Mtch2, Atp5mk, Dnajc11, Ndufs3, Acsl1, Ndufa9, Acad9, Ndufa4, Pam16, Vdac2, Maob, Slc25a18, B…	8.01027e-13	0.400914	Annotated (or known) complexes complexes with new protein subunits
168	Q9DB77 Q8R1I1 Q5SUC9	Uqcrc2, Uqcr10, Sco1	0.0015945	0.433333	Annotated (or known) complexes complexes with new protein subunits
169	Q8BKZ9 Q99JY0 Q9DCZ4 P51660 Q8BIP0 Q8QZT1 O88696 O08749 O89106	Pdhx, Hadhb, Apoo, Hsd17b4, Dars2, Acat1, Clpp, Dld, Fhit	0.0517959	0.288791	Novel complexes
170	Q9WTP7 Q9D1I5 Q9DCM2 Q9JHW2 Q9D1R1 P56380	Ak3, Mcee, Gstk1, Nit2, Tmem126b, Nudt2	0.0402949	0.333333	Annotated (or known) complexes complexes with new protein subunits
171	Q8R1I1 Q9CPP6 Q9D2R6	Uqcr10, Ndufa5, Coa3	0.0235032	0.353741	Annotated (or known) complexes complexes with new protein subunits
172	Q9WU79 Q9DCS3 Q9CQE1 Q99KR7 Q922G0	Prodh, Mecr, Nipsnap3b, Ppif, Slc25a36	0.0696099	0.183333	Novel complexes
173	Q91WD5 Q9CPX8 Q8JZN5 Q9CZP5 P03930 Q9D880 Q9D7B6 O35129	Ndufs2, Uqcr11, Acad9, Bcs1l, Mtatp8, Timm50, Acad8, Phb2	0.00111327	0.339674	Annotated (or known) complexes complexes with new protein subunits
174	Q8BGT5 Q922E6 P31786	Gpt2, Fastkd2, Dbi	0.00215546	0.416667	Annotated (or known) complexes complexes with new protein subunits
175	Q9CYH2 Q9CR62 Q9CQT9 Q61387 Q9CPQ3 Q7TNE1 Q5U458 Q60930	Prxl2a, Slc25a11, Rab5if, Cox7a2l, Tomm22, Sugct, Dnajc11, Vdac2	0.00527211	0.267857	Annotated (or known) complexes complexes with new protein subunits
176	Q9D799 Q9D1I5 Q9DCM2 Q9JHW2	Mtfmt, Mcee, Gstk1, Nit2	0.0988093	0.160714	Novel complexes
177	P63030 Q3TBW2 Q99LB7	Mpc1, Mrpl10, Sardh	0.0235032	0.416667	Annotated (or known) complexes complexes with new protein subunits
178	Q8VCH0 Q8R0F8 Q8BH95 Q9ERI6 Q9D1R1 Q8C460 Q3TIU4	Acaa1b, Fahd1, Echs1, Rdh14, Tmem126b, Eri3, Pde12	0.0448808	0.321429	Annotated (or known) complexes complexes with new protein subunits
179	Q9CZU6 Q80Y14 P51660	Cs, Glrx5, Hsd17b4	0.0563952	0.238095	Novel complexes
180	Q9CQA3 Q9CYH2 Q9CPQ8 Q99JR1 Q8BH59 P63030 P50544 Q8CC21 Q3UV70 Q9Z2I0 Q9WV98 Q99LY9 Q9D051 Q922Q4 Q8CGK3 Q62425 Q60597 Q4VAE3 Q91WK5 Q8CBY0 Q9Z1J3 Q8K1R3 P97478 Q99N92 Q8R0Y6 Q8K1Z0 Q80V03 Q3TBW2 Q8VCX5 Q8C5H8 Q8C167 P36552 D3Z7P3 O70337 A2APY7	Sdhb, Prxl2a, Atp5mg, Sfxn1, Slc25a12, Mpc1, Acadvl, Ttc19, Pdp1, Letm1, Timm9, Ndufs5, Pdhb, Pycr2, Lonp1, Ndufa4, Ogdh, Tmem65, Gcsh, Gatc, Nfs1, Pnpt1, Coq7, Mrpl27, Aldh1l1, Coq9, Adck5, Mrpl10, Micu1, Nadk2, Prepl, Cpox, Gls, Bik, Ndufaf5	0.000701175	0.280302	Annotated (or known) complexes complexes with new protein subunits
181	Q8VCH0 Q9CYG7 Q9D8Z2 Q9EQ20 Q8R3Q6 Q9CQ92 Q9JIY5 Q6P8J7 Q9D6K8 Q921H9	Acaa1b, Tomm34, Triap1, Aldh6a1, Mix23, Fis1, Htra2, Ckmt2, Fundc2, Coa7	0.0550643	0.3	Novel complexes
182	Q9CYH2 Q9CQQ7 Q8VEM8 P50544 Q9CPP6 Q8CC21 Q9Z2I0 Q99LY9 Q91WS0 Q91WD5 Q8K2B3 Q9DCZ4 P51881 Q9D9V3 Q8JZN5 Q62425 P56382 Q8BW75 Q64133 Q8R086 Q3UHB1 Q9CZP5 Q8K1R3 P97478 P03930 Q80V03 P56135 Q80SW1 P28661 P05132 O88741 O35465 D3Z7P3	Prxl2a, Atp5pb, Slc25a3, Acadvl, Ndufa5, Ttc19, Letm1, Ndufs5, Cisd1, Ndufs2, Sdha, Apoo, Slc25a5, Echdc1, Acad9, Ndufa4, Atp5f1e, Maob, Maoa, Suox, Nt5dc3, Bcs1l, Pnpt1, Coq7, Mtatp8, Adck5, Atp5mf, Ahcyl1, Septin4, Prkaca, Gdap1, Fkbp8, Gls	0.000310148	0.295021	Annotated (or known) complexes complexes with new protein subunits
183	Q9DBL1 Q99MN9 P45952	Acadsb, Pccb, Acadm	0.996493	0.17134	Novel complexes
184	Q8R3K3 Q9D6Y7 Q8BWT1 Q8BGT5	Ptcd2, Msra, Acaa2, Gpt2	0.996493	0	Novel complexes
185	Q8BKZ9 Q9DCZ4 Q8VDK1 Q80XN0 Q571F8 Q8BIP0	Pdhx, Apoo, Nit1, Bdh1, Gls2, Dars2	0.0511374	0.25	Novel complexes
186	Q9CQC7 P08228	Ndufb4, Sod1	0.0893167	0.504405	Annotated (or known) complexes
187	P38647 Q8K3J1 Q9DCT2 Q9CPX8 Q8JZN5 Q8BW75 Q3UHB1 Q9CZP5 P03930 Q9D880 Q9D7B6 Q80SW1 O35129 P47738	Hspa9, Ndufs8, Ndufs3, Uqcr11, Acad9, Maob, Nt5dc3, Bcs1l, Mtatp8, Timm50, Acad8, Ahcyl1, Phb2, Aldh2	0.035911	0.265419	Annotated (or known) complexes complexes with new protein subunits
188	Q922E6 Q91V92	Fastkd2, Acly	0.0603842	0.291667	Novel complexes
189	Q8R1I1 P99028 Q9D0S9 Q9DCS9 Q9CPU2 P42125 O09111	Uqcr10, Uqcrh, Hint2, Ndufb10, Ndufb2, Eci1, Ndufb11	2.93498e-05	0.408163	Annotated (or known) complexes complexes with new protein subunits
