# Supplementary material for: Co-fractionation–mass spectrometry to characterize native mitochondrial protein assemblies in mammalian neurons and brain
Source: Springer Nature journal article supplement (doi:10.1038/s41596-023-00901-z), 2023-11-20
Supplement: MOESM4 [file 41596_2023_901_MOESM4_ESM23.xlsx]

## Sheet: README
Supplementary Table 1 | High-quality mt protein interactions predicted in mouse brain
Column header	Remarks
Uniprot ID for mitochondrial interactor A	Uniprot ID for mt interactor A
Uniprot ID for mitochondrial interactor B	Uniprot ID for mt interactor B
Protein name for mitocondrial interactor A	Protein name for mt interactor A
Protein name for mitochondrial interactor B	Gene name for mt interactor B
PPI score from ensemble classifier	Ensemble of supervised machine learning classifiers (Random Forest, Generalized Linear Model, Support Vector Machine) that generates a probability score for each predicted mtPPIs.
Mitochondrial or submitochondrial localization	Localization information is obtained mouse MitoCarta. IMM, inner mitochondrial membrane; OMM, outer mitochondrial membrane; IMS, intermembrane space; Unknown or Membrane, localized to mitochondria but the subcellular mitochondrial compartment is undefined.
Supplementary Table 2 | Mt protein complexes derived from protein interactions in mouse brain
Column header	Remarks
Mitochondrial complex identifier	Mitochondrial complexes identified through two-stage (ClusterONE, MCL) clustering of high-confidence mitochondrial protein-protein interaction network.
Co-complex mitochondrial membership represented with unique UniProt identifier	List of all mitochondrial proteins associated with a predicted complex.
Adjusted P-value for hypergeometric test	P-value adjusted using the Benjamini-Hochberg correction procedure.
Average matching index	Overlap with respect to size of both annotated and predicted complexes.
Mitochondrial complex status	Annotated with new subunits' refers to predicted mt complex overlapping with known complex (i.e., from CORUM, Gene Ontology cellular component, and Reactome) but with some new mitochondrial subunit members; 'Novel' refers to mitochondrial complex not previously reported; and 'Annotated' refers to predicted mitochondrial complex with near matching to known complex subunits.
Supplementary Table 3 | Mt subunits of putative protein complexes enriched for GO annotations, human disorders, and phenotypic aberrations in human disease
Column header	Remarks
Mitochondrial complex identifier	Mitochondrial complexes identified through two-stage (ClusterONE, MCL) clustering of high-confidence mitochondrial protein-protein interaction network.
GO/Human disorders/Phenotypic abnormalities in human disease	Enrichment of mitochondrial complex subunits for Gene Ontology terms, human disorders, and phenotypic anomalies found in human disease.
Data source	Gene Ontology (GO) annotations from biological process (BP), cellular component (CC) and molecular function (MF); Phenotypic abnormalities found in human disease from human phenotype ontology (HPO); and Gene-disease associations from Disease Gene Network (DisGeNET) genetic disorder database.
Adjusted P-value for hypergeometric test	P-value adjusted using the Benjamini-Hochberg correction procedure.
Enrichment	Mitochondrial subunits of the predicted complexes enriched for GO annotations, human disorders, and phenotypic aberrations in human disease.

## Sheet: Supplementary Data 3
Supplementary Data 3 | Mt subunits of putative protein complexes enriched for GO annotations, human disorders, and phenotypic aberrations in human disease
Mitochondrial complex identifier	GO/Human disorders/Phenotypic abnormalities in human disease	Data source	Adjusted P-value for hypergeometric test	Enrichment
1	Mood swings	DisGeNET	4.91694e-06	Bcs1l,Cox10,Cox15,Sardh,Echs1,Maoa,Ndufa2,Ndufa4,Ndufa9,Ndufa10,Ndufs1,Ndufs2,Ndufs3,Ndufv1,Ndufs4,Ndufs8,Ndufv2,Pdha1,Polg,Prkaca,Sdha,Sod1,Surf1,Taco1,Lipt1,Mtpap,Foxred1,Ndufa12,Ndufaf5,Pank2,Ndufaf2,Mtfmt,Ndufaf6,Nags,Ndufs7,Chchd10,Pet100
1	Hypertrichosis	DisGeNET	9.44489e-06	Acaca,Bcs1l,Cox10,Cox15,Cpox,Echs1,Ndufa2,Ndufa4,Ndufa9,Ndufa10,Ndufb8,Ndufs1,Ndufs2,Ndufs3,Ndufv1,Ndufs4,Ndufs8,Ndufv2,Pdha1,Sdha,Surf1,Sco2,Ndufaf3,Slc25a24,Taco1,Lipt1,Foxred1,Ndufa12,Ndufaf5,Ndufaf2,Sfxn1,Mtfmt,Ndufaf6,Ndufs7,Pet100
1	Progressive cerebellar ataxia	DisGeNET	5.11653e-05	Auh,Cox15,Echs1,Fxn,Gls,Ndufa2,Ndufa4,Ndufa9,Ndufa10,Ndufs1,Ndufs2,Ndufs3,Ndufv1,Ndufs4,Ndufs8,Ndufv2,Pdha1,Polg,Sdha,Surf1,Aifm1,Slc25a15,Pitrm1,Afg3l2,Pmpca,Coq2,Taco1,Lipt1,Mtpap,Dars2,Foxred1,Ndufa12,Ndufaf5,Ndufaf2,Mgme1,Mars2,Mtfmt,Ndufaf6,Ndufs7,Chchd10,Pet100
1	Severe intellectual disability	DisGeNET	7.29211e-05	Acat1,Aco2,Bcs1l,Cox15,Dbt,Dmpk,Echs1,Hmgcl,Letm1,Maoa,ATP6,Ndufa2,Ndufa4,Ndufa9,Ndufa10,Ndufs1,Ndufs2,Ndufs3,Ndufv1,Ndufs4,Ndufs8,Ndufv2,Pdha1,Phyh,Pycr1,Sdha,Surf1,Aldh5a1,Suclg1,Snap29,Wars2,Uqcrq,Pycr2,Taco1,Lipt1,Nsun2,Tmem70,Foxred1,Ndufa12,Ndufaf5,L2hgdh,Ndufaf2,Timm50,Mtfmt,Ndufaf6,Iba57,Ndufs7,Pet100
1	Blepharoptosis	DisGeNET	0.000477726	Slc25a4,Bcs1l,C1qbp,Comt,Cox6b1,Cox8a,Cox10,Cox15,Dguok,Dlat,Dna2,Echs1,Gfer,Letm1,Maoa,Mpv17,COX1,COX2,COX3,ND1,ND2,ND3,ND4,ND5,ND6,Ndufa1,Ndufa2,Ndufa4,Ndufa6,Ndufa9,Ndufa10,Ndufb3,Ndufb9,Ndufb10,Ndufs1,Ndufs2,Ndufs3,Ndufv1,Ndufs4,Ndufs8,Ndufv2,Opa1,Pdha1,Phyh,Polg,Sco1,Sdha,Sdhd,Spr,Surf1,Tk2,Top3a,Pex11b,Sucla2,Lonp1,Prepl,Sco2,Dnm1l,Micu1,Slc30a9,Fars2,Afg3l2,Polg2,Fastkd2,Ndufaf3,Pars2,Coq2…
1	Ptosis	DisGeNET	0.000477726	Slc25a4,Bcl2,Bcs1l,C1qbp,Comt,Cox6b1,Cox8a,Cox10,Cox15,Dguok,Dlat,Dna2,Echs1,Gfer,Letm1,Maoa,COX1,COX2,COX3,ND1,ND2,ND3,ND4,ND5,ND6,Ndufa1,Ndufa2,Ndufa4,Ndufa6,Ndufa9,Ndufa10,Ndufb3,Ndufb9,Ndufb10,Ndufs1,Ndufs2,Ndufs3,Ndufv1,Ndufs4,Ndufs8,Ndufv2,Opa1,Pdha1,Phyh,Polg,Sco1,Sdha,Sdhd,Spr,Surf1,Tk2,Top3a,Pex11b,Sucla2,Lonp1,Prepl,Sco2,Dnm1l,Micu1,Slc30a9,Fars2,Afg3l2,Polg2,Fastkd2,Ndufaf3,Pars2,Coq2,…
1	Leigh Syndrome Due To Mitochondrial Complex II Deficiency	DisGeNET	0.000662914	Bcs1l,Cox10,Cox15,Ndufa1,Ndufa2,Ndufa9,Ndufa10,Ndufs1,Ndufs3,Ndufv1,Ndufs4,Ndufs8,Ndufv2,Pdha1,Sdha,Surf1,Suclg1,Sucla2,Sco2,Lrpprc,Fars2,Ethe1,Uqcrq,Taco1,Ttc19,Ptcd3,Foxred1,Iars2,Ndufa12,Nars2,Gfm2,Gfm1,Ndufs7,Pet100,Pet117
1	Leigh Syndrome due to Mitochondrial Complex III Deficiency	DisGeNET	0.000662914	Bcs1l,Cox10,Cox15,Ndufa1,Ndufa2,Ndufa9,Ndufa10,Ndufs1,Ndufs3,Ndufv1,Ndufs4,Ndufs8,Ndufv2,Pdha1,Sdha,Surf1,Suclg1,Sucla2,Sco2,Lrpprc,Fars2,Ethe1,Uqcrq,Taco1,Ttc19,Ptcd3,Foxred1,Iars2,Ndufa12,Nars2,Gfm2,Gfm1,Ndufs7,Pet100,Pet117
1	Leigh Syndrome due to Mitochondrial Complex IV Deficiency	DisGeNET	0.000662914	Bcs1l,Cox10,Cox15,Ndufa1,Ndufa2,Ndufa9,Ndufa10,Ndufs1,Ndufs3,Ndufv1,Ndufs4,Ndufs8,Ndufv2,Pdha1,Sdha,Surf1,Suclg1,Sucla2,Sco2,Lrpprc,Fars2,Ethe1,Uqcrq,Taco1,Ttc19,Ptcd3,Foxred1,Iars2,Ndufa12,Nars2,Gfm2,Gfm1,Ndufs7,Pet100,Pet117
1	Leigh Syndrome due to Mitochondrial Complex V Deficiency	DisGeNET	0.000662914	Bcs1l,Cox10,Cox15,Ndufa1,Ndufa2,Ndufa9,Ndufa10,Ndufs1,Ndufs3,Ndufv1,Ndufs4,Ndufs8,Ndufv2,Pdha1,Sdha,Surf1,Suclg1,Sucla2,Sco2,Lrpprc,Fars2,Ethe1,Uqcrq,Taco1,Ttc19,Ptcd3,Foxred1,Iars2,Ndufa12,Nars2,Gfm2,Gfm1,Ndufs7,Pet100,Pet117
1	Necrotizing encephalopathy, infantile subacute, of Leigh	DisGeNET	0.000662914	Bcs1l,Cox10,Cox15,Ndufa1,Ndufa2,Ndufa9,Ndufa10,Ndufs1,Ndufs3,Ndufv1,Ndufs4,Ndufs8,Ndufv2,Pdha1,Sdha,Surf1,Suclg1,Sucla2,Sco2,Lrpprc,Fars2,Ethe1,Uqcrq,Taco1,Ttc19,Ptcd3,Foxred1,Iars2,Ndufa12,Nars2,Gfm2,Gfm1,Ndufs7,Pet100,Pet117
1	Abnormal mitochondria in muscle tissue	DisGeNET	0.000674415	ND1,ND2,ND3,Ndufa1,Ndufa6,Ndufb3,Ndufb9,Ndufb10,Ndufs1,Ndufs2,Ndufs3,Ndufv1,Ndufs4,Ndufs8,Ndufv2,Sdha,Sdhd,Afg3l2,Ndufaf3,Ndufaf4,Ndufaf1,Timmdc1,Ndufb11,Foxred1,Tmem126b,Ndufaf5,Nubpl,Ndufaf2,Ndufs7,Sdhaf1
1	Global developmental delay	DisGeNET	0.00188165	Abat,Abcb7,Acadm,Acads,Acadsb,Aco2,Abcd1,Nudt2,Aldh7a1,Auh,Bcs1l,Slc25a20,Cat,Comt,Cox6b1,Cox7b,Cox8a,Cox10,Cox15,Cps1,Cyp27a1,Dlat,Dld,Sardh,Dna2,Echs1,Fh1,Gatm,Gcdh,Gfer,Gykl1,Gls,Glud1,Got2,Gpd2,Hsd17b10,Hadha,Hadhb,Hccs,Hsd17b4,Hspd1,Idh2,Ivd,Letm1,Maoa,Maob,Mdh2,Mipep,Aldh6a1,Mpv17,ATP6,COX2,ND1,ND2,ND3,Ndufa1,Ndufa2,Ndufa4,Ndufa6,Ndufa9,Ndufa10,Ndufb3,Ndufb8,Ndufb9,Ndufb10,Ndufs1,Ndufs2,Ndu…
1	LEIGH SYNDROME DUE TO MITOCHONDRIAL COMPLEX I DEFICIENCY	DisGeNET	0.00200855	Bcs1l,Cox10,Cox15,ND2,ND5,ND6,Ndufa1,Ndufa2,Ndufa9,Ndufa10,Ndufs1,Ndufs3,Ndufv1,Ndufs4,Ndufs8,Ndufv2,Pdha1,Sdha,Surf1,Suclg1,Sucla2,Sco2,Lrpprc,Fars2,Ethe1,Uqcrq,Taco1,Ttc19,Ptcd3,Foxred1,Iars2,Ndufa12,Nars2,Gfm2,Gfm1,Ndufaf6,Ndufs7,Pet100,Pet117
1	Strabismus	DisGeNET	0.00201618	Abcb7,Aco2,Slc25a4,Aldh7a1,Bcs1l,Comt,Cox10,Cox15,Dguok,Dhodh,Sardh,Dmpk,Echs1,Gykl1,Hsd17b4,Hspd1,Letm1,Mdh2,ND1,ND2,ND3,Ndufa1,Ndufa2,Ndufa4,Ndufa6,Ndufa9,Ndufa10,Ndufb3,Ndufb9,Ndufb10,Ndufs1,Ndufs2,Ndufs3,Ndufv1,Ndufs4,Ndufs8,Ndufv2,Opa1,Pdha1,Pycr1,Aldh18a1,Sdha,Surf1,Aldh5a1,Pex11b,Sucla2,Lonp1,Recql4,Dnm1l,Lrpprc,Fars2,Yme1l1,Dhx30,Ndufaf3,Hibch,Ndufaf4,Slc25a24,Yars2,Ndufaf1,Taco1,Glrx5,Ti…
1	Leukodystrophy	DisGeNET	0.00479762	Abat,Abcd1,Cox10,Cox15,Cps1,Sardh,Echs1,Hsd17b4,Hspa9,Hspd1,Mpv17,ND1,ND2,ND3,Ndufa1,Ndufa2,Ndufa4,Ndufa6,Ndufa9,Ndufa10,Ndufb3,Ndufb8,Ndufb9,Ndufb10,Ndufs1,Ndufs2,Ndufs3,Ndufv1,Ndufs4,Ndufs8,Ndufv2,Pcx,Pdha1,Sdha,Sdhb,Surf1,Tufm,Aifm1,Sco2,Abcb6,Prdx5,Ndufaf3,Fbxl4,Nfu1,Ndufaf4,Pycr2,Ndufaf1,Taco1,Glrx5,Timmdc1,Lipt1,Ndufb11,Rmnd1,Dars2,Foxred1,Tmem126b,Ndufa12,Aars2,Ndufaf5,Nubpl,Isca1,Pnpt1,Nd…
1	Fetal Distress	DisGeNET	0.00492923	Aldh7a1,ND1,ND2,ND3,Ndufa1,Ndufa6,Ndufb3,Ndufb9,Ndufb10,Ndufs1,Ndufs2,Ndufs3,Ndufv1,Ndufs4,Ndufs8,Ndufv2,Ndufaf3,Ndufaf4,Ndufaf1,Timmdc1,Ndufb11,Foxred1,Tmem126b,Ndufaf5,Nubpl,Ndufaf2,Ndufs7
1	MITOCHONDRIAL COMPLEX I DEFICIENCY	DisGeNET	0.00593399	Slc25a10,ND1,ND2,ND3,ND4,Ndufa1,Ndufa6,Ndufb3,Ndufb8,Ndufb9,Ndufb10,Ndufs1,Ndufs2,Ndufs3,Ndufv1,Ndufs4,Ndufs8,Ndufv2,Aifm1,Sirt3,Ndufaf3,Ndufaf4,Ndufaf1,Timmdc1,Gdap1,Ndufb11,Foxred1,Tmem126b,Elac2,Ndufaf5,Nubpl,Ndufaf2,Ndufaf6,Ndufs7
1	Nicotinamide adenine dinucleotide coenzyme Q reductase deficiency	DisGeNET	0.00593399	Slc25a10,ND1,ND3,ND5,ND6,Ndufa1,Ndufa2,Ndufa9,Ndufa10,Ndufb3,Ndufb6,Ndufb8,Ndufb9,Ndufb10,Ndufs1,Ndufs2,Ndufs3,Ndufv1,Ndufs4,Ndufs8,Ndufv2,Polg,Sod2,Slc25a27,Pdss1,Mto1,Ndufaf3,Acad9,Ndufaf4,Ndufaf1,Ndufb11,Foxred1,Tmem126b,Ndufa12,Rars2,Elac2,Nubpl,Ndufaf2,Ndufaf6,Ndufs7
1	Retinitis Pigmentosa	DisGeNET	0.00707578	Aldh3a2,Arl2,Aldh7a1,Bcl2,Bcs1l,C1qbp,Cox6b1,Cox7b,Cox8a,Cox10,Cox15,Echs1,Fasn,Gykl1,Hadha,Hadhb,Hadh,Hccs,Idh2,Idh3a,Idh3b,ATP6,CYTB,ND1,ND2,ND3,ND4,ND5,ND6,Ndufa2,Ndufa4,Ndufa9,Ndufa10,Ndufs1,Ndufs2,Ndufs3,Ndufv1,Ndufs4,Ndufs8,Ndufv2,Otc,Pdha1,Phyh,Polg,Aldh18a1,Sco1,Sdha,Sdhb,Sdhd,Sod1,Surf1,Tst,Aifm1,Snap29,Fastkd2,Amacr,Poldip2,Trnt1,Taco1,Lipt1,Cycs,Ndufb11,Foxred1,Ndufa12,Ndufaf5,Pank2,Co…
1	Hypertrophic Cardiomyopathy	DisGeNET	0.00731987	Acaca,Acadl,Acadvl,Slc25a4,Bcl2,Bcs1l,Casp3,Cox6b1,Cox7b,Cox8a,Cox10,Cox15,Cpt1a,Cyp11b1,Dld,Sardh,Dmpk,Echs1,Fasn,Fxn,Hsd17b10,Hadha,Hadh,Hccs,Hspd1,Idh2,Mipep,ATP6,COX1,COX2,COX3,CYTB,ND1,ND2,ND3,ND4,ND5,ND6,Ndufa1,Ndufa2,Ndufa4,Ndufa6,Ndufa9,Ndufa10,Ndufb3,Ndufb8,Ndufb9,Ndufb10,Ndufs1,Ndufs2,Ndufs3,Ndufv1,Ndufs4,Ndufs8,Ndufv2,Opa1,Pdha1,Slc25a3,Sco1,Sdha,Sdhb,Sdhd,Star,Surf1,Suclg1,Sco2,Htatip…
1	Leigh Disease	DisGeNET	0.00933634	Bcs1l,Cox4i1,Cox8a,Cox10,Cox15,Cpox,Crat,Dld,Echs1,Fxn,ATP6,COX1,COX3,CYTB,ND1,ND2,ND3,ND4,ND5,ND6,Ndufa1,Ndufa2,Ndufa5,Ndufa9,Ndufa10,Ndufs1,Ndufs2,Ndufs3,Ndufv1,Ndufs4,Ndufs8,Ndufv2,Ogdh,Pdha1,Pdhb,Polg,Sdha,Sdhb,Sod2,Surf1,Txnrd1,Pdhx,Suclg1,Sucla2,Cox5a,Sco2,Tsfm,Lrpprc,Fars2,Lias,Ethe1,Mto1,Ndufaf3,Hibch,Uqcrq,Ndufaf4,Coq4,Taco1,Timmdc1,Lipt1,Pdp1,Ttc19,Ptcd3,Parl,Foxred1,Trmu,Iars2,Ndufa12,…
1	Nystagmus	DisGeNET	0.0117412	Abcb7,Aco2,Slc25a4,Bcs1l,Slc25a20,Cox8a,Cox10,Cox15,Dguok,Dlat,Echs1,Fdxr,Fxn,Hsd17b10,Hsd17b4,Hspd1,Idh3a,Idh3b,Letm1,Mpv17,ATP6,ND1,ND2,ND3,ND4,ND5,ND6,Ndufa1,Ndufa2,Ndufa4,Ndufa6,Ndufa9,Ndufa10,Ndufb3,Ndufb8,Ndufb9,Ndufb10,Ndufs1,Ndufs2,Ndufs3,Ndufv1,Ndufs4,Ndufs8,Ndufv2,Opa1,Pdha1,Phyh,Polg,Sdha,Sdhb,Sdhd,Spg7,Surf1,Tufm,Pex11b,Lonp1,Recql4,Sco2,Dnm1l,Wars2,Afg3l2,Rpia,Pmpca,Prdx5,Ndufaf3,Par…
1	Dysarthria	DisGeNET	0.0117412	Abcb7,Aldh3a2,Slc25a4,Auh,Bcs1l,Cox10,Cox15,Timm8a1,Echs1,Fxn,Hsd17b10,Hmgcl,ATP6,COX1,COX2,COX3,ND1,ND4,ND5,ND6,Ndufa2,Ndufa4,Ndufa9,Ndufa10,Ndufs1,Ndufs2,Ndufs3,Ndufv1,Ndufs4,Ndufs8,Ndufv2,Pdha1,Polg,Aldh18a1,Sdha,Spg7,Spr,Surf1,Tk2,Top3a,Tmem11,Sco2,Dnm1l,Fars2,Afg3l2,Polg2,Rpia,Pmpca,Amacr,Pnkd,Coq2,Pnpla8,Mecr,Taco1,Glrx5,Lipt1,Nsun2,Ttc19,Mtpap,Dars2,Vps13d,Foxred1,Ndufa12,Aars2,Coa7,Ndufaf…
1	Optic Atrophy	DisGeNET	0.0136495	Aco2,Agxt,Auh,Bcl2,Bcs1l,Comt,Cox6b1,Cox8a,Cox10,Cox15,Decr1,Timm8a1,Dguok,Sardh,Dmpk,Echs1,Fdxr,Fh1,Fxn,Hsd17b10,Idh3a,Idh3b,Letm1,Mipep,ATP6,COX1,COX2,COX3,CYTB,ND1,ND2,ND3,ND4,ND4L,ND5,ND6,Ndufa2,Ndufa4,Ndufa9,Ndufa10,Ndufb8,Ndufs1,Ndufs2,Ndufs3,Ndufv1,Ndufs4,Ndufs8,Ndufv2,Oat,Opa1,Pdha1,Polg,Sco1,Sdha,Sdhd,Spg7,Ssbp1,Surf1,Tk2,Txnrd1,Pdhx,Pex11b,Snap29,Recql4,Mfn2,Sco2,Dnm1l,Tsfm,Wars2,Micu1,…
1	Parkinson Disease	DisGeNET	0.0232287	Acaca,Aco2,Aldh2,Apex1,Bax,Bcl2,Bcl2l1,Tspo,Casp3,Casp8,Casp9,Cat,Comt,Cox8a,Cox10,Cpox,Crat,Cry1,Cryz,Cyc1,Cyp27b1,Dbi,Decr1,Timm8a1,Dld,Dmpk,Ehhadh,Endog,Ephx2,Fasn,Fdxr,Fxn,Fth1,Gls,Glud1,Gpx1,Gsr,Hsd17b10,Hspa9,Hspd1,Maoa,Maob,Mcl1,Msra,COX2,CYTB,ND1,ND2,ND3,ND5,Mtx1,Ndufa1,Ndufa2,Ndufs3,Ndufs4,Ndufv2,Ogdh,Ogg1,Opa1,Pdha1,Phb,Slc25a3,Polb,Polg,Prkaca,Qdpr,Shmt2,Sod1,Sod2,Spg7,Spr,Prdx2,Tfam,T…
1	Failure to Thrive	DisGeNET	0.0234317	Acads,Aco2,Agxt,Ak2,Abcd1,Slc25a4,Auh,Bcs1l,Casp8,Comt,Cox6b1,Cox7b,Cox8a,Cox10,Cox15,Cps1,Cyp11a1,Cyp11b1,Cyp24a1,Cyp27b1,Dguok,Dld,Echs1,Fh1,Gatm,Gcdh,Got2,Hadha,Hadhb,Hadh,Hccs,Hsd17b4,Letm1,Mdh2,Mipep,Mpv17,ATP6,ND1,ND2,ND3,ND4,ND5,ND6,Ndufa1,Ndufa2,Ndufa4,Ndufa6,Ndufa9,Ndufa10,Ndufb3,Ndufb8,Ndufb9,Ndufb10,Ndufs1,Ndufs2,Ndufs3,Ndufv1,Ndufs4,Ndufs8,Ndufv2,Otc,Pcca,Pccb,Pdha1,Slc25a3,Polg,Pycr1…
1	Oppositional Defiant Disorder	DisGeNET	0.0235406	Comt,Maoa,Maob
1	Paranoid Schizophrenia	DisGeNET	0.0235406	Comt,Maoa,Maob
1	Anemia	DisGeNET	0.0292657	Abcb7,Agxt,Ak2,Alas2,Slc25a5,Bcl2,Car5a,Casp3,Cat,Cox6b1,Cox8a,Cox10,Cox15,Dbi,Decr1,Echs1,Fabp1,Fech,Fhit,Gpx1,Gsr,Hmgcl,Idh2,Maob,CYTB,Mtx1,Ndufa2,Ndufa4,Ndufa9,Ndufa10,Ndufb8,Ndufs1,Ndufs2,Ndufs3,Ndufv1,Ndufs4,Ndufs8,Ndufv2,Pcca,Pccb,Pdha1,Polg,Ppox,Acsm3,Sco1,Sdha,Sdhb,Sdhc,Shmt2,Sod1,Sod2,Spg7,Surf1,Uqcrfs1,Recql4,Mfn2,Sco2,Bcl2l11,Aass,Slc25a13,Txnrd2,Fastkd2,Ndufaf3,Acad8,Bbc3,Coq2,Ak3,Yar…
1	Hypoglycemia	DisGeNET	0.0323354	Acadl,Acadm,Acadsb,Acadvl,Acat1,Auh,Bckdha,Bckdhb,Bcs1l,Bid,Car5a,Slc25a20,Cpt1a,Cpt2,Dbt,Timm8a1,Dguok,Dld,Etfa,Etfb,Etfdh,Gcdh,Gykl1,Glud1,Gsr,Hsd17b10,Hadha,Hadh,Hmgcl,Hmgcs2,Mpv17,ND1,ND2,ND3,Ndufa1,Ndufa6,Ndufb3,Ndufb9,Ndufb10,Ndufs1,Ndufs2,Ndufs3,Ndufv1,Ndufs4,Ndufs8,Ndufv2,Otc,Pcx,Pcca,Pccb,Pck2,Sod2,Star,Tfam,Ucp2,Uqcrb,Uqcrc2,Suclg1,Prepl,Dnm1l,Lrpprc,Wars2,Mlycd,Mto1,Ndufaf3,Uqcrq,Gls2,…
1	Cerebral atrophy	DisGeNET	0.0348341	Aldh2,Auh,Bcs1l,Tspo,Cyp27a1,Dguok,Dmpk,Fh1,Ndufa2,Ndufa9,Ndufs1,Ndufs2,Ndufv1,Ndufv2,Pcca,Pccb,Pdha1,Polg,Tk2,Suclg1,Sucla2,Aifm1,Dnm1l,Wars2,Fars2,Yme1l1,Dhx30,Prdx5,Pars2,Fbxl4,Coq2,Htra2,Trit1,Nsun2,Ttc19,Dars2,Coq9,Rars2,Trmt5,Cars2,Nars2,Slc25a22,Clpb,Serac1,Lyrm7,Timm50,Mars2,Nadk2,Iba57
1	EAR, PATELLA, SHORT STATURE SYNDROME	DisGeNET	0.0420228	Comt,Fasn,Maob,Sod1
1	Elastosis perforans serpiginosa	DisGeNET	0.0420228	Comt,Fasn,Maob,Sod1
1	Gambling, Pathological	DisGeNET	0.0420228	Comt,Maoa,Maob,Chpt1
1	Stress, Psychological	DisGeNET	0.0437273	Abcd2,Cat,Comt,Fasn,Maoa,Poldip2,Acad8,Mcat
1	Brain atrophy	DisGeNET	0.0447081	Aldh2,Tspo,Ndufs1,Ndufs2,Ndufv1,Ndufv2,Pcca,Polg,Yme1l1,Trmt5,Nars2,Serac1,Timm50
1	Pheochromocytoma, Extra-Adrenal	DisGeNET	0.0447081	Comt,Dlst,Sardh,Fh1,Maoa,Maob,Mdh2,Sdha,Sdhb,Sdhc,Sdhd,Slc25a11,Sdhaf2
3	Mood swings	DisGeNET	0.00646728	Bcs1l,Cox10,Cox15,Sardh,Echs1,Maoa,Ndufa2,Ndufa4,Ndufa9,Ndufa10,Ndufs1,Ndufs2,Ndufs3,Ndufv1,Ndufs4,Ndufs8,Ndufv2,Pdha1,Polg,Prkaca,Sdha,Sod1,Surf1,Taco1,Lipt1,Mtpap,Foxred1,Ndufa12,Ndufaf5,Pank2,Ndufaf2,Mtfmt,Ndufaf6,Nags,Ndufs7,Chchd10,Pet100
3	Severe intellectual disability	DisGeNET	0.00959924	Acat1,Aco2,Bcs1l,Cox15,Dbt,Dmpk,Echs1,Hmgcl,Letm1,Maoa,ATP6,Ndufa2,Ndufa4,Ndufa9,Ndufa10,Ndufs1,Ndufs2,Ndufs3,Ndufv1,Ndufs4,Ndufs8,Ndufv2,Pdha1,Phyh,Pycr1,Sdha,Surf1,Aldh5a1,Suclg1,Snap29,Wars2,Uqcrq,Pycr2,Taco1,Lipt1,Nsun2,Tmem70,Foxred1,Ndufa12,Ndufaf5,L2hgdh,Ndufaf2,Timm50,Mtfmt,Ndufaf6,Iba57,Ndufs7,Pet100
3	Blepharoptosis	DisGeNET	0.0114932	Slc25a4,Bcs1l,C1qbp,Comt,Cox6b1,Cox8a,Cox10,Cox15,Dguok,Dlat,Dna2,Echs1,Gfer,Letm1,Maoa,Mpv17,COX1,COX2,COX3,ND1,ND2,ND3,ND4,ND5,ND6,Ndufa1,Ndufa2,Ndufa4,Ndufa6,Ndufa9,Ndufa10,Ndufb3,Ndufb9,Ndufb10,Ndufs1,Ndufs2,Ndufs3,Ndufv1,Ndufs4,Ndufs8,Ndufv2,Opa1,Pdha1,Phyh,Polg,Sco1,Sdha,Sdhd,Spr,Surf1,Tk2,Top3a,Pex11b,Sucla2,Lonp1,Prepl,Sco2,Dnm1l,Micu1,Slc30a9,Fars2,Afg3l2,Polg2,Fastkd2,Ndufaf3,Pars2,Coq2…
3	Ptosis	DisGeNET	0.0114932	Slc25a4,Bcl2,Bcs1l,C1qbp,Comt,Cox6b1,Cox8a,Cox10,Cox15,Dguok,Dlat,Dna2,Echs1,Gfer,Letm1,Maoa,COX1,COX2,COX3,ND1,ND2,ND3,ND4,ND5,ND6,Ndufa1,Ndufa2,Ndufa4,Ndufa6,Ndufa9,Ndufa10,Ndufb3,Ndufb9,Ndufb10,Ndufs1,Ndufs2,Ndufs3,Ndufv1,Ndufs4,Ndufs8,Ndufv2,Opa1,Pdha1,Phyh,Polg,Sco1,Sdha,Sdhd,Spr,Surf1,Tk2,Top3a,Pex11b,Sucla2,Lonp1,Prepl,Sco2,Dnm1l,Micu1,Slc30a9,Fars2,Afg3l2,Polg2,Fastkd2,Ndufaf3,Pars2,Coq2,…
3	Hypertrichosis	DisGeNET	0.012777	Acaca,Bcs1l,Cox10,Cox15,Cpox,Echs1,Ndufa2,Ndufa4,Ndufa9,Ndufa10,Ndufb8,Ndufs1,Ndufs2,Ndufs3,Ndufv1,Ndufs4,Ndufs8,Ndufv2,Pdha1,Sdha,Surf1,Sco2,Ndufaf3,Slc25a24,Taco1,Lipt1,Foxred1,Ndufa12,Ndufaf5,Ndufaf2,Sfxn1,Mtfmt,Ndufaf6,Ndufs7,Pet100
3	Global developmental delay	DisGeNET	0.0156381	Abat,Abcb7,Acadm,Acads,Acadsb,Aco2,Abcd1,Nudt2,Aldh7a1,Auh,Bcs1l,Slc25a20,Cat,Comt,Cox6b1,Cox7b,Cox8a,Cox10,Cox15,Cps1,Cyp27a1,Dlat,Dld,Sardh,Dna2,Echs1,Fh1,Gatm,Gcdh,Gfer,Gykl1,Gls,Glud1,Got2,Gpd2,Hsd17b10,Hadha,Hadhb,Hccs,Hsd17b4,Hspd1,Idh2,Ivd,Letm1,Maoa,Maob,Mdh2,Mipep,Aldh6a1,Mpv17,ATP6,COX2,ND1,ND2,ND3,Ndufa1,Ndufa2,Ndufa4,Ndufa6,Ndufa9,Ndufa10,Ndufb3,Ndufb8,Ndufb9,Ndufb10,Ndufs1,Ndufs2,Ndu…
3	Leigh Disease	DisGeNET	0.021652	Bcs1l,Cox4i1,Cox8a,Cox10,Cox15,Cpox,Crat,Dld,Echs1,Fxn,ATP6,COX1,COX3,CYTB,ND1,ND2,ND3,ND4,ND5,ND6,Ndufa1,Ndufa2,Ndufa5,Ndufa9,Ndufa10,Ndufs1,Ndufs2,Ndufs3,Ndufv1,Ndufs4,Ndufs8,Ndufv2,Ogdh,Pdha1,Pdhb,Polg,Sdha,Sdhb,Sod2,Surf1,Txnrd1,Pdhx,Suclg1,Sucla2,Cox5a,Sco2,Tsfm,Lrpprc,Fars2,Lias,Ethe1,Mto1,Ndufaf3,Hibch,Uqcrq,Ndufaf4,Coq4,Taco1,Timmdc1,Lipt1,Pdp1,Ttc19,Ptcd3,Parl,Foxred1,Trmu,Iars2,Ndufa12,…
3	Strabismus	DisGeNET	0.0232287	Abcb7,Aco2,Slc25a4,Aldh7a1,Bcs1l,Comt,Cox10,Cox15,Dguok,Dhodh,Sardh,Dmpk,Echs1,Gykl1,Hsd17b4,Hspd1,Letm1,Mdh2,ND1,ND2,ND3,Ndufa1,Ndufa2,Ndufa4,Ndufa6,Ndufa9,Ndufa10,Ndufb3,Ndufb9,Ndufb10,Ndufs1,Ndufs2,Ndufs3,Ndufv1,Ndufs4,Ndufs8,Ndufv2,Opa1,Pdha1,Pycr1,Aldh18a1,Sdha,Surf1,Aldh5a1,Pex11b,Sucla2,Lonp1,Recql4,Dnm1l,Lrpprc,Fars2,Yme1l1,Dhx30,Ndufaf3,Hibch,Ndufaf4,Slc25a24,Yars2,Ndufaf1,Taco1,Glrx5,Ti…
3	Progressive cerebellar ataxia	DisGeNET	0.0232287	Auh,Cox15,Echs1,Fxn,Gls,Ndufa2,Ndufa4,Ndufa9,Ndufa10,Ndufs1,Ndufs2,Ndufs3,Ndufv1,Ndufs4,Ndufs8,Ndufv2,Pdha1,Polg,Sdha,Surf1,Aifm1,Slc25a15,Pitrm1,Afg3l2,Pmpca,Coq2,Taco1,Lipt1,Mtpap,Dars2,Foxred1,Ndufa12,Ndufaf5,Ndufaf2,Mgme1,Mars2,Mtfmt,Ndufaf6,Ndufs7,Chchd10,Pet100
3	Nystagmus	DisGeNET	0.026947	Abcb7,Aco2,Slc25a4,Bcs1l,Slc25a20,Cox8a,Cox10,Cox15,Dguok,Dlat,Echs1,Fdxr,Fxn,Hsd17b10,Hsd17b4,Hspd1,Idh3a,Idh3b,Letm1,Mpv17,ATP6,ND1,ND2,ND3,ND4,ND5,ND6,Ndufa1,Ndufa2,Ndufa4,Ndufa6,Ndufa9,Ndufa10,Ndufb3,Ndufb8,Ndufb9,Ndufb10,Ndufs1,Ndufs2,Ndufs3,Ndufv1,Ndufs4,Ndufs8,Ndufv2,Opa1,Pdha1,Phyh,Polg,Sdha,Sdhb,Sdhd,Spg7,Surf1,Tufm,Pex11b,Lonp1,Recql4,Sco2,Dnm1l,Wars2,Afg3l2,Rpia,Pmpca,Prdx5,Ndufaf3,Par…
3	Abnormal mitochondria in muscle tissue	DisGeNET	0.0397025	ND1,ND2,ND3,Ndufa1,Ndufa6,Ndufb3,Ndufb9,Ndufb10,Ndufs1,Ndufs2,Ndufs3,Ndufv1,Ndufs4,Ndufs8,Ndufv2,Sdha,Sdhd,Afg3l2,Ndufaf3,Ndufaf4,Ndufaf1,Timmdc1,Ndufb11,Foxred1,Tmem126b,Ndufaf5,Nubpl,Ndufaf2,Ndufs7,Sdhaf1
3	Mixed anxiety and depressive disorder	DisGeNET	0.042724	Aldh2,Comt,Maoa,Sod1,Acad8
3	Hypertrophic Cardiomyopathy	DisGeNET	0.0446123	Acaca,Acadl,Acadvl,Slc25a4,Bcl2,Bcs1l,Casp3,Cox6b1,Cox7b,Cox8a,Cox10,Cox15,Cpt1a,Cyp11b1,Dld,Sardh,Dmpk,Echs1,Fasn,Fxn,Hsd17b10,Hadha,Hadh,Hccs,Hspd1,Idh2,Mipep,ATP6,COX1,COX2,COX3,CYTB,ND1,ND2,ND3,ND4,ND5,ND6,Ndufa1,Ndufa2,Ndufa4,Ndufa6,Ndufa9,Ndufa10,Ndufb3,Ndufb8,Ndufb9,Ndufb10,Ndufs1,Ndufs2,Ndufs3,Ndufv1,Ndufs4,Ndufs8,Ndufv2,Opa1,Pdha1,Slc25a3,Sco1,Sdha,Sdhb,Sdhd,Star,Surf1,Suclg1,Sco2,Htatip…
3	Leukodystrophy	DisGeNET	0.0456907	Abat,Abcd1,Cox10,Cox15,Cps1,Sardh,Echs1,Hsd17b4,Hspa9,Hspd1,Mpv17,ND1,ND2,ND3,Ndufa1,Ndufa2,Ndufa4,Ndufa6,Ndufa9,Ndufa10,Ndufb3,Ndufb8,Ndufb9,Ndufb10,Ndufs1,Ndufs2,Ndufs3,Ndufv1,Ndufs4,Ndufs8,Ndufv2,Pcx,Pdha1,Sdha,Sdhb,Surf1,Tufm,Aifm1,Sco2,Abcb6,Prdx5,Ndufaf3,Fbxl4,Nfu1,Ndufaf4,Pycr2,Ndufaf1,Taco1,Glrx5,Timmdc1,Lipt1,Ndufb11,Rmnd1,Dars2,Foxred1,Tmem126b,Ndufa12,Aars2,Ndufaf5,Nubpl,Isca1,Pnpt1,Nd…
3	Optic Atrophy	DisGeNET	0.0467796	Aco2,Agxt,Auh,Bcl2,Bcs1l,Comt,Cox6b1,Cox8a,Cox10,Cox15,Decr1,Timm8a1,Dguok,Sardh,Dmpk,Echs1,Fdxr,Fh1,Fxn,Hsd17b10,Idh3a,Idh3b,Letm1,Mipep,ATP6,COX1,COX2,COX3,CYTB,ND1,ND2,ND3,ND4,ND4L,ND5,ND6,Ndufa2,Ndufa4,Ndufa9,Ndufa10,Ndufb8,Ndufs1,Ndufs2,Ndufs3,Ndufv1,Ndufs4,Ndufs8,Ndufv2,Oat,Opa1,Pdha1,Polg,Sco1,Sdha,Sdhd,Spg7,Ssbp1,Surf1,Tk2,Txnrd1,Pdhx,Pex11b,Snap29,Recql4,Mfn2,Sco2,Dnm1l,Tsfm,Wars2,Micu1,…
4	MITOCHONDRIAL COMPLEX III DEFICIENCY (disorder)	DisGeNET	0.0388454	Bcs1l,Cyc1,CYTB,Uqcrb,Uqcrc2,Uqcrq,Ttc19,Uqcc2,Lyrm7
6	Acute Kidney Tubular Necrosis	DisGeNET	0.0435411	Ak4,Fabp1,Gsr,Hspa9,COX2,Oat,Sod2,Prdx3,Mlycd
6	Congenital Dysplasia Of The Hip	DisGeNET	0.0435411	Dhodh,Hspa9,Pycr1,Aldh18a1,Lonp1,Recql4,Uqcc1,Chdh,Iars2
6	Autosomal dominant retinitis pigmentosa	DisGeNET	0.0493058	Tst,Lonp1,Pmpca
6	Hypoplasia of thumb	DisGeNET	0.0493058	Dhodh,Letm1,Recql4
8	Nicotinamide adenine dinucleotide coenzyme Q reductase deficiency	DisGeNET	7.00112e-05	Slc25a10,ND1,ND3,ND5,ND6,Ndufa1,Ndufa2,Ndufa9,Ndufa10,Ndufb3,Ndufb6,Ndufb8,Ndufb9,Ndufb10,Ndufs1,Ndufs2,Ndufs3,Ndufv1,Ndufs4,Ndufs8,Ndufv2,Polg,Sod2,Slc25a27,Pdss1,Mto1,Ndufaf3,Acad9,Ndufaf4,Ndufaf1,Ndufb11,Foxred1,Tmem126b,Ndufa12,Rars2,Elac2,Nubpl,Ndufaf2,Ndufaf6,Ndufs7
8	MITOCHONDRIAL COMPLEX I DEFICIENCY	DisGeNET	0.000217856	Slc25a10,ND1,ND2,ND3,ND4,Ndufa1,Ndufa6,Ndufb3,Ndufb8,Ndufb9,Ndufb10,Ndufs1,Ndufs2,Ndufs3,Ndufv1,Ndufs4,Ndufs8,Ndufv2,Aifm1,Sirt3,Ndufaf3,Ndufaf4,Ndufaf1,Timmdc1,Gdap1,Ndufb11,Foxred1,Tmem126b,Elac2,Ndufaf5,Nubpl,Ndufaf2,Ndufaf6,Ndufs7
8	Fetal Distress	DisGeNET	0.00322592	Aldh7a1,ND1,ND2,ND3,Ndufa1,Ndufa6,Ndufb3,Ndufb9,Ndufb10,Ndufs1,Ndufs2,Ndufs3,Ndufv1,Ndufs4,Ndufs8,Ndufv2,Ndufaf3,Ndufaf4,Ndufaf1,Timmdc1,Ndufb11,Foxred1,Tmem126b,Ndufaf5,Nubpl,Ndufaf2,Ndufs7
8	Abnormal mitochondria in muscle tissue	DisGeNET	0.00493787	ND1,ND2,ND3,Ndufa1,Ndufa6,Ndufb3,Ndufb9,Ndufb10,Ndufs1,Ndufs2,Ndufs3,Ndufv1,Ndufs4,Ndufs8,Ndufv2,Sdha,Sdhd,Afg3l2,Ndufaf3,Ndufaf4,Ndufaf1,Timmdc1,Ndufb11,Foxred1,Tmem126b,Ndufaf5,Nubpl,Ndufaf2,Ndufs7,Sdhaf1
8	Hypertrophic Cardiomyopathy	DisGeNET	0.0078867	Acaca,Acadl,Acadvl,Slc25a4,Bcl2,Bcs1l,Casp3,Cox6b1,Cox7b,Cox8a,Cox10,Cox15,Cpt1a,Cyp11b1,Dld,Sardh,Dmpk,Echs1,Fasn,Fxn,Hsd17b10,Hadha,Hadh,Hccs,Hspd1,Idh2,Mipep,ATP6,COX1,COX2,COX3,CYTB,ND1,ND2,ND3,ND4,ND5,ND6,Ndufa1,Ndufa2,Ndufa4,Ndufa6,Ndufa9,Ndufa10,Ndufb3,Ndufb8,Ndufb9,Ndufb10,Ndufs1,Ndufs2,Ndufs3,Ndufv1,Ndufs4,Ndufs8,Ndufv2,Opa1,Pdha1,Slc25a3,Sco1,Sdha,Sdhb,Sdhd,Star,Surf1,Suclg1,Sco2,Htatip…
8	Leukodystrophy	DisGeNET	0.00837286	Abat,Abcd1,Cox10,Cox15,Cps1,Sardh,Echs1,Hsd17b4,Hspa9,Hspd1,Mpv17,ND1,ND2,ND3,Ndufa1,Ndufa2,Ndufa4,Ndufa6,Ndufa9,Ndufa10,Ndufb3,Ndufb8,Ndufb9,Ndufb10,Ndufs1,Ndufs2,Ndufs3,Ndufv1,Ndufs4,Ndufs8,Ndufv2,Pcx,Pdha1,Sdha,Sdhb,Surf1,Tufm,Aifm1,Sco2,Abcb6,Prdx5,Ndufaf3,Fbxl4,Nfu1,Ndufaf4,Pycr2,Ndufaf1,Taco1,Glrx5,Timmdc1,Lipt1,Ndufb11,Rmnd1,Dars2,Foxred1,Tmem126b,Ndufa12,Aars2,Ndufaf5,Nubpl,Isca1,Pnpt1,Nd…
8	Nystagmus	DisGeNET	0.0181536	Abcb7,Aco2,Slc25a4,Bcs1l,Slc25a20,Cox8a,Cox10,Cox15,Dguok,Dlat,Echs1,Fdxr,Fxn,Hsd17b10,Hsd17b4,Hspd1,Idh3a,Idh3b,Letm1,Mpv17,ATP6,ND1,ND2,ND3,ND4,ND5,ND6,Ndufa1,Ndufa2,Ndufa4,Ndufa6,Ndufa9,Ndufa10,Ndufb3,Ndufb8,Ndufb9,Ndufb10,Ndufs1,Ndufs2,Ndufs3,Ndufv1,Ndufs4,Ndufs8,Ndufv2,Opa1,Pdha1,Phyh,Polg,Sdha,Sdhb,Sdhd,Spg7,Surf1,Tufm,Pex11b,Lonp1,Recql4,Sco2,Dnm1l,Wars2,Afg3l2,Rpia,Pmpca,Prdx5,Ndufaf3,Par…
8	Blepharoptosis	DisGeNET	0.0232287	Slc25a4,Bcs1l,C1qbp,Comt,Cox6b1,Cox8a,Cox10,Cox15,Dguok,Dlat,Dna2,Echs1,Gfer,Letm1,Maoa,Mpv17,COX1,COX2,COX3,ND1,ND2,ND3,ND4,ND5,ND6,Ndufa1,Ndufa2,Ndufa4,Ndufa6,Ndufa9,Ndufa10,Ndufb3,Ndufb9,Ndufb10,Ndufs1,Ndufs2,Ndufs3,Ndufv1,Ndufs4,Ndufs8,Ndufv2,Opa1,Pdha1,Phyh,Polg,Sco1,Sdha,Sdhd,Spr,Surf1,Tk2,Top3a,Pex11b,Sucla2,Lonp1,Prepl,Sco2,Dnm1l,Micu1,Slc30a9,Fars2,Afg3l2,Polg2,Fastkd2,Ndufaf3,Pars2,Coq2…
8	Ptosis	DisGeNET	0.0232287	Slc25a4,Bcl2,Bcs1l,C1qbp,Comt,Cox6b1,Cox8a,Cox10,Cox15,Dguok,Dlat,Dna2,Echs1,Gfer,Letm1,Maoa,COX1,COX2,COX3,ND1,ND2,ND3,ND4,ND5,ND6,Ndufa1,Ndufa2,Ndufa4,Ndufa6,Ndufa9,Ndufa10,Ndufb3,Ndufb9,Ndufb10,Ndufs1,Ndufs2,Ndufs3,Ndufv1,Ndufs4,Ndufs8,Ndufv2,Opa1,Pdha1,Phyh,Polg,Sco1,Sdha,Sdhd,Spr,Surf1,Tk2,Top3a,Pex11b,Sucla2,Lonp1,Prepl,Sco2,Dnm1l,Micu1,Slc30a9,Fars2,Afg3l2,Polg2,Fastkd2,Ndufaf3,Pars2,Coq2,…
8	Hypertrichosis	DisGeNET	0.024861	Acaca,Bcs1l,Cox10,Cox15,Cpox,Echs1,Ndufa2,Ndufa4,Ndufa9,Ndufa10,Ndufb8,Ndufs1,Ndufs2,Ndufs3,Ndufv1,Ndufs4,Ndufs8,Ndufv2,Pdha1,Sdha,Surf1,Sco2,Ndufaf3,Slc25a24,Taco1,Lipt1,Foxred1,Ndufa12,Ndufaf5,Ndufaf2,Sfxn1,Mtfmt,Ndufaf6,Ndufs7,Pet100
8	Retinitis Pigmentosa	DisGeNET	0.024861	Aldh3a2,Arl2,Aldh7a1,Bcl2,Bcs1l,C1qbp,Cox6b1,Cox7b,Cox8a,Cox10,Cox15,Echs1,Fasn,Gykl1,Hadha,Hadhb,Hadh,Hccs,Idh2,Idh3a,Idh3b,ATP6,CYTB,ND1,ND2,ND3,ND4,ND5,ND6,Ndufa2,Ndufa4,Ndufa9,Ndufa10,Ndufs1,Ndufs2,Ndufs3,Ndufv1,Ndufs4,Ndufs8,Ndufv2,Otc,Pdha1,Phyh,Polg,Aldh18a1,Sco1,Sdha,Sdhb,Sdhd,Sod1,Surf1,Tst,Aifm1,Snap29,Fastkd2,Amacr,Poldip2,Trnt1,Taco1,Lipt1,Cycs,Ndufb11,Foxred1,Ndufa12,Ndufaf5,Pank2,Co…
8	Strabismus	DisGeNET	0.0289107	Abcb7,Aco2,Slc25a4,Aldh7a1,Bcs1l,Comt,Cox10,Cox15,Dguok,Dhodh,Sardh,Dmpk,Echs1,Gykl1,Hsd17b4,Hspd1,Letm1,Mdh2,ND1,ND2,ND3,Ndufa1,Ndufa2,Ndufa4,Ndufa6,Ndufa9,Ndufa10,Ndufb3,Ndufb9,Ndufb10,Ndufs1,Ndufs2,Ndufs3,Ndufv1,Ndufs4,Ndufs8,Ndufv2,Opa1,Pdha1,Pycr1,Aldh18a1,Sdha,Surf1,Aldh5a1,Pex11b,Sucla2,Lonp1,Recql4,Dnm1l,Lrpprc,Fars2,Yme1l1,Dhx30,Ndufaf3,Hibch,Ndufaf4,Slc25a24,Yars2,Ndufaf1,Taco1,Glrx5,Ti…
8	Sensorineural Hearing Loss (disorder)	DisGeNET	0.0424778	Acadvl,Ak2,Abcd1,Bcs1l,Cat,Cox6b1,Cox8a,Cox10,Cox15,Timm8a1,Dguok,Echs1,Gfer,Hsd17b10,Hsd17b4,Idh3a,Idh3b,ATP6,COX1,COX2,COX3,ND1,ND2,ND3,ND4,ND5,ND6,Ndufa1,Ndufa6,Ndufb3,Ndufb9,Ndufb10,Ndufs1,Ndufs2,Ndufs3,Ndufv1,Ndufs4,Ndufs8,Ndufv2,Ogdh,Opa1,Pdk3,Phyh,Polg,Aldh18a1,Sco1,Sdha,Sdhd,Sod2,Surf1,Tk2,Top3a,Pex11b,Sucla2,Aifm1,Snap29,Lonp1,Mfn2,Sco2,Dnm1l,Tsfm,Txnrd2,Yme1l1,Immt,Fastkd2,Lars2,Hars2,N…
10	Hypoplasia of thumb	DisGeNET	0.0259709	Dhodh,Letm1,Recql4
10	Arachnodactyly	DisGeNET	0.0380072	Comt,Letm1,Pycr2,Mrps22
10	Chloasma	DisGeNET	0.0380072	Aldh2,Arg2,Slc25a3,Sfxn1
10	Cleft upper lip	DisGeNET	0.0380072	Dhodh,Fpgs,Letm1,Slc25a21
10	Congenital small ears	DisGeNET	0.0380072	Dhodh,Hspa9,Letm1,Pam16
10	Malar flattening	DisGeNET	0.0435411	Comt,Dhodh,Pycr1,Lrpprc,Pycr2
13	Malar flattening	DisGeNET	0.0257566	Comt,Dhodh,Pycr1,Lrpprc,Pycr2
18	Bipolar Disorder	DisGeNET	0.0270096	Acaca,Acads,Aco2,Alas1,Aldh2,Slc25a4,Bcl2,Bid,Tspo,Car5a,Casp8,Cat,Comt,Cox8a,Cpox,Cry1,Ehhadh,Got2,Gstz1,Hint1,Hspd1,Hspe1,Idh2,Idh3a,Idh3b,Maoa,Maob,Me2,COX1,COX2,ND1,ND4,Ndufa6,Ndufs1,Ndufv1,Ndufv2,Ndufv3,Pcx,Pde2a,Polg,Prodh,Sdhc,Sod1,Sod2,Spr,Star,Ucp2,Kmo,Cox5a,Mrpl33,Glyat,Micu1,Fastk,Akap10,Polg2,Park7,Vwa8,Lars2,Snd1,Macrod1,Mrps33,Chdh,Smim8,Flad1,Slc25a26,Ppm1k,Prss35
18	Follicular thyroid carcinoma	DisGeNET	0.0354362	Acaca,Bnip3,Cyp24a1,Cyp27b1,Fhit,Got2,Hspa9,Idh2,Nthl1,Ogg1,Phb,Sdhb,Sdhc,Sdhd,Sod2,Mrpl28,Txnrd2
18	Impaired cognition	DisGeNET	0.0388454	Acat1,Aldh2,Slc25a4,Aldh7a1,Auh,Bcl2,Casp3,Casp9,Cat,Comt,Cox8a,Cyc1,Cyp27a1,Decr1,Dguok,Dlst,Fdps,Fxn,Gcdh,Gls,Got2,Gpx1,Hint1,Maoa,Maob,COX1,COX2,ND5,Mutyh,Pde2a,Polg,Prodh,Aldh18a1,Sdha,Sdhb,Sdhc,Sdhd,Sod1,Sod2,Spr,Tk2,Uqcrfs1,Pex11b,Suclg2,Sucla2,Aifm1,Sco2,Abcb6,Dnm1l,Tsfm,Ppif,Aass,Slc25a15,Micu1,Tomm40,Slc30a9,Txnrd2,Polg2,Park7,Acot7,Sirt3,Mto1,Poldip2,Htra2,Glrx2,Fis1,Rmdn1,Ttc19,Dars2,R…
18	Medullary carcinoma of thyroid	DisGeNET	0.040872	Bcl2,Bnip3,Casp3,Sardh,Got2,Hspa9,COX1,COX2,Sdhb,Sdhc,Sdhd,Prdx2,Tmem11,Sco2,Mrpl28,Phb2,Rpia,Pmpca,Mcat,Chpt1
18	Meningioma	DisGeNET	0.0470448	Bcl2,C1qbp,Casp3,Casp8,Cox8a,Cyc1,Etfa,Fasn,Got2,Gpx1,COX1,COX2,Mutyh,Nthl1,Sdhb,Sdhc,Sdhd,Txnrd1,Vdac2,Dnm1l,Ppif,Mrpl28,Diablo,Mul1,Slc25a21
19	Clumsiness - motor delay	DisGeNET	0.00461436	Acadsb,Acat1,Auh,Cat,Cox6b1,Cox8a,Cox10,Crat,Cyp27b1,Sardh,Hadha,Hadhb,Hadh,Letm1,Opa1,Pdk3,Aldh18a1,Sco1,Sdha,Sdhb,Sdhd,Spr,Tk2,Aldh5a1,Lonp1,Prepl,Sco2,Coq7,Wars2,Micu1,Lias,Fastkd2,Hibch,Coq2,Taco1,Gdap1,Nsun2,Mtpap,Dars2,Iars2,Agk,Nif3l1,Cox14,Gfm1,Cox20,Sdhaf1,Pet100
19	Adenocarcinoma of large intestine	DisGeNET	0.00974399	Bax,Bcl2,Casp3,Dld,Fhit,Hspa9,Hspe1,Letm1,COX2,Mtx1,Mutyh,Nthl1,Uqcrc2,Pdhx,Abcb6,Pnkd,Mcat,Slc25a26,Gstk1
19	Ketosis	DisGeNET	0.0182956	Acaa1a,Acadm,Acat1,Aldh2,Slc25a4,Bckdha,Bckdhb,Car5a,Cpt1a,Cpt2,Cyc1,Dbt,Gykl1,Hadhb,Ivd,Oxct1,Polg,Acaa2,Polg2,Mlycd,Mcat,Chpt1,Mccc2,Mmaa,Acsf3,Mmab
19	Complex partial seizures	DisGeNET	0.0222982	Abat,Acat1,Apex1,Bcl2,Cat,Cyp11a1,Idh2,Letm1,Polg,Sod2,Pnpla8,Acsf3
19	Adenoid cystic carcinoma of salivary gland	DisGeNET	0.0232287	Bcl2,Fhit,Lonp1
19	Pyruvate Dehydrogenase E1 Alpha Deficiency	DisGeNET	0.0232287	Pdha1,Pdhx,Lonp1
19	Generalized seizures	DisGeNET	0.0239777	Abat,Acat1,Apex1,Cat,Cyp11a1,Idh2,Letm1,Polg,Sod2,Tk2,Wars2,Mcat,Nsun2
19	CODAS syndrome	DisGeNET	0.0341106	Hspa9,Clpp,Aifm1,Lonp1
19	Congenital Epicanthus	DisGeNET	0.0344548	Comt,Hsd17b4,Letm1,Aldh6a1,Pdhx,Pex11b,Lonp1,Recql4,Prepl,Dhx30,Amacr,Fbxl4,Hibch,Slc25a24,Nsun2,Uqcc2
19	Congenital clubfoot	DisGeNET	0.0373171	Bcl2,Comt,Fasn,Hadha,Hadhb,Hsd17b4,Letm1,Aldh18a1,Recql4,Fars2,Fkbp8,Ptrh2,Gdap1,Dars2,Slc25a19,Fkbp10,Atad1
19	Conventional (Clear Cell) Renal Cell Carcinoma	DisGeNET	0.0395695	Acaca,Acadm,Acat1,Acly,Abcd1,Aldh9a1,Apex1,Arg2,Bax,Bcl2,Bcl2l2,Bik,Bnip3,C1qbp,Casp3,Casp8,Casp9,Cat,Cox6b1,Cox8a,Cpox,Cryz,Cyp24a1,Cyp27b1,Sardh,Echs1,Etfa,Fabp1,Acsl1,Fh1,Fhit,Fth1,Gls,Got2,Gpx1,Hspa9,Hspd1,Ldhb,Letm1,Maob,Mcl1,Aldh6a1,COX1,COX2,ND3,Ndufb6,Ndufs1,Ogg1,Pdhb,Pdk1,Pdk3,Slc25a3,Pycr1,Sdha,Sdhb,Sdhc,Sdhd,Sod2,Spg7,Prdx2,Tufm,Txnrd1,Ucp1,Uqcrc1,Uqcrfs1,Cox5a,Sco2,Abcb6,Mthfd2,Dhrs4,…
19	Deficiency of acetyl-CoA acetyltransferase	DisGeNET	0.0418635	Acaa1a,Acat1,Hadhb,Oxct1,Acaa2
19	ANOPHTHALMIA AND PULMONARY HYPOPLASIA	DisGeNET	0.0425294	Apex1,Aldh7a1,Bcat2,Bcl2,Bnip3,Tspo,C1qbp,Fasn,Fdps,Fhit,Glud1,Got2,Gpx1,Hspa9,Hspd1,Hspe1,Ldhb,Mcl1,Me2,COX2,Phb,Prkaca,Prodh,Spg7,Ucp1,Pdhx,Lonp1,Abcb6,Lrpprc,Htatip2,Yme1l1,Fastkd2,Mlycd,Pnkd,Poldip2,Bbc3,Mcat,Ociad1,Nln,Golph3,Immp2l,Smdt1,Sfxn1
19	Adult Burkitt Lymphoma	DisGeNET	0.0426435	Apex1,Bax,Bcl2,Bcl2l2,Slc25a20,Casp3,Cat,Cryz,Dut,Fh1,Fhit,Idh2,Mcl1,Pdk1,Spg7,Lonp1,Bcl2l11,Sirt4,Bbc3,Mcat
19	Childhood Burkitt Lymphoma	DisGeNET	0.0426435	Apex1,Bax,Bcl2,Bcl2l2,Slc25a20,Casp3,Cat,Cryz,Dut,Fh1,Fhit,Idh2,Mcl1,Pdk1,Spg7,Lonp1,Bcl2l11,Sirt4,Bbc3,Mcat
19	Teratoma	DisGeNET	0.0467796	Acat1,Bax,Bcl2,Fhit,Mcl1,Mettl8
22	Fleck corneal dystrophy	DisGeNET	0.0420228	Cox8a,Timm8a1,Gcdh
22	Hypoplasia of thumb	DisGeNET	0.0420228	Dhodh,Letm1,Recql4
22	Scoliosis, unspecified	DisGeNET	0.0420228	Abcb7,Acads,Abcd1,Aldh3a2,Comt,Fxn,Hsd17b4,Hspd1,Idh2,Letm1,Mpv17,Pycr1,Aldh18a1,Sdhb,Sdhc,Sdhd,Spg7,Tk2,Aifm1,Lonp1,Recql4,Mfn2,Pmpca,Slc25a24,Yars2,Ndufaf1,Gdap1,Nsun2,Atad3a,Foxred1,Iars2,Ndufa12,Rars2,Fkbp10,Pus1,Slc25a46,Mars2,Ndufaf6,Rnaseh1
24	Coronary heart disease	DisGeNET	0.0270096	Acaca,Acacb,Acads,Acat1,Aldh2,Apex1,Bax,Bcl2,C1qbp,Slc25a20,Cat,Ckmt2,Comt,Cox8a,Cps1,Cyp11b1,Cyp27a1,Decr1,Ephx2,Fabp1,Fhit,Fxn,Got2,Gpx1,Gsr,Guk1,Hspd1,Hspe1,Msra,COX1,COX2,Ndufs2,Ogdh,Ogg1,Opa1,Otc,Oxct1,Pcx,Sod1,Sod2,Spg7,Ucp1,Ucp2,Mfn2,Sco2,Abcb6,Tomm40,Mrpl28,Pmpca,Sirt4,Sirt3,Pdss1,Mthfd1l,Ak3,Dus2,Qrsl1,Chdh,Parl,Stard7,Nln,Agxt2,Flad1,Acad10,Ears2,Tamm41,Mmab,Gstk1
25	Prolactinoma	DisGeNET	0.0382311	Sdha,Sdhb,Lrpprc,Eral1,Macrod1,Qtrt1,Pgam5
25	Hurthle Cell Tumor	DisGeNET	0.0446123	Slc25a5,Bcl2,Bnip3,Casp3,Fh1,COX1,Sdha,Sdhb,Amacr
28	Giant Cell Arteritis	DisGeNET	0.0117412	COX2,Slc25a19,Mul1
28	Malignant Pleural Mesothelioma	DisGeNET	0.0137024	Acaca,Bcl2,C1qbp,Casp3,Casp8,Casp9,Cox8a,Cpox,Decr1,Fech,COX2,Sod2,Slc25a16,Cox5a,Park7,Mcat,Sphk2,Mul1
28	Nasopharyngeal carcinoma	DisGeNET	0.0158408	Aldh2,Apex1,Bak1,Bax,Bcl2,Bcl2l1,Tspo,Casp3,Casp8,Casp9,Cox7b,Cox8a,Cpox,Cpt1a,Decr1,Timm8a1,Fasn,Fh1,Fhit,Hspe1,Mcl1,COX2,Ndufb8,Ogg1,Pdk1,Phb,Polg,Sod1,Sod2,Star,Prdx2,Cox5a,Sco2,Bcl2l11,Dnm1l,Lrpprc,Prdx3,Immt,Lars2,Mlycd,Amacr,Txn2,Poldip2,Bbc3,Rmdn1,Triap1,Rmdn3,Agk,Mul1,Slc25a21,Mtfmt,Gstk1
28	Other Creutzfeldt-Jakob disease	DisGeNET	0.0160775	COX1,COX2,Sucla2,Mul1
28	Cerebral Aneurysm	DisGeNET	0.021652	Cox8a,Cpox,COX2,Acsm3,Cox5a
28	Endometriosis of uterus	DisGeNET	0.021652	Bcl2,Comt,COX2,Sod2,Mul1
28	Aspirin exacerbated respiratory disease	DisGeNET	0.024861	Cox8a,Cpox,Fabp1,COX1,COX2,Cox5a
28	Malignant Head and Neck Neoplasm	DisGeNET	0.0289107	Aldh2,Apex1,Bax,Bcl2,Bcl2l1,Casp3,Casp8,Casp9,Cox8a,Cpox,Fhit,Gpx1,Hspd1,Mcl1,COX2,ND4,Mutyh,Ogg1,Pdk2,Sod2,Alkbh1,Cox5a,Sco2,Bcl2l11,Poldip2,Bbc3,Pdf,Mul1,Coasy,Gstk1
28	Neurilemmoma	DisGeNET	0.0296947	Bid,Casp3,Casp9,Cox8a,COX2,Spg7,Mul1
28	Head and Neck Carcinoma	DisGeNET	0.0301156	Aldh2,Apex1,Bax,Bcl2,Bcl2l1,Casp3,Casp8,Casp9,Cox8a,Cpox,Fhit,Gpx1,Hspd1,Mcl1,Mgst1,COX2,ND4,Mutyh,Ogg1,Pdk2,Sod2,Alkbh1,Lonp1,Cox5a,Sco2,Bcl2l11,Poldip2,Bbc3,Mul1,Coasy,Gstk1
28	Malignant Glioma	DisGeNET	0.0301156	Bad,Bax,Bcl2,Bik,Bnip3,Tspo,Casp8,Cat,Cox8a,Cpox,Cyp27b1,Fth1,Gls,Got2,Idh2,Mcl1,COX2,Sod1,Spg7,Aifm1,Cox5a,Bcl2l11,Trap1,Poldip2,Snd1,Bbc3,Gls2,Diablo,Golph3,Mul1,Gstk1
28	Carcinoma of bladder	DisGeNET	0.030729	Ak4,Aldh2,Apex1,Bax,Bcl2,Bcl2l1,Tspo,Casp3,Casp8,Casp9,Cat,Comt,Cox7b,Cps1,Cpt1b,Crat,Cryz,Cyp27a1,Timm8a1,Sardh,Dna2,Etfa,Fasn,Fhit,Gls,Gpx1,Gstz1,Hspd1,Hspe1,Ldhb,Letm1,Lig3,Mcl1,COX1,COX2,CYTB,Mutyh,Ogg1,Oxa1l,Pdk1,Pdk4,Polb,Sdhb,Sod1,Sod2,Spg7,Prdx2,Top3a,Alkbh1,Mfn2,Sco2,Abcb6,Lrpprc,Htatip2,Mrpl28,Nudt6,Polg2,Abcb10,Mthfd1l,Poldip2,Bbc3,Gls2,Mcat,Echdc1,Agpat4,Chpt1,Rdh14,Golph3,Mrpl41,Mul1…
28	Carcinoma, Basal Cell	DisGeNET	0.0320924	Bax,Bcat2,Bcl2,Casp8,Cox8a,Cpox,Cryz,Cyp24a1,Cyp27a1,Cyp27b1,Etfa,Fhit,Mcl1,COX1,COX2,Ndufa1,Nthl1,Ogg1,Sod2,Slc25a16,Dnaja3,Cox5a,Recql4,Sco2,Abcb6,Sirt3,Poldip2,Rmdn3,Mul1,Slc25a43,Spata19,Gstk1
28	Malignant neoplasm of urinary bladder	DisGeNET	0.0348341	Ak4,Aldh2,Apex1,Bax,Bcl2,Bcl2l1,C1qbp,Casp3,Casp8,Casp9,Cat,Comt,Cox7b,Cps1,Cpt1b,Crat,Cryz,Cyp27a1,Cyp27b1,Timm8a1,Sardh,Dna2,Etfa,Fasn,Fh1,Fhit,Gls,Gpx1,Gstz1,Hspe1,Ldhb,Letm1,Lig3,Mcl1,COX1,COX2,CYTB,Mutyh,Ogg1,Oxa1l,Pdk1,Pdk4,Phb,Polb,Sdhb,Sod1,Sod2,Spg7,Prdx2,Top3a,Ucp2,Alkbh1,Mfn2,Sco2,Abcb6,Lrpprc,Htatip2,Mrpl28,Nudt6,Polg2,Abcb10,Amacr,Mthfd1l,Poldip2,Bbc3,Gls2,Mcat,Echdc1,Agpat4,Chpt1,Rd…
28	Cicatrix, Hypertrophic	DisGeNET	0.0388454	Bcl2,Casp3,Cox8a,Cpox,COX2,Cox5a,Diablo,Fkbp10,Slc25a32
28	Peptic Ulcer	DisGeNET	0.0388454	Bcl2,Cox8a,Cpox,Gsr,COX1,COX2,Alkbh1,Cox5a,Abcb6
28	Middle Cerebral Artery Occlusion	DisGeNET	0.0417434	Acaca,Agxt,Aldh2,Bax,Bcl2,Tspo,Casp3,Casp8,Casp9,Cat,Cox8a,Cpox,Decr1,Ephx2,Hspd1,Mcl1,COX2,Phb,Sod1,Sod2,Ucp2,Akap1,Alkbh1,Aifm1,Cox5a,Prdx6,Mfn2,Dnm1l,Prdx4,Park7,Poldip2,Rmdn1,Slc25a37,Rmdn3,Sphk2,Nln,Mul1,Coasy,Mcu
28	Creutzfeldt-Jakob disease	DisGeNET	0.0420228	Amt,Tspo,Casp3,COX1,COX2,Prdx2,Sucla2,Abcb6,Poldip2,Mul1
28	Extrapulmonary Small Cell Carcinoma	DisGeNET	0.0420228	Casp8,Cox8a,Cpox,COX2,Shmt2,Cox5a,Chpt1,Golph3,Ptges2,Gstk1
28	Lichen Planus, Oral	DisGeNET	0.0420228	Bax,Bcl2,Casp3,Cox8a,Cpox,Cyp24a1,Cyp27b1,COX2,Cox5a,Bbc3
28	Tricuspid Valve Insufficiency	DisGeNET	0.0420228	Cox7b,Hadha,Hadhb,Hccs,COX2,Sdhd,Mrps30,Slc25a24,Ndufb11,Mtpap
28	Von Hippel-Lindau Syndrome	DisGeNET	0.0420228	Sardh,Fech,Fhit,Idh2,COX2,Sdhb,Sdhc,Sdhd,Sdhaf2,Mul1
28	Malignant neoplasm of ovary	DisGeNET	0.0420228	Acaca,Aldh2,Apex1,Bad,Bax,Bcl2,Bcl2l1,Bnip3,Bphl,Casp3,Casp8,Casp9,Cat,Comt,Cox8a,Cpox,Cpt2,Cryz,Cs,Cyp27b1,Timm8a1,Dna2,Etfa,Fasn,Fhit,Gstz1,Hspa9,Hspd1,Hspe1,Nbr1,Mcl1,COX1,COX2,Mutyh,Nme3,Ogg1,Opa1,Pdk1,Pdk4,Phb,Slc25a3,Polb,Mrpl23,Sod1,Sod2,Spg7,Tfam,Uqcrfs1,Aldh5a1,Snap29,Cox5a,Armcx2,Mfn2,Sco2,Bcl2l11,Abcb6,Dnm1l,Lrpprc,Trap1,Micu1,Mrpl28,Tomm34,Phb2,Acot7,Sirt5,Sirt3,Prdx5,Pnkd,Poldip2,Bbc…
28	Agnosia for Pain	DisGeNET	0.0435411	Bid,Cat,Comt,Cox8a,Cpox,Gpx1,Mdh2,COX2,Sod1,Cox5a,Poldip2
28	Inflammatory dermatosis	DisGeNET	0.0435411	Acadvl,Tspo,Cat,Cox8a,Cpox,Decr1,COX2,Sod2,Cox5a,Poldip2,Mavs
28	Papillary thyroid carcinoma	DisGeNET	0.0457283	Bax,Bcl2,Casp3,Casp8,Casp9,Cox8a,Cpox,Cyp24a1,Cyp27b1,Decr1,Fasn,Gls,Gsr,Hspa9,Hspd1,Mcl1,COX2,Pcx,Phb,Prkaca,Sdhb,Sod2,Spg7,Cox5a,Prdx6,Sco2,Txnrd2,Polq,Rpia,Amacr,Poldip2,Stoml2,Rmdn1,Crot,Rmdn3,Agk,Sphk2,Mrpl41,Mrpl44,Mul1,Abhd11,Rtn4ip1,Cpt1c,Gstk1
28	Adult Lymphoma	DisGeNET	0.0470448	Apex1,Bad,Bak1,Bax,Bcl2,Bcl2l1,C1qbp,Casp3,Casp8,Casp9,Cat,Comt,Cox8a,Cpox,Fh1,Got2,Gpx1,Idh2,Maoa,Mcl1,COX2,Mtx1,Sod2,Spg7,Tfam,Ucp1,Cox5a,Recql4,Bcl2l11,Abcb6,Mrpl28,Phb2,Mlycd,Iscu,Poldip2,Snd1,Mcat,Nt5dc3,Diablo,Sphk2,Mul1,Ccdc51,Mtg1,Acsf3,Gstk1
28	Childhood Lymphoma	DisGeNET	0.0470448	Apex1,Bad,Bak1,Bax,Bcl2,Bcl2l1,C1qbp,Casp3,Casp8,Casp9,Cat,Comt,Cox8a,Cpox,Fh1,Got2,Gpx1,Idh2,Maoa,Mcl1,COX2,Mtx1,Sod2,Spg7,Tfam,Ucp1,Cox5a,Recql4,Bcl2l11,Abcb6,Mrpl28,Phb2,Mlycd,Iscu,Poldip2,Snd1,Mcat,Nt5dc3,Diablo,Sphk2,Mul1,Ccdc51,Mtg1,Acsf3,Gstk1
28	Aphasia	DisGeNET	0.0471017	Slc25a4,Cox7b,Hccs,COX1,COX2,COX3,ND1,ND4,ND5,ND6,Tomm40,Ndufb11
28	Leukoplakia, Oral	DisGeNET	0.0471017	Aldh2,Bax,Bcl2,Cox8a,Cpox,COX2,Ogg1,Polrmt,Cox5a,Abcb6,Mrpl28,Gstk1
28	Cytochrome-c Oxidase Deficiency	DisGeNET	0.0483502	Slc25a20,Cox4i1,Cox6a1,Cox6a2,Cox6b1,Cox7a1,Cox8a,Cox10,Cox15,Cpox,Ehhadh,Hadha,COX1,COX2,COX3,Ndufa4,Opa1,Sco1,Sod1,Surf1,Cox5a,Sco2,Cox17,Lrpprc,Fars2,Fastkd2,Sirt4,Sirt3,Ethe1,Coa3,Taco1,Cox16,Pink1,Mrpl44,Coa7,Gfm2,Cox4i2,Cep89,Cox14,Cox19,Mrrf,Cox20,Cox18,Coa5,Pet100,Pet117
29	Degenerative polyarthritis	DisGeNET	0.0388454	Abat,Acly,Ak4,Abcd2,Arg2,Bad,Bax,Bcl2,Bcl2l1,Bcs1l,Tspo,Mrpl49,Casp3,Casp8,Cat,Comt,Crat,Slc25a10,Decr1,Etfa,Fasn,Fh1,Gfer,Gls,Gpx1,Hadha,Hspd1,Idh2,Idh3a,Mcl1,Mpst,COX1,COX2,ND1,ND2,Mutyh,Ndufv1,Ndufs8,Oat,Opa1,Pdha1,Pdk1,Pdk2,Sdha,Shmt2,Sod1,Sod2,Prdx2,Tfam,Txnrd1,Uqcrfs1,Vdac2,Slc25a12,Slc25a27,Abcb6,Lrpprc,Trap1,Acaa2,Prdx4,Yme1l1,Immt,Polg2,Acsl6,Sirt3,Hars2,Prdx5,Poldip2,Hibch,Bbc3,Fis1,Rmd…
29	Peritoneal dissemination	DisGeNET	0.041152	Bax,Bik,Casp8,Fasn,COX2,Sfxn1
30	Cerebral Aneurysm	DisGeNET	0.0186329	Cox8a,Cpox,COX2,Acsm3,Cox5a
30	Aspirin exacerbated respiratory disease	DisGeNET	0.0227571	Cox8a,Cpox,Fabp1,COX1,COX2,Cox5a
30	Cicatrix, Hypertrophic	DisGeNET	0.0347691	Bcl2,Casp3,Cox8a,Cpox,COX2,Cox5a,Diablo,Fkbp10,Slc25a32
30	Peptic Ulcer	DisGeNET	0.0347691	Bcl2,Cox8a,Cpox,Gsr,COX1,COX2,Alkbh1,Cox5a,Abcb6
30	Extrapulmonary Small Cell Carcinoma	DisGeNET	0.0382311	Casp8,Cox8a,Cpox,COX2,Shmt2,Cox5a,Chpt1,Golph3,Ptges2,Gstk1
30	Lichen Planus, Oral	DisGeNET	0.0382311	Bax,Bcl2,Casp3,Cox8a,Cpox,Cyp24a1,Cyp27b1,COX2,Cox5a,Bbc3
30	Tricuspid Valve Insufficiency	DisGeNET	0.0382311	Cox7b,Hadha,Hadhb,Hccs,COX2,Sdhd,Mrps30,Slc25a24,Ndufb11,Mtpap
30	Agnosia for Pain	DisGeNET	0.040872	Bid,Cat,Comt,Cox8a,Cpox,Gpx1,Mdh2,COX2,Sod1,Cox5a,Poldip2
30	Inflammatory dermatosis	DisGeNET	0.040872	Acadvl,Tspo,Cat,Cox8a,Cpox,Decr1,COX2,Sod2,Cox5a,Poldip2,Mavs
30	Cytochrome-c Oxidase Deficiency	DisGeNET	0.0420228	Slc25a20,Cox4i1,Cox6a1,Cox6a2,Cox6b1,Cox7a1,Cox8a,Cox10,Cox15,Cpox,Ehhadh,Hadha,COX1,COX2,COX3,Ndufa4,Opa1,Sco1,Sod1,Surf1,Cox5a,Sco2,Cox17,Lrpprc,Fars2,Fastkd2,Sirt4,Sirt3,Ethe1,Coa3,Taco1,Cox16,Pink1,Mrpl44,Coa7,Gfm2,Cox4i2,Cep89,Cox14,Cox19,Mrrf,Cox20,Cox18,Coa5,Pet100,Pet117
30	Aphasia	DisGeNET	0.0420228	Slc25a4,Cox7b,Hccs,COX1,COX2,COX3,ND1,ND4,ND5,ND6,Tomm40,Ndufb11
30	Leukoplakia, Oral	DisGeNET	0.0420228	Aldh2,Bax,Bcl2,Cox8a,Cpox,COX2,Ogg1,Polrmt,Cox5a,Abcb6,Mrpl28,Gstk1
30	Nasopharyngeal carcinoma	DisGeNET	0.0467796	Aldh2,Apex1,Bak1,Bax,Bcl2,Bcl2l1,Tspo,Casp3,Casp8,Casp9,Cox7b,Cox8a,Cpox,Cpt1a,Decr1,Timm8a1,Fasn,Fh1,Fhit,Hspe1,Mcl1,COX2,Ndufb8,Ogg1,Pdk1,Phb,Polg,Sod1,Sod2,Star,Prdx2,Cox5a,Sco2,Bcl2l11,Dnm1l,Lrpprc,Prdx3,Immt,Lars2,Mlycd,Amacr,Txn2,Poldip2,Bbc3,Rmdn1,Triap1,Rmdn3,Agk,Mul1,Slc25a21,Mtfmt,Gstk1
30	Dejerine-Sottas Disease (disorder)	DisGeNET	0.0477965	Bcl2,Tspo,Casp3,Cat,Cox6a1,Decr1,COX2,Pxmp2,Ucp2,Mfn2,Amacr,Gdap1,Dhtkd1,Immp1l
30	Familial multiple trichoepitheliomata	DisGeNET	0.0477965	Apex1,Bcl2,Casp3,Cox8a,Cpox,Fabp1,Fhit,Mcl1,COX1,COX2,Cox5a,Mrpl28,Poldip2,Oma1
30	Metastatic melanoma	DisGeNET	0.0477965	Bcl2,Cox8a,Cpox,Etfa,Fasn,Hspd1,Idh2,COX2,Pdk1,Pdk3,Cox5a,Lypla1,Mrpl28,Prdx5
30	Osteoarthritis, Knee	DisGeNET	0.0477965	Acly,Bak1,Bax,Bcl2,Tspo,Cox8a,Cpox,Hspd1,COX2,Prdx2,Cox5a,Abcb6,Uqcc1,Nt5dc2
31	Global developmental delay	DisGeNET	0.0420228	Abat,Abcb7,Acadm,Acads,Acadsb,Aco2,Abcd1,Nudt2,Aldh7a1,Auh,Bcs1l,Slc25a20,Cat,Comt,Cox6b1,Cox7b,Cox8a,Cox10,Cox15,Cps1,Cyp27a1,Dlat,Dld,Sardh,Dna2,Echs1,Fh1,Gatm,Gcdh,Gfer,Gykl1,Gls,Glud1,Got2,Gpd2,Hsd17b10,Hadha,Hadhb,Hccs,Hsd17b4,Hspd1,Idh2,Ivd,Letm1,Maoa,Maob,Mdh2,Mipep,Aldh6a1,Mpv17,ATP6,COX2,ND1,ND2,ND3,Ndufa1,Ndufa2,Ndufa4,Ndufa6,Ndufa9,Ndufa10,Ndufb3,Ndufb8,Ndufb9,Ndufb10,Ndufs1,Ndufs2,Ndu…
33	Substance Dependence	DisGeNET	0.0483502	Aldh2,Comt,Ehhadh,Fhit,Maoa,Msra,Mpc1,Chchd3,C330018D20Rik
35	MYOTONIC DYSTROPHY 1	DisGeNET	0.0296947	Casp3,Cat,Dmpk,Hspd1,Oxa1l,Abcb6,Mpc1
35	Azoospermia	DisGeNET	0.0388454	Bcl2,Casp3,Cat,Dmpk,Oat,Scp2,Star,Txnrd2,Pank2
35	Pulmonary Fibrosis	DisGeNET	0.040872	Aco2,Bad,Bcl2,Tspo,Cat,Cox8a,Cryz,Cyp27b1,Decr1,Fasn,Gls,Hspd1,Ivd,COX2,Ogg1,Pdk1,Phb,Sod1,Sod2,Mfn2,Dnm1l,Lrpprc,Sirt3,Prdx5,Poldip2,Bbc3,Rmdn1,Sars2,Rmdn3,Mfn1,Sphk2,Mrps22,Fkbp10,Pink1,Mcu,Romo1,Pgam5,Gstk1
35	Cholelithiasis	DisGeNET	0.0420228	Apex1,Cat,Comt,Cyp27a1,Dmpk,Fech,Gpx1,Ogg1,Sod1,Gstk1
36	Basal Cell Nevus Syndrome	DisGeNET	0.0160775	Bax,Bcl2,Dmpk
36	Flap necrosis	DisGeNET	0.0160775	Bax,Bcl2,Cat
36	Granulomatous Disease, Chronic, X-Linked	DisGeNET	0.0227571	Bax,Cat,Decr1,CYTB
36	Aloof	DisGeNET	0.0354362	Apex1,Tspo,Casp3,Cat,Endog,Spg7
36	Anterior myocardial infarction	DisGeNET	0.0354362	Bax,Cat,Cox8a,Cpox,Sod1,Cox5a
36	Diabetes, Autoimmune	DisGeNET	0.0354362	Bax,Cat,Decr1,Hspd1,Aifm1,Eci2
36	Mammary gland tumor	DisGeNET	0.0354362	Bax,Bcl2,Casp9,Cat,Sod1,Mtch2
36	Psoriasis vulgaris	DisGeNET	0.0354362	Bax,Bcl2,Casp3,Cat,Qtrt1,Gstk1
36	Cryptorchidism	DisGeNET	0.0388454	Bax,Bcl2l1,Casp3,Cat,Comt,Cyp11a1,Dhodh,Dmpk,Gfer,Letm1,Pycr1,Sod1,Star,Pex11b,Lonp1,Recql4,Txnrd2,Paics,Hibch,Htra2,Slc25a24,Nsun2,Tmem70,Atad3a,Uqcc2,Atpaf2
36	MYOTONIC DYSTROPHY 1	DisGeNET	0.040872	Casp3,Cat,Dmpk,Hspd1,Oxa1l,Abcb6,Mpc1
36	Azoospermia	DisGeNET	0.0483502	Bcl2,Casp3,Cat,Dmpk,Oat,Scp2,Star,Txnrd2,Pank2
37	Squamous cell carcinoma of the head and neck	DisGeNET	0.0420228	Acaca,Acacb,Aldh2,Apex1,Arg2,Bax,Bcl2,Bcl2l1,Casp3,Casp8,Casp9,Cat,Comt,Cryz,Decr1,Timm8a1,Dlat,Fhit,Fth1,Gls,Gpx1,Idh2,Mcl1,COX1,COX2,COX3,CYTB,Mutyh,Oat,Ogg1,Oxa1l,Pdha1,Pdk1,Polb,Shmt2,Sod2,Prdx2,Tfam,Txnrd1,Uqcrfs1,Slc25a16,Dnaja3,Pmpcb,Sco2,Bcl2l11,Dnm1l,Lrpprc,Micu1,Prdx4,Mrpl28,Phb2,Acot7,Sirt4,Sirt3,Poldip2,Bbc3,Stoml2,Nsun2,Diablo,Mrpl41,Mul1,Nlrx1,Them4,Gstk1
41	Leprosy	DisGeNET	0.0105337	Acaca,Casp8,Cox4i1,Hspd1,Hspe1,Polg,Sdhd,Sod2,Tfam,Mfn2,Acot7,Acad8,Parl,Mavs,Pink1
41	Lactic Acidosis, Fatal Infantile	DisGeNET	0.0160775	ND1,Sod2,Suclg1,Pet100
41	Glioma	DisGeNET	0.0204806	Acat1,Apex1,Arl2,Bad,Bax,Bcl2,Bcl2l1,Bcl2l2,Bdh1,Bnip3,Tspo,C1qbp,Casp3,Casp8,Casp9,Cat,Cox4i1,Cox7a2,Cox8a,Cpox,Cry1,Cyc1,Cyp27b1,Dbt,Decr1,Timm8a1,Etfa,Acsl1,Fasn,Fdxr,Fech,Fpgs,Fxn,Fth1,Gldc,Gls,Glud1,Gpd2,Gpx1,Idh2,Maoa,Maob,Mcl1,COX1,COX2,Mutyh,Opa1,Oxct1,Pdk1,Pdk3,Pdk4,Phb,Slc25a3,Polb,Sdhc,Sdhd,Shmt2,Sod1,Sod2,Star,Prdx2,Tfam,Txnrd1,Uqcrc2,Uqcrfs1,Vdac2,Dap3,Suclg1,Dnaja3,Aifm1,Cox5a,Recql…
41	VITILIGO-ASSOCIATED MULTIPLE AUTOIMMUNE DISEASE SUSCEPTIBILITY 1 (finding)	DisGeNET	0.021652	Apex1,Bcl2,Cat,Comt,Decr1,Gpx1,Maob,Msra,COX2,Qdpr,Sod1,Sod2,Prdx2,Prdx6,Abcb6,Sirt3,Prdx5,Poldip2,Rmdn1,Cdk5rap1,Rmdn3,Nln,Myg1,Gstk1
41	Carcinoma of Endocrine Gland	DisGeNET	0.021652	Sdhb,Sdhc,Sdhd,Sod2,Sdhaf2
41	Hereditary Diffuse Gastric Cancer	DisGeNET	0.0227571	Apex1,Aldh7a1,Bcl2l1,Bid,Bnip3,Casp8,Echs1,Fhit,Hspd1,Idh3b,Mutyh,Ndufa2,Ndufs1,Ndufv1,Pdha1,Phb,Sod2,Suclg1,Trap1,Prdx5,Acad8,Mrps18b,Mrpl13,Mrps11,Pus1
41	Vitiligo	DisGeNET	0.0227571	Apex1,Bcl2,Cat,Comt,Decr1,Gpx1,Maob,Msra,COX2,Qdpr,Sod1,Sod2,Prdx2,Prdx6,Abcb6,Msrb2,Sirt3,Prdx5,Poldip2,Rmdn1,Cdk5rap1,Rmdn3,Nln,Myg1,Gstk1
41	Presenile dementia	DisGeNET	0.0368675	Abcd1,Aldh2,Bax,Bcl2,Tspo,Casp3,Comt,Dld,Sardh,Ephx2,Fdxr,Gls,Idh2,Maoa,Maob,COX2,Ndufs3,Opa1,Sdhb,Sod1,Sod2,Star,Tfam,Sucla2,Abcb6,Tomm40,Fastk,Park7,Acot7,Fastkd2,Prdx5,Chpt1,Pink1,Atpaf2,Chchd10
41	trachomatis	DisGeNET	0.0388454	Casp3,Decr1,Hspd1,Hspe1,Txnrd1,Acot7,Poldip2,Sars2,Gstk1
41	Renal carcinoma	DisGeNET	0.0391484	Aco2,Aldh9a1,Slc25a5,Arg2,Bcl2,Casp3,Casp8,Comt,Cryz,Cyp11b2,Cyp11b1,Decr1,Timm8a1,Dld,Sardh,Fasn,Fh1,Fhit,Gpx1,Hspd1,Mcl1,COX2,Ogg1,Pdk1,Prodh,Pycr1,Sdha,Sdhb,Sdhc,Sdhd,Sod2,Uqcrfs1,Sirt3,Amacr,Prdx5,Chpt1,Mul1
41	Astrocytoma	DisGeNET	0.0417434	Bax,Bcl2,Bcl2l1,Tspo,Casp3,Casp9,Cat,Cox8a,Cs,Decr1,Dut,Fth1,Hspd1,Hspe1,Idh2,Mcl1,Mpst,COX2,Slc25a3,Sdha,Sod1,Sod2,Spg7,Top3a,Akr7a5,Aifm1,Dnm1l,Mrpl28,Aldh1l1,Fastk,Prdx5,Poldip2,Gls2,Tfb1m,Sphk2,Chpt1,Golph3,Tfb2m,Gstk1
41	Cooley's anemia	DisGeNET	0.0420228	Cpt1a,Cpt2,Dhodh,Glud1,Pcx,Prdx2,Acot7,Prdx5,Chpt1,Gstk1
41	Urticaria	DisGeNET	0.0420228	Agxt,Aldh3a2,Cat,Gpx1,Sdhb,Sdhc,Sod1,Sod2,Lrpprc,Gstk1
41	Malignant neoplasm of ovary	DisGeNET	0.0420228	Acaca,Aldh2,Apex1,Bad,Bax,Bcl2,Bcl2l1,Bnip3,Bphl,Casp3,Casp8,Casp9,Cat,Comt,Cox8a,Cpox,Cpt2,Cryz,Cs,Cyp27b1,Timm8a1,Dna2,Etfa,Fasn,Fhit,Gstz1,Hspa9,Hspd1,Hspe1,Nbr1,Mcl1,COX1,COX2,Mutyh,Nme3,Ogg1,Opa1,Pdk1,Pdk4,Phb,Slc25a3,Polb,Mrpl23,Sod1,Sod2,Spg7,Tfam,Uqcrfs1,Aldh5a1,Snap29,Cox5a,Armcx2,Mfn2,Sco2,Bcl2l11,Abcb6,Dnm1l,Lrpprc,Trap1,Micu1,Mrpl28,Tomm34,Phb2,Acot7,Sirt5,Sirt3,Prdx5,Pnkd,Poldip2,Bbc…
41	Invasive Ductal Breast Carcinoma	DisGeNET	0.0435411	Nudt2,Bcl2,Casp3,Fhit,Hspe1,Maoa,COX2,Ndufs3,Sod2,Mcat,Pnpo
41	ovarian neoplasm	DisGeNET	0.0446123	Acaca,Aldh2,Apex1,Bad,Bax,Bcl2,Bcl2l1,Bnip3,Bphl,Casp3,Casp8,Casp9,Cat,Cbr3,Comt,Cox8a,Cpox,Cryz,Cs,Cyp27b1,Decr1,Timm8a1,Etfa,Fasn,Fhit,Gstz1,Hspa9,Hspd1,Hspe1,Idh2,Nbr1,Mcl1,COX1,COX2,CYTB,Mtx1,Nme3,Ogg1,Opa1,Pdk1,Pdk4,Phb,Slc25a3,Polb,Prkaca,Mrpl23,Sod1,Sod2,Spg7,Tfam,Uqcrc1,Uqcrfs1,Aldh5a1,Snap29,Cox5a,Mfn2,Sco2,Bcl2l11,Abcb6,Dnm1l,Lrpprc,Trap1,Micu1,Mrpl28,Tomm34,Phb2,Acot7,Sirt5,Sirt3,Prdx5…
43	Prehypertension	DisGeNET	0.0144196	Acaca,Cat,Mfn2,Coasy
43	Diabetic Retinopathy	DisGeNET	0.0239777	Aldh2,Bax,Bcl2,Casp3,Casp8,Cat,Decr1,Sardh,Gfer,Gsr,COX2,Ogg1,Sdhb,Sod1,Sod2,Ucp1,Ucp2,Mfn2,Timm44,Txnrd2,Sirt5,Sirt4,Sirt3,Txn2,Poldip2,Rmdn1,Rmdn3,Adcy10,Mrpl14,Pink1,Romo1
43	Acute Lung Injury	DisGeNET	0.0382311	Bax,Bcl2,Casp3,Casp8,Cat,Ephx2,Gsr,Opa1,Mfn2,Mfn1
43	Prediabetes syndrome	DisGeNET	0.040872	Cat,Pdk1,Spr,Ucp1,Ucp2,Ucp3,Mfn2,Sirt3,Pnpla8,Ptrh2,Ptrh1
43	Fibromyalgia	DisGeNET	0.0420228	Tspo,Cat,Comt,Gpx1,Gsr,Maoa,Maob,CYTB,Sod1,Mfn2,Abcb6,Golph3
43	Fatty Liver, Alcoholic	DisGeNET	0.0446123	Acaca,Acacb,Aldh2,Cat,Cps1,Opa1,Otc,Sod1,Sod2,Suox,Ucp2,Mfn2,Fis1
43	Miscarriage	DisGeNET	0.0446123	Bax,Cat,Cox8a,Cyp24a1,Cyp27b1,Gls,Hspd1,Sod1,Sod2,Ucp2,Mfn2,Slc25a21,Gstk1
43	Cardiomyopathy, Familial Idiopathic	DisGeNET	0.0467796	Acaca,Slc25a4,Slc25a5,Nudt2,Aldh7a1,Bcl2,Bdh1,Tspo,Casp3,Cat,Cox4i1,Cox8a,Cpt1a,Cpt2,Cyp11b1,Dbt,Eci1,Decr1,Fasn,Got2,Gpx1,Hspa9,Maoa,COX2,CYTB,Opa1,Pcca,Pccb,Pde2a,Pdk1,Phb,Sdha,Sdhb,Sod1,Sod2,Tk2,Ucp1,Ucp2,Vdac1,Dnaja3,Mfn2,Txnrd2,Sirt3,Txn2,Pnpo,Chpt1,Nif3l1,Cox4i2,Sfxn1,Ppm1k,Gstk1,Timm23
43	Asthenozoospermia	DisGeNET	0.0477965	Casp3,Cs,Ephx2,Maoa,COX1,CYTB,Ndufs3,Phb,Sod1,Prdx2,Vdac2,Mfn2,Poldip2,Adcy10
43	Dejerine-Sottas Disease (disorder)	DisGeNET	0.0477965	Bcl2,Tspo,Casp3,Cat,Cox6a1,Decr1,COX2,Pxmp2,Ucp2,Mfn2,Amacr,Gdap1,Dhtkd1,Immp1l
43	Motor Neuron Disease	DisGeNET	0.0477965	Bcl2,Cat,Cox8a,Decr1,COX1,Sod1,Sod2,Aifm1,Mfn2,Prdx3,Park7,Rhot1,Gstk1,Chchd10
44	Gastrointestinal Stromal Sarcoma	DisGeNET	0.0160775	Sdha,Sdhb,Sdhc
44	Neoplasm of small intestine	DisGeNET	0.0160775	Sdha,Sdhb,Sdhc
44	Pulmonary chondroma	DisGeNET	0.0160775	Sdha,Sdhb,Sdhc
44	Malignant Paraganglionic Neoplasm	DisGeNET	0.0227571	Sardh,Sdha,Sdhb,Sdhd
44	Noncompaction cardiomyopathy	DisGeNET	0.0227571	Sdha,Sdhb,Sdhd,Sdhaf1
44	Phyllodes Tumor	DisGeNET	0.0227571	Fasn,Fhit,Sdha,Sdhb
44	Carney Triad	DisGeNET	0.0289107	Sardh,Sdha,Sdhb,Sdhc,Sdhd
44	Mitochondrial Complex II Deficiency	DisGeNET	0.0289107	Sardh,Sdha,Sdhb,Sdhd,Sdhaf1
44	Extra-Adrenal Paraganglioma	DisGeNET	0.0354362	Sardh,Sdha,Sdhb,Sdhc,Sdhd,Sdhaf2
44	Succinate-coenzyme Q reductase deficiency	DisGeNET	0.0354362	Sardh,Sdha,Sdhb,Sdhd,Isca2,Sdhaf1
44	hereditary paraganglioma	DisGeNET	0.040872	Sardh,Sdha,Sdhb,Sdhc,Sdhd,Lonp1,Sdhaf2
44	Hereditary Paraganglioma-Pheochromocytoma Syndrome	DisGeNET	0.040872	Fh1,Mdh2,Sdha,Sdhb,Sdhc,Sdhd,Sdhaf2
44	Multiple Endocrine Neoplasia Type 1	DisGeNET	0.040872	Casp8,Cyp24a1,Sdha,Sdhb,Sdhc,Sdhd,Ucp1
44	Prolactinoma	DisGeNET	0.040872	Sdha,Sdhb,Lrpprc,Eral1,Macrod1,Qtrt1,Pgam5
44	Vesico-Ureteral Reflux	DisGeNET	0.040872	Comt,Sdha,Sdhb,Sdhd,Recql4,Pycr2,Sdhaf1
44	Keratoderma, Palmoplantar	DisGeNET	0.0435411	Fech,Sdha,Sdhb,Sdhc,Sdhd,Snap29,Recql4,Txnrd2
44	Capillary hemangioma of retina	DisGeNET	0.0483502	Dlst,Fh1,Mdh2,Sdha,Sdhb,Sdhc,Sdhd,Slc25a11,Sdhaf2
44	Cranial nerve compression	DisGeNET	0.0483502	Dlst,Fh1,Mdh2,Sdha,Sdhb,Sdhc,Sdhd,Slc25a11,Sdhaf2
44	Episodic paroxysmal anxiety	DisGeNET	0.0483502	Dlst,Fh1,Mdh2,Sdha,Sdhb,Sdhc,Sdhd,Slc25a11,Sdhaf2
44	Hurthle Cell Tumor	DisGeNET	0.0483502	Slc25a5,Bcl2,Bnip3,Casp3,Fh1,COX1,Sdha,Sdhb,Amacr
44	Pulsatile Tinnitus	DisGeNET	0.0483502	Dlst,Fh1,Mdh2,Sdha,Sdhb,Sdhc,Sdhd,Slc25a11,Sdhaf2
47	Bronchial Hyperreactivity	DisGeNET	0.00709412	Casp8,Ndufa2,Sod2,Uqcrc2,Gstk1
49	Toxoplasmosis	DisGeNET	0.0158408	Bax,Fdps,Hspd1,COX1,Phb2,Immp1l
49	Diabetes	DisGeNET	0.0227571	Acaca,Acacb,Alas1,Aldh2,Abcd2,Slc25a4,Bad,Bax,Bcl2,Bid,Tspo,C1qbp,Slc25a20,Casp3,Casp8,Casp9,Cat,Comt,Cpox,Cps1,Cpt1a,Cpt2,Cry1,Cryz,Cs,Cyc1,Cyp11b1,Cyp24a1,Cyp27a1,Cyp27b1,Decr1,Dlat,Dld,Fabp1,Acsl1,Fasn,Fdps,Fxn,Gatm,Gfer,Gykl1,Got2,Gpx1,Gsr,Hspd1,Letm1,Maoa,COX1,COX2,CYTB,ND1,ND5,Mutyh,Oat,Ogg1,Oxa1l,Pcx,Pck2,Pdk4,Phb,Slc25a3,Sod1,Sod2,Spg7,Spr,Tfam,Tst,Ucp1,Ucp2,Ucp3,Vdac1,Pdhx,Akap1,Sucla2,L…
49	Frontotemporal Lobar Degeneration	DisGeNET	0.0232287	Tspo,Cat,Gls,Pdk1,Phb,Sod1,Sod2,Tomm40,Phb2
49	Oestrogen receptor positive breast cancer	DisGeNET	0.0477965	Apex1,Bax,Bcl2,Comt,Cyc1,Fasn,Gls,Maoa,Pdk1,Phb,Star,Tfam,Txnrd1,Ppif,Mrps30,Phb2,Sirt4,Ociad1,Mul1,Gstk1
50	Squamous cell carcinoma of esophagus	DisGeNET	0.0348892	Acaca,Acadl,Aldh2,Apex1,Aldh7a1,Bax,Bcl2,Bcl2l1,Bnip3,Slc25a20,Casp3,Casp8,Casp9,Comt,Cox8a,Cpox,Cpt1a,Cryz,Cyp11a1,Cyp24a1,Decr1,Timm8a1,Fasn,Fhit,Gls,Gpd2,Hmgcs2,Idh2,Ldhb,Letm1,Lig3,Maoa,Mcl1,COX1,COX2,Mutyh,Ogg1,Pdha1,Pdk1,Phb,Polb,Shmt2,Sod2,Prdx2,Ucp1,Ung,Aifm1,Lonp1,Cox5a,Prdx6,Sco2,Dnm1l,Trap1,Htatip2,Mrpl28,Polq,Phb2,Acot7,Sirt4,Sirt3,Abcb10,Mto1,Letmd1,Mthfd1l,Poldip2,Mcat,Pycr2,Stoml2,…
50	Condition, Preneoplastic	DisGeNET	0.0352489	Acadsb,Aldh2,Bcat2,Cat,Cps1,Fth1,Hadh,Phb,Sod2,Aldh4a1,Uqcr11,Trit1,Higd2a
50	Hypoglycemia	DisGeNET	0.0380072	Acadl,Acadm,Acadsb,Acadvl,Acat1,Auh,Bckdha,Bckdhb,Bcs1l,Bid,Car5a,Slc25a20,Cpt1a,Cpt2,Dbt,Timm8a1,Dguok,Dld,Etfa,Etfb,Etfdh,Gcdh,Gykl1,Glud1,Gsr,Hsd17b10,Hadha,Hadh,Hmgcl,Hmgcs2,Mpv17,ND1,ND2,ND3,Ndufa1,Ndufa6,Ndufb3,Ndufb9,Ndufb10,Ndufs1,Ndufs2,Ndufs3,Ndufv1,Ndufs4,Ndufs8,Ndufv2,Otc,Pcx,Pcca,Pccb,Pck2,Sod2,Star,Tfam,Ucp2,Uqcrb,Uqcrc2,Suclg1,Prepl,Dnm1l,Lrpprc,Wars2,Mlycd,Mto1,Ndufaf3,Uqcrq,Gls2,…
50	Squamous cell carcinoma of the head and neck	DisGeNET	0.0446123	Acaca,Acacb,Aldh2,Apex1,Arg2,Bax,Bcl2,Bcl2l1,Casp3,Casp8,Casp9,Cat,Comt,Cryz,Decr1,Timm8a1,Dlat,Fhit,Fth1,Gls,Gpx1,Idh2,Mcl1,COX1,COX2,COX3,CYTB,Mutyh,Oat,Ogg1,Oxa1l,Pdha1,Pdk1,Polb,Shmt2,Sod2,Prdx2,Tfam,Txnrd1,Uqcrfs1,Slc25a16,Dnaja3,Pmpcb,Sco2,Bcl2l11,Dnm1l,Lrpprc,Micu1,Prdx4,Mrpl28,Phb2,Acot7,Sirt4,Sirt3,Poldip2,Bbc3,Stoml2,Nsun2,Diablo,Mrpl41,Mul1,Nlrx1,Them4,Gstk1
50	Exotropia	DisGeNET	0.0483502	Acadsb,Hadha,Sco2,Wars2,Ptrh2,Mrps34,Lyrm7,Slc25a46
51	MYOTONIC DYSTROPHY 1	DisGeNET	0.0347691	Casp3,Cat,Dmpk,Hspd1,Oxa1l,Abcb6,Mpc1
51	Azoospermia	DisGeNET	0.0420228	Bcl2,Casp3,Cat,Dmpk,Oat,Scp2,Star,Txnrd2,Pank2
51	Cholelithiasis	DisGeNET	0.0446123	Apex1,Cat,Comt,Cyp27a1,Dmpk,Fech,Gpx1,Ogg1,Sod1,Gstk1
52	Global developmental delay	DisGeNET	0.000217856	Abat,Abcb7,Acadm,Acads,Acadsb,Aco2,Abcd1,Nudt2,Aldh7a1,Auh,Bcs1l,Slc25a20,Cat,Comt,Cox6b1,Cox7b,Cox8a,Cox10,Cox15,Cps1,Cyp27a1,Dlat,Dld,Sardh,Dna2,Echs1,Fh1,Gatm,Gcdh,Gfer,Gykl1,Gls,Glud1,Got2,Gpd2,Hsd17b10,Hadha,Hadhb,Hccs,Hsd17b4,Hspd1,Idh2,Ivd,Letm1,Maoa,Maob,Mdh2,Mipep,Aldh6a1,Mpv17,ATP6,COX2,ND1,ND2,ND3,Ndufa1,Ndufa2,Ndufa4,Ndufa6,Ndufa9,Ndufa10,Ndufb3,Ndufb8,Ndufb9,Ndufb10,Ndufs1,Ndufs2,Ndu…
52	Hypertrichosis	DisGeNET	0.00306356	Acaca,Bcs1l,Cox10,Cox15,Cpox,Echs1,Ndufa2,Ndufa4,Ndufa9,Ndufa10,Ndufb8,Ndufs1,Ndufs2,Ndufs3,Ndufv1,Ndufs4,Ndufs8,Ndufv2,Pdha1,Sdha,Surf1,Sco2,Ndufaf3,Slc25a24,Taco1,Lipt1,Foxred1,Ndufa12,Ndufaf5,Ndufaf2,Sfxn1,Mtfmt,Ndufaf6,Ndufs7,Pet100
52	Nystagmus	DisGeNET	0.00322592	Abcb7,Aco2,Slc25a4,Bcs1l,Slc25a20,Cox8a,Cox10,Cox15,Dguok,Dlat,Echs1,Fdxr,Fxn,Hsd17b10,Hsd17b4,Hspd1,Idh3a,Idh3b,Letm1,Mpv17,ATP6,ND1,ND2,ND3,ND4,ND5,ND6,Ndufa1,Ndufa2,Ndufa4,Ndufa6,Ndufa9,Ndufa10,Ndufb3,Ndufb8,Ndufb9,Ndufb10,Ndufs1,Ndufs2,Ndufs3,Ndufv1,Ndufs4,Ndufs8,Ndufv2,Opa1,Pdha1,Phyh,Polg,Sdha,Sdhb,Sdhd,Spg7,Surf1,Tufm,Pex11b,Lonp1,Recql4,Sco2,Dnm1l,Wars2,Afg3l2,Rpia,Pmpca,Prdx5,Ndufaf3,Par…
52	Mood swings	DisGeNET	0.00427337	Bcs1l,Cox10,Cox15,Sardh,Echs1,Maoa,Ndufa2,Ndufa4,Ndufa9,Ndufa10,Ndufs1,Ndufs2,Ndufs3,Ndufv1,Ndufs4,Ndufs8,Ndufv2,Pdha1,Polg,Prkaca,Sdha,Sod1,Surf1,Taco1,Lipt1,Mtpap,Foxred1,Ndufa12,Ndufaf5,Pank2,Ndufaf2,Mtfmt,Ndufaf6,Nags,Ndufs7,Chchd10,Pet100
52	Severe intellectual disability	DisGeNET	0.00509697	Acat1,Aco2,Bcs1l,Cox15,Dbt,Dmpk,Echs1,Hmgcl,Letm1,Maoa,ATP6,Ndufa2,Ndufa4,Ndufa9,Ndufa10,Ndufs1,Ndufs2,Ndufs3,Ndufv1,Ndufs4,Ndufs8,Ndufv2,Pdha1,Phyh,Pycr1,Sdha,Surf1,Aldh5a1,Suclg1,Snap29,Wars2,Uqcrq,Pycr2,Taco1,Lipt1,Nsun2,Tmem70,Foxred1,Ndufa12,Ndufaf5,L2hgdh,Ndufaf2,Timm50,Mtfmt,Ndufaf6,Iba57,Ndufs7,Pet100
52	Blepharoptosis	DisGeNET	0.00576109	Slc25a4,Bcs1l,C1qbp,Comt,Cox6b1,Cox8a,Cox10,Cox15,Dguok,Dlat,Dna2,Echs1,Gfer,Letm1,Maoa,Mpv17,COX1,COX2,COX3,ND1,ND2,ND3,ND4,ND5,ND6,Ndufa1,Ndufa2,Ndufa4,Ndufa6,Ndufa9,Ndufa10,Ndufb3,Ndufb9,Ndufb10,Ndufs1,Ndufs2,Ndufs3,Ndufv1,Ndufs4,Ndufs8,Ndufv2,Opa1,Pdha1,Phyh,Polg,Sco1,Sdha,Sdhd,Spr,Surf1,Tk2,Top3a,Pex11b,Sucla2,Lonp1,Prepl,Sco2,Dnm1l,Micu1,Slc30a9,Fars2,Afg3l2,Polg2,Fastkd2,Ndufaf3,Pars2,Coq2…
52	Ptosis	DisGeNET	0.00576109	Slc25a4,Bcl2,Bcs1l,C1qbp,Comt,Cox6b1,Cox8a,Cox10,Cox15,Dguok,Dlat,Dna2,Echs1,Gfer,Letm1,Maoa,COX1,COX2,COX3,ND1,ND2,ND3,ND4,ND5,ND6,Ndufa1,Ndufa2,Ndufa4,Ndufa6,Ndufa9,Ndufa10,Ndufb3,Ndufb9,Ndufb10,Ndufs1,Ndufs2,Ndufs3,Ndufv1,Ndufs4,Ndufs8,Ndufv2,Opa1,Pdha1,Phyh,Polg,Sco1,Sdha,Sdhd,Spr,Surf1,Tk2,Top3a,Pex11b,Sucla2,Lonp1,Prepl,Sco2,Dnm1l,Micu1,Slc30a9,Fars2,Afg3l2,Polg2,Fastkd2,Ndufaf3,Pars2,Coq2,…
52	Leigh Disease	DisGeNET	0.00709412	Bcs1l,Cox4i1,Cox8a,Cox10,Cox15,Cpox,Crat,Dld,Echs1,Fxn,ATP6,COX1,COX3,CYTB,ND1,ND2,ND3,ND4,ND5,ND6,Ndufa1,Ndufa2,Ndufa5,Ndufa9,Ndufa10,Ndufs1,Ndufs2,Ndufs3,Ndufv1,Ndufs4,Ndufs8,Ndufv2,Ogdh,Pdha1,Pdhb,Polg,Sdha,Sdhb,Sod2,Surf1,Txnrd1,Pdhx,Suclg1,Sucla2,Cox5a,Sco2,Tsfm,Lrpprc,Fars2,Lias,Ethe1,Mto1,Ndufaf3,Hibch,Uqcrq,Ndufaf4,Coq4,Taco1,Timmdc1,Lipt1,Pdp1,Ttc19,Ptcd3,Parl,Foxred1,Trmu,Iars2,Ndufa12,…
52	Choreoathetosis	DisGeNET	0.00959924	Dlat,Gcdh,Gldc,Hsd17b10,Hspd1,Mipep,ATP6,Ndufa1,Ndufa9,Pdha1,Polg,Qdpr,Spr,Suox,Slc30a9,Pnkd,Guf1,Mrps34,Ndufaf5,Slc25a22,Pank2,Opa3,Clpb,Pnpt1,Nadk2,Slc25a42
52	Oppositional Defiant Disorder	DisGeNET	0.00999522	Comt,Maoa,Maob
52	Paranoid Schizophrenia	DisGeNET	0.00999522	Comt,Maoa,Maob
52	Cerebral atrophy	DisGeNET	0.0140828	Aldh2,Auh,Bcs1l,Tspo,Cyp27a1,Dguok,Dmpk,Fh1,Ndufa2,Ndufa9,Ndufs1,Ndufs2,Ndufv1,Ndufv2,Pcca,Pccb,Pdha1,Polg,Tk2,Suclg1,Sucla2,Aifm1,Dnm1l,Wars2,Fars2,Yme1l1,Dhx30,Prdx5,Pars2,Fbxl4,Coq2,Htra2,Trit1,Nsun2,Ttc19,Dars2,Coq9,Rars2,Trmt5,Cars2,Nars2,Slc25a22,Clpb,Serac1,Lyrm7,Timm50,Mars2,Nadk2,Iba57
52	Retinitis Pigmentosa	DisGeNET	0.0160775	Aldh3a2,Arl2,Aldh7a1,Bcl2,Bcs1l,C1qbp,Cox6b1,Cox7b,Cox8a,Cox10,Cox15,Echs1,Fasn,Gykl1,Hadha,Hadhb,Hadh,Hccs,Idh2,Idh3a,Idh3b,ATP6,CYTB,ND1,ND2,ND3,ND4,ND5,ND6,Ndufa2,Ndufa4,Ndufa9,Ndufa10,Ndufs1,Ndufs2,Ndufs3,Ndufv1,Ndufs4,Ndufs8,Ndufv2,Otc,Pdha1,Phyh,Polg,Aldh18a1,Sco1,Sdha,Sdhb,Sdhd,Sod1,Surf1,Tst,Aifm1,Snap29,Fastkd2,Amacr,Poldip2,Trnt1,Taco1,Lipt1,Cycs,Ndufb11,Foxred1,Ndufa12,Ndufaf5,Pank2,Co…
52	Progressive cerebellar ataxia	DisGeNET	0.0172329	Auh,Cox15,Echs1,Fxn,Gls,Ndufa2,Ndufa4,Ndufa9,Ndufa10,Ndufs1,Ndufs2,Ndufs3,Ndufv1,Ndufs4,Ndufs8,Ndufv2,Pdha1,Polg,Sdha,Surf1,Aifm1,Slc25a15,Pitrm1,Afg3l2,Pmpca,Coq2,Taco1,Lipt1,Mtpap,Dars2,Foxred1,Ndufa12,Ndufaf5,Ndufaf2,Mgme1,Mars2,Mtfmt,Ndufaf6,Ndufs7,Chchd10,Pet100
52	Failure to Thrive	DisGeNET	0.0186329	Acads,Aco2,Agxt,Ak2,Abcd1,Slc25a4,Auh,Bcs1l,Casp8,Comt,Cox6b1,Cox7b,Cox8a,Cox10,Cox15,Cps1,Cyp11a1,Cyp11b1,Cyp24a1,Cyp27b1,Dguok,Dld,Echs1,Fh1,Gatm,Gcdh,Got2,Hadha,Hadhb,Hadh,Hccs,Hsd17b4,Letm1,Mdh2,Mipep,Mpv17,ATP6,ND1,ND2,ND3,ND4,ND5,ND6,Ndufa1,Ndufa2,Ndufa4,Ndufa6,Ndufa9,Ndufa10,Ndufb3,Ndufb8,Ndufb9,Ndufb10,Ndufs1,Ndufs2,Ndufs3,Ndufv1,Ndufs4,Ndufs8,Ndufv2,Otc,Pcca,Pccb,Pdha1,Slc25a3,Polg,Pycr1…
52	EAR, PATELLA, SHORT STATURE SYNDROME	DisGeNET	0.0194933	Comt,Fasn,Maob,Sod1
52	Elastosis perforans serpiginosa	DisGeNET	0.0194933	Comt,Fasn,Maob,Sod1
52	Gambling, Pathological	DisGeNET	0.0194933	Comt,Maoa,Maob,Chpt1
52	Strabismus	DisGeNET	0.0203379	Abcb7,Aco2,Slc25a4,Aldh7a1,Bcs1l,Comt,Cox10,Cox15,Dguok,Dhodh,Sardh,Dmpk,Echs1,Gykl1,Hsd17b4,Hspd1,Letm1,Mdh2,ND1,ND2,ND3,Ndufa1,Ndufa2,Ndufa4,Ndufa6,Ndufa9,Ndufa10,Ndufb3,Ndufb9,Ndufb10,Ndufs1,Ndufs2,Ndufs3,Ndufv1,Ndufs4,Ndufs8,Ndufv2,Opa1,Pdha1,Pycr1,Aldh18a1,Sdha,Surf1,Aldh5a1,Pex11b,Sucla2,Lonp1,Recql4,Dnm1l,Lrpprc,Fars2,Yme1l1,Dhx30,Ndufaf3,Hibch,Ndufaf4,Slc25a24,Yars2,Ndufaf1,Taco1,Glrx5,Ti…
52	Dyskinetic syndrome	DisGeNET	0.0227571	Comt,Echs1,Gcdh,Gpx1,Maoa,Maob,ATP6,ND1,ND2,ND3,ND4,ND5,ND6,Ndufb8,Ndufs2,Ndufs4,Ndufs8,Polg,Sod2,Surf1,Ucp2,Sco2,Wars2,Slc30a9,Park7,Ndufaf3,Pnkd,Pars2,Htra2,Mecr,Nsun2,Pink1,Slc25a22,Pnpt1
52	Early-Stage Breast Carcinoma	DisGeNET	0.024861	Bcl2,Bcs1l,Comt,Etfa,Fasn,COX2,Pycr1,Phb2,Eral1,Htra2
52	Neonatal Hypotonia	DisGeNET	0.0257566	Abat,Cpt2,Dlat,Gls,Hadh,Hsd17b4,Letm1,Sdha,Sdhd,Tufm,Pdhx,Prepl,Sco2,Tsfm,Mrps16,Coq4,Pdss2,Lyrm4,Slc25a22,Clpb,Uqcc2,Timm50,Ears2,Glyctk,Nadk2,Sdhaf1
52	Leukodystrophy	DisGeNET	0.0259709	Abat,Abcd1,Cox10,Cox15,Cps1,Sardh,Echs1,Hsd17b4,Hspa9,Hspd1,Mpv17,ND1,ND2,ND3,Ndufa1,Ndufa2,Ndufa4,Ndufa6,Ndufa9,Ndufa10,Ndufb3,Ndufb8,Ndufb9,Ndufb10,Ndufs1,Ndufs2,Ndufs3,Ndufv1,Ndufs4,Ndufs8,Ndufv2,Pcx,Pdha1,Sdha,Sdhb,Surf1,Tufm,Aifm1,Sco2,Abcb6,Prdx5,Ndufaf3,Fbxl4,Nfu1,Ndufaf4,Pycr2,Ndufaf1,Taco1,Glrx5,Timmdc1,Lipt1,Ndufb11,Rmnd1,Dars2,Foxred1,Tmem126b,Ndufa12,Aars2,Ndufaf5,Nubpl,Isca1,Pnpt1,Nd…
52	Abnormal involuntary movement	DisGeNET	0.0289107	Comt,Maoa,Maob,Sod2,Pank2
52	Conduct Disorder	DisGeNET	0.0289107	Aldh2,Comt,Gldc,Maoa,Maob
52	Oestrogen receptor positive breast cancer	DisGeNET	0.0378775	Apex1,Bax,Bcl2,Comt,Cyc1,Fasn,Gls,Maoa,Pdk1,Phb,Star,Tfam,Txnrd1,Ppif,Mrps30,Phb2,Sirt4,Ociad1,Mul1,Gstk1
52	Advanced breast cancer	DisGeNET	0.0397025	Fasn,Gls,Maoa,Sod2,Abcb6,Snd1
52	Delusions	DisGeNET	0.0397025	Bcl2,Comt,Cyp27a1,Maob,Slc25a13,Aldh1l1
52	Pheochromocytoma, Extra-Adrenal	DisGeNET	0.0420228	Comt,Dlst,Sardh,Fh1,Maoa,Maob,Mdh2,Sdha,Sdhb,Sdhc,Sdhd,Slc25a11,Sdhaf2
52	Unipolar Depression	DisGeNET	0.0463748	Bcl2,Tspo,Cat,Comt,Cry1,Timm8a1,Fhit,Fth1,Gls,Maoa,Maob,Msra,COX2,Ndufv1,Ndufv2,Sod1,Star,Kmo,Tomm40,Amacr,Pink1,Acsm1,Nat8l
52	Luminal A Breast Carcinoma	DisGeNET	0.0467796	Acaca,Bcl2,Fasn,Gls,Maoa,Mpst,Aldh18a1
52	Schizoaffective Disorder	DisGeNET	0.0467796	Comt,Maoa,Prodh,Acsl6,Sirt5,Mccc2,Ppm1k
52	MITOCHONDRIAL COMPLEX I DEFICIENCY	DisGeNET	0.0481122	Slc25a10,ND1,ND2,ND3,ND4,Ndufa1,Ndufa6,Ndufb3,Ndufb8,Ndufb9,Ndufb10,Ndufs1,Ndufs2,Ndufs3,Ndufv1,Ndufs4,Ndufs8,Ndufv2,Aifm1,Sirt3,Ndufaf3,Ndufaf4,Ndufaf1,Timmdc1,Gdap1,Ndufb11,Foxred1,Tmem126b,Elac2,Ndufaf5,Nubpl,Ndufaf2,Ndufaf6,Ndufs7
52	Optic Atrophy	DisGeNET	0.0486325	Aco2,Agxt,Auh,Bcl2,Bcs1l,Comt,Cox6b1,Cox8a,Cox10,Cox15,Decr1,Timm8a1,Dguok,Sardh,Dmpk,Echs1,Fdxr,Fh1,Fxn,Hsd17b10,Idh3a,Idh3b,Letm1,Mipep,ATP6,COX1,COX2,COX3,CYTB,ND1,ND2,ND3,ND4,ND4L,ND5,ND6,Ndufa2,Ndufa4,Ndufa9,Ndufa10,Ndufb8,Ndufs1,Ndufs2,Ndufs3,Ndufv1,Ndufs4,Ndufs8,Ndufv2,Oat,Opa1,Pdha1,Polg,Sco1,Sdha,Sdhd,Spg7,Ssbp1,Surf1,Tk2,Txnrd1,Pdhx,Pex11b,Snap29,Recql4,Mfn2,Sco2,Dnm1l,Tsfm,Wars2,Micu1,…
53	Fetal Distress	DisGeNET	0.0232287	Aldh7a1,ND1,ND2,ND3,Ndufa1,Ndufa6,Ndufb3,Ndufb9,Ndufb10,Ndufs1,Ndufs2,Ndufs3,Ndufv1,Ndufs4,Ndufs8,Ndufv2,Ndufaf3,Ndufaf4,Ndufaf1,Timmdc1,Ndufb11,Foxred1,Tmem126b,Ndufaf5,Nubpl,Ndufaf2,Ndufs7
53	Abnormal mitochondria in muscle tissue	DisGeNET	0.0256764	ND1,ND2,ND3,Ndufa1,Ndufa6,Ndufb3,Ndufb9,Ndufb10,Ndufs1,Ndufs2,Ndufs3,Ndufv1,Ndufs4,Ndufs8,Ndufv2,Sdha,Sdhd,Afg3l2,Ndufaf3,Ndufaf4,Ndufaf1,Timmdc1,Ndufb11,Foxred1,Tmem126b,Ndufaf5,Nubpl,Ndufaf2,Ndufs7,Sdhaf1
53	MITOCHONDRIAL COMPLEX I DEFICIENCY	DisGeNET	0.0295082	Slc25a10,ND1,ND2,ND3,ND4,Ndufa1,Ndufa6,Ndufb3,Ndufb8,Ndufb9,Ndufb10,Ndufs1,Ndufs2,Ndufs3,Ndufv1,Ndufs4,Ndufs8,Ndufv2,Aifm1,Sirt3,Ndufaf3,Ndufaf4,Ndufaf1,Timmdc1,Gdap1,Ndufb11,Foxred1,Tmem126b,Elac2,Ndufaf5,Nubpl,Ndufaf2,Ndufaf6,Ndufs7
53	Nicotinamide adenine dinucleotide coenzyme Q reductase deficiency	DisGeNET	0.0353545	Slc25a10,ND1,ND3,ND5,ND6,Ndufa1,Ndufa2,Ndufa9,Ndufa10,Ndufb3,Ndufb6,Ndufb8,Ndufb9,Ndufb10,Ndufs1,Ndufs2,Ndufs3,Ndufv1,Ndufs4,Ndufs8,Ndufv2,Polg,Sod2,Slc25a27,Pdss1,Mto1,Ndufaf3,Acad9,Ndufaf4,Ndufaf1,Ndufb11,Foxred1,Tmem126b,Ndufa12,Rars2,Elac2,Nubpl,Ndufaf2,Ndufaf6,Ndufs7
54	Dejerine-Sottas Disease (disorder)	DisGeNET	0.0420228	Bcl2,Tspo,Casp3,Cat,Cox6a1,Decr1,COX2,Pxmp2,Ucp2,Mfn2,Amacr,Gdap1,Dhtkd1,Immp1l
57	Chemically-Induced Liver Toxicity	DisGeNET	0.0222099	Aldh9a1,Bax,Bdh1,Cat,Cps1,Dbt,Dlat,Echs1,Acsl1,Fasn,Gsr,Hadha,Ndufs3,Ogdh,Pcx,Pdk4,Polg,Sod1,Sod2,Suox,Aifm1,Aass,Immt,Park7,Lap3,Hao2,Ociad1,Echdc1,Mccc1,Coq9,Rdh13,Slc25a29,Aldh1l2,Pptc7
57	Drug-Induced Acute Liver Injury	DisGeNET	0.0222099	Aldh9a1,Bax,Bdh1,Cat,Cps1,Dbt,Dlat,Echs1,Acsl1,Fasn,Gsr,Hadha,Ndufs3,Ogdh,Pcx,Pdk4,Polg,Sod1,Sod2,Suox,Aifm1,Aass,Immt,Park7,Lap3,Hao2,Ociad1,Echdc1,Mccc1,Coq9,Rdh13,Slc25a29,Aldh1l2,Pptc7
57	Hepatitis, Drug-Induced	DisGeNET	0.0222099	Aldh9a1,Bax,Bdh1,Cat,Cps1,Dbt,Dlat,Echs1,Acsl1,Fasn,Gsr,Hadha,Ndufs3,Ogdh,Pcx,Pdk4,Polg,Sod1,Sod2,Suox,Aifm1,Aass,Immt,Park7,Lap3,Hao2,Ociad1,Echdc1,Mccc1,Coq9,Rdh13,Slc25a29,Aldh1l2,Pptc7
57	Hepatitis, Toxic	DisGeNET	0.0222099	Aldh9a1,Bax,Bdh1,Cat,Cps1,Dbt,Dlat,Echs1,Acsl1,Fasn,Gsr,Hadha,Ndufs3,Ogdh,Pcx,Pdk4,Polg,Sod1,Sod2,Suox,Aifm1,Aass,Immt,Park7,Lap3,Hao2,Ociad1,Echdc1,Mccc1,Coq9,Rdh13,Slc25a29,Aldh1l2,Pptc7
57	Chemical and Drug Induced Liver Injury	DisGeNET	0.0301156	Ak4,Aldh2,Aldh9a1,Bad,Bax,Bdh1,Casp8,Cat,Comt,Cps1,Dbt,Dlat,Echs1,Endog,Acsl1,Fasn,Gfer,Gsr,Hadha,ND6,Ndufs3,Ogdh,Pcx,Pdk4,Polg,Sod1,Sod2,Suox,Aifm1,Aass,Immt,Park7,Lap3,Hao2,Ociad1,Echdc1,Mccc1,Coq9,Gpt2,Rdh13,Slc25a29,Aldh1l2,Pptc7
57	Congenital lactic acidosis	DisGeNET	0.0324686	Cox8a,Cpox,COX1,Ogdh,Pdha1,Pdhx,Cox5a,Fbxl4,Rmnd1,Pet100
57	Pyruvate Dehydrogenase Complex Deficiency Disease	DisGeNET	0.0388454	Dlat,Dld,Echs1,Gstz1,Pdha1,Pdhb,Pdk4,Pdhx,Lonp1,Lipt1,Pdp1,Chpt1
57	Primary biliary cirrhosis	DisGeNET	0.041152	Apex1,Bcl2,Dbt,Dlat,Dlst,Fh1,Gatm,Hspd1,Ogdh,Pdk4,Pdhx,Timmdc1,Pdp1
58	Hyperprolinemia	DisGeNET	0.0232287	Prodh,Aldh4a1,Slc25a22
58	Deficiency of acetyl-CoA acetyltransferase	DisGeNET	0.0418635	Acaa1a,Acat1,Hadhb,Oxct1,Acaa2
59	Diabetic Nephropathy	DisGeNET	0.0420228	Acacb,Aldh2,Amt,Apex1,Arg2,Bcl2,Bnip3,Casp3,Casp8,Casp9,Cat,Cox8a,Cpt1a,Cpt1b,Cpt2,Cryz,Cyp11b1,Cyp24a1,Cyp27b1,Decr1,Ephx2,Fabp1,Fasn,Gpx1,Gsr,COX1,COX2,Ndufs3,Pdk1,Sod1,Sod2,Ucp1,Ucp2,Ucp3,Vdac1,Vdac2,Akap1,Alkbh1,Aifm1,Pick1,Mfn2,Dnm1l,Timm44,Sirt4,Sirt3,Poldip2,Hebp1,Fis1,Rmdn1,Triap1,Thg1l,Rmdn3,Chpt1,Nlrx1,Gstk1
59	Thyroid carcinoma	DisGeNET	0.0420228	Acaca,Arg2,Bax,Bcat2,Bcl2,Bid,Bnip3,Tspo,Casp3,Casp8,Cat,Cox8a,Cpox,Cryz,Cyp24a1,Decr1,Sardh,Etfa,Fh1,Fhit,Got2,Gpd2,Gpx1,Hspa9,Idh2,Letm1,Mcl1,COX1,COX2,ND1,Mutyh,Oxa1l,Pdk1,Sdhb,Sdhd,Spg7,Txnrd1,Vdac1,Cox5a,Tomm20,Trap1,Timm44,Txnrd2,Sirt4,Sirt3,Prdx5,Poldip2,Stoml2,Mief1,Agk,Mul1,Ptges2,Rtn4ip1,Cmpk2,Gstk1
59	Diabetes Mellitus, Experimental	DisGeNET	0.0456907	Abat,Acaa1a,Alas1,Arg2,Bad,Bax,Bckdha,Bckdhb,Bcl2,Bcl2l1,Bdh1,Casp3,Casp8,Casp9,Cat,Comt,Cps1,Cpt1a,Cpt1b,Cyp11a1,Cyp11b2,Cyp27b1,Dhodh,Acsl1,Gpd2,Gpx1,Gsr,Guk1,Hadh,Hmgcl,Hmgcs2,Hspd1,COX2,CYTB,ND1,Ndufs2,Ndufs3,Ogg1,Otc,Oxct1,Pcx,Pdk4,Polg,Qdpr,Scp2,Sod1,Sod2,Star,Txnrd1,Ucp2,Ucp3,Vdac1,Aifm1,Mfn2,Tomm40,Timm44,Txnrd2,Acot2,Acsl6,Txn2,Gpam
63	Mammary Carcinoma, Human	DisGeNET	0.0184159	Nudt2,Bax,Bcl2,C1qbp,Casp8,Cat,Comt,Cpt1a,Cyp24a1,Fasn,Gpx1,Hadhb,Ldhb,Ndufs3,Pde2a,Phb,Sod2,Dap3,Mrpl19,Mrps28,Mrpl13,Mrps7,Mrps23,Rmnd1,Cmc2,Mrps22,Mrpl9,Ldhal6b,Mtfmt,Gstk1
63	Flap necrosis	DisGeNET	0.021652	Bax,Bcl2,Cat
63	Granulomatous Disease, Chronic, X-Linked	DisGeNET	0.0289107	Bax,Cat,Decr1,CYTB
63	Rhegmatogenous retinal detachment	DisGeNET	0.0289107	Bax,Bcl2,Casp3,Mtfmt
63	Aloof	DisGeNET	0.0420228	Apex1,Tspo,Casp3,Cat,Endog,Spg7
63	Anterior myocardial infarction	DisGeNET	0.0420228	Bax,Cat,Cox8a,Cpox,Sod1,Cox5a
63	Diabetes, Autoimmune	DisGeNET	0.0420228	Bax,Cat,Decr1,Hspd1,Aifm1,Eci2
63	Mammary gland tumor	DisGeNET	0.0420228	Bax,Bcl2,Casp9,Cat,Sod1,Mtch2
63	Psoriasis vulgaris	DisGeNET	0.0420228	Bax,Bcl2,Casp3,Cat,Qtrt1,Gstk1
63	Colon Carcinoma	DisGeNET	0.0432727	Acaca,Acat1,Acly,Aldh2,Aldh1b1,Apex1,Aldh7a1,Bax,Bcl2,Bcl2l1,Bcl2l2,Bnip3,Bphl,C1qbp,Casp3,Casp8,Casp9,Cat,Comt,Cox8a,Cpox,Crat,Cryz,Cyp24a1,Cyp27b1,Decr1,Timm8a1,Dguok,Dld,Endog,Fabp1,Acsl1,Fasn,Fdxr,Fech,Fh1,Fhit,Fpgs,Fxn,Fth1,Gfer,Gls,Gpx1,Hmgcs2,Hsd17b4,Hspd1,Ldhb,Mcl1,Mpst,COX1,COX2,COX3,Mtx1,Mutyh,Ndufc2,Nme4,Ogg1,Oxa1l,Pdk1,Pdk4,Slc25a3,Polb,Ppox,Prodh,Shmt2,Sod1,Sod2,Ssbp1,Prdx2,Tfam,Txnr…
63	Deuteranomaly	DisGeNET	0.0477965	Bax,Gldc,Prdx5,Poldip2,Rmdn1,Rmdn3,Mrs2
65	Sensorineural Hearing Loss (disorder)	DisGeNET	0.0420228	Acadvl,Ak2,Abcd1,Bcs1l,Cat,Cox6b1,Cox8a,Cox10,Cox15,Timm8a1,Dguok,Echs1,Gfer,Hsd17b10,Hsd17b4,Idh3a,Idh3b,ATP6,COX1,COX2,COX3,ND1,ND2,ND3,ND4,ND5,ND6,Ndufa1,Ndufa6,Ndufb3,Ndufb9,Ndufb10,Ndufs1,Ndufs2,Ndufs3,Ndufv1,Ndufs4,Ndufs8,Ndufv2,Ogdh,Opa1,Pdk3,Phyh,Polg,Aldh18a1,Sco1,Sdha,Sdhd,Sod2,Surf1,Tk2,Top3a,Pex11b,Sucla2,Aifm1,Snap29,Lonp1,Mfn2,Sco2,Dnm1l,Tsfm,Txnrd2,Yme1l1,Immt,Fastkd2,Lars2,Hars2,N…
66	Congenital diaphragmatic hernia	DisGeNET	0.0435411	Cox7b,Gfer,Hccs,Letm1,Sdha,Ndufb11,Chdh,Gstk1
73	Hypertrichosis	DisGeNET	0.00216141	Acaca,Bcs1l,Cox10,Cox15,Cpox,Echs1,Ndufa2,Ndufa4,Ndufa9,Ndufa10,Ndufb8,Ndufs1,Ndufs2,Ndufs3,Ndufv1,Ndufs4,Ndufs8,Ndufv2,Pdha1,Sdha,Surf1,Sco2,Ndufaf3,Slc25a24,Taco1,Lipt1,Foxred1,Ndufa12,Ndufaf5,Ndufaf2,Sfxn1,Mtfmt,Ndufaf6,Ndufs7,Pet100
73	Mood swings	DisGeNET	0.00304217	Bcs1l,Cox10,Cox15,Sardh,Echs1,Maoa,Ndufa2,Ndufa4,Ndufa9,Ndufa10,Ndufs1,Ndufs2,Ndufs3,Ndufv1,Ndufs4,Ndufs8,Ndufv2,Pdha1,Polg,Prkaca,Sdha,Sod1,Surf1,Taco1,Lipt1,Mtpap,Foxred1,Ndufa12,Ndufaf5,Pank2,Ndufaf2,Mtfmt,Ndufaf6,Nags,Ndufs7,Chchd10,Pet100
73	Global developmental delay	DisGeNET	0.00306356	Abat,Abcb7,Acadm,Acads,Acadsb,Aco2,Abcd1,Nudt2,Aldh7a1,Auh,Bcs1l,Slc25a20,Cat,Comt,Cox6b1,Cox7b,Cox8a,Cox10,Cox15,Cps1,Cyp27a1,Dlat,Dld,Sardh,Dna2,Echs1,Fh1,Gatm,Gcdh,Gfer,Gykl1,Gls,Glud1,Got2,Gpd2,Hsd17b10,Hadha,Hadhb,Hccs,Hsd17b4,Hspd1,Idh2,Ivd,Letm1,Maoa,Maob,Mdh2,Mipep,Aldh6a1,Mpv17,ATP6,COX2,ND1,ND2,ND3,Ndufa1,Ndufa2,Ndufa4,Ndufa6,Ndufa9,Ndufa10,Ndufb3,Ndufb8,Ndufb9,Ndufb10,Ndufs1,Ndufs2,Ndu…
73	Strabismus	DisGeNET	0.00402726	Abcb7,Aco2,Slc25a4,Aldh7a1,Bcs1l,Comt,Cox10,Cox15,Dguok,Dhodh,Sardh,Dmpk,Echs1,Gykl1,Hsd17b4,Hspd1,Letm1,Mdh2,ND1,ND2,ND3,Ndufa1,Ndufa2,Ndufa4,Ndufa6,Ndufa9,Ndufa10,Ndufb3,Ndufb9,Ndufb10,Ndufs1,Ndufs2,Ndufs3,Ndufv1,Ndufs4,Ndufs8,Ndufv2,Opa1,Pdha1,Pycr1,Aldh18a1,Sdha,Surf1,Aldh5a1,Pex11b,Sucla2,Lonp1,Recql4,Dnm1l,Lrpprc,Fars2,Yme1l1,Dhx30,Ndufaf3,Hibch,Ndufaf4,Slc25a24,Yars2,Ndufaf1,Taco1,Glrx5,Ti…
73	Blepharoptosis	DisGeNET	0.00402726	Slc25a4,Bcs1l,C1qbp,Comt,Cox6b1,Cox8a,Cox10,Cox15,Dguok,Dlat,Dna2,Echs1,Gfer,Letm1,Maoa,Mpv17,COX1,COX2,COX3,ND1,ND2,ND3,ND4,ND5,ND6,Ndufa1,Ndufa2,Ndufa4,Ndufa6,Ndufa9,Ndufa10,Ndufb3,Ndufb9,Ndufb10,Ndufs1,Ndufs2,Ndufs3,Ndufv1,Ndufs4,Ndufs8,Ndufv2,Opa1,Pdha1,Phyh,Polg,Sco1,Sdha,Sdhd,Spr,Surf1,Tk2,Top3a,Pex11b,Sucla2,Lonp1,Prepl,Sco2,Dnm1l,Micu1,Slc30a9,Fars2,Afg3l2,Polg2,Fastkd2,Ndufaf3,Pars2,Coq2…
73	Ptosis	DisGeNET	0.00402726	Slc25a4,Bcl2,Bcs1l,C1qbp,Comt,Cox6b1,Cox8a,Cox10,Cox15,Dguok,Dlat,Dna2,Echs1,Gfer,Letm1,Maoa,COX1,COX2,COX3,ND1,ND2,ND3,ND4,ND5,ND6,Ndufa1,Ndufa2,Ndufa4,Ndufa6,Ndufa9,Ndufa10,Ndufb3,Ndufb9,Ndufb10,Ndufs1,Ndufs2,Ndufs3,Ndufv1,Ndufs4,Ndufs8,Ndufv2,Opa1,Pdha1,Phyh,Polg,Sco1,Sdha,Sdhd,Spr,Surf1,Tk2,Top3a,Pex11b,Sucla2,Lonp1,Prepl,Sco2,Dnm1l,Micu1,Slc30a9,Fars2,Afg3l2,Polg2,Fastkd2,Ndufaf3,Pars2,Coq2,…
73	Severe intellectual disability	DisGeNET	0.00522298	Acat1,Aco2,Bcs1l,Cox15,Dbt,Dmpk,Echs1,Hmgcl,Letm1,Maoa,ATP6,Ndufa2,Ndufa4,Ndufa9,Ndufa10,Ndufs1,Ndufs2,Ndufs3,Ndufv1,Ndufs4,Ndufs8,Ndufv2,Pdha1,Phyh,Pycr1,Sdha,Surf1,Aldh5a1,Suclg1,Snap29,Wars2,Uqcrq,Pycr2,Taco1,Lipt1,Nsun2,Tmem70,Foxred1,Ndufa12,Ndufaf5,L2hgdh,Ndufaf2,Timm50,Mtfmt,Ndufaf6,Iba57,Ndufs7,Pet100
73	Hypertrophic Cardiomyopathy	DisGeNET	0.00788962	Acaca,Acadl,Acadvl,Slc25a4,Bcl2,Bcs1l,Casp3,Cox6b1,Cox7b,Cox8a,Cox10,Cox15,Cpt1a,Cyp11b1,Dld,Sardh,Dmpk,Echs1,Fasn,Fxn,Hsd17b10,Hadha,Hadh,Hccs,Hspd1,Idh2,Mipep,ATP6,COX1,COX2,COX3,CYTB,ND1,ND2,ND3,ND4,ND5,ND6,Ndufa1,Ndufa2,Ndufa4,Ndufa6,Ndufa9,Ndufa10,Ndufb3,Ndufb8,Ndufb9,Ndufb10,Ndufs1,Ndufs2,Ndufs3,Ndufv1,Ndufs4,Ndufs8,Ndufv2,Opa1,Pdha1,Slc25a3,Sco1,Sdha,Sdhb,Sdhd,Star,Surf1,Suclg1,Sco2,Htatip…
73	Nicotinamide adenine dinucleotide coenzyme Q reductase deficiency	DisGeNET	0.0117412	Slc25a10,ND1,ND3,ND5,ND6,Ndufa1,Ndufa2,Ndufa9,Ndufa10,Ndufb3,Ndufb6,Ndufb8,Ndufb9,Ndufb10,Ndufs1,Ndufs2,Ndufs3,Ndufv1,Ndufs4,Ndufs8,Ndufv2,Polg,Sod2,Slc25a27,Pdss1,Mto1,Ndufaf3,Acad9,Ndufaf4,Ndufaf1,Ndufb11,Foxred1,Tmem126b,Ndufa12,Rars2,Elac2,Nubpl,Ndufaf2,Ndufaf6,Ndufs7
73	Progressive cerebellar ataxia	DisGeNET	0.0133256	Auh,Cox15,Echs1,Fxn,Gls,Ndufa2,Ndufa4,Ndufa9,Ndufa10,Ndufs1,Ndufs2,Ndufs3,Ndufv1,Ndufs4,Ndufs8,Ndufv2,Pdha1,Polg,Sdha,Surf1,Aifm1,Slc25a15,Pitrm1,Afg3l2,Pmpca,Coq2,Taco1,Lipt1,Mtpap,Dars2,Foxred1,Ndufa12,Ndufaf5,Ndufaf2,Mgme1,Mars2,Mtfmt,Ndufaf6,Ndufs7,Chchd10,Pet100
73	Fetal Distress	DisGeNET	0.0143975	Aldh7a1,ND1,ND2,ND3,Ndufa1,Ndufa6,Ndufb3,Ndufb9,Ndufb10,Ndufs1,Ndufs2,Ndufs3,Ndufv1,Ndufs4,Ndufs8,Ndufv2,Ndufaf3,Ndufaf4,Ndufaf1,Timmdc1,Ndufb11,Foxred1,Tmem126b,Ndufaf5,Nubpl,Ndufaf2,Ndufs7
73	Failure to Thrive	DisGeNET	0.018203	Acads,Aco2,Agxt,Ak2,Abcd1,Slc25a4,Auh,Bcs1l,Casp8,Comt,Cox6b1,Cox7b,Cox8a,Cox10,Cox15,Cps1,Cyp11a1,Cyp11b1,Cyp24a1,Cyp27b1,Dguok,Dld,Echs1,Fh1,Gatm,Gcdh,Got2,Hadha,Hadhb,Hadh,Hccs,Hsd17b4,Letm1,Mdh2,Mipep,Mpv17,ATP6,ND1,ND2,ND3,ND4,ND5,ND6,Ndufa1,Ndufa2,Ndufa4,Ndufa6,Ndufa9,Ndufa10,Ndufb3,Ndufb8,Ndufb9,Ndufb10,Ndufs1,Ndufs2,Ndufs3,Ndufv1,Ndufs4,Ndufs8,Ndufv2,Otc,Pcca,Pccb,Pdha1,Slc25a3,Polg,Pycr1…
73	Leukodystrophy	DisGeNET	0.0197841	Abat,Abcd1,Cox10,Cox15,Cps1,Sardh,Echs1,Hsd17b4,Hspa9,Hspd1,Mpv17,ND1,ND2,ND3,Ndufa1,Ndufa2,Ndufa4,Ndufa6,Ndufa9,Ndufa10,Ndufb3,Ndufb8,Ndufb9,Ndufb10,Ndufs1,Ndufs2,Ndufs3,Ndufv1,Ndufs4,Ndufs8,Ndufv2,Pcx,Pdha1,Sdha,Sdhb,Surf1,Tufm,Aifm1,Sco2,Abcb6,Prdx5,Ndufaf3,Fbxl4,Nfu1,Ndufaf4,Pycr2,Ndufaf1,Taco1,Glrx5,Timmdc1,Lipt1,Ndufb11,Rmnd1,Dars2,Foxred1,Tmem126b,Ndufa12,Aars2,Ndufaf5,Nubpl,Isca1,Pnpt1,Nd…
73	Abnormal mitochondria in muscle tissue	DisGeNET	0.021652	ND1,ND2,ND3,Ndufa1,Ndufa6,Ndufb3,Ndufb9,Ndufb10,Ndufs1,Ndufs2,Ndufs3,Ndufv1,Ndufs4,Ndufs8,Ndufv2,Sdha,Sdhd,Afg3l2,Ndufaf3,Ndufaf4,Ndufaf1,Timmdc1,Ndufb11,Foxred1,Tmem126b,Ndufaf5,Nubpl,Ndufaf2,Ndufs7,Sdhaf1
73	Nystagmus	DisGeNET	0.0227571	Abcb7,Aco2,Slc25a4,Bcs1l,Slc25a20,Cox8a,Cox10,Cox15,Dguok,Dlat,Echs1,Fdxr,Fxn,Hsd17b10,Hsd17b4,Hspd1,Idh3a,Idh3b,Letm1,Mpv17,ATP6,ND1,ND2,ND3,ND4,ND5,ND6,Ndufa1,Ndufa2,Ndufa4,Ndufa6,Ndufa9,Ndufa10,Ndufb3,Ndufb8,Ndufb9,Ndufb10,Ndufs1,Ndufs2,Ndufs3,Ndufv1,Ndufs4,Ndufs8,Ndufv2,Opa1,Pdha1,Phyh,Polg,Sdha,Sdhb,Sdhd,Spg7,Surf1,Tufm,Pex11b,Lonp1,Recql4,Sco2,Dnm1l,Wars2,Afg3l2,Rpia,Pmpca,Prdx5,Ndufaf3,Par…
73	Leigh Disease	DisGeNET	0.0259709	Bcs1l,Cox4i1,Cox8a,Cox10,Cox15,Cpox,Crat,Dld,Echs1,Fxn,ATP6,COX1,COX3,CYTB,ND1,ND2,ND3,ND4,ND5,ND6,Ndufa1,Ndufa2,Ndufa5,Ndufa9,Ndufa10,Ndufs1,Ndufs2,Ndufs3,Ndufv1,Ndufs4,Ndufs8,Ndufv2,Ogdh,Pdha1,Pdhb,Polg,Sdha,Sdhb,Sod2,Surf1,Txnrd1,Pdhx,Suclg1,Sucla2,Cox5a,Sco2,Tsfm,Lrpprc,Fars2,Lias,Ethe1,Mto1,Ndufaf3,Hibch,Uqcrq,Ndufaf4,Coq4,Taco1,Timmdc1,Lipt1,Pdp1,Ttc19,Ptcd3,Parl,Foxred1,Trmu,Iars2,Ndufa12,…
73	MITOCHONDRIAL COMPLEX I DEFICIENCY	DisGeNET	0.0315764	Slc25a10,ND1,ND2,ND3,ND4,Ndufa1,Ndufa6,Ndufb3,Ndufb8,Ndufb9,Ndufb10,Ndufs1,Ndufs2,Ndufs3,Ndufv1,Ndufs4,Ndufs8,Ndufv2,Aifm1,Sirt3,Ndufaf3,Ndufaf4,Ndufaf1,Timmdc1,Gdap1,Ndufb11,Foxred1,Tmem126b,Elac2,Ndufaf5,Nubpl,Ndufaf2,Ndufaf6,Ndufs7
73	Oestrogen receptor positive breast cancer	DisGeNET	0.0348892	Apex1,Bax,Bcl2,Comt,Cyc1,Fasn,Gls,Maoa,Pdk1,Phb,Star,Tfam,Txnrd1,Ppif,Mrps30,Phb2,Sirt4,Ociad1,Mul1,Gstk1
73	Leigh Syndrome Due To Mitochondrial Complex II Deficiency	DisGeNET	0.0352464	Bcs1l,Cox10,Cox15,Ndufa1,Ndufa2,Ndufa9,Ndufa10,Ndufs1,Ndufs3,Ndufv1,Ndufs4,Ndufs8,Ndufv2,Pdha1,Sdha,Surf1,Suclg1,Sucla2,Sco2,Lrpprc,Fars2,Ethe1,Uqcrq,Taco1,Ttc19,Ptcd3,Foxred1,Iars2,Ndufa12,Nars2,Gfm2,Gfm1,Ndufs7,Pet100,Pet117
73	Leigh Syndrome due to Mitochondrial Complex III Deficiency	DisGeNET	0.0352464	Bcs1l,Cox10,Cox15,Ndufa1,Ndufa2,Ndufa9,Ndufa10,Ndufs1,Ndufs3,Ndufv1,Ndufs4,Ndufs8,Ndufv2,Pdha1,Sdha,Surf1,Suclg1,Sucla2,Sco2,Lrpprc,Fars2,Ethe1,Uqcrq,Taco1,Ttc19,Ptcd3,Foxred1,Iars2,Ndufa12,Nars2,Gfm2,Gfm1,Ndufs7,Pet100,Pet117
73	Leigh Syndrome due to Mitochondrial Complex IV Deficiency	DisGeNET	0.0352464	Bcs1l,Cox10,Cox15,Ndufa1,Ndufa2,Ndufa9,Ndufa10,Ndufs1,Ndufs3,Ndufv1,Ndufs4,Ndufs8,Ndufv2,Pdha1,Sdha,Surf1,Suclg1,Sucla2,Sco2,Lrpprc,Fars2,Ethe1,Uqcrq,Taco1,Ttc19,Ptcd3,Foxred1,Iars2,Ndufa12,Nars2,Gfm2,Gfm1,Ndufs7,Pet100,Pet117
73	Leigh Syndrome due to Mitochondrial Complex V Deficiency	DisGeNET	0.0352464	Bcs1l,Cox10,Cox15,Ndufa1,Ndufa2,Ndufa9,Ndufa10,Ndufs1,Ndufs3,Ndufv1,Ndufs4,Ndufs8,Ndufv2,Pdha1,Sdha,Surf1,Suclg1,Sucla2,Sco2,Lrpprc,Fars2,Ethe1,Uqcrq,Taco1,Ttc19,Ptcd3,Foxred1,Iars2,Ndufa12,Nars2,Gfm2,Gfm1,Ndufs7,Pet100,Pet117
73	Necrotizing encephalopathy, infantile subacute, of Leigh	DisGeNET	0.0352464	Bcs1l,Cox10,Cox15,Ndufa1,Ndufa2,Ndufa9,Ndufa10,Ndufs1,Ndufs3,Ndufv1,Ndufs4,Ndufs8,Ndufv2,Pdha1,Sdha,Surf1,Suclg1,Sucla2,Sco2,Lrpprc,Fars2,Ethe1,Uqcrq,Taco1,Ttc19,Ptcd3,Foxred1,Iars2,Ndufa12,Nars2,Gfm2,Gfm1,Ndufs7,Pet100,Pet117
73	MITOCHONDRIAL COMPLEX III DEFICIENCY (disorder)	DisGeNET	0.040872	Bcs1l,Cyc1,CYTB,Uqcrb,Uqcrc2,Uqcrq,Ttc19,Uqcc2,Lyrm7
73	Optic Atrophy	DisGeNET	0.040872	Aco2,Agxt,Auh,Bcl2,Bcs1l,Comt,Cox6b1,Cox8a,Cox10,Cox15,Decr1,Timm8a1,Dguok,Sardh,Dmpk,Echs1,Fdxr,Fh1,Fxn,Hsd17b10,Idh3a,Idh3b,Letm1,Mipep,ATP6,COX1,COX2,COX3,CYTB,ND1,ND2,ND3,ND4,ND4L,ND5,ND6,Ndufa2,Ndufa4,Ndufa9,Ndufa10,Ndufb8,Ndufs1,Ndufs2,Ndufs3,Ndufv1,Ndufs4,Ndufs8,Ndufv2,Oat,Opa1,Pdha1,Polg,Sco1,Sdha,Sdhd,Spg7,Ssbp1,Surf1,Tk2,Txnrd1,Pdhx,Pex11b,Snap29,Recql4,Mfn2,Sco2,Dnm1l,Tsfm,Wars2,Micu1,…
73	Diabetic Cardiomyopathies	DisGeNET	0.0420228	Slc25a4,Bad,Bcl2,Casp3,Casp8,Casp9,Decr1,Maoa,Opa1,Phb,Vdac1,Lonp1,Micu1,Sirt3,Poldip2
73	Retinitis Pigmentosa	DisGeNET	0.0420228	Aldh3a2,Arl2,Aldh7a1,Bcl2,Bcs1l,C1qbp,Cox6b1,Cox7b,Cox8a,Cox10,Cox15,Echs1,Fasn,Gykl1,Hadha,Hadhb,Hadh,Hccs,Idh2,Idh3a,Idh3b,ATP6,CYTB,ND1,ND2,ND3,ND4,ND5,ND6,Ndufa2,Ndufa4,Ndufa9,Ndufa10,Ndufs1,Ndufs2,Ndufs3,Ndufv1,Ndufs4,Ndufs8,Ndufv2,Otc,Pdha1,Phyh,Polg,Aldh18a1,Sco1,Sdha,Sdhb,Sdhd,Sod1,Surf1,Tst,Aifm1,Snap29,Fastkd2,Amacr,Poldip2,Trnt1,Taco1,Lipt1,Cycs,Ndufb11,Foxred1,Ndufa12,Ndufaf5,Pank2,Co…
73	LEIGH SYNDROME DUE TO MITOCHONDRIAL COMPLEX I DEFICIENCY	DisGeNET	0.0446123	Bcs1l,Cox10,Cox15,ND2,ND5,ND6,Ndufa1,Ndufa2,Ndufa9,Ndufa10,Ndufs1,Ndufs3,Ndufv1,Ndufs4,Ndufs8,Ndufv2,Pdha1,Sdha,Surf1,Suclg1,Sucla2,Sco2,Lrpprc,Fars2,Ethe1,Uqcrq,Taco1,Ttc19,Ptcd3,Foxred1,Iars2,Ndufa12,Nars2,Gfm2,Gfm1,Ndufaf6,Ndufs7,Pet100,Pet117
73	Mixed anxiety and depressive disorder	DisGeNET	0.0456907	Aldh2,Comt,Maoa,Sod1,Acad8
73	Portal Vein Thrombosis	DisGeNET	0.0456907	Bcs1l,Cox8a,Pcx,Akap1,Acad8
73	Hypoglycemia	DisGeNET	0.0463748	Acadl,Acadm,Acadsb,Acadvl,Acat1,Auh,Bckdha,Bckdhb,Bcs1l,Bid,Car5a,Slc25a20,Cpt1a,Cpt2,Dbt,Timm8a1,Dguok,Dld,Etfa,Etfb,Etfdh,Gcdh,Gykl1,Glud1,Gsr,Hsd17b10,Hadha,Hadh,Hmgcl,Hmgcs2,Mpv17,ND1,ND2,ND3,Ndufa1,Ndufa6,Ndufb3,Ndufb9,Ndufb10,Ndufs1,Ndufs2,Ndufs3,Ndufv1,Ndufs4,Ndufs8,Ndufv2,Otc,Pcx,Pcca,Pccb,Pck2,Sod2,Star,Tfam,Ucp2,Uqcrb,Uqcrc2,Suclg1,Prepl,Dnm1l,Lrpprc,Wars2,Mlycd,Mto1,Ndufaf3,Uqcrq,Gls2,…
73	Parkinson Disease	DisGeNET	0.0467796	Acaca,Aco2,Aldh2,Apex1,Bax,Bcl2,Bcl2l1,Tspo,Casp3,Casp8,Casp9,Cat,Comt,Cox8a,Cox10,Cpox,Crat,Cry1,Cryz,Cyc1,Cyp27b1,Dbi,Decr1,Timm8a1,Dld,Dmpk,Ehhadh,Endog,Ephx2,Fasn,Fdxr,Fxn,Fth1,Gls,Glud1,Gpx1,Gsr,Hsd17b10,Hspa9,Hspd1,Maoa,Maob,Mcl1,Msra,COX2,CYTB,ND1,ND2,ND3,ND5,Mtx1,Ndufa1,Ndufa2,Ndufs3,Ndufs4,Ndufv2,Ogdh,Ogg1,Opa1,Pdha1,Phb,Slc25a3,Polb,Polg,Prkaca,Qdpr,Shmt2,Sod1,Sod2,Spg7,Spr,Prdx2,Tfam,T…
76	Bacteremia	DisGeNET	0.0160775	Casp3,Cat,Cs,Hspa9,COX2,Mrps30,Phb2,Glrx5,Mtpap,Chpt1,Mavs
79	Influenza A	DisGeNET	0.027929	Bcl2,Bcl2l2,Tspo,C1qbp,Casp3,Cat,Sardh,Ivd,COX2,Phb,Sod1,Poldip2,Hebp1,Sars2,Sphk2,Mavs,Golph3,Nlrx1,Pgam5
79	Aplasia Cutis Congenita	DisGeNET	0.0393025	Acaca,Acacb,Acadvl,Bcl2,Bnip3,Casp3,Cox7b,Cyp11b2,Decr1,Timm8a1,Sardh,Hsd17b4,Hspa9,Hspd1,COX2,Prkaca,Sdhb,Star,Lonp1,Glyat,Acot7,Bbc3,Diablo,Pink1
79	Nonsyndromic Deafness	DisGeNET	0.0420228	Timm8a1,COX1,Hars2,Diablo,Nars2,Pnpt1,Msrb3
79	Prolactinoma	DisGeNET	0.0420228	Sdha,Sdhb,Lrpprc,Eral1,Macrod1,Qtrt1,Pgam5
80	Respiratory Distress Syndrome, Adult	DisGeNET	0.0393025	Acaca,Aco2,Tspo,Ephx2,Hadha,Mcl1,Sod2,Tst,Txnrd1,Slc25a11,Prdx6,Acaa2,Polg2,Sirt3,Poldip2,Sars2,Mfn1,Chpt1,Pank2
81	Malar flattening	DisGeNET	0.0186329	Comt,Dhodh,Pycr1,Lrpprc,Pycr2
81	Prolactinoma	DisGeNET	0.0255448	Sdha,Sdhb,Lrpprc,Eral1,Macrod1,Qtrt1,Pgam5
81	Vesico-Ureteral Reflux	DisGeNET	0.0255448	Comt,Sdha,Sdhb,Sdhd,Recql4,Pycr2,Sdhaf1
81	Urticaria	DisGeNET	0.0382311	Agxt,Aldh3a2,Cat,Gpx1,Sdhb,Sdhc,Sod1,Sod2,Lrpprc,Gstk1
82	Hypertrichosis	DisGeNET	0.0144196	Acaca,Bcs1l,Cox10,Cox15,Cpox,Echs1,Ndufa2,Ndufa4,Ndufa9,Ndufa10,Ndufb8,Ndufs1,Ndufs2,Ndufs3,Ndufv1,Ndufs4,Ndufs8,Ndufv2,Pdha1,Sdha,Surf1,Sco2,Ndufaf3,Slc25a24,Taco1,Lipt1,Foxred1,Ndufa12,Ndufaf5,Ndufaf2,Sfxn1,Mtfmt,Ndufaf6,Ndufs7,Pet100
82	Nicotinamide adenine dinucleotide coenzyme Q reductase deficiency	DisGeNET	0.0227571	Slc25a10,ND1,ND3,ND5,ND6,Ndufa1,Ndufa2,Ndufa9,Ndufa10,Ndufb3,Ndufb6,Ndufb8,Ndufb9,Ndufb10,Ndufs1,Ndufs2,Ndufs3,Ndufv1,Ndufs4,Ndufs8,Ndufv2,Polg,Sod2,Slc25a27,Pdss1,Mto1,Ndufaf3,Acad9,Ndufaf4,Ndufaf1,Ndufb11,Foxred1,Tmem126b,Ndufa12,Rars2,Elac2,Nubpl,Ndufaf2,Ndufaf6,Ndufs7
82	Renal Cell Dysplasia	DisGeNET	0.0244595	Ndufb8,Ndufs2,Surf1,Sco2,Coq7,Ndufaf3,Rmnd1,Qrsl1,Slc25a22
82	Renal dysplasia	DisGeNET	0.0244595	Ndufb8,Ndufs2,Surf1,Sco2,Coq7,Ndufaf3,Rmnd1,Qrsl1,Slc25a22
82	Schistosomiasis	DisGeNET	0.0420228	Bcl2,Cox8a,Dhodh,Got2,Hspd1,Ndufb2,Pcx,Sod1,Mrpl28,Phb2,Sfxn1,Gstk1
82	alpha 1-Antitrypsin Deficiency	DisGeNET	0.0431044	Acadvl,Cat,Hadha,Sco2,Acad8,Sfxn1
82	Progressive cerebellar ataxia	DisGeNET	0.0482398	Auh,Cox15,Echs1,Fxn,Gls,Ndufa2,Ndufa4,Ndufa9,Ndufa10,Ndufs1,Ndufs2,Ndufs3,Ndufv1,Ndufs4,Ndufs8,Ndufv2,Pdha1,Polg,Sdha,Surf1,Aifm1,Slc25a15,Pitrm1,Afg3l2,Pmpca,Coq2,Taco1,Lipt1,Mtpap,Dars2,Foxred1,Ndufa12,Ndufaf5,Ndufaf2,Mgme1,Mars2,Mtfmt,Ndufaf6,Ndufs7,Chchd10,Pet100
83	MITOCHONDRIAL COMPLEX I DEFICIENCY	DisGeNET	0.0104719	Slc25a10,ND1,ND2,ND3,ND4,Ndufa1,Ndufa6,Ndufb3,Ndufb8,Ndufb9,Ndufb10,Ndufs1,Ndufs2,Ndufs3,Ndufv1,Ndufs4,Ndufs8,Ndufv2,Aifm1,Sirt3,Ndufaf3,Ndufaf4,Ndufaf1,Timmdc1,Gdap1,Ndufb11,Foxred1,Tmem126b,Elac2,Ndufaf5,Nubpl,Ndufaf2,Ndufaf6,Ndufs7
83	Nicotinamide adenine dinucleotide coenzyme Q reductase deficiency	DisGeNET	0.0160775	Slc25a10,ND1,ND3,ND5,ND6,Ndufa1,Ndufa2,Ndufa9,Ndufa10,Ndufb3,Ndufb6,Ndufb8,Ndufb9,Ndufb10,Ndufs1,Ndufs2,Ndufs3,Ndufv1,Ndufs4,Ndufs8,Ndufv2,Polg,Sod2,Slc25a27,Pdss1,Mto1,Ndufaf3,Acad9,Ndufaf4,Ndufaf1,Ndufb11,Foxred1,Tmem126b,Ndufa12,Rars2,Elac2,Nubpl,Ndufaf2,Ndufaf6,Ndufs7
83	Fetal Distress	DisGeNET	0.0186329	Aldh7a1,ND1,ND2,ND3,Ndufa1,Ndufa6,Ndufb3,Ndufb9,Ndufb10,Ndufs1,Ndufs2,Ndufs3,Ndufv1,Ndufs4,Ndufs8,Ndufv2,Ndufaf3,Ndufaf4,Ndufaf1,Timmdc1,Ndufb11,Foxred1,Tmem126b,Ndufaf5,Nubpl,Ndufaf2,Ndufs7
83	Abnormal mitochondria in muscle tissue	DisGeNET	0.0232287	ND1,ND2,ND3,Ndufa1,Ndufa6,Ndufb3,Ndufb9,Ndufb10,Ndufs1,Ndufs2,Ndufs3,Ndufv1,Ndufs4,Ndufs8,Ndufv2,Sdha,Sdhd,Afg3l2,Ndufaf3,Ndufaf4,Ndufaf1,Timmdc1,Ndufb11,Foxred1,Tmem126b,Ndufaf5,Nubpl,Ndufaf2,Ndufs7,Sdhaf1
83	Hypertrichosis	DisGeNET	0.0340372	Acaca,Bcs1l,Cox10,Cox15,Cpox,Echs1,Ndufa2,Ndufa4,Ndufa9,Ndufa10,Ndufb8,Ndufs1,Ndufs2,Ndufs3,Ndufv1,Ndufs4,Ndufs8,Ndufv2,Pdha1,Sdha,Surf1,Sco2,Ndufaf3,Slc25a24,Taco1,Lipt1,Foxred1,Ndufa12,Ndufaf5,Ndufaf2,Sfxn1,Mtfmt,Ndufaf6,Ndufs7,Pet100
83	Schistosomiasis	DisGeNET	0.0446123	Bcl2,Cox8a,Dhodh,Got2,Hspd1,Ndufb2,Pcx,Sod1,Mrpl28,Phb2,Sfxn1,Gstk1
85	Influenza A	DisGeNET	0.0239777	Bcl2,Bcl2l2,Tspo,C1qbp,Casp3,Cat,Sardh,Ivd,COX2,Phb,Sod1,Poldip2,Hebp1,Sars2,Sphk2,Mavs,Golph3,Nlrx1,Pgam5
85	Prolactinoma	DisGeNET	0.040872	Sdha,Sdhb,Lrpprc,Eral1,Macrod1,Qtrt1,Pgam5
86	Hypertrichosis	DisGeNET	0.024861	Acaca,Bcs1l,Cox10,Cox15,Cpox,Echs1,Ndufa2,Ndufa4,Ndufa9,Ndufa10,Ndufb8,Ndufs1,Ndufs2,Ndufs3,Ndufv1,Ndufs4,Ndufs8,Ndufv2,Pdha1,Sdha,Surf1,Sco2,Ndufaf3,Slc25a24,Taco1,Lipt1,Foxred1,Ndufa12,Ndufaf5,Ndufaf2,Sfxn1,Mtfmt,Ndufaf6,Ndufs7,Pet100
86	Mood swings	DisGeNET	0.0289107	Bcs1l,Cox10,Cox15,Sardh,Echs1,Maoa,Ndufa2,Ndufa4,Ndufa9,Ndufa10,Ndufs1,Ndufs2,Ndufs3,Ndufv1,Ndufs4,Ndufs8,Ndufv2,Pdha1,Polg,Prkaca,Sdha,Sod1,Surf1,Taco1,Lipt1,Mtpap,Foxred1,Ndufa12,Ndufaf5,Pank2,Ndufaf2,Mtfmt,Ndufaf6,Nags,Ndufs7,Chchd10,Pet100
86	Nicotinamide adenine dinucleotide coenzyme Q reductase deficiency	DisGeNET	0.0352464	Slc25a10,ND1,ND3,ND5,ND6,Ndufa1,Ndufa2,Ndufa9,Ndufa10,Ndufb3,Ndufb6,Ndufb8,Ndufb9,Ndufb10,Ndufs1,Ndufs2,Ndufs3,Ndufv1,Ndufs4,Ndufs8,Ndufv2,Polg,Sod2,Slc25a27,Pdss1,Mto1,Ndufaf3,Acad9,Ndufaf4,Ndufaf1,Ndufb11,Foxred1,Tmem126b,Ndufa12,Rars2,Elac2,Nubpl,Ndufaf2,Ndufaf6,Ndufs7
86	Progressive cerebellar ataxia	DisGeNET	0.0371655	Auh,Cox15,Echs1,Fxn,Gls,Ndufa2,Ndufa4,Ndufa9,Ndufa10,Ndufs1,Ndufs2,Ndufs3,Ndufv1,Ndufs4,Ndufs8,Ndufv2,Pdha1,Polg,Sdha,Surf1,Aifm1,Slc25a15,Pitrm1,Afg3l2,Pmpca,Coq2,Taco1,Lipt1,Mtpap,Dars2,Foxred1,Ndufa12,Ndufaf5,Ndufaf2,Mgme1,Mars2,Mtfmt,Ndufaf6,Ndufs7,Chchd10,Pet100
86	Severe intellectual disability	DisGeNET	0.0467796	Acat1,Aco2,Bcs1l,Cox15,Dbt,Dmpk,Echs1,Hmgcl,Letm1,Maoa,ATP6,Ndufa2,Ndufa4,Ndufa9,Ndufa10,Ndufs1,Ndufs2,Ndufs3,Ndufv1,Ndufs4,Ndufs8,Ndufv2,Pdha1,Phyh,Pycr1,Sdha,Surf1,Aldh5a1,Suclg1,Snap29,Wars2,Uqcrq,Pycr2,Taco1,Lipt1,Nsun2,Tmem70,Foxred1,Ndufa12,Ndufaf5,L2hgdh,Ndufaf2,Timm50,Mtfmt,Ndufaf6,Iba57,Ndufs7,Pet100
89	Gastric Adenocarcinoma	DisGeNET	0.011943	Apex1,Bcl2,Stom,Fasn,Gls,Letm1,Mcl1,COX2,Sdha,Dnm1l,Stoml2,Gstk1
89	EAR, PATELLA, SHORT STATURE SYNDROME	DisGeNET	0.0227571	Comt,Fasn,Maob,Sod1
89	Elastosis perforans serpiginosa	DisGeNET	0.0227571	Comt,Fasn,Maob,Sod1
89	Phyllodes Tumor	DisGeNET	0.0227571	Fasn,Fhit,Sdha,Sdhb
89	Congenital diaphragmatic hernia	DisGeNET	0.0435411	Cox7b,Gfer,Hccs,Letm1,Sdha,Ndufb11,Chdh,Gstk1
89	Profound Mental Retardation	DisGeNET	0.0435411	Fasn,Letm1,Surf1,Aldh5a1,Pdhx,Trmt1,L2hgdh,Coq5
89	Mental deficiency	DisGeNET	0.0483502	Timm8a1,Fasn,Letm1,Surf1,Aldh5a1,Pdhx,Trmt1,L2hgdh,Coq5
90	Complex partial seizures	DisGeNET	0.0160775	Abat,Acat1,Apex1,Bcl2,Cat,Cyp11a1,Idh2,Letm1,Polg,Sod2,Pnpla8,Acsf3
90	Generalized seizures	DisGeNET	0.018203	Abat,Acat1,Apex1,Cat,Cyp11a1,Idh2,Letm1,Polg,Sod2,Tk2,Wars2,Mcat,Nsun2
90	CODAS syndrome	DisGeNET	0.0262485	Hspa9,Clpp,Aifm1,Lonp1
90	Clumsiness - motor delay	DisGeNET	0.0368331	Acadsb,Acat1,Auh,Cat,Cox6b1,Cox8a,Cox10,Crat,Cyp27b1,Sardh,Hadha,Hadhb,Hadh,Letm1,Opa1,Pdk3,Aldh18a1,Sco1,Sdha,Sdhb,Sdhd,Spr,Tk2,Aldh5a1,Lonp1,Prepl,Sco2,Coq7,Wars2,Micu1,Lias,Fastkd2,Hibch,Coq2,Taco1,Gdap1,Nsun2,Mtpap,Dars2,Iars2,Agk,Nif3l1,Cox14,Gfm1,Cox20,Sdhaf1,Pet100
90	Ketosis	DisGeNET	0.0452312	Acaa1a,Acadm,Acat1,Aldh2,Slc25a4,Bckdha,Bckdhb,Car5a,Cpt1a,Cpt2,Cyc1,Dbt,Gykl1,Hadhb,Ivd,Oxct1,Polg,Acaa2,Polg2,Mlycd,Mcat,Chpt1,Mccc2,Mmaa,Acsf3,Mmab
91	Nystagmus	DisGeNET	0.0347691	Abcb7,Aco2,Slc25a4,Bcs1l,Slc25a20,Cox8a,Cox10,Cox15,Dguok,Dlat,Echs1,Fdxr,Fxn,Hsd17b10,Hsd17b4,Hspd1,Idh3a,Idh3b,Letm1,Mpv17,ATP6,ND1,ND2,ND3,ND4,ND5,ND6,Ndufa1,Ndufa2,Ndufa4,Ndufa6,Ndufa9,Ndufa10,Ndufb3,Ndufb8,Ndufb9,Ndufb10,Ndufs1,Ndufs2,Ndufs3,Ndufv1,Ndufs4,Ndufs8,Ndufv2,Opa1,Pdha1,Phyh,Polg,Sdha,Sdhb,Sdhd,Spg7,Surf1,Tufm,Pex11b,Lonp1,Recql4,Sco2,Dnm1l,Wars2,Afg3l2,Rpia,Pmpca,Prdx5,Ndufaf3,Par…
91	Conductive hearing loss	DisGeNET	0.0467796	Comt,Dhodh,Dlst,Fh1,Idh3a,Idh3b,Mdh2,Sdha,Sdhb,Sdhc,Sdhd,Slc25a11,Lonp1,Recql4,Slc25a24,Sdhaf2
91	Congenital Epicanthus	DisGeNET	0.0467796	Comt,Hsd17b4,Letm1,Aldh6a1,Pdhx,Pex11b,Lonp1,Recql4,Prepl,Dhx30,Amacr,Fbxl4,Hibch,Slc25a24,Nsun2,Uqcc2
92	Phyllodes Tumor	DisGeNET	0.00434747	Fasn,Fhit,Sdha,Sdhb
92	Gastric Adenocarcinoma	DisGeNET	0.00535843	Apex1,Bcl2,Stom,Fasn,Gls,Letm1,Mcl1,COX2,Sdha,Dnm1l,Stoml2,Gstk1
92	Neonatal Hypotonia	DisGeNET	0.00717327	Abat,Cpt2,Dlat,Gls,Hadh,Hsd17b4,Letm1,Sdha,Sdhd,Tufm,Pdhx,Prepl,Sco2,Tsfm,Mrps16,Coq4,Pdss2,Lyrm4,Slc25a22,Clpb,Uqcc2,Timm50,Ears2,Glyctk,Nadk2,Sdhaf1
92	hereditary paraganglioma	DisGeNET	0.012777	Sardh,Sdha,Sdhb,Sdhc,Sdhd,Lonp1,Sdhaf2
92	Prostatic Intraepithelial Neoplasias	DisGeNET	0.0160775	Bcl2,Tspo,Fasn,COX2,Lonp1,Trap1,Amacr,Elac2
92	Dwarfism	DisGeNET	0.024861	Aldh3a2,Bcl2,Casp8,Comt,Cox4i1,Cox7b,Cyp11b2,Cyp27b1,Dna2,Ehhadh,Gykl1,Glud1,Hccs,Hsd17b4,Hspa9,Idh2,Letm1,Mcl1,Mpv17,ATP6,COX1,COX2,COX3,ND1,ND4,ND5,ND6,Ogdh,Pcca,Pccb,Prkaca,Pycr1,Aldh18a1,Sdha,Sdhb,Sdhc,Sdhd,Sod1,Top3a,Pex11b,Sucla2,Snap29,Lonp1,Recql4,Prepl,Abcb6,Aass,Yme1l1,Pmpca,Mlycd,Pars2,Coa3,Pycr2,Slc25a24,Pam16,Ptrh2,Ndufb11,Nsun2,Qrsl1,Iars2,Mrps22,Fkbp10,Coasy,Atpaf2,Mars2,Nat8l,Chch…
92	Clumsiness - motor delay	DisGeNET	0.0294063	Acadsb,Acat1,Auh,Cat,Cox6b1,Cox8a,Cox10,Crat,Cyp27b1,Sardh,Hadha,Hadhb,Hadh,Letm1,Opa1,Pdk3,Aldh18a1,Sco1,Sdha,Sdhb,Sdhd,Spr,Tk2,Aldh5a1,Lonp1,Prepl,Sco2,Coq7,Wars2,Micu1,Lias,Fastkd2,Hibch,Coq2,Taco1,Gdap1,Nsun2,Mtpap,Dars2,Iars2,Agk,Nif3l1,Cox14,Gfm1,Cox20,Sdhaf1,Pet100
92	Gastrointestinal Stromal Sarcoma	DisGeNET	0.0295082	Sdha,Sdhb,Sdhc
92	Neoplasm of small intestine	DisGeNET	0.0295082	Sdha,Sdhb,Sdhc
92	Pheochromocytoma, malignant	DisGeNET	0.0295082	Maob,Pdk1,Sdhb
92	Pulmonary chondroma	DisGeNET	0.0295082	Sdha,Sdhb,Sdhc
92	Pheochromocytoma, Extra-Adrenal	DisGeNET	0.0348341	Comt,Dlst,Sardh,Fh1,Maoa,Maob,Mdh2,Sdha,Sdhb,Sdhc,Sdhd,Slc25a11,Sdhaf2
92	EAR, PATELLA, SHORT STATURE SYNDROME	DisGeNET	0.040872	Comt,Fasn,Maob,Sod1
92	Elastosis perforans serpiginosa	DisGeNET	0.040872	Comt,Fasn,Maob,Sod1
92	Malignant Paraganglionic Neoplasm	DisGeNET	0.040872	Sardh,Sdha,Sdhb,Sdhd
92	Noncompaction cardiomyopathy	DisGeNET	0.040872	Sdha,Sdhb,Sdhd,Sdhaf1
92	Stress/infection-induced lactic acidosis	DisGeNET	0.040872	Sdha,Sdhd,Nadk2,Sdhaf1
92	Malignant neoplasm of kidney	DisGeNET	0.0420228	Aco2,Aldh9a1,Bcl2,Casp3,Casp8,Comt,Cryz,Cyp11b2,Cyp11b1,Timm8a1,Sardh,Fasn,Fh1,Fhit,Gls,Gpx1,Hspd1,COX2,Ogg1,Pdk1,Slc25a3,Prodh,Pycr1,Sdhb,Sdhd,Sod2,Pdhx,Abcb6,Trap1,Sirt3,Amacr,Prdx5,Mul1
92	Obesity	DisGeNET	0.0420228	Acaca,Acacb,Acadm,Acadvl,Acly,Aldh2,Arg2,Bad,Bcat2,Bcl2,Bcs1l,Bid,Bnip3,Tspo,C1qbp,Car5a,Casp3,Casp8,Cat,Comt,Cox4i1,Cox8a,Cps1,Cpt1a,Cpt1b,Cpt2,Cry1,Cs,Cyp11a1,Cyp24a1,Cyp27a1,Cyp27b1,Dbi,Decr1,Echs1,Etfa,Etfdh,Acsl1,Fasn,Fdps,Fdxr,Gfer,Gykl1,Gldc,Got2,Gpx1,Gsr,Hadha,Hadh,Hspd1,Idh3a,Idh3b,Letm1,Nbr1,Maoa,Maob,Mcl1,Aldh6a1,Msra,ATP6,COX2,CYTB,ND1,Ndufb6,Ogg1,Otc,Oxct1,Pcx,Pck2,Pdk1,Pdk2,Pdk4,Phb…
92	Conductive hearing loss	DisGeNET	0.0426435	Comt,Dhodh,Dlst,Fh1,Idh3a,Idh3b,Mdh2,Sdha,Sdhb,Sdhc,Sdhd,Slc25a11,Lonp1,Recql4,Slc25a24,Sdhaf2
92	Congenital Epicanthus	DisGeNET	0.0426435	Comt,Hsd17b4,Letm1,Aldh6a1,Pdhx,Pex11b,Lonp1,Recql4,Prepl,Dhx30,Amacr,Fbxl4,Hibch,Slc25a24,Nsun2,Uqcc2
92	Paraganglioma	DisGeNET	0.0463266	Acaca,Bcl2,Dlst,Sardh,Fh1,Idh2,Mdh2,Sdha,Sdhb,Sdhc,Sdhd,Slc25a11,Sco2,Trap1,Iscu,Pdp1,Sdhaf2
92	Carney Triad	DisGeNET	0.0477965	Sardh,Sdha,Sdhb,Sdhc,Sdhd
92	High-Grade Prostatic Intraepithelial Neoplasia	DisGeNET	0.0477965	Bcl2,Fasn,Mutyh,Lonp1,Amacr
92	Long narrow head	DisGeNET	0.0477965	Hsd17b4,Letm1,Pex11b,Snap29,Prepl
92	Mitochondrial Complex II Deficiency	DisGeNET	0.0477965	Sardh,Sdha,Sdhb,Sdhd,Sdhaf1
94	Pheochromocytoma, Extra-Adrenal	DisGeNET	0.0158408	Comt,Dlst,Sardh,Fh1,Maoa,Maob,Mdh2,Sdha,Sdhb,Sdhc,Sdhd,Slc25a11,Sdhaf2
94	Mood swings	DisGeNET	0.0160775	Bcs1l,Cox10,Cox15,Sardh,Echs1,Maoa,Ndufa2,Ndufa4,Ndufa9,Ndufa10,Ndufs1,Ndufs2,Ndufs3,Ndufv1,Ndufs4,Ndufs8,Ndufv2,Pdha1,Polg,Prkaca,Sdha,Sod1,Surf1,Taco1,Lipt1,Mtpap,Foxred1,Ndufa12,Ndufaf5,Pank2,Ndufaf2,Mtfmt,Ndufaf6,Nags,Ndufs7,Chchd10,Pet100
94	Pheochromocytoma	DisGeNET	0.018203	Acaca,Bcl2,Casp3,Casp8,Cat,Comt,Cs,Dlst,Sardh,Fh1,Idh2,Maoa,Maob,Mdh2,Slc25a3,Sdha,Sdhb,Sdhc,Sdhd,Star,Ucp1,Abcb6,Dnm1l,Pmpca,Sdhaf2
94	Severe intellectual disability	DisGeNET	0.0315764	Acat1,Aco2,Bcs1l,Cox15,Dbt,Dmpk,Echs1,Hmgcl,Letm1,Maoa,ATP6,Ndufa2,Ndufa4,Ndufa9,Ndufa10,Ndufs1,Ndufs2,Ndufs3,Ndufv1,Ndufs4,Ndufs8,Ndufv2,Pdha1,Phyh,Pycr1,Sdha,Surf1,Aldh5a1,Suclg1,Snap29,Wars2,Uqcrq,Pycr2,Taco1,Lipt1,Nsun2,Tmem70,Foxred1,Ndufa12,Ndufaf5,L2hgdh,Ndufaf2,Timm50,Mtfmt,Ndufaf6,Iba57,Ndufs7,Pet100
94	Hypertrichosis	DisGeNET	0.0388454	Acaca,Bcs1l,Cox10,Cox15,Cpox,Echs1,Ndufa2,Ndufa4,Ndufa9,Ndufa10,Ndufb8,Ndufs1,Ndufs2,Ndufs3,Ndufv1,Ndufs4,Ndufs8,Ndufv2,Pdha1,Sdha,Surf1,Sco2,Ndufaf3,Slc25a24,Taco1,Lipt1,Foxred1,Ndufa12,Ndufaf5,Ndufaf2,Sfxn1,Mtfmt,Ndufaf6,Ndufs7,Pet100
94	Fulminant Hepatic Failure with Cerebral Edema	DisGeNET	0.0420228	Tspo,Maoa,Maob
94	Gastrointestinal Stromal Sarcoma	DisGeNET	0.0420228	Sdha,Sdhb,Sdhc
94	Hepatic Coma	DisGeNET	0.0420228	Tspo,Maoa,Maob
94	Hepatic Stupor	DisGeNET	0.0420228	Tspo,Maoa,Maob
94	Neoplasm of small intestine	DisGeNET	0.0420228	Sdha,Sdhb,Sdhc
94	Oppositional Defiant Disorder	DisGeNET	0.0420228	Comt,Maoa,Maob
94	Paranoid Schizophrenia	DisGeNET	0.0420228	Comt,Maoa,Maob
94	Pheochromocytoma, malignant	DisGeNET	0.0420228	Maob,Pdk1,Sdhb
94	Pulmonary chondroma	DisGeNET	0.0420228	Sdha,Sdhb,Sdhc
94	Central neuroblastoma	DisGeNET	0.0470448	Acadm,Acat1,Arg2,Bad,Bak1,Bax,Bcl2,Bcl2l2,Bcs1l,Bik,Bnip3,Tspo,C1qbp,Casp3,Casp8,Casp9,Cat,Comt,Cox8a,Cryz,Decr1,Dld,Endog,Etfa,Fdxr,Fh1,Fhit,Fxn,Fth1,Gldc,Gls,Gpx1,Gsr,Gstz1,Hspa9,Hspd1,Hspe1,Ldhb,Lig3,Maoa,Maob,Mcl1,Mgst1,Mpst,Msra,COX2,Ndufv2,Nme3,Nme4,Ogdh,Oxa1l,Pdk1,Phb,Sdha,Sdhb,Sdhc,Sdhd,Shmt2,Sod1,Sod2,Spg7,Spr,Ssbp1,Prdx2,Txnrd1,Ucp2,Ucp3,Uqcrfs1,Vdac1,Sucla2,Slc25a27,Mfn2,Sco2,Bcl2l11,A…
94	Childhood Neuroblastoma	DisGeNET	0.0470448	Acadm,Acat1,Arg2,Bad,Bak1,Bax,Bcl2,Bcl2l2,Bcs1l,Bik,Bnip3,Tspo,C1qbp,Casp3,Casp8,Casp9,Cat,Comt,Cox8a,Cryz,Decr1,Dld,Endog,Etfa,Fdxr,Fh1,Fhit,Fxn,Fth1,Gldc,Gls,Gpx1,Gsr,Gstz1,Hspa9,Hspd1,Hspe1,Ldhb,Lig3,Maoa,Maob,Mcl1,Mgst1,Mpst,Msra,COX2,Ndufv2,Nme3,Nme4,Ogdh,Oxa1l,Pdk1,Phb,Sdha,Sdhb,Sdhc,Sdhd,Shmt2,Sod1,Sod2,Spg7,Spr,Ssbp1,Prdx2,Txnrd1,Ucp2,Ucp3,Uqcrfs1,Vdac1,Sucla2,Slc25a27,Mfn2,Sco2,Bcl2l11,A…
94	Fibromyalgia	DisGeNET	0.048726	Tspo,Cat,Comt,Gpx1,Gsr,Maoa,Maob,CYTB,Sod1,Mfn2,Abcb6,Golph3
94	Vocal Cord Paralysis	DisGeNET	0.048726	Dlst,Fh1,Mdh2,Sdha,Sdhb,Sdhc,Sdhd,Sod1,Slc25a11,Mfn2,Gdap1,Sdhaf2
95	Myasthenias	DisGeNET	0.00911643	Acadl,Prepl,Acad9
95	Global developmental delay	DisGeNET	0.0144196	Abat,Abcb7,Acadm,Acads,Acadsb,Aco2,Abcd1,Nudt2,Aldh7a1,Auh,Bcs1l,Slc25a20,Cat,Comt,Cox6b1,Cox7b,Cox8a,Cox10,Cox15,Cps1,Cyp27a1,Dlat,Dld,Sardh,Dna2,Echs1,Fh1,Gatm,Gcdh,Gfer,Gykl1,Gls,Glud1,Got2,Gpd2,Hsd17b10,Hadha,Hadhb,Hccs,Hsd17b4,Hspd1,Idh2,Ivd,Letm1,Maoa,Maob,Mdh2,Mipep,Aldh6a1,Mpv17,ATP6,COX2,ND1,ND2,ND3,Ndufa1,Ndufa2,Ndufa4,Ndufa6,Ndufa9,Ndufa10,Ndufb3,Ndufb8,Ndufb9,Ndufb10,Ndufs1,Ndufs2,Ndu…
95	Phyllodes Tumor	DisGeNET	0.0177311	Fasn,Fhit,Sdha,Sdhb
95	Hypertrophic Cardiomyopathy	DisGeNET	0.0407797	Acaca,Acadl,Acadvl,Slc25a4,Bcl2,Bcs1l,Casp3,Cox6b1,Cox7b,Cox8a,Cox10,Cox15,Cpt1a,Cyp11b1,Dld,Sardh,Dmpk,Echs1,Fasn,Fxn,Hsd17b10,Hadha,Hadh,Hccs,Hspd1,Idh2,Mipep,ATP6,COX1,COX2,COX3,CYTB,ND1,ND2,ND3,ND4,ND5,ND6,Ndufa1,Ndufa2,Ndufa4,Ndufa6,Ndufa9,Ndufa10,Ndufb3,Ndufb8,Ndufb9,Ndufb10,Ndufs1,Ndufs2,Ndufs3,Ndufv1,Ndufs4,Ndufs8,Ndufv2,Opa1,Pdha1,Slc25a3,Sco1,Sdha,Sdhb,Sdhd,Star,Surf1,Suclg1,Sco2,Htatip…
95	Clumsiness - motor delay	DisGeNET	0.0446123	Acadsb,Acat1,Auh,Cat,Cox6b1,Cox8a,Cox10,Crat,Cyp27b1,Sardh,Hadha,Hadhb,Hadh,Letm1,Opa1,Pdk3,Aldh18a1,Sco1,Sdha,Sdhb,Sdhd,Spr,Tk2,Aldh5a1,Lonp1,Prepl,Sco2,Coq7,Wars2,Micu1,Lias,Fastkd2,Hibch,Coq2,Taco1,Gdap1,Nsun2,Mtpap,Dars2,Iars2,Agk,Nif3l1,Cox14,Gfm1,Cox20,Sdhaf1,Pet100
95	Hypertrichosis	DisGeNET	0.0447187	Acaca,Bcs1l,Cox10,Cox15,Cpox,Echs1,Ndufa2,Ndufa4,Ndufa9,Ndufa10,Ndufb8,Ndufs1,Ndufs2,Ndufs3,Ndufv1,Ndufs4,Ndufs8,Ndufv2,Pdha1,Sdha,Surf1,Sco2,Ndufaf3,Slc25a24,Taco1,Lipt1,Foxred1,Ndufa12,Ndufaf5,Ndufaf2,Sfxn1,Mtfmt,Ndufaf6,Ndufs7,Pet100
95	Severe intellectual disability	DisGeNET	0.0470448	Acat1,Aco2,Bcs1l,Cox15,Dbt,Dmpk,Echs1,Hmgcl,Letm1,Maoa,ATP6,Ndufa2,Ndufa4,Ndufa9,Ndufa10,Ndufs1,Ndufs2,Ndufs3,Ndufv1,Ndufs4,Ndufs8,Ndufv2,Pdha1,Phyh,Pycr1,Sdha,Surf1,Aldh5a1,Suclg1,Snap29,Wars2,Uqcrq,Pycr2,Taco1,Lipt1,Nsun2,Tmem70,Foxred1,Ndufa12,Ndufaf5,L2hgdh,Ndufaf2,Timm50,Mtfmt,Ndufaf6,Iba57,Ndufs7,Pet100
96	Adenocarcinoma of pancreas	DisGeNET	0.0397025	Bcl2,Bcl2l1,Cat,Fabp1,Fhit,Got2,Mcl1,COX2,Nthl1,Sdhb,Spg7,Ucp2,Pdhx,Poldip2,Them4
96	Influenza A	DisGeNET	0.0458771	Bcl2,Bcl2l2,Tspo,C1qbp,Casp3,Cat,Sardh,Ivd,COX2,Phb,Sod1,Poldip2,Hebp1,Sars2,Sphk2,Mavs,Golph3,Nlrx1,Pgam5
98	Progressive cerebellar ataxia	DisGeNET	0.000662914	Auh,Cox15,Echs1,Fxn,Gls,Ndufa2,Ndufa4,Ndufa9,Ndufa10,Ndufs1,Ndufs2,Ndufs3,Ndufv1,Ndufs4,Ndufs8,Ndufv2,Pdha1,Polg,Sdha,Surf1,Aifm1,Slc25a15,Pitrm1,Afg3l2,Pmpca,Coq2,Taco1,Lipt1,Mtpap,Dars2,Foxred1,Ndufa12,Ndufaf5,Ndufaf2,Mgme1,Mars2,Mtfmt,Ndufaf6,Ndufs7,Chchd10,Pet100
98	Hypertrichosis	DisGeNET	0.0012526	Acaca,Bcs1l,Cox10,Cox15,Cpox,Echs1,Ndufa2,Ndufa4,Ndufa9,Ndufa10,Ndufb8,Ndufs1,Ndufs2,Ndufs3,Ndufv1,Ndufs4,Ndufs8,Ndufv2,Pdha1,Sdha,Surf1,Sco2,Ndufaf3,Slc25a24,Taco1,Lipt1,Foxred1,Ndufa12,Ndufaf5,Ndufaf2,Sfxn1,Mtfmt,Ndufaf6,Ndufs7,Pet100
98	Mood swings	DisGeNET	0.00191014	Bcs1l,Cox10,Cox15,Sardh,Echs1,Maoa,Ndufa2,Ndufa4,Ndufa9,Ndufa10,Ndufs1,Ndufs2,Ndufs3,Ndufv1,Ndufs4,Ndufs8,Ndufv2,Pdha1,Polg,Prkaca,Sdha,Sod1,Surf1,Taco1,Lipt1,Mtpap,Foxred1,Ndufa12,Ndufaf5,Pank2,Ndufaf2,Mtfmt,Ndufaf6,Nags,Ndufs7,Chchd10,Pet100
98	Severe intellectual disability	DisGeNET	0.00201618	Acat1,Aco2,Bcs1l,Cox15,Dbt,Dmpk,Echs1,Hmgcl,Letm1,Maoa,ATP6,Ndufa2,Ndufa4,Ndufa9,Ndufa10,Ndufs1,Ndufs2,Ndufs3,Ndufv1,Ndufs4,Ndufs8,Ndufv2,Pdha1,Phyh,Pycr1,Sdha,Surf1,Aldh5a1,Suclg1,Snap29,Wars2,Uqcrq,Pycr2,Taco1,Lipt1,Nsun2,Tmem70,Foxred1,Ndufa12,Ndufaf5,L2hgdh,Ndufaf2,Timm50,Mtfmt,Ndufaf6,Iba57,Ndufs7,Pet100
98	Global developmental delay	DisGeNET	0.00276226	Abat,Abcb7,Acadm,Acads,Acadsb,Aco2,Abcd1,Nudt2,Aldh7a1,Auh,Bcs1l,Slc25a20,Cat,Comt,Cox6b1,Cox7b,Cox8a,Cox10,Cox15,Cps1,Cyp27a1,Dlat,Dld,Sardh,Dna2,Echs1,Fh1,Gatm,Gcdh,Gfer,Gykl1,Gls,Glud1,Got2,Gpd2,Hsd17b10,Hadha,Hadhb,Hccs,Hsd17b4,Hspd1,Idh2,Ivd,Letm1,Maoa,Maob,Mdh2,Mipep,Aldh6a1,Mpv17,ATP6,COX2,ND1,ND2,ND3,Ndufa1,Ndufa2,Ndufa4,Ndufa6,Ndufa9,Ndufa10,Ndufb3,Ndufb8,Ndufb9,Ndufb10,Ndufs1,Ndufs2,Ndu…
98	Leukodystrophy	DisGeNET	0.00540007	Abat,Abcd1,Cox10,Cox15,Cps1,Sardh,Echs1,Hsd17b4,Hspa9,Hspd1,Mpv17,ND1,ND2,ND3,Ndufa1,Ndufa2,Ndufa4,Ndufa6,Ndufa9,Ndufa10,Ndufb3,Ndufb8,Ndufb9,Ndufb10,Ndufs1,Ndufs2,Ndufs3,Ndufv1,Ndufs4,Ndufs8,Ndufv2,Pcx,Pdha1,Sdha,Sdhb,Surf1,Tufm,Aifm1,Sco2,Abcb6,Prdx5,Ndufaf3,Fbxl4,Nfu1,Ndufaf4,Pycr2,Ndufaf1,Taco1,Glrx5,Timmdc1,Lipt1,Ndufb11,Rmnd1,Dars2,Foxred1,Tmem126b,Ndufa12,Aars2,Ndufaf5,Nubpl,Isca1,Pnpt1,Nd…
98	Fetal Distress	DisGeNET	0.00591518	Aldh7a1,ND1,ND2,ND3,Ndufa1,Ndufa6,Ndufb3,Ndufb9,Ndufb10,Ndufs1,Ndufs2,Ndufs3,Ndufv1,Ndufs4,Ndufs8,Ndufv2,Ndufaf3,Ndufaf4,Ndufaf1,Timmdc1,Ndufb11,Foxred1,Tmem126b,Ndufaf5,Nubpl,Ndufaf2,Ndufs7
98	Nicotinamide adenine dinucleotide coenzyme Q reductase deficiency	DisGeNET	0.00896118	Slc25a10,ND1,ND3,ND5,ND6,Ndufa1,Ndufa2,Ndufa9,Ndufa10,Ndufb3,Ndufb6,Ndufb8,Ndufb9,Ndufb10,Ndufs1,Ndufs2,Ndufs3,Ndufv1,Ndufs4,Ndufs8,Ndufv2,Polg,Sod2,Slc25a27,Pdss1,Mto1,Ndufaf3,Acad9,Ndufaf4,Ndufaf1,Ndufb11,Foxred1,Tmem126b,Ndufa12,Rars2,Elac2,Nubpl,Ndufaf2,Ndufaf6,Ndufs7
98	Abnormal mitochondria in muscle tissue	DisGeNET	0.00911643	ND1,ND2,ND3,Ndufa1,Ndufa6,Ndufb3,Ndufb9,Ndufb10,Ndufs1,Ndufs2,Ndufs3,Ndufv1,Ndufs4,Ndufs8,Ndufv2,Sdha,Sdhd,Afg3l2,Ndufaf3,Ndufaf4,Ndufaf1,Timmdc1,Ndufb11,Foxred1,Tmem126b,Ndufaf5,Nubpl,Ndufaf2,Ndufs7,Sdhaf1
98	Strabismus	DisGeNET	0.00911643	Abcb7,Aco2,Slc25a4,Aldh7a1,Bcs1l,Comt,Cox10,Cox15,Dguok,Dhodh,Sardh,Dmpk,Echs1,Gykl1,Hsd17b4,Hspd1,Letm1,Mdh2,ND1,ND2,ND3,Ndufa1,Ndufa2,Ndufa4,Ndufa6,Ndufa9,Ndufa10,Ndufb3,Ndufb9,Ndufb10,Ndufs1,Ndufs2,Ndufs3,Ndufv1,Ndufs4,Ndufs8,Ndufv2,Opa1,Pdha1,Pycr1,Aldh18a1,Sdha,Surf1,Aldh5a1,Pex11b,Sucla2,Lonp1,Recql4,Dnm1l,Lrpprc,Fars2,Yme1l1,Dhx30,Ndufaf3,Hibch,Ndufaf4,Slc25a24,Yars2,Ndufaf1,Taco1,Glrx5,Ti…
98	Nystagmus	DisGeNET	0.0117412	Abcb7,Aco2,Slc25a4,Bcs1l,Slc25a20,Cox8a,Cox10,Cox15,Dguok,Dlat,Echs1,Fdxr,Fxn,Hsd17b10,Hsd17b4,Hspd1,Idh3a,Idh3b,Letm1,Mpv17,ATP6,ND1,ND2,ND3,ND4,ND5,ND6,Ndufa1,Ndufa2,Ndufa4,Ndufa6,Ndufa9,Ndufa10,Ndufb3,Ndufb8,Ndufb9,Ndufb10,Ndufs1,Ndufs2,Ndufs3,Ndufv1,Ndufs4,Ndufs8,Ndufv2,Opa1,Pdha1,Phyh,Polg,Sdha,Sdhb,Sdhd,Spg7,Surf1,Tufm,Pex11b,Lonp1,Recql4,Sco2,Dnm1l,Wars2,Afg3l2,Rpia,Pmpca,Prdx5,Ndufaf3,Par…
98	Hypertrophic Cardiomyopathy	DisGeNET	0.0128255	Acaca,Acadl,Acadvl,Slc25a4,Bcl2,Bcs1l,Casp3,Cox6b1,Cox7b,Cox8a,Cox10,Cox15,Cpt1a,Cyp11b1,Dld,Sardh,Dmpk,Echs1,Fasn,Fxn,Hsd17b10,Hadha,Hadh,Hccs,Hspd1,Idh2,Mipep,ATP6,COX1,COX2,COX3,CYTB,ND1,ND2,ND3,ND4,ND5,ND6,Ndufa1,Ndufa2,Ndufa4,Ndufa6,Ndufa9,Ndufa10,Ndufb3,Ndufb8,Ndufb9,Ndufb10,Ndufs1,Ndufs2,Ndufs3,Ndufv1,Ndufs4,Ndufs8,Ndufv2,Opa1,Pdha1,Slc25a3,Sco1,Sdha,Sdhb,Sdhd,Star,Surf1,Suclg1,Sco2,Htatip…
98	MITOCHONDRIAL COMPLEX I DEFICIENCY	DisGeNET	0.0136495	Slc25a10,ND1,ND2,ND3,ND4,Ndufa1,Ndufa6,Ndufb3,Ndufb8,Ndufb9,Ndufb10,Ndufs1,Ndufs2,Ndufs3,Ndufv1,Ndufs4,Ndufs8,Ndufv2,Aifm1,Sirt3,Ndufaf3,Ndufaf4,Ndufaf1,Timmdc1,Gdap1,Ndufb11,Foxred1,Tmem126b,Elac2,Ndufaf5,Nubpl,Ndufaf2,Ndufaf6,Ndufs7
98	Leigh Disease	DisGeNET	0.0143975	Bcs1l,Cox4i1,Cox8a,Cox10,Cox15,Cpox,Crat,Dld,Echs1,Fxn,ATP6,COX1,COX3,CYTB,ND1,ND2,ND3,ND4,ND5,ND6,Ndufa1,Ndufa2,Ndufa5,Ndufa9,Ndufa10,Ndufs1,Ndufs2,Ndufs3,Ndufv1,Ndufs4,Ndufs8,Ndufv2,Ogdh,Pdha1,Pdhb,Polg,Sdha,Sdhb,Sod2,Surf1,Txnrd1,Pdhx,Suclg1,Sucla2,Cox5a,Sco2,Tsfm,Lrpprc,Fars2,Lias,Ethe1,Mto1,Ndufaf3,Hibch,Uqcrq,Ndufaf4,Coq4,Taco1,Timmdc1,Lipt1,Pdp1,Ttc19,Ptcd3,Parl,Foxred1,Trmu,Iars2,Ndufa12,…
98	Leigh Syndrome Due To Mitochondrial Complex II Deficiency	DisGeNET	0.0147353	Bcs1l,Cox10,Cox15,Ndufa1,Ndufa2,Ndufa9,Ndufa10,Ndufs1,Ndufs3,Ndufv1,Ndufs4,Ndufs8,Ndufv2,Pdha1,Sdha,Surf1,Suclg1,Sucla2,Sco2,Lrpprc,Fars2,Ethe1,Uqcrq,Taco1,Ttc19,Ptcd3,Foxred1,Iars2,Ndufa12,Nars2,Gfm2,Gfm1,Ndufs7,Pet100,Pet117
98	Leigh Syndrome due to Mitochondrial Complex III Deficiency	DisGeNET	0.0147353	Bcs1l,Cox10,Cox15,Ndufa1,Ndufa2,Ndufa9,Ndufa10,Ndufs1,Ndufs3,Ndufv1,Ndufs4,Ndufs8,Ndufv2,Pdha1,Sdha,Surf1,Suclg1,Sucla2,Sco2,Lrpprc,Fars2,Ethe1,Uqcrq,Taco1,Ttc19,Ptcd3,Foxred1,Iars2,Ndufa12,Nars2,Gfm2,Gfm1,Ndufs7,Pet100,Pet117
98	Leigh Syndrome due to Mitochondrial Complex IV Deficiency	DisGeNET	0.0147353	Bcs1l,Cox10,Cox15,Ndufa1,Ndufa2,Ndufa9,Ndufa10,Ndufs1,Ndufs3,Ndufv1,Ndufs4,Ndufs8,Ndufv2,Pdha1,Sdha,Surf1,Suclg1,Sucla2,Sco2,Lrpprc,Fars2,Ethe1,Uqcrq,Taco1,Ttc19,Ptcd3,Foxred1,Iars2,Ndufa12,Nars2,Gfm2,Gfm1,Ndufs7,Pet100,Pet117
98	Leigh Syndrome due to Mitochondrial Complex V Deficiency	DisGeNET	0.0147353	Bcs1l,Cox10,Cox15,Ndufa1,Ndufa2,Ndufa9,Ndufa10,Ndufs1,Ndufs3,Ndufv1,Ndufs4,Ndufs8,Ndufv2,Pdha1,Sdha,Surf1,Suclg1,Sucla2,Sco2,Lrpprc,Fars2,Ethe1,Uqcrq,Taco1,Ttc19,Ptcd3,Foxred1,Iars2,Ndufa12,Nars2,Gfm2,Gfm1,Ndufs7,Pet100,Pet117
98	Necrotizing encephalopathy, infantile subacute, of Leigh	DisGeNET	0.0147353	Bcs1l,Cox10,Cox15,Ndufa1,Ndufa2,Ndufa9,Ndufa10,Ndufs1,Ndufs3,Ndufv1,Ndufs4,Ndufs8,Ndufv2,Pdha1,Sdha,Surf1,Suclg1,Sucla2,Sco2,Lrpprc,Fars2,Ethe1,Uqcrq,Taco1,Ttc19,Ptcd3,Foxred1,Iars2,Ndufa12,Nars2,Gfm2,Gfm1,Ndufs7,Pet100,Pet117
98	LEIGH SYNDROME DUE TO MITOCHONDRIAL COMPLEX I DEFICIENCY	DisGeNET	0.021652	Bcs1l,Cox10,Cox15,ND2,ND5,ND6,Ndufa1,Ndufa2,Ndufa9,Ndufa10,Ndufs1,Ndufs3,Ndufv1,Ndufs4,Ndufs8,Ndufv2,Pdha1,Sdha,Surf1,Suclg1,Sucla2,Sco2,Lrpprc,Fars2,Ethe1,Uqcrq,Taco1,Ttc19,Ptcd3,Foxred1,Iars2,Ndufa12,Nars2,Gfm2,Gfm1,Ndufaf6,Ndufs7,Pet100,Pet117
98	Blepharoptosis	DisGeNET	0.0227571	Slc25a4,Bcs1l,C1qbp,Comt,Cox6b1,Cox8a,Cox10,Cox15,Dguok,Dlat,Dna2,Echs1,Gfer,Letm1,Maoa,Mpv17,COX1,COX2,COX3,ND1,ND2,ND3,ND4,ND5,ND6,Ndufa1,Ndufa2,Ndufa4,Ndufa6,Ndufa9,Ndufa10,Ndufb3,Ndufb9,Ndufb10,Ndufs1,Ndufs2,Ndufs3,Ndufv1,Ndufs4,Ndufs8,Ndufv2,Opa1,Pdha1,Phyh,Polg,Sco1,Sdha,Sdhd,Spr,Surf1,Tk2,Top3a,Pex11b,Sucla2,Lonp1,Prepl,Sco2,Dnm1l,Micu1,Slc30a9,Fars2,Afg3l2,Polg2,Fastkd2,Ndufaf3,Pars2,Coq2…
98	Ptosis	DisGeNET	0.0227571	Slc25a4,Bcl2,Bcs1l,C1qbp,Comt,Cox6b1,Cox8a,Cox10,Cox15,Dguok,Dlat,Dna2,Echs1,Gfer,Letm1,Maoa,COX1,COX2,COX3,ND1,ND2,ND3,ND4,ND5,ND6,Ndufa1,Ndufa2,Ndufa4,Ndufa6,Ndufa9,Ndufa10,Ndufb3,Ndufb9,Ndufb10,Ndufs1,Ndufs2,Ndufs3,Ndufv1,Ndufs4,Ndufs8,Ndufv2,Opa1,Pdha1,Phyh,Polg,Sco1,Sdha,Sdhd,Spr,Surf1,Tk2,Top3a,Pex11b,Sucla2,Lonp1,Prepl,Sco2,Dnm1l,Micu1,Slc30a9,Fars2,Afg3l2,Polg2,Fastkd2,Ndufaf3,Pars2,Coq2,…
98	Dysarthria	DisGeNET	0.0228902	Abcb7,Aldh3a2,Slc25a4,Auh,Bcs1l,Cox10,Cox15,Timm8a1,Echs1,Fxn,Hsd17b10,Hmgcl,ATP6,COX1,COX2,COX3,ND1,ND4,ND5,ND6,Ndufa2,Ndufa4,Ndufa9,Ndufa10,Ndufs1,Ndufs2,Ndufs3,Ndufv1,Ndufs4,Ndufs8,Ndufv2,Pdha1,Polg,Aldh18a1,Sdha,Spg7,Spr,Surf1,Tk2,Top3a,Tmem11,Sco2,Dnm1l,Fars2,Afg3l2,Polg2,Rpia,Pmpca,Amacr,Pnkd,Coq2,Pnpla8,Mecr,Taco1,Glrx5,Lipt1,Nsun2,Ttc19,Mtpap,Dars2,Vps13d,Foxred1,Ndufa12,Aars2,Coa7,Ndufaf…
98	Hypoglycemia	DisGeNET	0.0315184	Acadl,Acadm,Acadsb,Acadvl,Acat1,Auh,Bckdha,Bckdhb,Bcs1l,Bid,Car5a,Slc25a20,Cpt1a,Cpt2,Dbt,Timm8a1,Dguok,Dld,Etfa,Etfb,Etfdh,Gcdh,Gykl1,Glud1,Gsr,Hsd17b10,Hadha,Hadh,Hmgcl,Hmgcs2,Mpv17,ND1,ND2,ND3,Ndufa1,Ndufa6,Ndufb3,Ndufb9,Ndufb10,Ndufs1,Ndufs2,Ndufs3,Ndufv1,Ndufs4,Ndufs8,Ndufv2,Otc,Pcx,Pcca,Pccb,Pck2,Sod2,Star,Tfam,Ucp2,Uqcrb,Uqcrc2,Suclg1,Prepl,Dnm1l,Lrpprc,Wars2,Mlycd,Mto1,Ndufaf3,Uqcrq,Gls2,…
98	Brain atrophy	DisGeNET	0.0323354	Aldh2,Tspo,Ndufs1,Ndufs2,Ndufv1,Ndufv2,Pcca,Polg,Yme1l1,Trmt5,Nars2,Serac1,Timm50
98	Retinitis Pigmentosa	DisGeNET	0.0354362	Aldh3a2,Arl2,Aldh7a1,Bcl2,Bcs1l,C1qbp,Cox6b1,Cox7b,Cox8a,Cox10,Cox15,Echs1,Fasn,Gykl1,Hadha,Hadhb,Hadh,Hccs,Idh2,Idh3a,Idh3b,ATP6,CYTB,ND1,ND2,ND3,ND4,ND5,ND6,Ndufa2,Ndufa4,Ndufa9,Ndufa10,Ndufs1,Ndufs2,Ndufs3,Ndufv1,Ndufs4,Ndufs8,Ndufv2,Otc,Pdha1,Phyh,Polg,Aldh18a1,Sco1,Sdha,Sdhb,Sdhd,Sod1,Surf1,Tst,Aifm1,Snap29,Fastkd2,Amacr,Poldip2,Trnt1,Taco1,Lipt1,Cycs,Ndufb11,Foxred1,Ndufa12,Ndufaf5,Pank2,Co…
98	Sensorineural Hearing Loss (disorder)	DisGeNET	0.0379851	Acadvl,Ak2,Abcd1,Bcs1l,Cat,Cox6b1,Cox8a,Cox10,Cox15,Timm8a1,Dguok,Echs1,Gfer,Hsd17b10,Hsd17b4,Idh3a,Idh3b,ATP6,COX1,COX2,COX3,ND1,ND2,ND3,ND4,ND5,ND6,Ndufa1,Ndufa6,Ndufb3,Ndufb9,Ndufb10,Ndufs1,Ndufs2,Ndufs3,Ndufv1,Ndufs4,Ndufs8,Ndufv2,Ogdh,Opa1,Pdk3,Phyh,Polg,Aldh18a1,Sco1,Sdha,Sdhd,Sod2,Surf1,Tk2,Top3a,Pex11b,Sucla2,Aifm1,Snap29,Lonp1,Mfn2,Sco2,Dnm1l,Tsfm,Txnrd2,Yme1l1,Immt,Fastkd2,Lars2,Hars2,N…
98	Failure to Thrive	DisGeNET	0.0382311	Acads,Aco2,Agxt,Ak2,Abcd1,Slc25a4,Auh,Bcs1l,Casp8,Comt,Cox6b1,Cox7b,Cox8a,Cox10,Cox15,Cps1,Cyp11a1,Cyp11b1,Cyp24a1,Cyp27b1,Dguok,Dld,Echs1,Fh1,Gatm,Gcdh,Got2,Hadha,Hadhb,Hadh,Hccs,Hsd17b4,Letm1,Mdh2,Mipep,Mpv17,ATP6,ND1,ND2,ND3,ND4,ND5,ND6,Ndufa1,Ndufa2,Ndufa4,Ndufa6,Ndufa9,Ndufa10,Ndufb3,Ndufb8,Ndufb9,Ndufb10,Ndufs1,Ndufs2,Ndufs3,Ndufv1,Ndufs4,Ndufs8,Ndufv2,Otc,Pcca,Pccb,Pdha1,Slc25a3,Polg,Pycr1…
98	Cerebral atrophy	DisGeNET	0.0407797	Aldh2,Auh,Bcs1l,Tspo,Cyp27a1,Dguok,Dmpk,Fh1,Ndufa2,Ndufa9,Ndufs1,Ndufs2,Ndufv1,Ndufv2,Pcca,Pccb,Pdha1,Polg,Tk2,Suclg1,Sucla2,Aifm1,Dnm1l,Wars2,Fars2,Yme1l1,Dhx30,Prdx5,Pars2,Fbxl4,Coq2,Htra2,Trit1,Nsun2,Ttc19,Dars2,Coq9,Rars2,Trmt5,Cars2,Nars2,Slc25a22,Clpb,Serac1,Lyrm7,Timm50,Mars2,Nadk2,Iba57
98	Anemia	DisGeNET	0.0409001	Abcb7,Agxt,Ak2,Alas2,Slc25a5,Bcl2,Car5a,Casp3,Cat,Cox6b1,Cox8a,Cox10,Cox15,Dbi,Decr1,Echs1,Fabp1,Fech,Fhit,Gpx1,Gsr,Hmgcl,Idh2,Maob,CYTB,Mtx1,Ndufa2,Ndufa4,Ndufa9,Ndufa10,Ndufb8,Ndufs1,Ndufs2,Ndufs3,Ndufv1,Ndufs4,Ndufs8,Ndufv2,Pcca,Pccb,Pdha1,Polg,Ppox,Acsm3,Sco1,Sdha,Sdhb,Sdhc,Shmt2,Sod1,Sod2,Spg7,Surf1,Uqcrfs1,Recql4,Mfn2,Sco2,Bcl2l11,Aass,Slc25a13,Txnrd2,Fastkd2,Ndufaf3,Acad8,Bbc3,Coq2,Ak3,Yar…
98	Optic Atrophy	DisGeNET	0.0436504	Aco2,Agxt,Auh,Bcl2,Bcs1l,Comt,Cox6b1,Cox8a,Cox10,Cox15,Decr1,Timm8a1,Dguok,Sardh,Dmpk,Echs1,Fdxr,Fh1,Fxn,Hsd17b10,Idh3a,Idh3b,Letm1,Mipep,ATP6,COX1,COX2,COX3,CYTB,ND1,ND2,ND3,ND4,ND4L,ND5,ND6,Ndufa2,Ndufa4,Ndufa9,Ndufa10,Ndufb8,Ndufs1,Ndufs2,Ndufs3,Ndufv1,Ndufs4,Ndufs8,Ndufv2,Oat,Opa1,Pdha1,Polg,Sco1,Sdha,Sdhd,Spg7,Ssbp1,Surf1,Tk2,Txnrd1,Pdhx,Pex11b,Snap29,Recql4,Mfn2,Sco2,Dnm1l,Tsfm,Wars2,Micu1,…
99	Gastric Adenocarcinoma	DisGeNET	0.0471017	Apex1,Bcl2,Stom,Fasn,Gls,Letm1,Mcl1,COX2,Sdha,Dnm1l,Stoml2,Gstk1
100	Agenesis of corpus callosum	DisGeNET	0.0420228	Abat,Acaca,Acacb,Acadvl,Abcd1,Amt,Bcl2,Bnip3,Casp3,Cox7b,Cpt2,Cyp11a1,Cyp11b2,Decr1,Timm8a1,Sardh,Fh1,Gcsh,Gldc,Hccs,Hint1,Hsd17b4,Hspa9,Hspd1,Letm1,COX2,Pdha1,Prkaca,Pycr1,Aldh18a1,Sdhb,Star,Aifm1,Lonp1,Recql4,Mfn2,Glyat,Acot7,Hibch,Bbc3,Pycr2,Mrps16,Ndufb11,Tmlhe,Diablo,Slc25a19,Pink1,Nars2,Ears2
102	Tuberculosis	DisGeNET	0.0347691	Acaca,Aldh2,Bcl2,Bcs1l,Tspo,Casp3,Casp8,Casp9,Cat,Cpox,Cryz,Cyp27b1,Decr1,Dld,Sardh,Dut,Ehhadh,Fasn,Fdxr,Fhit,Fpgs,Fth1,Gykl1,Gls,Gsr,Gstz1,Hspd1,Hspe1,Mcl1,COX2,Ndufs3,Ndufs4,Pcx,Slc25a3,Sdhd,Prdx2,Tst,Txnrd1,Vdac1,Aldh5a1,H2-Ke6,Sucla2,Mfn2,Bcl2l10,Bcl2l11,Abcb6,Ppif,Fastk,Phb2,Acot7,Pmpca,Lars2,Mlycd,Amacr,Prdx5,Poldip2,Acad8,Trit1,Sars2,Oxsm,Dars2,Vps13d,Mccc1,Nln,Trmt5,Sugct,Chchd6,Cbr4,Atad…
102	Infection by human herpesvirus 6	DisGeNET	0.0399692	Cpt2,Polg,Acot13
103	Nicotinamide adenine dinucleotide coenzyme Q reductase deficiency	DisGeNET	0.0100105	Slc25a10,ND1,ND3,ND5,ND6,Ndufa1,Ndufa2,Ndufa9,Ndufa10,Ndufb3,Ndufb6,Ndufb8,Ndufb9,Ndufb10,Ndufs1,Ndufs2,Ndufs3,Ndufv1,Ndufs4,Ndufs8,Ndufv2,Polg,Sod2,Slc25a27,Pdss1,Mto1,Ndufaf3,Acad9,Ndufaf4,Ndufaf1,Ndufb11,Foxred1,Tmem126b,Ndufa12,Rars2,Elac2,Nubpl,Ndufaf2,Ndufaf6,Ndufs7
104	Retinitis Pigmentosa	DisGeNET	0.032912	Aldh3a2,Arl2,Aldh7a1,Bcl2,Bcs1l,C1qbp,Cox6b1,Cox7b,Cox8a,Cox10,Cox15,Echs1,Fasn,Gykl1,Hadha,Hadhb,Hadh,Hccs,Idh2,Idh3a,Idh3b,ATP6,CYTB,ND1,ND2,ND3,ND4,ND5,ND6,Ndufa2,Ndufa4,Ndufa9,Ndufa10,Ndufs1,Ndufs2,Ndufs3,Ndufv1,Ndufs4,Ndufs8,Ndufv2,Otc,Pdha1,Phyh,Polg,Aldh18a1,Sco1,Sdha,Sdhb,Sdhd,Sod1,Surf1,Tst,Aifm1,Snap29,Fastkd2,Amacr,Poldip2,Trnt1,Taco1,Lipt1,Cycs,Ndufb11,Foxred1,Ndufa12,Ndufaf5,Pank2,Co…
104	Leigh Disease	DisGeNET	0.0394079	Bcs1l,Cox4i1,Cox8a,Cox10,Cox15,Cpox,Crat,Dld,Echs1,Fxn,ATP6,COX1,COX3,CYTB,ND1,ND2,ND3,ND4,ND5,ND6,Ndufa1,Ndufa2,Ndufa5,Ndufa9,Ndufa10,Ndufs1,Ndufs2,Ndufs3,Ndufv1,Ndufs4,Ndufs8,Ndufv2,Ogdh,Pdha1,Pdhb,Polg,Sdha,Sdhb,Sod2,Surf1,Txnrd1,Pdhx,Suclg1,Sucla2,Cox5a,Sco2,Tsfm,Lrpprc,Fars2,Lias,Ethe1,Mto1,Ndufaf3,Hibch,Uqcrq,Ndufaf4,Coq4,Taco1,Timmdc1,Lipt1,Pdp1,Ttc19,Ptcd3,Parl,Foxred1,Trmu,Iars2,Ndufa12,…
104	Anemia	DisGeNET	0.0420228	Abcb7,Agxt,Ak2,Alas2,Slc25a5,Bcl2,Car5a,Casp3,Cat,Cox6b1,Cox8a,Cox10,Cox15,Dbi,Decr1,Echs1,Fabp1,Fech,Fhit,Gpx1,Gsr,Hmgcl,Idh2,Maob,CYTB,Mtx1,Ndufa2,Ndufa4,Ndufa9,Ndufa10,Ndufb8,Ndufs1,Ndufs2,Ndufs3,Ndufv1,Ndufs4,Ndufs8,Ndufv2,Pcca,Pccb,Pdha1,Polg,Ppox,Acsm3,Sco1,Sdha,Sdhb,Sdhc,Shmt2,Sod1,Sod2,Spg7,Surf1,Uqcrfs1,Recql4,Mfn2,Sco2,Bcl2l11,Aass,Slc25a13,Txnrd2,Fastkd2,Ndufaf3,Acad8,Bbc3,Coq2,Ak3,Yar…
107	Tuberculosis	DisGeNET	0.00852144	Acaca,Aldh2,Bcl2,Bcs1l,Tspo,Casp3,Casp8,Casp9,Cat,Cpox,Cryz,Cyp27b1,Decr1,Dld,Sardh,Dut,Ehhadh,Fasn,Fdxr,Fhit,Fpgs,Fth1,Gykl1,Gls,Gsr,Gstz1,Hspd1,Hspe1,Mcl1,COX2,Ndufs3,Ndufs4,Pcx,Slc25a3,Sdhd,Prdx2,Tst,Txnrd1,Vdac1,Aldh5a1,H2-Ke6,Sucla2,Mfn2,Bcl2l10,Bcl2l11,Abcb6,Ppif,Fastk,Phb2,Acot7,Pmpca,Lars2,Mlycd,Amacr,Prdx5,Poldip2,Acad8,Trit1,Sars2,Oxsm,Dars2,Vps13d,Mccc1,Nln,Trmt5,Sugct,Chchd6,Cbr4,Atad…
107	Exudative age-related macular degeneration	DisGeNET	0.0128255	Gstz1,Sod2,Tomm40,Acad10,Gstk1
107	Carotid Atherosclerosis	DisGeNET	0.0232287	Acaa1a,Aldh2,Cyp11b1,Decr1,Maoa,Sod2,Ucp2
107	Glycogen storage disease type II	DisGeNET	0.0232287	Cpt2,Fech,Gstz1,ND5,Sod1,Sod2,Acad10
107	Iron Overload	DisGeNET	0.024861	Abcb7,Alas2,Bax,Bcl2,Bcl2l1,Bcs1l,Casp3,Cat,Decr1,Dguok,Fdxr,Fxn,Fth1,COX2,Sod2,Prdx2,Abcb6,Dnm1l,Iscu,Prdx5,Poldip2,Trnt1,Glrx5,Slc25a37,Slc25a38,Pink1,Ftmt,Sfxn1,Gstk1
107	Adenocarcinoma Of Esophagus	DisGeNET	0.033938	Bcl2,Casp8,Casp9,Cryz,Decr1,Fasn,Fhit,Fth1,Mcl1,Msra,COX1,COX2,Sod2,Sco2,Nudt6,Amacr,Mcat,Ptrh2,Gstk1
107	Drug-induced tardive dyskinesia	DisGeNET	0.0353544	Bid,Comt,Cryz,Decr1,Gpx1,Maoa,Maob,Sod2,Gstk1
107	Tardive Dyskinesia	DisGeNET	0.0353544	Bid,Comt,Cryz,Decr1,Gpx1,Maoa,Maob,Sod2,Gstk1
107	DIARRHEA 5, WITH TUFTING ENTEROPATHY, CONGENITAL	DisGeNET	0.0420228	Comt,Decr1,Gstk1
107	Infantile nystagmus syndrome	DisGeNET	0.0420228	Cat,Decr1,Gstk1
107	Infection by human herpesvirus 6	DisGeNET	0.0420228	Cpt2,Polg,Acot13
107	Diabetes Mellitus, Non-Insulin-Dependent	DisGeNET	0.042425	Acaa1a,Acaca,Acacb,Acat1,Acly,Alas1,Aldh2,Aldh7a1,Bad,Bax,Bcl2,Bcl2l1,Bcs1l,Bid,Bnip3,Tspo,Car5a,Slc25a20,Casp3,Casp8,Cat,Cbr3,Comt,Cox4i1,Cox7a1,Cox8a,Cox10,Cpt1a,Cpt1b,Cpt2,Cryz,Cs,Cyp11a1,Cyp11b1,Cyp27a1,Cyp27b1,Dbi,Decr1,Timm8a1,Dld,Sardh,Ephx2,Etfa,Fabp1,Acsl1,Fasn,Fdxr,Fhit,Fxn,Gfer,Gykl1,Gls,Got2,Gpd2,Gpx1,Gsr,Hsd17b10,Hadha,Hadh,Hccs,Hspa9,Hspd1,Idh3a,Idh3b,Maoa,Mgst3,Aldh6a1,Mpst,COX1,CO…
107	Allergic asthma	DisGeNET	0.0435411	Acaa1a,Agxt,Arg2,Bcl2,Decr1,Hspd1,Oxa1l,Poldip2,Mul1,Slc25a25,Gstk1
107	ST segment elevation myocardial infarction	DisGeNET	0.0435411	Acaca,Aldh2,Slc25a20,Cat,Decr1,Dld,Sod2,Fastk,Sirt3,Amacr,Htra2
107	Acute myocardial infarction	DisGeNET	0.0446123	Acaca,Aldh2,Bak1,Bax,Bcl2,Tspo,Casp3,Casp9,Cat,Cox8a,Cpox,Cpt1b,Cpt2,Cyp11b1,Decr1,Acsl1,Fxn,Got2,Gsr,Hspd1,COX2,Ogg1,Sod1,Sod2,Prdx2,Ucp2,Cox5a,Tomm20,Bcl2l11,Tomm40,Fastk,Sirt5,Poldip2,Bbc3,Slc25a37,Chdh,Gstk1,Ndufs7,Timm23
107	Barrett Esophagus	DisGeNET	0.0467796	Apex1,Bcl2,Cat,Cryz,Decr1,Fabp1,Fasn,Fh1,Fhit,Gpx1,Mcl1,Mgst1,Msra,COX1,COX2,Ogg1,Sod1,Sod2,Sco2,Amacr,Qrsl1,Golph3,Oma1,Gstk1
111	Arteriosclerosis	DisGeNET	0.0109434	Acaca,Acat1,Acly,Aldh2,Apex1,Bax,Bcl2,Bik,Tspo,C1qbp,Slc25a20,Casp3,Casp9,Cat,Comt,Cox8a,Cpox,Cpt2,Cry1,Cyp27a1,Cyp27b1,Decr1,Dld,Ephx2,Acsl1,Fdps,Fth1,Gfer,Got2,Gpx1,Gsr,Hspd1,Idh2,Ivd,Maoa,Mcl1,Mpv17,Msra,COX1,COX2,CYTB,Ndufa2,Ogg1,Pcx,Pdk1,Pdk4,Scp2,Sod1,Sod2,Spg7,Ssbp1,Star,Tfam,Tufm,Txnrd1,Ucp1,Ucp2,Sucla2,Alkbh1,Cox5a,Mfn2,Sco2,Abcb6,Dnm1l,Micu1,Lypla1,Prdx4,Htatip2,Txnrd2,Mthfd2,Acot7,Pmpc…
111	Atherosclerosis	DisGeNET	0.0114932	Acaca,Acat1,Acly,Agxt,Abcd1,Aldh2,Apex1,Bax,Bcl2,Bik,Tspo,C1qbp,Slc25a20,Casp3,Casp9,Cat,Comt,Cox8a,Cpox,Cpt2,Cry1,Cyp27a1,Cyp27b1,Decr1,Dld,Ephx2,Acsl1,Fdps,Fth1,Gfer,Got2,Gpx1,Gsr,Hspd1,Idh2,Ivd,Maoa,Mcl1,Msra,COX1,COX2,CYTB,Ndufa2,Ogg1,Pcx,Pdk1,Pdk4,Scp2,Sod1,Sod2,Spg7,Ssbp1,Star,Tfam,Tufm,Txnrd1,Ucp1,Ucp2,Sucla2,Alkbh1,Cox5a,Mfn2,Sco2,Abcb6,Dnm1l,Micu1,Lypla1,Prdx4,Htatip2,Txnrd2,Mthfd2,Acot7…
111	Osteoarthrosis Deformans	DisGeNET	0.048825	Ak4,Etfa,Gls,Hadha,Idh2,Idh3a,Ndufv1,Ndufs8,Opa1,Pdha1,Sdha,Sod2,Txnrd1,Vdac2,Trap1,Acaa2,Txnrd2,Immt,Hibch,Isoc2a,Gstk1
111	Osteophyte	DisGeNET	0.0493058	Acly,Fth1,Hspd1,COX2,Slc25a32,Cmc1
111	Spinocerebellar Ataxia Type 1	DisGeNET	0.0493058	Casp3,Cat,Fxn,Txnrd1,Afg3l2,Pmpca
114	Leukopenia	DisGeNET	0.021652	Ak2,Aldh2,Apex1,Bcl2,Casp3,Casp8,Cat,Fasn,Fdxr,Fh1,Hmgcl,Ivd,Mcl1,Mtx1,Spg7,Prdx2,Sucla2,Yme1l1,Acad8,Cycs,Sars2,Chpt1,Timm50,Gstk1
115	Favism	DisGeNET	0.0181536	Aldh9a1,Cryz,Decr1
115	Respiratory Distress Syndrome, Adult	DisGeNET	0.0301493	Acaca,Aco2,Tspo,Ephx2,Hadha,Mcl1,Sod2,Tst,Txnrd1,Slc25a11,Prdx6,Acaa2,Polg2,Sirt3,Poldip2,Sars2,Mfn1,Chpt1,Pank2
115	Osteoarthrosis Deformans	DisGeNET	0.0404261	Ak4,Etfa,Gls,Hadha,Idh2,Idh3a,Ndufv1,Ndufs8,Opa1,Pdha1,Sdha,Sod2,Txnrd1,Vdac2,Trap1,Acaa2,Txnrd2,Immt,Hibch,Isoc2a,Gstk1
115	Trifunctional Protein Deficiency With Myopathy And Neuropathy	DisGeNET	0.0420228	Acadvl,Slc25a20,Cox8a,Cpox,Cpt1a,Cpt2,Ehhadh,Hadha,Hadhb,Hadh,Cox5a,Sco2,Chpt1,Gfm2,Mrrf
117	Motor neuron atrophy	DisGeNET	0.00896118	Apex1,Bcl2,Decr1,Sod1,Immt,Htra2
117	Neutropenia	DisGeNET	0.0259709	Apex1,Bcl2,Casp3,Casp8,Fh1,Mcl1,Mtx1,Pcca,Pccb,Spg7,Recql4,Yme1l1,Htra2,Chpt1,Clpb,Timm50,Mmaa,Mmab
117	Sporadic Parkinson disease	DisGeNET	0.0284556	Apex1,Comt,Gpx1,Maoa,Maob,Polg,Sod1,Sod2,Spr,Dnm1l,Bckdk,Mrps30,Fastk,Htra2,Rhot1,Mccc1,Pink1,Mul1,Mtif3
117	Cerebral Infarction	DisGeNET	0.0435411	Acaca,Aldh2,Abcd2,Apex1,Aldh7a1,Bax,Bcl2,Tspo,Casp3,Cat,Cyp11b1,Decr1,Ephx2,Fabp1,COX1,COX2,Pdk1,Phb,Acsm3,Sod1,Dnm1l,Sirt3,Txn2,Poldip2,Htra2,Mrs2,Nln,Pink1,Nlrx1,Coasy,Immp2l,Gstk1
118	Abnormal globus pallidus morphology	DisGeNET	0.0420228	Ndufb8,Ndufs2,Surf1,Sco2,Ndufaf3
118	Abnormality of the cerebral cortex	DisGeNET	0.0420228	Ndufb8,Ndufs2,Surf1,Sco2,Ndufaf3
118	Congenital absence of kidneys syndrome	DisGeNET	0.0420228	Ndufb8,Ndufs2,Surf1,Sco2,Ndufaf3
118	Nicotinamide adenine dinucleotide coenzyme Q reductase deficiency	DisGeNET	0.0420228	Slc25a10,ND1,ND3,ND5,ND6,Ndufa1,Ndufa2,Ndufa9,Ndufa10,Ndufb3,Ndufb6,Ndufb8,Ndufb9,Ndufb10,Ndufs1,Ndufs2,Ndufs3,Ndufv1,Ndufs4,Ndufs8,Ndufv2,Polg,Sod2,Slc25a27,Pdss1,Mto1,Ndufaf3,Acad9,Ndufaf4,Ndufaf1,Ndufb11,Foxred1,Tmem126b,Ndufa12,Rars2,Elac2,Nubpl,Ndufaf2,Ndufaf6,Ndufs7
119	Cerebellar atrophy	DisGeNET	0.0426435	Aco2,Slc25a4,Bcs1l,Cox8a,Crat,Cyp27a1,Fxn,Hsd17b4,Mdh2,Ndufa9,Ndufs1,Ndufs4,Opa1,Polg,Spg7,Tk2,Top3a,Lonp1,Pmpcb,Abcb6,Dnm1l,Wars2,Fars2,Afg3l2,Polg2,Dhx30,Txn2,Coq2,Pnpla8,Yars2,Lipt1,Ptrh2,Ttc19,Thg1l,Dars2,Atad3a,Foxred1,Coq9,Rars2,Aars2,Coa7,Nars2,Slc25a22,L2hgdh,Opa3,Nubpl,Clpb,Serac1,Mgme1,Mars2,Nadk2,Iba57,Rnaseh1
120	MITOCHONDRIAL COMPLEX I DEFICIENCY	DisGeNET	0.0423453	Slc25a10,ND1,ND2,ND3,ND4,Ndufa1,Ndufa6,Ndufb3,Ndufb8,Ndufb9,Ndufb10,Ndufs1,Ndufs2,Ndufs3,Ndufv1,Ndufs4,Ndufs8,Ndufv2,Aifm1,Sirt3,Ndufaf3,Ndufaf4,Ndufaf1,Timmdc1,Gdap1,Ndufb11,Foxred1,Tmem126b,Elac2,Ndufaf5,Nubpl,Ndufaf2,Ndufaf6,Ndufs7
126	Follicular adenoma	DisGeNET	0.0227571	Bcl2,Bcl2l1,Tspo,Got2,COX2,Nthl1,Phb,Txnrd1,Prdx6,Amacr,Stoml2,Gfm1,Tstd1
128	Myasthenias	DisGeNET	0.040872	Acadl,Prepl,Acad9
130	Triple-Negative Breast Carcinoma	DisGeNET	0.0247664	Acaca,Apex1,Bad,Bak1,Bax,Bcl2,Bcl2l1,Bid,Bnip3,Tspo,C1qbp,Casp3,Casp8,Casp9,Cat,Comt,Cryz,Cyp24a1,Timm8a1,Dhodh,Sardh,Fasn,Fth1,Gls,Got2,Gsr,Idh2,Ldhb,Maob,Mcl1,CYTB,Ndufs4,Ogg1,Sod2,Spg7,Ssbp1,Star,Prdx2,Txnrd1,Uqcrfs1,Vdac1,Slc25a16,Lonp1,Abcb6,Dnm1l,Lrpprc,Abca9,Wars2,Txnrd2,Sirt5,Prdx5,Poldip2,Bbc3,Mcat,Diablo,Chpt1,Mul1,Nlrx1,Immp2l,Mtg1,Mmab,Gstk1,Ndufs7
130	Squamous cell carcinoma of the head and neck	DisGeNET	0.024861	Acaca,Acacb,Aldh2,Apex1,Arg2,Bax,Bcl2,Bcl2l1,Casp3,Casp8,Casp9,Cat,Comt,Cryz,Decr1,Timm8a1,Dlat,Fhit,Fth1,Gls,Gpx1,Idh2,Mcl1,COX1,COX2,COX3,CYTB,Mutyh,Oat,Ogg1,Oxa1l,Pdha1,Pdk1,Polb,Shmt2,Sod2,Prdx2,Tfam,Txnrd1,Uqcrfs1,Slc25a16,Dnaja3,Pmpcb,Sco2,Bcl2l11,Dnm1l,Lrpprc,Micu1,Prdx4,Mrpl28,Phb2,Acot7,Sirt4,Sirt3,Poldip2,Bbc3,Stoml2,Nsun2,Diablo,Mrpl41,Mul1,Nlrx1,Them4,Gstk1
130	Triple Negative Breast Neoplasms	DisGeNET	0.024861	Acaca,Apex1,Bad,Bak1,Bax,Bcl2,Bcl2l1,Bid,Bnip3,Tspo,C1qbp,Casp3,Casp8,Casp9,Cat,Comt,Cryz,Cyp24a1,Timm8a1,Dhodh,Sardh,Fasn,Fth1,Gls,Got2,Gsr,Idh2,Ldhb,Maob,Mcl1,COX2,CYTB,Ndufs4,Ogg1,Sod2,Spg7,Ssbp1,Star,Prdx2,Txnrd1,Uqcrfs1,Vdac1,Slc25a16,Lonp1,Abcb6,Dnm1l,Lrpprc,Abca9,Wars2,Txnrd2,Sirt5,Prdx5,Poldip2,Bbc3,Mcat,Diablo,Chpt1,Mul1,Nlrx1,Immp2l,Mtg1,Mmab,Gstk1,Ndufs7
130	Ovarian Carcinoma	DisGeNET	0.0393025	Bcl2,Bcl2l1,Casp3,Cs,Timm8a1,Fasn,Fhit,Mcl1,COX1,COX2,Polb,Sod2,Uqcrfs1,Sco2,Bcl2l11,Sirt3,Dnajc15,Diablo,Gstk1
130	Adenocarcinoma of colon	DisGeNET	0.040872	Bcl2,Bcs1l,Casp3,Timm8a1,Dld,Fech,Fhit,Fxn,Got2,Hspd1,Mcl1,Mpst,Mutyh,Sod1,Tfam,Uqcrfs1,Aifm1,Prdx5,Gls2,Pnpt1
130	Unipolar Depression	DisGeNET	0.0435411	Bcl2,Tspo,Cat,Comt,Cry1,Timm8a1,Fhit,Fth1,Gls,Maoa,Maob,Msra,COX2,Ndufv1,Ndufv2,Sod1,Star,Kmo,Tomm40,Amacr,Pink1,Acsm1,Nat8l
131	Cryptorchidism	DisGeNET	0.0483502	Bax,Bcl2l1,Casp3,Cat,Comt,Cyp11a1,Dhodh,Dmpk,Gfer,Letm1,Pycr1,Sod1,Star,Pex11b,Lonp1,Recql4,Txnrd2,Paics,Hibch,Htra2,Slc25a24,Nsun2,Tmem70,Atad3a,Uqcc2,Atpaf2
133	Pheochromocytoma, Extra-Adrenal	DisGeNET	0.00837286	Comt,Dlst,Sardh,Fh1,Maoa,Maob,Mdh2,Sdha,Sdhb,Sdhc,Sdhd,Slc25a11,Sdhaf2
133	Fulminant Hepatic Failure with Cerebral Edema	DisGeNET	0.0117412	Tspo,Maoa,Maob
133	Hepatic Coma	DisGeNET	0.0117412	Tspo,Maoa,Maob
133	Hepatic Stupor	DisGeNET	0.0117412	Tspo,Maoa,Maob
133	Oppositional Defiant Disorder	DisGeNET	0.0117412	Comt,Maoa,Maob
133	Paranoid Schizophrenia	DisGeNET	0.0117412	Comt,Maoa,Maob
133	Antisocial Personality Disorder	DisGeNET	0.0160775	Aldh2,Cat,Maoa,Maob
133	Gambling, Pathological	DisGeNET	0.0160775	Comt,Maoa,Maob,Chpt1
133	Abnormal involuntary movement	DisGeNET	0.021652	Comt,Maoa,Maob,Sod2,Pank2
133	Akinetic-Rigid Variant of Huntington Disease	DisGeNET	0.021652	Maoa,Maob,Ogg1,Aifm1,Diablo
133	Conduct Disorder	DisGeNET	0.021652	Aldh2,Comt,Gldc,Maoa,Maob
133	Huntington Disease, Late Onset	DisGeNET	0.021652	Maoa,Maob,Ogg1,Aifm1,Diablo
133	Juvenile Huntington Disease	DisGeNET	0.021652	Maoa,Maob,Ogg1,Aifm1,Diablo
133	Pheochromocytoma	DisGeNET	0.0227571	Acaca,Bcl2,Casp3,Casp8,Cat,Comt,Cs,Dlst,Sardh,Fh1,Idh2,Maoa,Maob,Mdh2,Slc25a3,Sdha,Sdhb,Sdhc,Sdhd,Star,Ucp1,Abcb6,Dnm1l,Pmpca,Sdhaf2
133	Endometrioma	DisGeNET	0.024861	Maoa,Maob,COX2,Phb,Suclg2,Sco2
133	Norrie disease	DisGeNET	0.024861	Bnip3,Maoa,Maob,Oat,Sod1,Poldip2
133	Drug-induced tardive dyskinesia	DisGeNET	0.0388454	Bid,Comt,Cryz,Decr1,Gpx1,Maoa,Maob,Sod2,Gstk1
133	Restless Legs Syndrome	DisGeNET	0.0388454	Cpt1b,Fxn,Maoa,Maob,Mfn2,Park7,Htra2,Slc25a37,Pink1
133	Tardive Dyskinesia	DisGeNET	0.0388454	Bid,Comt,Cryz,Decr1,Gpx1,Maoa,Maob,Sod2,Gstk1
133	Mood swings	DisGeNET	0.0391484	Bcs1l,Cox10,Cox15,Sardh,Echs1,Maoa,Ndufa2,Ndufa4,Ndufa9,Ndufa10,Ndufs1,Ndufs2,Ndufs3,Ndufv1,Ndufs4,Ndufs8,Ndufv2,Pdha1,Polg,Prkaca,Sdha,Sod1,Surf1,Taco1,Lipt1,Mtpap,Foxred1,Ndufa12,Ndufaf5,Pank2,Ndufaf2,Mtfmt,Ndufaf6,Nags,Ndufs7,Chchd10,Pet100
133	Attention deficit hyperactivity disorder	DisGeNET	0.0435347	Acaca,Abcd1,Aldh2,Casp3,Cat,Comt,Cpt2,Cry1,Timm8a1,Fhit,Glud1,Maoa,Maob,COX1,COX2,COX3,ND1,ND4,ND5,ND6,Pcx,Pde2a,Polg,Sdha,Sdhd,Sod1,Spg7,Bcl2l10,Park7,Vwa8,Pars2,Htra2,Trit1,Nsun2,Dhtkd1,Chpt1,Coa7,Pank2,Ndufaf2,Them4,Mtfmt,Nat8l
133	Borderline Personality Disorder	DisGeNET	0.0435411	Bcl2,Comt,Dbt,Gstz1,Maoa,Maob,Mpst,Spg7,Mcat,Chdh,Nif3l1
133	Substance abuse problem	DisGeNET	0.0435411	Abat,Acaca,Comt,Ehhadh,Fhit,Maoa,Maob,Msra,Mpc1,Chchd3,C330018D20Rik
133	Fibromyalgia	DisGeNET	0.0471017	Tspo,Cat,Comt,Gpx1,Gsr,Maoa,Maob,CYTB,Sod1,Mfn2,Abcb6,Golph3
134	Hyperoxaluria	DisGeNET	0.0397025	Agxt,Decr1,Grhpr,Poldip2,Hao2,Hoga1
134	Glycogen storage disease type II	DisGeNET	0.0467796	Cpt2,Fech,Gstz1,ND5,Sod1,Sod2,Acad10
136	Renal Cell Dysplasia	DisGeNET	0.00522298	Ndufb8,Ndufs2,Surf1,Sco2,Coq7,Ndufaf3,Rmnd1,Qrsl1,Slc25a22
136	Renal dysplasia	DisGeNET	0.00522298	Ndufb8,Ndufs2,Surf1,Sco2,Coq7,Ndufaf3,Rmnd1,Qrsl1,Slc25a22
136	Diffuse white matter abnormalities	DisGeNET	0.0244595	Ndufb8,Ndufs2,Pdha1,Surf1,Sco2,Ndufaf3,Slc25a22,Timm50
138	Hypertrichosis	DisGeNET	0.035609	Acaca,Bcs1l,Cox10,Cox15,Cpox,Echs1,Ndufa2,Ndufa4,Ndufa9,Ndufa10,Ndufb8,Ndufs1,Ndufs2,Ndufs3,Ndufv1,Ndufs4,Ndufs8,Ndufv2,Pdha1,Sdha,Surf1,Sco2,Ndufaf3,Slc25a24,Taco1,Lipt1,Foxred1,Ndufa12,Ndufaf5,Ndufaf2,Sfxn1,Mtfmt,Ndufaf6,Ndufs7,Pet100
138	Abnormal globus pallidus morphology	DisGeNET	0.0420228	Ndufb8,Ndufs2,Surf1,Sco2,Ndufaf3
138	Abnormality of the cerebral cortex	DisGeNET	0.0420228	Ndufb8,Ndufs2,Surf1,Sco2,Ndufaf3
138	Congenital absence of kidneys syndrome	DisGeNET	0.0420228	Ndufb8,Ndufs2,Surf1,Sco2,Ndufaf3
138	Nicotinamide adenine dinucleotide coenzyme Q reductase deficiency	DisGeNET	0.0420228	Slc25a10,ND1,ND3,ND5,ND6,Ndufa1,Ndufa2,Ndufa9,Ndufa10,Ndufb3,Ndufb6,Ndufb8,Ndufb9,Ndufb10,Ndufs1,Ndufs2,Ndufs3,Ndufv1,Ndufs4,Ndufs8,Ndufv2,Polg,Sod2,Slc25a27,Pdss1,Mto1,Ndufaf3,Acad9,Ndufaf4,Ndufaf1,Ndufb11,Foxred1,Tmem126b,Ndufa12,Rars2,Elac2,Nubpl,Ndufaf2,Ndufaf6,Ndufs7
138	Progressive cerebellar ataxia	DisGeNET	0.0435411	Auh,Cox15,Echs1,Fxn,Gls,Ndufa2,Ndufa4,Ndufa9,Ndufa10,Ndufs1,Ndufs2,Ndufs3,Ndufv1,Ndufs4,Ndufs8,Ndufv2,Pdha1,Polg,Sdha,Surf1,Aifm1,Slc25a15,Pitrm1,Afg3l2,Pmpca,Coq2,Taco1,Lipt1,Mtpap,Dars2,Foxred1,Ndufa12,Ndufaf5,Ndufaf2,Mgme1,Mars2,Mtfmt,Ndufaf6,Ndufs7,Chchd10,Pet100
140	Diabetic Cardiomyopathies	DisGeNET	0.0467796	Slc25a4,Bad,Bcl2,Casp3,Casp8,Casp9,Decr1,Maoa,Opa1,Phb,Vdac1,Lonp1,Micu1,Sirt3,Poldip2
141	Pyruvate Dehydrogenase Complex Deficiency Disease	DisGeNET	0.011943	Dlat,Dld,Echs1,Gstz1,Pdha1,Pdhb,Pdk4,Pdhx,Lonp1,Lipt1,Pdp1,Chpt1
141	Leigh Disease	DisGeNET	0.0250784	Bcs1l,Cox4i1,Cox8a,Cox10,Cox15,Cpox,Crat,Dld,Echs1,Fxn,ATP6,COX1,COX3,CYTB,ND1,ND2,ND3,ND4,ND5,ND6,Ndufa1,Ndufa2,Ndufa5,Ndufa9,Ndufa10,Ndufs1,Ndufs2,Ndufs3,Ndufv1,Ndufs4,Ndufs8,Ndufv2,Ogdh,Pdha1,Pdhb,Polg,Sdha,Sdhb,Sod2,Surf1,Txnrd1,Pdhx,Suclg1,Sucla2,Cox5a,Sco2,Tsfm,Lrpprc,Fars2,Lias,Ethe1,Mto1,Ndufaf3,Hibch,Uqcrq,Ndufaf4,Coq4,Taco1,Timmdc1,Lipt1,Pdp1,Ttc19,Ptcd3,Parl,Foxred1,Trmu,Iars2,Ndufa12,…
141	Malar flattening	DisGeNET	0.0289107	Comt,Dhodh,Pycr1,Lrpprc,Pycr2
142	Bronchial Hyperreactivity	DisGeNET	0.0232287	Casp8,Ndufa2,Sod2,Uqcrc2,Gstk1
142	Exudative age-related macular degeneration	DisGeNET	0.0232287	Gstz1,Sod2,Tomm40,Acad10,Gstk1
142	Coronary heart disease	DisGeNET	0.0330343	Acaca,Acacb,Acads,Acat1,Aldh2,Apex1,Bax,Bcl2,C1qbp,Slc25a20,Cat,Ckmt2,Comt,Cox8a,Cps1,Cyp11b1,Cyp27a1,Decr1,Ephx2,Fabp1,Fhit,Fxn,Got2,Gpx1,Gsr,Guk1,Hspd1,Hspe1,Msra,COX1,COX2,Ndufs2,Ogdh,Ogg1,Opa1,Otc,Oxct1,Pcx,Sod1,Sod2,Spg7,Ucp1,Ucp2,Mfn2,Sco2,Abcb6,Tomm40,Mrpl28,Pmpca,Sirt4,Sirt3,Pdss1,Mthfd1l,Ak3,Dus2,Qrsl1,Chdh,Parl,Stard7,Nln,Agxt2,Flad1,Acad10,Ears2,Tamm41,Mmab,Gstk1
142	Exfoliation Syndrome	DisGeNET	0.0347691	Gls,Mgst1,COX2,Sod2,Txnrd2,Opa3,Gstk1
142	Sudden sensorineural hearing loss	DisGeNET	0.0347691	Cat,Cox8a,Gls,Gpx1,Sod1,Sod2,Gstk1
142	Mammary Carcinoma, Human	DisGeNET	0.0353544	Nudt2,Bax,Bcl2,C1qbp,Casp8,Cat,Comt,Cpt1a,Cyp24a1,Fasn,Gpx1,Hadhb,Ldhb,Ndufs3,Pde2a,Phb,Sod2,Dap3,Mrpl19,Mrps28,Mrpl13,Mrps7,Mrps23,Rmnd1,Cmc2,Mrps22,Mrpl9,Ldhal6b,Mtfmt,Gstk1
142	Dental Fluorosis, Acquired	DisGeNET	0.0388454	Bcl2,Comt,Sod1,Sod2,Dnm1l,Fis1,Mfn1,Gstk1
142	Oligospermia	DisGeNET	0.0388454	Casp3,Ephx2,Oat,Polg,Sod1,Sod2,Spata20,Gstk1
142	Drug-induced tardive dyskinesia	DisGeNET	0.0420228	Bid,Comt,Cryz,Decr1,Gpx1,Maoa,Maob,Sod2,Gstk1
142	Pancreatitis, Chronic	DisGeNET	0.0420228	Aldh2,Bad,Bcl2,Cat,Comt,Cyp24a1,Sod2,Pdhx,Gstk1
142	Squamous cell carcinoma of tongue	DisGeNET	0.0420228	Apex1,Bax,Bcl2,Casp3,Casp9,Guk1,COX2,Sod2,Fis1
142	Tardive Dyskinesia	DisGeNET	0.0420228	Bid,Comt,Cryz,Decr1,Gpx1,Maoa,Maob,Sod2,Gstk1
142	Amyotrophic Lateral Sclerosis, Sporadic	DisGeNET	0.0446123	Apex1,Bcl2l1,Cat,Cyp27a1,Gsr,Idi1,Sod1,Sod2,Slc25a12,Coasy
142	Respiratory Distress Syndrome, Newborn	DisGeNET	0.0446123	Aldh7a1,Bcl2,Casp3,Cat,Sod1,Sod2,Tst,Poldip2,Chpt1,Gstk1
142	Skin Carcinogenesis	DisGeNET	0.0446123	Acaca,Bcl2,Casp3,Dhodh,Gpx1,Ogg1,Sod2,Ucp3,Mul1,Gstk1
142	Urticaria	DisGeNET	0.0446123	Agxt,Aldh3a2,Cat,Gpx1,Sdhb,Sdhc,Sod1,Sod2,Lrpprc,Gstk1
142	Malignant mesothelioma	DisGeNET	0.0483502	Bcl2,Casp8,Fhit,Fth1,Mcl1,COX2,Sod2,Txnrd1,Mrpl28,Prdx3,Gstk1
144	D-2-HYDROXYGLUTARIC ACIDURIA 1	DisGeNET	0.0144196	Gcdh,Idh2,L2hgdh,D2hgdh
145	Gastroesophageal reflux disease	DisGeNET	0.0420228	Abat,Slc25a4,Comt,Eci1,Letm1,ATP6,COX1,COX2,Polg,Pycr1,Aldh18a1,Lonp1,Polg2,Pars2,Fbxl4,Slc25a24,Trmt10c,Mrps34,Mcee,Atad1,Gstk1
148	Tuberculosis	DisGeNET	0.00737069	Acaca,Aldh2,Bcl2,Bcs1l,Tspo,Casp3,Casp8,Casp9,Cat,Cpox,Cryz,Cyp27b1,Decr1,Dld,Sardh,Dut,Ehhadh,Fasn,Fdxr,Fhit,Fpgs,Fth1,Gykl1,Gls,Gsr,Gstz1,Hspd1,Hspe1,Mcl1,COX2,Ndufs3,Ndufs4,Pcx,Slc25a3,Sdhd,Prdx2,Tst,Txnrd1,Vdac1,Aldh5a1,H2-Ke6,Sucla2,Mfn2,Bcl2l10,Bcl2l11,Abcb6,Ppif,Fastk,Phb2,Acot7,Pmpca,Lars2,Mlycd,Amacr,Prdx5,Poldip2,Acad8,Trit1,Sars2,Oxsm,Dars2,Vps13d,Mccc1,Nln,Trmt5,Sugct,Chchd6,Cbr4,Atad…
148	Fibrosis of pancreas	DisGeNET	0.0435411	Aldh2,Decr1,Poldip2,Ptrh2
149	Spinocerebellar Ataxia Type 1	DisGeNET	0.0227571	Casp3,Cat,Fxn,Txnrd1,Afg3l2,Pmpca
149	Primary sclerosing cholangitis	DisGeNET	0.0446123	Abcd1,Bcl2,Bcl2l1,Casp3,Dlat,Mcl1,COX2,Sod2,Txnrd1,Bcl2l11,Txn2,Poldip2,Acad8
149	Optic Atrophy	DisGeNET	0.0467796	Aco2,Agxt,Auh,Bcl2,Bcs1l,Comt,Cox6b1,Cox8a,Cox10,Cox15,Decr1,Timm8a1,Dguok,Sardh,Dmpk,Echs1,Fdxr,Fh1,Fxn,Hsd17b10,Idh3a,Idh3b,Letm1,Mipep,ATP6,COX1,COX2,COX3,CYTB,ND1,ND2,ND3,ND4,ND4L,ND5,ND6,Ndufa2,Ndufa4,Ndufa9,Ndufa10,Ndufb8,Ndufs1,Ndufs2,Ndufs3,Ndufv1,Ndufs4,Ndufs8,Ndufv2,Oat,Opa1,Pdha1,Polg,Sco1,Sdha,Sdhd,Spg7,Ssbp1,Surf1,Tk2,Txnrd1,Pdhx,Pex11b,Snap29,Recql4,Mfn2,Sco2,Dnm1l,Tsfm,Wars2,Micu1,…
150	Macrocephaly	DisGeNET	0.00289625	Acadm,Acadvl,Etfa,Etfb,Etfdh,Gcdh,Hsd17b4,Mcl1,Sdhb,Sdhc,Sdhd,Pex11b,Yme1l1,Pdss1,L2hgdh,D2hgdh
150	Glutaric Aciduria IIA	DisGeNET	0.00522298	Etfa,Etfb,Etfdh
150	Glutaric Aciduria IIB	DisGeNET	0.00522298	Etfa,Etfb,Etfdh
150	Glutaric Aciduria IIC	DisGeNET	0.00522298	Etfa,Etfb,Etfdh
150	Hepatic periportal necrosis	DisGeNET	0.00522298	Etfa,Etfb,Etfdh
150	Neutral Lipid Storage Disease with Myopathy	DisGeNET	0.00522298	Etfa,Etfb,Etfdh
150	Fatty Liver	DisGeNET	0.00522298	Acaca,Acacb,Acadl,Acadm,Acadvl,Acly,Abcd1,Aldh2,Bcs1l,Bid,Bnip3,Casp3,Casp8,Cat,Cox15,Cps1,Cpt1a,Cpt1b,Cpt2,Cs,Decr1,Dguok,Etfa,Etfb,Etfdh,Fabp1,Fasn,Gfer,Got2,Gpx1,Hadha,Hadhb,Hadh,Hsd17b4,Idh2,Mcl1,Mpst,Msra,COX2,ND3,Opa1,Otc,Pck2,Pdk4,Scp2,Sod1,Sod2,Spg7,Star,Suox,Tfam,Ucp1,Ucp2,Vdac1,Mfn2,Ppif,Lrpprc,Slc25a13,Sirt3,Mlycd,Mcat,Acad9,Fis1,Mrps7,Ptrh2,Cycs,Rmnd1,Acot13,Sphk2,Chpt1,Lyrm4,Gpam,Pin…
150	Steatohepatitis	DisGeNET	0.00732125	Acaca,Acadl,Acadm,Acadvl,Acly,Abcd1,Aldh2,Bax,Bcl2,Bcs1l,Bid,Bnip3,Casp3,Casp8,Cat,Cox8a,Cox15,Cps1,Cpt1a,Cpt1b,Cpt2,Cs,Decr1,Dguok,Dlat,Etfa,Etfb,Etfdh,Fabp1,Fasn,Gfer,Gpx1,Hadha,Hadhb,Hadh,Hsd17b4,Idh2,Mcl1,Mpst,Msra,COX1,COX2,ND3,ND6,Otc,Pck2,Pdk4,Polg,Sod1,Sod2,Spg7,Star,Prdx2,Tfam,Ucp1,Ucp2,Vdac1,Mfn2,Sco2,Abcb6,Dnm1l,Ppif,Lrpprc,Slc25a13,Prdx4,Sirt3,Mlycd,Samm50,Acot11,Poldip2,Bbc3,Mcat,Aca…
150	Triglyceride storage disease with ichthyosis	DisGeNET	0.0100516	Cpt2,Etfa,Etfb,Etfdh,Agk
150	Congenital hypoplasia of lung	DisGeNET	0.011943	Etfa,Etfb,Etfdh,Coq7,Slc25a24,Aars2
150	Pachygyria	DisGeNET	0.0189202	Dlst,Etfa,Etfb,Etfdh,Snap29,Pycr2,Rmnd1,Slc25a22,Isca1
150	Zellweger Syndrome	DisGeNET	0.0189202	Abcd1,Abcd2,Tspo,Cat,Dbi,Etfa,Hsd17b4,Abcd3,Pex11b
150	Hypoglycemic coma	DisGeNET	0.021652	Acadm,Etfa,Etfb,Etfdh,Glud1,Hadh,Hmgcl,Prodh,Star,Txnrd2
150	Renal carnitine transport defect	DisGeNET	0.0227571	Acadm,Cpt1a,Cpt1b,Cpt2,Etfa,Etfb,Etfdh,Pdk4,Tk2,Tmlhe,Chpt1
150	Multiple Acyl Coenzyme A Dehydrogenase Deficiency	DisGeNET	0.0244595	Slc25a20,Cpt1a,Cpt1b,Cpt2,Etfa,Etfb,Etfdh,Gsr,CYTB,Sod2,Chpt1,Flad1
150	Hypoglycemia	DisGeNET	0.040872	Acadl,Acadm,Acadsb,Acadvl,Acat1,Auh,Bckdha,Bckdhb,Bcs1l,Bid,Car5a,Slc25a20,Cpt1a,Cpt2,Dbt,Timm8a1,Dguok,Dld,Etfa,Etfb,Etfdh,Gcdh,Gykl1,Glud1,Gsr,Hsd17b10,Hadha,Hadh,Hmgcl,Hmgcs2,Mpv17,ND1,ND2,ND3,Ndufa1,Ndufa6,Ndufb3,Ndufb9,Ndufb10,Ndufs1,Ndufs2,Ndufs3,Ndufv1,Ndufs4,Ndufs8,Ndufv2,Otc,Pcx,Pcca,Pccb,Pck2,Sod2,Star,Tfam,Ucp2,Uqcrb,Uqcrc2,Suclg1,Prepl,Dnm1l,Lrpprc,Wars2,Mlycd,Mto1,Ndufaf3,Uqcrq,Gls2,…
150	Hormone refractory prostate cancer	DisGeNET	0.0435411	Bax,Bcl2,Bid,Casp3,Casp8,Cat,Cpt1a,Timm8a1,Etfa,Gsr,Hadha,Hadhb,Hsd17b4,Maoa,Mcl1,COX2,Pycr1,Prdx2,Tst,Eral1,Sphk2,Mavs,Mul1
152	MITOCHONDRIAL COMPLEX III DEFICIENCY (disorder)	DisGeNET	0.0289107	Bcs1l,Cyc1,CYTB,Uqcrb,Uqcrc2,Uqcrq,Ttc19,Uqcc2,Lyrm7
153	MITOCHONDRIAL COMPLEX III DEFICIENCY (disorder)	DisGeNET	0.0289107	Bcs1l,Cyc1,CYTB,Uqcrb,Uqcrc2,Uqcrq,Ttc19,Uqcc2,Lyrm7
154	Autosomal dominant retinitis pigmentosa	DisGeNET	0.0117412	Tst,Lonp1,Pmpca
154	Congenital Dysplasia Of The Hip	DisGeNET	0.0388454	Dhodh,Hspa9,Pycr1,Aldh18a1,Lonp1,Recql4,Uqcc1,Chdh,Iars2
155	Leigh Syndrome Due To Mitochondrial Complex II Deficiency	DisGeNET	0.0301493	Bcs1l,Cox10,Cox15,Ndufa1,Ndufa2,Ndufa9,Ndufa10,Ndufs1,Ndufs3,Ndufv1,Ndufs4,Ndufs8,Ndufv2,Pdha1,Sdha,Surf1,Suclg1,Sucla2,Sco2,Lrpprc,Fars2,Ethe1,Uqcrq,Taco1,Ttc19,Ptcd3,Foxred1,Iars2,Ndufa12,Nars2,Gfm2,Gfm1,Ndufs7,Pet100,Pet117
155	Leigh Syndrome due to Mitochondrial Complex III Deficiency	DisGeNET	0.0301493	Bcs1l,Cox10,Cox15,Ndufa1,Ndufa2,Ndufa9,Ndufa10,Ndufs1,Ndufs3,Ndufv1,Ndufs4,Ndufs8,Ndufv2,Pdha1,Sdha,Surf1,Suclg1,Sucla2,Sco2,Lrpprc,Fars2,Ethe1,Uqcrq,Taco1,Ttc19,Ptcd3,Foxred1,Iars2,Ndufa12,Nars2,Gfm2,Gfm1,Ndufs7,Pet100,Pet117
155	Leigh Syndrome due to Mitochondrial Complex IV Deficiency	DisGeNET	0.0301493	Bcs1l,Cox10,Cox15,Ndufa1,Ndufa2,Ndufa9,Ndufa10,Ndufs1,Ndufs3,Ndufv1,Ndufs4,Ndufs8,Ndufv2,Pdha1,Sdha,Surf1,Suclg1,Sucla2,Sco2,Lrpprc,Fars2,Ethe1,Uqcrq,Taco1,Ttc19,Ptcd3,Foxred1,Iars2,Ndufa12,Nars2,Gfm2,Gfm1,Ndufs7,Pet100,Pet117
155	Leigh Syndrome due to Mitochondrial Complex V Deficiency	DisGeNET	0.0301493	Bcs1l,Cox10,Cox15,Ndufa1,Ndufa2,Ndufa9,Ndufa10,Ndufs1,Ndufs3,Ndufv1,Ndufs4,Ndufs8,Ndufv2,Pdha1,Sdha,Surf1,Suclg1,Sucla2,Sco2,Lrpprc,Fars2,Ethe1,Uqcrq,Taco1,Ttc19,Ptcd3,Foxred1,Iars2,Ndufa12,Nars2,Gfm2,Gfm1,Ndufs7,Pet100,Pet117
155	Necrotizing encephalopathy, infantile subacute, of Leigh	DisGeNET	0.0301493	Bcs1l,Cox10,Cox15,Ndufa1,Ndufa2,Ndufa9,Ndufa10,Ndufs1,Ndufs3,Ndufv1,Ndufs4,Ndufs8,Ndufv2,Pdha1,Sdha,Surf1,Suclg1,Sucla2,Sco2,Lrpprc,Fars2,Ethe1,Uqcrq,Taco1,Ttc19,Ptcd3,Foxred1,Iars2,Ndufa12,Nars2,Gfm2,Gfm1,Ndufs7,Pet100,Pet117
155	LEIGH SYNDROME DUE TO MITOCHONDRIAL COMPLEX I DEFICIENCY	DisGeNET	0.0348341	Bcs1l,Cox10,Cox15,ND2,ND5,ND6,Ndufa1,Ndufa2,Ndufa9,Ndufa10,Ndufs1,Ndufs3,Ndufv1,Ndufs4,Ndufs8,Ndufv2,Pdha1,Sdha,Surf1,Suclg1,Sucla2,Sco2,Lrpprc,Fars2,Ethe1,Uqcrq,Taco1,Ttc19,Ptcd3,Foxred1,Iars2,Ndufa12,Nars2,Gfm2,Gfm1,Ndufaf6,Ndufs7,Pet100,Pet117
155	Severe intellectual disability	DisGeNET	0.0411667	Acat1,Aco2,Bcs1l,Cox15,Dbt,Dmpk,Echs1,Hmgcl,Letm1,Maoa,ATP6,Ndufa2,Ndufa4,Ndufa9,Ndufa10,Ndufs1,Ndufs2,Ndufs3,Ndufv1,Ndufs4,Ndufs8,Ndufv2,Pdha1,Phyh,Pycr1,Sdha,Surf1,Aldh5a1,Suclg1,Snap29,Wars2,Uqcrq,Pycr2,Taco1,Lipt1,Nsun2,Tmem70,Foxred1,Ndufa12,Ndufaf5,L2hgdh,Ndufaf2,Timm50,Mtfmt,Ndufaf6,Iba57,Ndufs7,Pet100
156	Hypertrichosis	DisGeNET	0.00198532	Acaca,Bcs1l,Cox10,Cox15,Cpox,Echs1,Ndufa2,Ndufa4,Ndufa9,Ndufa10,Ndufb8,Ndufs1,Ndufs2,Ndufs3,Ndufv1,Ndufs4,Ndufs8,Ndufv2,Pdha1,Sdha,Surf1,Sco2,Ndufaf3,Slc25a24,Taco1,Lipt1,Foxred1,Ndufa12,Ndufaf5,Ndufaf2,Sfxn1,Mtfmt,Ndufaf6,Ndufs7,Pet100
156	Mood swings	DisGeNET	0.00216877	Bcs1l,Cox10,Cox15,Sardh,Echs1,Maoa,Ndufa2,Ndufa4,Ndufa9,Ndufa10,Ndufs1,Ndufs2,Ndufs3,Ndufv1,Ndufs4,Ndufs8,Ndufv2,Pdha1,Polg,Prkaca,Sdha,Sod1,Surf1,Taco1,Lipt1,Mtpap,Foxred1,Ndufa12,Ndufaf5,Pank2,Ndufaf2,Mtfmt,Ndufaf6,Nags,Ndufs7,Chchd10,Pet100
156	Nicotinamide adenine dinucleotide coenzyme Q reductase deficiency	DisGeNET	0.00289625	Slc25a10,ND1,ND3,ND5,ND6,Ndufa1,Ndufa2,Ndufa9,Ndufa10,Ndufb3,Ndufb6,Ndufb8,Ndufb9,Ndufb10,Ndufs1,Ndufs2,Ndufs3,Ndufv1,Ndufs4,Ndufs8,Ndufv2,Polg,Sod2,Slc25a27,Pdss1,Mto1,Ndufaf3,Acad9,Ndufaf4,Ndufaf1,Ndufb11,Foxred1,Tmem126b,Ndufa12,Rars2,Elac2,Nubpl,Ndufaf2,Ndufaf6,Ndufs7
156	Progressive cerebellar ataxia	DisGeNET	0.00304217	Auh,Cox15,Echs1,Fxn,Gls,Ndufa2,Ndufa4,Ndufa9,Ndufa10,Ndufs1,Ndufs2,Ndufs3,Ndufv1,Ndufs4,Ndufs8,Ndufv2,Pdha1,Polg,Sdha,Surf1,Aifm1,Slc25a15,Pitrm1,Afg3l2,Pmpca,Coq2,Taco1,Lipt1,Mtpap,Dars2,Foxred1,Ndufa12,Ndufaf5,Ndufaf2,Mgme1,Mars2,Mtfmt,Ndufaf6,Ndufs7,Chchd10,Pet100
156	Severe intellectual disability	DisGeNET	0.00492923	Acat1,Aco2,Bcs1l,Cox15,Dbt,Dmpk,Echs1,Hmgcl,Letm1,Maoa,ATP6,Ndufa2,Ndufa4,Ndufa9,Ndufa10,Ndufs1,Ndufs2,Ndufs3,Ndufv1,Ndufs4,Ndufs8,Ndufv2,Pdha1,Phyh,Pycr1,Sdha,Surf1,Aldh5a1,Suclg1,Snap29,Wars2,Uqcrq,Pycr2,Taco1,Lipt1,Nsun2,Tmem70,Foxred1,Ndufa12,Ndufaf5,L2hgdh,Ndufaf2,Timm50,Mtfmt,Ndufaf6,Iba57,Ndufs7,Pet100
156	Fetal Distress	DisGeNET	0.00709412	Aldh7a1,ND1,ND2,ND3,Ndufa1,Ndufa6,Ndufb3,Ndufb9,Ndufb10,Ndufs1,Ndufs2,Ndufs3,Ndufv1,Ndufs4,Ndufs8,Ndufv2,Ndufaf3,Ndufaf4,Ndufaf1,Timmdc1,Ndufb11,Foxred1,Tmem126b,Ndufaf5,Nubpl,Ndufaf2,Ndufs7
156	Abnormal mitochondria in muscle tissue	DisGeNET	0.00911643	ND1,ND2,ND3,Ndufa1,Ndufa6,Ndufb3,Ndufb9,Ndufb10,Ndufs1,Ndufs2,Ndufs3,Ndufv1,Ndufs4,Ndufs8,Ndufv2,Sdha,Sdhd,Afg3l2,Ndufaf3,Ndufaf4,Ndufaf1,Timmdc1,Ndufb11,Foxred1,Tmem126b,Ndufaf5,Nubpl,Ndufaf2,Ndufs7,Sdhaf1
156	MITOCHONDRIAL COMPLEX I DEFICIENCY	DisGeNET	0.0117412	Slc25a10,ND1,ND2,ND3,ND4,Ndufa1,Ndufa6,Ndufb3,Ndufb8,Ndufb9,Ndufb10,Ndufs1,Ndufs2,Ndufs3,Ndufv1,Ndufs4,Ndufs8,Ndufv2,Aifm1,Sirt3,Ndufaf3,Ndufaf4,Ndufaf1,Timmdc1,Gdap1,Ndufb11,Foxred1,Tmem126b,Elac2,Ndufaf5,Nubpl,Ndufaf2,Ndufaf6,Ndufs7
156	Brain atrophy	DisGeNET	0.0117412	Aldh2,Tspo,Ndufs1,Ndufs2,Ndufv1,Ndufv2,Pcca,Polg,Yme1l1,Trmt5,Nars2,Serac1,Timm50
156	Leigh Syndrome Due To Mitochondrial Complex II Deficiency	DisGeNET	0.0117412	Bcs1l,Cox10,Cox15,Ndufa1,Ndufa2,Ndufa9,Ndufa10,Ndufs1,Ndufs3,Ndufv1,Ndufs4,Ndufs8,Ndufv2,Pdha1,Sdha,Surf1,Suclg1,Sucla2,Sco2,Lrpprc,Fars2,Ethe1,Uqcrq,Taco1,Ttc19,Ptcd3,Foxred1,Iars2,Ndufa12,Nars2,Gfm2,Gfm1,Ndufs7,Pet100,Pet117
156	Leigh Syndrome due to Mitochondrial Complex III Deficiency	DisGeNET	0.0117412	Bcs1l,Cox10,Cox15,Ndufa1,Ndufa2,Ndufa9,Ndufa10,Ndufs1,Ndufs3,Ndufv1,Ndufs4,Ndufs8,Ndufv2,Pdha1,Sdha,Surf1,Suclg1,Sucla2,Sco2,Lrpprc,Fars2,Ethe1,Uqcrq,Taco1,Ttc19,Ptcd3,Foxred1,Iars2,Ndufa12,Nars2,Gfm2,Gfm1,Ndufs7,Pet100,Pet117
156	Leigh Syndrome due to Mitochondrial Complex IV Deficiency	DisGeNET	0.0117412	Bcs1l,Cox10,Cox15,Ndufa1,Ndufa2,Ndufa9,Ndufa10,Ndufs1,Ndufs3,Ndufv1,Ndufs4,Ndufs8,Ndufv2,Pdha1,Sdha,Surf1,Suclg1,Sucla2,Sco2,Lrpprc,Fars2,Ethe1,Uqcrq,Taco1,Ttc19,Ptcd3,Foxred1,Iars2,Ndufa12,Nars2,Gfm2,Gfm1,Ndufs7,Pet100,Pet117
156	Leigh Syndrome due to Mitochondrial Complex V Deficiency	DisGeNET	0.0117412	Bcs1l,Cox10,Cox15,Ndufa1,Ndufa2,Ndufa9,Ndufa10,Ndufs1,Ndufs3,Ndufv1,Ndufs4,Ndufs8,Ndufv2,Pdha1,Sdha,Surf1,Suclg1,Sucla2,Sco2,Lrpprc,Fars2,Ethe1,Uqcrq,Taco1,Ttc19,Ptcd3,Foxred1,Iars2,Ndufa12,Nars2,Gfm2,Gfm1,Ndufs7,Pet100,Pet117
156	Necrotizing encephalopathy, infantile subacute, of Leigh	DisGeNET	0.0117412	Bcs1l,Cox10,Cox15,Ndufa1,Ndufa2,Ndufa9,Ndufa10,Ndufs1,Ndufs3,Ndufv1,Ndufs4,Ndufs8,Ndufv2,Pdha1,Sdha,Surf1,Suclg1,Sucla2,Sco2,Lrpprc,Fars2,Ethe1,Uqcrq,Taco1,Ttc19,Ptcd3,Foxred1,Iars2,Ndufa12,Nars2,Gfm2,Gfm1,Ndufs7,Pet100,Pet117
156	Leukodystrophy	DisGeNET	0.012777	Abat,Abcd1,Cox10,Cox15,Cps1,Sardh,Echs1,Hsd17b4,Hspa9,Hspd1,Mpv17,ND1,ND2,ND3,Ndufa1,Ndufa2,Ndufa4,Ndufa6,Ndufa9,Ndufa10,Ndufb3,Ndufb8,Ndufb9,Ndufb10,Ndufs1,Ndufs2,Ndufs3,Ndufv1,Ndufs4,Ndufs8,Ndufv2,Pcx,Pdha1,Sdha,Sdhb,Surf1,Tufm,Aifm1,Sco2,Abcb6,Prdx5,Ndufaf3,Fbxl4,Nfu1,Ndufaf4,Pycr2,Ndufaf1,Taco1,Glrx5,Timmdc1,Lipt1,Ndufb11,Rmnd1,Dars2,Foxred1,Tmem126b,Ndufa12,Aars2,Ndufaf5,Nubpl,Isca1,Pnpt1,Nd…
156	Retinitis Pigmentosa	DisGeNET	0.0147353	Aldh3a2,Arl2,Aldh7a1,Bcl2,Bcs1l,C1qbp,Cox6b1,Cox7b,Cox8a,Cox10,Cox15,Echs1,Fasn,Gykl1,Hadha,Hadhb,Hadh,Hccs,Idh2,Idh3a,Idh3b,ATP6,CYTB,ND1,ND2,ND3,ND4,ND5,ND6,Ndufa2,Ndufa4,Ndufa9,Ndufa10,Ndufs1,Ndufs2,Ndufs3,Ndufv1,Ndufs4,Ndufs8,Ndufv2,Otc,Pdha1,Phyh,Polg,Aldh18a1,Sco1,Sdha,Sdhb,Sdhd,Sod1,Surf1,Tst,Aifm1,Snap29,Fastkd2,Amacr,Poldip2,Trnt1,Taco1,Lipt1,Cycs,Ndufb11,Foxred1,Ndufa12,Ndufaf5,Pank2,Co…
156	LEIGH SYNDROME DUE TO MITOCHONDRIAL COMPLEX I DEFICIENCY	DisGeNET	0.0147353	Bcs1l,Cox10,Cox15,ND2,ND5,ND6,Ndufa1,Ndufa2,Ndufa9,Ndufa10,Ndufs1,Ndufs3,Ndufv1,Ndufs4,Ndufs8,Ndufv2,Pdha1,Sdha,Surf1,Suclg1,Sucla2,Sco2,Lrpprc,Fars2,Ethe1,Uqcrq,Taco1,Ttc19,Ptcd3,Foxred1,Iars2,Ndufa12,Nars2,Gfm2,Gfm1,Ndufaf6,Ndufs7,Pet100,Pet117
156	Strabismus	DisGeNET	0.0160775	Abcb7,Aco2,Slc25a4,Aldh7a1,Bcs1l,Comt,Cox10,Cox15,Dguok,Dhodh,Sardh,Dmpk,Echs1,Gykl1,Hsd17b4,Hspd1,Letm1,Mdh2,ND1,ND2,ND3,Ndufa1,Ndufa2,Ndufa4,Ndufa6,Ndufa9,Ndufa10,Ndufb3,Ndufb9,Ndufb10,Ndufs1,Ndufs2,Ndufs3,Ndufv1,Ndufs4,Ndufs8,Ndufv2,Opa1,Pdha1,Pycr1,Aldh18a1,Sdha,Surf1,Aldh5a1,Pex11b,Sucla2,Lonp1,Recql4,Dnm1l,Lrpprc,Fars2,Yme1l1,Dhx30,Ndufaf3,Hibch,Ndufaf4,Slc25a24,Yars2,Ndufaf1,Taco1,Glrx5,Ti…
156	Dysarthria	DisGeNET	0.0177311	Abcb7,Aldh3a2,Slc25a4,Auh,Bcs1l,Cox10,Cox15,Timm8a1,Echs1,Fxn,Hsd17b10,Hmgcl,ATP6,COX1,COX2,COX3,ND1,ND4,ND5,ND6,Ndufa2,Ndufa4,Ndufa9,Ndufa10,Ndufs1,Ndufs2,Ndufs3,Ndufv1,Ndufs4,Ndufs8,Ndufv2,Pdha1,Polg,Aldh18a1,Sdha,Spg7,Spr,Surf1,Tk2,Top3a,Tmem11,Sco2,Dnm1l,Fars2,Afg3l2,Polg2,Rpia,Pmpca,Amacr,Pnkd,Coq2,Pnpla8,Mecr,Taco1,Glrx5,Lipt1,Nsun2,Ttc19,Mtpap,Dars2,Vps13d,Foxred1,Ndufa12,Aars2,Coa7,Ndufaf…
156	Leigh Disease	DisGeNET	0.0211093	Bcs1l,Cox4i1,Cox8a,Cox10,Cox15,Cpox,Crat,Dld,Echs1,Fxn,ATP6,COX1,COX3,CYTB,ND1,ND2,ND3,ND4,ND5,ND6,Ndufa1,Ndufa2,Ndufa5,Ndufa9,Ndufa10,Ndufs1,Ndufs2,Ndufs3,Ndufv1,Ndufs4,Ndufs8,Ndufv2,Ogdh,Pdha1,Pdhb,Polg,Sdha,Sdhb,Sod2,Surf1,Txnrd1,Pdhx,Suclg1,Sucla2,Cox5a,Sco2,Tsfm,Lrpprc,Fars2,Lias,Ethe1,Mto1,Ndufaf3,Hibch,Uqcrq,Ndufaf4,Coq4,Taco1,Timmdc1,Lipt1,Pdp1,Ttc19,Ptcd3,Parl,Foxred1,Trmu,Iars2,Ndufa12,…
156	Hypoglycemia	DisGeNET	0.021652	Acadl,Acadm,Acadsb,Acadvl,Acat1,Auh,Bckdha,Bckdhb,Bcs1l,Bid,Car5a,Slc25a20,Cpt1a,Cpt2,Dbt,Timm8a1,Dguok,Dld,Etfa,Etfb,Etfdh,Gcdh,Gykl1,Glud1,Gsr,Hsd17b10,Hadha,Hadh,Hmgcl,Hmgcs2,Mpv17,ND1,ND2,ND3,Ndufa1,Ndufa6,Ndufb3,Ndufb9,Ndufb10,Ndufs1,Ndufs2,Ndufs3,Ndufv1,Ndufs4,Ndufs8,Ndufv2,Otc,Pcx,Pcca,Pccb,Pck2,Sod2,Star,Tfam,Ucp2,Uqcrb,Uqcrc2,Suclg1,Prepl,Dnm1l,Lrpprc,Wars2,Mlycd,Mto1,Ndufaf3,Uqcrq,Gls2,…
156	Cerebral atrophy	DisGeNET	0.0227571	Aldh2,Auh,Bcs1l,Tspo,Cyp27a1,Dguok,Dmpk,Fh1,Ndufa2,Ndufa9,Ndufs1,Ndufs2,Ndufv1,Ndufv2,Pcca,Pccb,Pdha1,Polg,Tk2,Suclg1,Sucla2,Aifm1,Dnm1l,Wars2,Fars2,Yme1l1,Dhx30,Prdx5,Pars2,Fbxl4,Coq2,Htra2,Trit1,Nsun2,Ttc19,Dars2,Coq9,Rars2,Trmt5,Cars2,Nars2,Slc25a22,Clpb,Serac1,Lyrm7,Timm50,Mars2,Nadk2,Iba57
156	Anemia	DisGeNET	0.0246866	Abcb7,Agxt,Ak2,Alas2,Slc25a5,Bcl2,Car5a,Casp3,Cat,Cox6b1,Cox8a,Cox10,Cox15,Dbi,Decr1,Echs1,Fabp1,Fech,Fhit,Gpx1,Gsr,Hmgcl,Idh2,Maob,CYTB,Mtx1,Ndufa2,Ndufa4,Ndufa9,Ndufa10,Ndufb8,Ndufs1,Ndufs2,Ndufs3,Ndufv1,Ndufs4,Ndufs8,Ndufv2,Pcca,Pccb,Pdha1,Polg,Ppox,Acsm3,Sco1,Sdha,Sdhb,Sdhc,Shmt2,Sod1,Sod2,Spg7,Surf1,Uqcrfs1,Recql4,Mfn2,Sco2,Bcl2l11,Aass,Slc25a13,Txnrd2,Fastkd2,Ndufaf3,Acad8,Bbc3,Coq2,Ak3,Yar…
156	Blepharoptosis	DisGeNET	0.024861	Slc25a4,Bcs1l,C1qbp,Comt,Cox6b1,Cox8a,Cox10,Cox15,Dguok,Dlat,Dna2,Echs1,Gfer,Letm1,Maoa,Mpv17,COX1,COX2,COX3,ND1,ND2,ND3,ND4,ND5,ND6,Ndufa1,Ndufa2,Ndufa4,Ndufa6,Ndufa9,Ndufa10,Ndufb3,Ndufb9,Ndufb10,Ndufs1,Ndufs2,Ndufs3,Ndufv1,Ndufs4,Ndufs8,Ndufv2,Opa1,Pdha1,Phyh,Polg,Sco1,Sdha,Sdhd,Spr,Surf1,Tk2,Top3a,Pex11b,Sucla2,Lonp1,Prepl,Sco2,Dnm1l,Micu1,Slc30a9,Fars2,Afg3l2,Polg2,Fastkd2,Ndufaf3,Pars2,Coq2…
156	Ptosis	DisGeNET	0.024861	Slc25a4,Bcl2,Bcs1l,C1qbp,Comt,Cox6b1,Cox8a,Cox10,Cox15,Dguok,Dlat,Dna2,Echs1,Gfer,Letm1,Maoa,COX1,COX2,COX3,ND1,ND2,ND3,ND4,ND5,ND6,Ndufa1,Ndufa2,Ndufa4,Ndufa6,Ndufa9,Ndufa10,Ndufb3,Ndufb9,Ndufb10,Ndufs1,Ndufs2,Ndufs3,Ndufv1,Ndufs4,Ndufs8,Ndufv2,Opa1,Pdha1,Phyh,Polg,Sco1,Sdha,Sdhd,Spr,Surf1,Tk2,Top3a,Pex11b,Sucla2,Lonp1,Prepl,Sco2,Dnm1l,Micu1,Slc30a9,Fars2,Afg3l2,Polg2,Fastkd2,Ndufaf3,Pars2,Coq2,…
156	Mitochondrial Encephalopathy, Lactic Acidosis and Stroke-like episodes (MELAS syndrome)	DisGeNET	0.0257566	Mpv17,ND5,Ndufa1,Ndufs2,Ndufv1
156	Nystagmus	DisGeNET	0.0379851	Abcb7,Aco2,Slc25a4,Bcs1l,Slc25a20,Cox8a,Cox10,Cox15,Dguok,Dlat,Echs1,Fdxr,Fxn,Hsd17b10,Hsd17b4,Hspd1,Idh3a,Idh3b,Letm1,Mpv17,ATP6,ND1,ND2,ND3,ND4,ND5,ND6,Ndufa1,Ndufa2,Ndufa4,Ndufa6,Ndufa9,Ndufa10,Ndufb3,Ndufb8,Ndufb9,Ndufb10,Ndufs1,Ndufs2,Ndufs3,Ndufv1,Ndufs4,Ndufs8,Ndufv2,Opa1,Pdha1,Phyh,Polg,Sdha,Sdhb,Sdhd,Spg7,Surf1,Tufm,Pex11b,Lonp1,Recql4,Sco2,Dnm1l,Wars2,Afg3l2,Rpia,Pmpca,Prdx5,Ndufaf3,Par…
156	Hypertrophic Cardiomyopathy	DisGeNET	0.0388454	Acaca,Acadl,Acadvl,Slc25a4,Bcl2,Bcs1l,Casp3,Cox6b1,Cox7b,Cox8a,Cox10,Cox15,Cpt1a,Cyp11b1,Dld,Sardh,Dmpk,Echs1,Fasn,Fxn,Hsd17b10,Hadha,Hadh,Hccs,Hspd1,Idh2,Mipep,ATP6,COX1,COX2,COX3,CYTB,ND1,ND2,ND3,ND4,ND5,ND6,Ndufa1,Ndufa2,Ndufa4,Ndufa6,Ndufa9,Ndufa10,Ndufb3,Ndufb8,Ndufb9,Ndufb10,Ndufs1,Ndufs2,Ndufs3,Ndufv1,Ndufs4,Ndufs8,Ndufv2,Opa1,Pdha1,Slc25a3,Sco1,Sdha,Sdhb,Sdhd,Star,Surf1,Suclg1,Sco2,Htatip…
156	Optic Atrophy	DisGeNET	0.0391484	Aco2,Agxt,Auh,Bcl2,Bcs1l,Comt,Cox6b1,Cox8a,Cox10,Cox15,Decr1,Timm8a1,Dguok,Sardh,Dmpk,Echs1,Fdxr,Fh1,Fxn,Hsd17b10,Idh3a,Idh3b,Letm1,Mipep,ATP6,COX1,COX2,COX3,CYTB,ND1,ND2,ND3,ND4,ND4L,ND5,ND6,Ndufa2,Ndufa4,Ndufa9,Ndufa10,Ndufb8,Ndufs1,Ndufs2,Ndufs3,Ndufv1,Ndufs4,Ndufs8,Ndufv2,Oat,Opa1,Pdha1,Polg,Sco1,Sdha,Sdhd,Spg7,Ssbp1,Surf1,Tk2,Txnrd1,Pdhx,Pex11b,Snap29,Recql4,Mfn2,Sco2,Dnm1l,Tsfm,Wars2,Micu1,…
156	Mitochondrial Encephalomyopathies	DisGeNET	0.0482398	Gfer,ATP6,COX2,CYTB,ND5,Ndufa1,Ndufs2,Ndufs4,Ndufv2,Opa1,Tfam,Tk2,Vdac1,Suclg1,Sucla2,Aifm1,Sco2,Dnm1l,Fars2,Fastkd2,Fbxl4,Acad9,Ndufaf4,Coq4,Ndufb11,Ttc19,Tmem70,Foxred1,Rars2,Vars2,Aars2,Tars2,Mtfmt,Tmem65,Rnaseh1,Slc25a42
160	Osteoarthrosis Deformans	DisGeNET	0.0134549	Ak4,Etfa,Gls,Hadha,Idh2,Idh3a,Ndufv1,Ndufs8,Opa1,Pdha1,Sdha,Sod2,Txnrd1,Vdac2,Trap1,Acaa2,Txnrd2,Immt,Hibch,Isoc2a,Gstk1
160	Malignant neoplasm of brain	DisGeNET	0.0232287	Bcl2,C1qbp,Casp3,Fdps,Idh2,Mcl1,Acsm3,Sod2,Spg7,Abcb6,Pdp1,Gstk1
160	Carcinoma of larynx	DisGeNET	0.0259709	Bcl2,Casp3,Cat,Gpx1,Hadh,Mcl1,COX2,Nthl1,Ogg1,Sod2,Park7,Fundc1,Gstk1
160	Methylmalonic aciduria	DisGeNET	0.0259709	Gpd2,Aldh6a1,Sod2,Spr,Suclg2,Suclg1,Sucla2,Mmadhc,Cycs,Mcee,Mmaa,Acsf3,Mmab
160	Aortic Valve Insufficiency	DisGeNET	0.0296947	Apex1,Cat,Idh2,Mcl1,Sod2,Phb2,Pdss1,Poldip2,Sars2,Qrsl1,Pink1,Pank2,Gstk1,D2hgdh
160	Malignant neoplasm of larynx	DisGeNET	0.0296947	Acaca,Aldh2,Bax,Bcl2,Casp3,Cat,Gpx1,Hadh,Mcl1,COX2,Ogg1,Sod2,Fundc1,Gstk1
160	Adult Acute Myeloblastic Leukemia	DisGeNET	0.0420228	Bcl2,Cpox,Idh2,Mrpl28,Gstk1
160	Brain Tumor, Primary	DisGeNET	0.0420228	Casp8,Casp9,Fhit,Idh2,Sod2
160	Bronchial Hyperreactivity	DisGeNET	0.0420228	Casp8,Ndufa2,Sod2,Uqcrc2,Gstk1
160	Exudative age-related macular degeneration	DisGeNET	0.0420228	Gstz1,Sod2,Tomm40,Acad10,Gstk1
160	Cerebral Palsy	DisGeNET	0.0435347	Bcl2,Casp3,Cat,Cyp24a1,Gpx1,Gsr,Idh2,Mipep,COX1,COX2,Pdha1,Sod2,Spr,Tomm40,Mecr,Pif1,Acsm1,Acsm2,Gstk1
160	Childhood Medulloblastoma	DisGeNET	0.048825	Apex1,Bax,Bcl2,Casp3,Casp8,Casp9,Fech,Gsr,Idh2,Mcl1,COX2,Polb,Sod2,Spg7,Slc25a16,Lrpprc,Prdx3,Poldip2,Dnajc15,Chpt1,Gstk1
164	Global developmental delay	DisGeNET	0.00535843	Abat,Abcb7,Acadm,Acads,Acadsb,Aco2,Abcd1,Nudt2,Aldh7a1,Auh,Bcs1l,Slc25a20,Cat,Comt,Cox6b1,Cox7b,Cox8a,Cox10,Cox15,Cps1,Cyp27a1,Dlat,Dld,Sardh,Dna2,Echs1,Fh1,Gatm,Gcdh,Gfer,Gykl1,Gls,Glud1,Got2,Gpd2,Hsd17b10,Hadha,Hadhb,Hccs,Hsd17b4,Hspd1,Idh2,Ivd,Letm1,Maoa,Maob,Mdh2,Mipep,Aldh6a1,Mpv17,ATP6,COX2,ND1,ND2,ND3,Ndufa1,Ndufa2,Ndufa4,Ndufa6,Ndufa9,Ndufa10,Ndufb3,Ndufb8,Ndufb9,Ndufb10,Ndufs1,Ndufs2,Ndu…
164	Nystagmus	DisGeNET	0.0205947	Abcb7,Aco2,Slc25a4,Bcs1l,Slc25a20,Cox8a,Cox10,Cox15,Dguok,Dlat,Echs1,Fdxr,Fxn,Hsd17b10,Hsd17b4,Hspd1,Idh3a,Idh3b,Letm1,Mpv17,ATP6,ND1,ND2,ND3,ND4,ND5,ND6,Ndufa1,Ndufa2,Ndufa4,Ndufa6,Ndufa9,Ndufa10,Ndufb3,Ndufb8,Ndufb9,Ndufb10,Ndufs1,Ndufs2,Ndufs3,Ndufv1,Ndufs4,Ndufs8,Ndufv2,Opa1,Pdha1,Phyh,Polg,Sdha,Sdhb,Sdhd,Spg7,Surf1,Tufm,Pex11b,Lonp1,Recql4,Sco2,Dnm1l,Wars2,Afg3l2,Rpia,Pmpca,Prdx5,Ndufaf3,Par…
164	Neonatal Hypotonia	DisGeNET	0.0218105	Abat,Cpt2,Dlat,Gls,Hadh,Hsd17b4,Letm1,Sdha,Sdhd,Tufm,Pdhx,Prepl,Sco2,Tsfm,Mrps16,Coq4,Pdss2,Lyrm4,Slc25a22,Clpb,Uqcc2,Timm50,Ears2,Glyctk,Nadk2,Sdhaf1
164	Clumsiness - motor delay	DisGeNET	0.0330343	Acadsb,Acat1,Auh,Cat,Cox6b1,Cox8a,Cox10,Crat,Cyp27b1,Sardh,Hadha,Hadhb,Hadh,Letm1,Opa1,Pdk3,Aldh18a1,Sco1,Sdha,Sdhb,Sdhd,Spr,Tk2,Aldh5a1,Lonp1,Prepl,Sco2,Coq7,Wars2,Micu1,Lias,Fastkd2,Hibch,Coq2,Taco1,Gdap1,Nsun2,Mtpap,Dars2,Iars2,Agk,Nif3l1,Cox14,Gfm1,Cox20,Sdhaf1,Pet100
167	Nicotinamide adenine dinucleotide coenzyme Q reductase deficiency	DisGeNET	2.47365e-05	Slc25a10,ND1,ND3,ND5,ND6,Ndufa1,Ndufa2,Ndufa9,Ndufa10,Ndufb3,Ndufb6,Ndufb8,Ndufb9,Ndufb10,Ndufs1,Ndufs2,Ndufs3,Ndufv1,Ndufs4,Ndufs8,Ndufv2,Polg,Sod2,Slc25a27,Pdss1,Mto1,Ndufaf3,Acad9,Ndufaf4,Ndufaf1,Ndufb11,Foxred1,Tmem126b,Ndufa12,Rars2,Elac2,Nubpl,Ndufaf2,Ndufaf6,Ndufs7
167	MITOCHONDRIAL COMPLEX I DEFICIENCY	DisGeNET	2.47365e-05	Slc25a10,ND1,ND2,ND3,ND4,Ndufa1,Ndufa6,Ndufb3,Ndufb8,Ndufb9,Ndufb10,Ndufs1,Ndufs2,Ndufs3,Ndufv1,Ndufs4,Ndufs8,Ndufv2,Aifm1,Sirt3,Ndufaf3,Ndufaf4,Ndufaf1,Timmdc1,Gdap1,Ndufb11,Foxred1,Tmem126b,Elac2,Ndufaf5,Nubpl,Ndufaf2,Ndufaf6,Ndufs7
167	Hypertrichosis	DisGeNET	2.99742e-05	Acaca,Bcs1l,Cox10,Cox15,Cpox,Echs1,Ndufa2,Ndufa4,Ndufa9,Ndufa10,Ndufb8,Ndufs1,Ndufs2,Ndufs3,Ndufv1,Ndufs4,Ndufs8,Ndufv2,Pdha1,Sdha,Surf1,Sco2,Ndufaf3,Slc25a24,Taco1,Lipt1,Foxred1,Ndufa12,Ndufaf5,Ndufaf2,Sfxn1,Mtfmt,Ndufaf6,Ndufs7,Pet100
167	Fetal Distress	DisGeNET	8.22252e-05	Aldh7a1,ND1,ND2,ND3,Ndufa1,Ndufa6,Ndufb3,Ndufb9,Ndufb10,Ndufs1,Ndufs2,Ndufs3,Ndufv1,Ndufs4,Ndufs8,Ndufv2,Ndufaf3,Ndufaf4,Ndufaf1,Timmdc1,Ndufb11,Foxred1,Tmem126b,Ndufaf5,Nubpl,Ndufaf2,Ndufs7
167	Abnormal mitochondria in muscle tissue	DisGeNET	0.000221911	ND1,ND2,ND3,Ndufa1,Ndufa6,Ndufb3,Ndufb9,Ndufb10,Ndufs1,Ndufs2,Ndufs3,Ndufv1,Ndufs4,Ndufs8,Ndufv2,Sdha,Sdhd,Afg3l2,Ndufaf3,Ndufaf4,Ndufaf1,Timmdc1,Ndufb11,Foxred1,Tmem126b,Ndufaf5,Nubpl,Ndufaf2,Ndufs7,Sdhaf1
167	Leukodystrophy	DisGeNET	0.000477726	Abat,Abcd1,Cox10,Cox15,Cps1,Sardh,Echs1,Hsd17b4,Hspa9,Hspd1,Mpv17,ND1,ND2,ND3,Ndufa1,Ndufa2,Ndufa4,Ndufa6,Ndufa9,Ndufa10,Ndufb3,Ndufb8,Ndufb9,Ndufb10,Ndufs1,Ndufs2,Ndufs3,Ndufv1,Ndufs4,Ndufs8,Ndufv2,Pcx,Pdha1,Sdha,Sdhb,Surf1,Tufm,Aifm1,Sco2,Abcb6,Prdx5,Ndufaf3,Fbxl4,Nfu1,Ndufaf4,Pycr2,Ndufaf1,Taco1,Glrx5,Timmdc1,Lipt1,Ndufb11,Rmnd1,Dars2,Foxred1,Tmem126b,Ndufa12,Aars2,Ndufaf5,Nubpl,Isca1,Pnpt1,Nd…
167	Mood swings	DisGeNET	0.0012526	Bcs1l,Cox10,Cox15,Sardh,Echs1,Maoa,Ndufa2,Ndufa4,Ndufa9,Ndufa10,Ndufs1,Ndufs2,Ndufs3,Ndufv1,Ndufs4,Ndufs8,Ndufv2,Pdha1,Polg,Prkaca,Sdha,Sod1,Surf1,Taco1,Lipt1,Mtpap,Foxred1,Ndufa12,Ndufaf5,Pank2,Ndufaf2,Mtfmt,Ndufaf6,Nags,Ndufs7,Chchd10,Pet100
167	Severe intellectual disability	DisGeNET	0.00216877	Acat1,Aco2,Bcs1l,Cox15,Dbt,Dmpk,Echs1,Hmgcl,Letm1,Maoa,ATP6,Ndufa2,Ndufa4,Ndufa9,Ndufa10,Ndufs1,Ndufs2,Ndufs3,Ndufv1,Ndufs4,Ndufs8,Ndufv2,Pdha1,Phyh,Pycr1,Sdha,Surf1,Aldh5a1,Suclg1,Snap29,Wars2,Uqcrq,Pycr2,Taco1,Lipt1,Nsun2,Tmem70,Foxred1,Ndufa12,Ndufaf5,L2hgdh,Ndufaf2,Timm50,Mtfmt,Ndufaf6,Iba57,Ndufs7,Pet100
167	Hypertrophic Cardiomyopathy	DisGeNET	0.00233923	Acaca,Acadl,Acadvl,Slc25a4,Bcl2,Bcs1l,Casp3,Cox6b1,Cox7b,Cox8a,Cox10,Cox15,Cpt1a,Cyp11b1,Dld,Sardh,Dmpk,Echs1,Fasn,Fxn,Hsd17b10,Hadha,Hadh,Hccs,Hspd1,Idh2,Mipep,ATP6,COX1,COX2,COX3,CYTB,ND1,ND2,ND3,ND4,ND5,ND6,Ndufa1,Ndufa2,Ndufa4,Ndufa6,Ndufa9,Ndufa10,Ndufb3,Ndufb8,Ndufb9,Ndufb10,Ndufs1,Ndufs2,Ndufs3,Ndufv1,Ndufs4,Ndufs8,Ndufv2,Opa1,Pdha1,Slc25a3,Sco1,Sdha,Sdhb,Sdhd,Star,Surf1,Suclg1,Sco2,Htatip…
167	Strabismus	DisGeNET	0.00322313	Abcb7,Aco2,Slc25a4,Aldh7a1,Bcs1l,Comt,Cox10,Cox15,Dguok,Dhodh,Sardh,Dmpk,Echs1,Gykl1,Hsd17b4,Hspd1,Letm1,Mdh2,ND1,ND2,ND3,Ndufa1,Ndufa2,Ndufa4,Ndufa6,Ndufa9,Ndufa10,Ndufb3,Ndufb9,Ndufb10,Ndufs1,Ndufs2,Ndufs3,Ndufv1,Ndufs4,Ndufs8,Ndufv2,Opa1,Pdha1,Pycr1,Aldh18a1,Sdha,Surf1,Aldh5a1,Pex11b,Sucla2,Lonp1,Recql4,Dnm1l,Lrpprc,Fars2,Yme1l1,Dhx30,Ndufaf3,Hibch,Ndufaf4,Slc25a24,Yars2,Ndufaf1,Taco1,Glrx5,Ti…
167	Nystagmus	DisGeNET	0.00477161	Abcb7,Aco2,Slc25a4,Bcs1l,Slc25a20,Cox8a,Cox10,Cox15,Dguok,Dlat,Echs1,Fdxr,Fxn,Hsd17b10,Hsd17b4,Hspd1,Idh3a,Idh3b,Letm1,Mpv17,ATP6,ND1,ND2,ND3,ND4,ND5,ND6,Ndufa1,Ndufa2,Ndufa4,Ndufa6,Ndufa9,Ndufa10,Ndufb3,Ndufb8,Ndufb9,Ndufb10,Ndufs1,Ndufs2,Ndufs3,Ndufv1,Ndufs4,Ndufs8,Ndufv2,Opa1,Pdha1,Phyh,Polg,Sdha,Sdhb,Sdhd,Spg7,Surf1,Tufm,Pex11b,Lonp1,Recql4,Sco2,Dnm1l,Wars2,Afg3l2,Rpia,Pmpca,Prdx5,Ndufaf3,Par…
167	Progressive cerebellar ataxia	DisGeNET	0.00717327	Auh,Cox15,Echs1,Fxn,Gls,Ndufa2,Ndufa4,Ndufa9,Ndufa10,Ndufs1,Ndufs2,Ndufs3,Ndufv1,Ndufs4,Ndufs8,Ndufv2,Pdha1,Polg,Sdha,Surf1,Aifm1,Slc25a15,Pitrm1,Afg3l2,Pmpca,Coq2,Taco1,Lipt1,Mtpap,Dars2,Foxred1,Ndufa12,Ndufaf5,Ndufaf2,Mgme1,Mars2,Mtfmt,Ndufaf6,Ndufs7,Chchd10,Pet100
167	Hypoglycemia	DisGeNET	0.00732125	Acadl,Acadm,Acadsb,Acadvl,Acat1,Auh,Bckdha,Bckdhb,Bcs1l,Bid,Car5a,Slc25a20,Cpt1a,Cpt2,Dbt,Timm8a1,Dguok,Dld,Etfa,Etfb,Etfdh,Gcdh,Gykl1,Glud1,Gsr,Hsd17b10,Hadha,Hadh,Hmgcl,Hmgcs2,Mpv17,ND1,ND2,ND3,Ndufa1,Ndufa6,Ndufb3,Ndufb9,Ndufb10,Ndufs1,Ndufs2,Ndufs3,Ndufv1,Ndufs4,Ndufs8,Ndufv2,Otc,Pcx,Pcca,Pccb,Pck2,Sod2,Star,Tfam,Ucp2,Uqcrb,Uqcrc2,Suclg1,Prepl,Dnm1l,Lrpprc,Wars2,Mlycd,Mto1,Ndufaf3,Uqcrq,Gls2,…
167	Leigh Syndrome Due To Mitochondrial Complex II Deficiency	DisGeNET	0.00911643	Bcs1l,Cox10,Cox15,Ndufa1,Ndufa2,Ndufa9,Ndufa10,Ndufs1,Ndufs3,Ndufv1,Ndufs4,Ndufs8,Ndufv2,Pdha1,Sdha,Surf1,Suclg1,Sucla2,Sco2,Lrpprc,Fars2,Ethe1,Uqcrq,Taco1,Ttc19,Ptcd3,Foxred1,Iars2,Ndufa12,Nars2,Gfm2,Gfm1,Ndufs7,Pet100,Pet117
167	Leigh Syndrome due to Mitochondrial Complex III Deficiency	DisGeNET	0.00911643	Bcs1l,Cox10,Cox15,Ndufa1,Ndufa2,Ndufa9,Ndufa10,Ndufs1,Ndufs3,Ndufv1,Ndufs4,Ndufs8,Ndufv2,Pdha1,Sdha,Surf1,Suclg1,Sucla2,Sco2,Lrpprc,Fars2,Ethe1,Uqcrq,Taco1,Ttc19,Ptcd3,Foxred1,Iars2,Ndufa12,Nars2,Gfm2,Gfm1,Ndufs7,Pet100,Pet117
167	Leigh Syndrome due to Mitochondrial Complex IV Deficiency	DisGeNET	0.00911643	Bcs1l,Cox10,Cox15,Ndufa1,Ndufa2,Ndufa9,Ndufa10,Ndufs1,Ndufs3,Ndufv1,Ndufs4,Ndufs8,Ndufv2,Pdha1,Sdha,Surf1,Suclg1,Sucla2,Sco2,Lrpprc,Fars2,Ethe1,Uqcrq,Taco1,Ttc19,Ptcd3,Foxred1,Iars2,Ndufa12,Nars2,Gfm2,Gfm1,Ndufs7,Pet100,Pet117
167	Leigh Syndrome due to Mitochondrial Complex V Deficiency	DisGeNET	0.00911643	Bcs1l,Cox10,Cox15,Ndufa1,Ndufa2,Ndufa9,Ndufa10,Ndufs1,Ndufs3,Ndufv1,Ndufs4,Ndufs8,Ndufv2,Pdha1,Sdha,Surf1,Suclg1,Sucla2,Sco2,Lrpprc,Fars2,Ethe1,Uqcrq,Taco1,Ttc19,Ptcd3,Foxred1,Iars2,Ndufa12,Nars2,Gfm2,Gfm1,Ndufs7,Pet100,Pet117
167	Necrotizing encephalopathy, infantile subacute, of Leigh	DisGeNET	0.00911643	Bcs1l,Cox10,Cox15,Ndufa1,Ndufa2,Ndufa9,Ndufa10,Ndufs1,Ndufs3,Ndufv1,Ndufs4,Ndufs8,Ndufv2,Pdha1,Sdha,Surf1,Suclg1,Sucla2,Sco2,Lrpprc,Fars2,Ethe1,Uqcrq,Taco1,Ttc19,Ptcd3,Foxred1,Iars2,Ndufa12,Nars2,Gfm2,Gfm1,Ndufs7,Pet100,Pet117
167	Failure to Thrive	DisGeNET	0.0105675	Acads,Aco2,Agxt,Ak2,Abcd1,Slc25a4,Auh,Bcs1l,Casp8,Comt,Cox6b1,Cox7b,Cox8a,Cox10,Cox15,Cps1,Cyp11a1,Cyp11b1,Cyp24a1,Cyp27b1,Dguok,Dld,Echs1,Fh1,Gatm,Gcdh,Got2,Hadha,Hadhb,Hadh,Hccs,Hsd17b4,Letm1,Mdh2,Mipep,Mpv17,ATP6,ND1,ND2,ND3,ND4,ND5,ND6,Ndufa1,Ndufa2,Ndufa4,Ndufa6,Ndufa9,Ndufa10,Ndufb3,Ndufb8,Ndufb9,Ndufb10,Ndufs1,Ndufs2,Ndufs3,Ndufv1,Ndufs4,Ndufs8,Ndufv2,Otc,Pcca,Pccb,Pdha1,Slc25a3,Polg,Pycr1…
167	Global developmental delay	DisGeNET	0.0117412	Abat,Abcb7,Acadm,Acads,Acadsb,Aco2,Abcd1,Nudt2,Aldh7a1,Auh,Bcs1l,Slc25a20,Cat,Comt,Cox6b1,Cox7b,Cox8a,Cox10,Cox15,Cps1,Cyp27a1,Dlat,Dld,Sardh,Dna2,Echs1,Fh1,Gatm,Gcdh,Gfer,Gykl1,Gls,Glud1,Got2,Gpd2,Hsd17b10,Hadha,Hadhb,Hccs,Hsd17b4,Hspd1,Idh2,Ivd,Letm1,Maoa,Maob,Mdh2,Mipep,Aldh6a1,Mpv17,ATP6,COX2,ND1,ND2,ND3,Ndufa1,Ndufa2,Ndufa4,Ndufa6,Ndufa9,Ndufa10,Ndufb3,Ndufb8,Ndufb9,Ndufb10,Ndufs1,Ndufs2,Ndu…
167	Blepharoptosis	DisGeNET	0.0121364	Slc25a4,Bcs1l,C1qbp,Comt,Cox6b1,Cox8a,Cox10,Cox15,Dguok,Dlat,Dna2,Echs1,Gfer,Letm1,Maoa,Mpv17,COX1,COX2,COX3,ND1,ND2,ND3,ND4,ND5,ND6,Ndufa1,Ndufa2,Ndufa4,Ndufa6,Ndufa9,Ndufa10,Ndufb3,Ndufb9,Ndufb10,Ndufs1,Ndufs2,Ndufs3,Ndufv1,Ndufs4,Ndufs8,Ndufv2,Opa1,Pdha1,Phyh,Polg,Sco1,Sdha,Sdhd,Spr,Surf1,Tk2,Top3a,Pex11b,Sucla2,Lonp1,Prepl,Sco2,Dnm1l,Micu1,Slc30a9,Fars2,Afg3l2,Polg2,Fastkd2,Ndufaf3,Pars2,Coq2…
167	Ptosis	DisGeNET	0.0121364	Slc25a4,Bcl2,Bcs1l,C1qbp,Comt,Cox6b1,Cox8a,Cox10,Cox15,Dguok,Dlat,Dna2,Echs1,Gfer,Letm1,Maoa,COX1,COX2,COX3,ND1,ND2,ND3,ND4,ND5,ND6,Ndufa1,Ndufa2,Ndufa4,Ndufa6,Ndufa9,Ndufa10,Ndufb3,Ndufb9,Ndufb10,Ndufs1,Ndufs2,Ndufs3,Ndufv1,Ndufs4,Ndufs8,Ndufv2,Opa1,Pdha1,Phyh,Polg,Sco1,Sdha,Sdhd,Spr,Surf1,Tk2,Top3a,Pex11b,Sucla2,Lonp1,Prepl,Sco2,Dnm1l,Micu1,Slc30a9,Fars2,Afg3l2,Polg2,Fastkd2,Ndufaf3,Pars2,Coq2,…
167	Leigh Disease	DisGeNET	0.0128255	Bcs1l,Cox4i1,Cox8a,Cox10,Cox15,Cpox,Crat,Dld,Echs1,Fxn,ATP6,COX1,COX3,CYTB,ND1,ND2,ND3,ND4,ND5,ND6,Ndufa1,Ndufa2,Ndufa5,Ndufa9,Ndufa10,Ndufs1,Ndufs2,Ndufs3,Ndufv1,Ndufs4,Ndufs8,Ndufv2,Ogdh,Pdha1,Pdhb,Polg,Sdha,Sdhb,Sod2,Surf1,Txnrd1,Pdhx,Suclg1,Sucla2,Cox5a,Sco2,Tsfm,Lrpprc,Fars2,Lias,Ethe1,Mto1,Ndufaf3,Hibch,Uqcrq,Ndufaf4,Coq4,Taco1,Timmdc1,Lipt1,Pdp1,Ttc19,Ptcd3,Parl,Foxred1,Trmu,Iars2,Ndufa12,…
167	LEIGH SYNDROME DUE TO MITOCHONDRIAL COMPLEX I DEFICIENCY	DisGeNET	0.0144196	Bcs1l,Cox10,Cox15,ND2,ND5,ND6,Ndufa1,Ndufa2,Ndufa9,Ndufa10,Ndufs1,Ndufs3,Ndufv1,Ndufs4,Ndufs8,Ndufv2,Pdha1,Sdha,Surf1,Suclg1,Sucla2,Sco2,Lrpprc,Fars2,Ethe1,Uqcrq,Taco1,Ttc19,Ptcd3,Foxred1,Iars2,Ndufa12,Nars2,Gfm2,Gfm1,Ndufaf6,Ndufs7,Pet100,Pet117
167	Retinitis Pigmentosa	DisGeNET	0.0235406	Aldh3a2,Arl2,Aldh7a1,Bcl2,Bcs1l,C1qbp,Cox6b1,Cox7b,Cox8a,Cox10,Cox15,Echs1,Fasn,Gykl1,Hadha,Hadhb,Hadh,Hccs,Idh2,Idh3a,Idh3b,ATP6,CYTB,ND1,ND2,ND3,ND4,ND5,ND6,Ndufa2,Ndufa4,Ndufa9,Ndufa10,Ndufs1,Ndufs2,Ndufs3,Ndufv1,Ndufs4,Ndufs8,Ndufv2,Otc,Pdha1,Phyh,Polg,Aldh18a1,Sco1,Sdha,Sdhb,Sdhd,Sod1,Surf1,Tst,Aifm1,Snap29,Fastkd2,Amacr,Poldip2,Trnt1,Taco1,Lipt1,Cycs,Ndufb11,Foxred1,Ndufa12,Ndufaf5,Pank2,Co…
167	Sensorineural Hearing Loss (disorder)	DisGeNET	0.033938	Acadvl,Ak2,Abcd1,Bcs1l,Cat,Cox6b1,Cox8a,Cox10,Cox15,Timm8a1,Dguok,Echs1,Gfer,Hsd17b10,Hsd17b4,Idh3a,Idh3b,ATP6,COX1,COX2,COX3,ND1,ND2,ND3,ND4,ND5,ND6,Ndufa1,Ndufa6,Ndufb3,Ndufb9,Ndufb10,Ndufs1,Ndufs2,Ndufs3,Ndufv1,Ndufs4,Ndufs8,Ndufv2,Ogdh,Opa1,Pdk3,Phyh,Polg,Aldh18a1,Sco1,Sdha,Sdhd,Sod2,Surf1,Tk2,Top3a,Pex11b,Sucla2,Aifm1,Snap29,Lonp1,Mfn2,Sco2,Dnm1l,Tsfm,Txnrd2,Yme1l1,Immt,Fastkd2,Lars2,Hars2,N…
167	Dysarthria	DisGeNET	0.0347691	Abcb7,Aldh3a2,Slc25a4,Auh,Bcs1l,Cox10,Cox15,Timm8a1,Echs1,Fxn,Hsd17b10,Hmgcl,ATP6,COX1,COX2,COX3,ND1,ND4,ND5,ND6,Ndufa2,Ndufa4,Ndufa9,Ndufa10,Ndufs1,Ndufs2,Ndufs3,Ndufv1,Ndufs4,Ndufs8,Ndufv2,Pdha1,Polg,Aldh18a1,Sdha,Spg7,Spr,Surf1,Tk2,Top3a,Tmem11,Sco2,Dnm1l,Fars2,Afg3l2,Polg2,Rpia,Pmpca,Amacr,Pnkd,Coq2,Pnpla8,Mecr,Taco1,Glrx5,Lipt1,Nsun2,Ttc19,Mtpap,Dars2,Vps13d,Foxred1,Ndufa12,Aars2,Coa7,Ndufaf…
167	Anemia	DisGeNET	0.0388454	Abcb7,Agxt,Ak2,Alas2,Slc25a5,Bcl2,Car5a,Casp3,Cat,Cox6b1,Cox8a,Cox10,Cox15,Dbi,Decr1,Echs1,Fabp1,Fech,Fhit,Gpx1,Gsr,Hmgcl,Idh2,Maob,CYTB,Mtx1,Ndufa2,Ndufa4,Ndufa9,Ndufa10,Ndufb8,Ndufs1,Ndufs2,Ndufs3,Ndufv1,Ndufs4,Ndufs8,Ndufv2,Pcca,Pccb,Pdha1,Polg,Ppox,Acsm3,Sco1,Sdha,Sdhb,Sdhc,Shmt2,Sod1,Sod2,Spg7,Surf1,Uqcrfs1,Recql4,Mfn2,Sco2,Bcl2l11,Aass,Slc25a13,Txnrd2,Fastkd2,Ndufaf3,Acad8,Bbc3,Coq2,Ak3,Yar…
167	Optic Atrophy	DisGeNET	0.0495746	Aco2,Agxt,Auh,Bcl2,Bcs1l,Comt,Cox6b1,Cox8a,Cox10,Cox15,Decr1,Timm8a1,Dguok,Sardh,Dmpk,Echs1,Fdxr,Fh1,Fxn,Hsd17b10,Idh3a,Idh3b,Letm1,Mipep,ATP6,COX1,COX2,COX3,CYTB,ND1,ND2,ND3,ND4,ND4L,ND5,ND6,Ndufa2,Ndufa4,Ndufa9,Ndufa10,Ndufb8,Ndufs1,Ndufs2,Ndufs3,Ndufv1,Ndufs4,Ndufs8,Ndufv2,Oat,Opa1,Pdha1,Polg,Sco1,Sdha,Sdhd,Spg7,Ssbp1,Surf1,Tk2,Txnrd1,Pdhx,Pex11b,Snap29,Recql4,Mfn2,Sco2,Dnm1l,Tsfm,Wars2,Micu1,…
169	Congenital clubfoot	DisGeNET	0.0152724	Bcl2,Comt,Fasn,Hadha,Hadhb,Hsd17b4,Letm1,Aldh18a1,Recql4,Fars2,Fkbp8,Ptrh2,Gdap1,Dars2,Slc25a19,Fkbp10,Atad1
169	Malignant neoplasm of colon and/or rectum	DisGeNET	0.0160775	Acaa1a,Acacb,Acat1,Acly,Aco2,Aldh2,Apex1,Bak1,Bax,Bcl2,Bcl2l1,Bid,Bnip3,Bok,Tspo,Casp3,Casp8,Casp9,Cat,Comt,Cox8a,Cpox,Cpt1a,Cpt2,Crat,Cry1,Cryz,Cyp24a1,Cyp27b1,Timm8a1,Dhodh,Dld,Sardh,Fabp1,Fasn,Fhit,Fpgs,Fth1,Gls,Glud1,Got2,Gpx1,Gsr,Hadhb,Hint1,Hmgcs2,Hsd17b4,Hspa9,Idh2,Ldhb,Lig3,Mcl1,COX1,COX2,Mutyh,Ndufa4,Nit1,Nme3,Nthl1,Ogg1,Pde2a,Pdk1,Pdk4,Slc25a3,Polb,Polg,Prodh,Sdhb,Shmt2,Sod1,Sod2,Spg7,S…
169	Adenocarcinoma of large intestine	DisGeNET	0.018203	Bax,Bcl2,Casp3,Dld,Fhit,Hspa9,Hspe1,Letm1,COX2,Mtx1,Mutyh,Nthl1,Uqcrc2,Pdhx,Abcb6,Pnkd,Mcat,Slc25a26,Gstk1
169	Deficiency of acetyl-CoA acetyltransferase	DisGeNET	0.0232287	Acaa1a,Acat1,Hadhb,Oxct1,Acaa2
169	Gonadal dysgenesis XX type deafness	DisGeNET	0.0232287	Hsd17b4,Clpp,Lars2,Hars2,Eral1
169	Primary physiologic amenorrhea	DisGeNET	0.0289107	Hsd17b4,Polg,Clpp,Slc25a13,Lars2,Mrps22
169	Teratoma	DisGeNET	0.0289107	Acat1,Bax,Bcl2,Fhit,Mcl1,Mettl8
169	Secondary malignant neoplasm of liver	DisGeNET	0.0296947	Bax,Bcl2,Bid,Tspo,C1qbp,Casp3,Dld,Fasn,Fhit,Fpgs,Hspa9,Hspd1,COX1,COX2,Ogg1,Pdk1,Pdk4,Spg7,Pdhx,Sco2,Tomm34,Sirt3,Poldip2,Slc25a37,Golph3,Gstk1,Dnlz
169	Congenital pectus excavatum	DisGeNET	0.0388454	Dhodh,Hsd17b4,Aldh18a1,Sdhb,Sdhc,Sdhd,Pdhx,Nsun2
169	Vegetation	DisGeNET	0.0388454	Acat1,Acly,Cat,Slc25a10,Sardh,COX1,Pcx,Clpp
169	Testicular Germ Cell Tumor	DisGeNET	0.0420228	Aldh7a1,Bak1,Bcl2,Casp3,Fhit,Hsd17b4,Slc25a44,Aifm3,Gstk1
169	Colorectal Carcinoma	DisGeNET	0.0467796	Acaa1a,Acaca,Acacb,Acadm,Acat1,Acly,Aco2,Aldh2,Aldh1b1,Abcd2,Amt,Apex1,Bad,Bak1,Bax,Bcl2,Bcl2l1,Bcl2l2,Bid,Bik,Bnip3,Bok,Tspo,Slc25a20,Casp3,Casp8,Casp9,Cat,Comt,Cox8a,Cpox,Cpt1a,Cpt2,Crat,Cry1,Cryz,Cyp24a1,Cyp27b1,Decr1,Timm8a1,Dguok,Dhodh,Dld,Sardh,Stom,Etfdh,Fabp1,Acsl1,Fasn,Fdxr,Fech,Fhit,Fpgs,Fth1,Gcdh,Gls,Glud1,Got2,Gpx1,Gsr,Hadhb,Hint1,Hmgcs2,Hsd17b4,Hspa9,Hspd1,Idh2,Ivd,Ldhb,Lig3,Mcl1,Mgs…
173	Portal Vein Thrombosis	DisGeNET	0.021652	Bcs1l,Cox8a,Pcx,Akap1,Acad8
173	Diffuse white matter abnormalities	DisGeNET	0.0352464	Ndufb8,Ndufs2,Pdha1,Surf1,Sco2,Ndufaf3,Slc25a22,Timm50
173	Early-Stage Breast Carcinoma	DisGeNET	0.0420228	Bcl2,Bcs1l,Comt,Etfa,Fasn,COX2,Pycr1,Phb2,Eral1,Htra2
173	Pulmonary Stenosis	DisGeNET	0.0420228	Cyp24a1,Sardh,Ndufb8,Ndufs2,Pdk1,Aldh18a1,Surf1,Sco2,Ndufaf3,Acad8
173	Failure to Thrive	DisGeNET	0.0420228	Acads,Aco2,Agxt,Ak2,Abcd1,Slc25a4,Auh,Bcs1l,Casp8,Comt,Cox6b1,Cox7b,Cox8a,Cox10,Cox15,Cps1,Cyp11a1,Cyp11b1,Cyp24a1,Cyp27b1,Dguok,Dld,Echs1,Fh1,Gatm,Gcdh,Got2,Hadha,Hadhb,Hadh,Hccs,Hsd17b4,Letm1,Mdh2,Mipep,Mpv17,ATP6,ND1,ND2,ND3,ND4,ND5,ND6,Ndufa1,Ndufa2,Ndufa4,Ndufa6,Ndufa9,Ndufa10,Ndufb3,Ndufb8,Ndufb9,Ndufb10,Ndufs1,Ndufs2,Ndufs3,Ndufv1,Ndufs4,Ndufs8,Ndufv2,Otc,Pcca,Pccb,Pdha1,Slc25a3,Polg,Pycr1…
176	Gastroesophageal reflux disease	DisGeNET	0.0420228	Abat,Slc25a4,Comt,Eci1,Letm1,ATP6,COX1,COX2,Polg,Pycr1,Aldh18a1,Lonp1,Polg2,Pars2,Fbxl4,Slc25a24,Trmt10c,Mrps34,Mcee,Atad1,Gstk1
177	Hamartoma Syndrome, Multiple	DisGeNET	0.0295082	Acat1,Bax,Bcl2,Casp3,Cat,Cyp11a1,Sardh,Gls,Gpx1,Hspa9,Maoa,Mutyh,Sdhb,Sdhc,Sdhd,Abcb6,Poldip2,Acad8,Mpc1,Gstk1
179	Bacteremia	DisGeNET	0.0160775	Casp3,Cat,Cs,Hspa9,COX2,Mrps30,Phb2,Glrx5,Mtpap,Chpt1,Mavs
179	Hypoplasia of corpus callosum	DisGeNET	0.0493058	Acaca,Aco2,Gfer,Hsd17b4,Mdh2,Aldh6a1,Ndufa2,Pdha1,Aifm1,Lonp1,Wars2,Polg2,Pars2,Fbxl4,Htra2,Pycr2,Slc25a24,Glrx5,Nsun2,Rmnd1,Dars2,Mrps22,Vars2,Pink1,Cars2,Nars2,Slc25a22,Pank2,Tars2,Coasy,Gpt2,Gfm1,Lyrm7,Sfxn1,Ears2,Nadk2,Iba57
180	Global developmental delay	DisGeNET	0.00304217	Abat,Abcb7,Acadm,Acads,Acadsb,Aco2,Abcd1,Nudt2,Aldh7a1,Auh,Bcs1l,Slc25a20,Cat,Comt,Cox6b1,Cox7b,Cox8a,Cox10,Cox15,Cps1,Cyp27a1,Dlat,Dld,Sardh,Dna2,Echs1,Fh1,Gatm,Gcdh,Gfer,Gykl1,Gls,Glud1,Got2,Gpd2,Hsd17b10,Hadha,Hadhb,Hccs,Hsd17b4,Hspd1,Idh2,Ivd,Letm1,Maoa,Maob,Mdh2,Mipep,Aldh6a1,Mpv17,ATP6,COX2,ND1,ND2,ND3,Ndufa1,Ndufa2,Ndufa4,Ndufa6,Ndufa9,Ndufa10,Ndufb3,Ndufb8,Ndufb9,Ndufb10,Ndufs1,Ndufs2,Ndu…
180	Clumsiness - motor delay	DisGeNET	0.0420228	Acadsb,Acat1,Auh,Cat,Cox6b1,Cox8a,Cox10,Crat,Cyp27b1,Sardh,Hadha,Hadhb,Hadh,Letm1,Opa1,Pdk3,Aldh18a1,Sco1,Sdha,Sdhb,Sdhd,Spr,Tk2,Aldh5a1,Lonp1,Prepl,Sco2,Coq7,Wars2,Micu1,Lias,Fastkd2,Hibch,Coq2,Taco1,Gdap1,Nsun2,Mtpap,Dars2,Iars2,Agk,Nif3l1,Cox14,Gfm1,Cox20,Sdhaf1,Pet100
180	Agenesis of corpus callosum	DisGeNET	0.0447187	Abat,Acaca,Acacb,Acadvl,Abcd1,Amt,Bcl2,Bnip3,Casp3,Cox7b,Cpt2,Cyp11a1,Cyp11b2,Decr1,Timm8a1,Sardh,Fh1,Gcsh,Gldc,Hccs,Hint1,Hsd17b4,Hspa9,Hspd1,Letm1,COX2,Pdha1,Prkaca,Pycr1,Aldh18a1,Sdhb,Star,Aifm1,Lonp1,Recql4,Mfn2,Glyat,Acot7,Hibch,Bbc3,Pycr2,Mrps16,Ndufb11,Tmlhe,Diablo,Slc25a19,Pink1,Nars2,Ears2
180	Leigh Disease	DisGeNET	0.046576	Bcs1l,Cox4i1,Cox8a,Cox10,Cox15,Cpox,Crat,Dld,Echs1,Fxn,ATP6,COX1,COX3,CYTB,ND1,ND2,ND3,ND4,ND5,ND6,Ndufa1,Ndufa2,Ndufa5,Ndufa9,Ndufa10,Ndufs1,Ndufs2,Ndufs3,Ndufv1,Ndufs4,Ndufs8,Ndufv2,Ogdh,Pdha1,Pdhb,Polg,Sdha,Sdhb,Sod2,Surf1,Txnrd1,Pdhx,Suclg1,Sucla2,Cox5a,Sco2,Tsfm,Lrpprc,Fars2,Lias,Ethe1,Mto1,Ndufaf3,Hibch,Uqcrq,Ndufaf4,Coq4,Taco1,Timmdc1,Lipt1,Pdp1,Ttc19,Ptcd3,Parl,Foxred1,Trmu,Iars2,Ndufa12,…
182	Mood swings	DisGeNET	0.021652	Bcs1l,Cox10,Cox15,Sardh,Echs1,Maoa,Ndufa2,Ndufa4,Ndufa9,Ndufa10,Ndufs1,Ndufs2,Ndufs3,Ndufv1,Ndufs4,Ndufs8,Ndufv2,Pdha1,Polg,Prkaca,Sdha,Sod1,Surf1,Taco1,Lipt1,Mtpap,Foxred1,Ndufa12,Ndufaf5,Pank2,Ndufaf2,Mtfmt,Ndufaf6,Nags,Ndufs7,Chchd10,Pet100
182	Severe intellectual disability	DisGeNET	0.0404261	Acat1,Aco2,Bcs1l,Cox15,Dbt,Dmpk,Echs1,Hmgcl,Letm1,Maoa,ATP6,Ndufa2,Ndufa4,Ndufa9,Ndufa10,Ndufs1,Ndufs2,Ndufs3,Ndufv1,Ndufs4,Ndufs8,Ndufv2,Pdha1,Phyh,Pycr1,Sdha,Surf1,Aldh5a1,Suclg1,Snap29,Wars2,Uqcrq,Pycr2,Taco1,Lipt1,Nsun2,Tmem70,Foxred1,Ndufa12,Ndufaf5,L2hgdh,Ndufaf2,Timm50,Mtfmt,Ndufaf6,Iba57,Ndufs7,Pet100
182	Fulminant Hepatic Failure with Cerebral Edema	DisGeNET	0.0446123	Tspo,Maoa,Maob
182	Hepatic Coma	DisGeNET	0.0446123	Tspo,Maoa,Maob
182	Hepatic Stupor	DisGeNET	0.0446123	Tspo,Maoa,Maob
182	Oppositional Defiant Disorder	DisGeNET	0.0446123	Comt,Maoa,Maob
182	Paranoid Schizophrenia	DisGeNET	0.0446123	Comt,Maoa,Maob
183	HYPERGLYCINURIA (disorder)	DisGeNET	0.0147353	Acadm,Amt,Gcsh,Gldc,Ivd,Pcca,Pccb,Prodh,Aldh4a1,Mccc2
183	Hypoglycemia	DisGeNET	0.0222099	Acadl,Acadm,Acadsb,Acadvl,Acat1,Auh,Bckdha,Bckdhb,Bcs1l,Bid,Car5a,Slc25a20,Cpt1a,Cpt2,Dbt,Timm8a1,Dguok,Dld,Etfa,Etfb,Etfdh,Gcdh,Gykl1,Glud1,Gsr,Hsd17b10,Hadha,Hadh,Hmgcl,Hmgcs2,Mpv17,ND1,ND2,ND3,Ndufa1,Ndufa6,Ndufb3,Ndufb9,Ndufb10,Ndufs1,Ndufs2,Ndufs3,Ndufv1,Ndufs4,Ndufs8,Ndufv2,Otc,Pcx,Pcca,Pccb,Pck2,Sod2,Star,Tfam,Ucp2,Uqcrb,Uqcrc2,Suclg1,Prepl,Dnm1l,Lrpprc,Wars2,Mlycd,Mto1,Ndufaf3,Uqcrq,Gls2,…
183	Arthritis, Psoriatic	DisGeNET	0.0388454	Acaca,Acadm,Cpt1a,Cpt2,Cyp11b1,Cyp24a1,Cyp27a1,Cyp27b1,Dlat,Etfa,Gls,Hspd1,COX1,COX2,Mtx1,Pcca,Pccb,Sod2,Ucp2,Ucp3,Lrpprc,Eral1,Acad8,Mrps18b,Hemk1,Chpt1
187	Hemorrhoids	DisGeNET	0.021652	Aldh2,Bcl2,Acad8
187	Antisocial Personality Disorder	DisGeNET	0.0289107	Aldh2,Cat,Maoa,Maob
187	Tuberculosis	DisGeNET	0.036994	Acaca,Aldh2,Bcl2,Bcs1l,Tspo,Casp3,Casp8,Casp9,Cat,Cpox,Cryz,Cyp27b1,Decr1,Dld,Sardh,Dut,Ehhadh,Fasn,Fdxr,Fhit,Fpgs,Fth1,Gykl1,Gls,Gsr,Gstz1,Hspd1,Hspe1,Mcl1,COX2,Ndufs3,Ndufs4,Pcx,Slc25a3,Sdhd,Prdx2,Tst,Txnrd1,Vdac1,Aldh5a1,H2-Ke6,Sucla2,Mfn2,Bcl2l10,Bcl2l11,Abcb6,Ppif,Fastk,Phb2,Acot7,Pmpca,Lars2,Mlycd,Amacr,Prdx5,Poldip2,Acad8,Trit1,Sars2,Oxsm,Dars2,Vps13d,Mccc1,Nln,Trmt5,Sugct,Chchd6,Cbr4,Atad…
187	Conduct Disorder	DisGeNET	0.0379851	Aldh2,Comt,Gldc,Maoa,Maob
187	Mixed anxiety and depressive disorder	DisGeNET	0.0379851	Aldh2,Comt,Maoa,Sod1,Acad8
187	Portal Vein Thrombosis	DisGeNET	0.0379851	Bcs1l,Cox8a,Pcx,Akap1,Acad8
187	Severe intellectual disability	DisGeNET	0.0420228	Acat1,Aco2,Bcs1l,Cox15,Dbt,Dmpk,Echs1,Hmgcl,Letm1,Maoa,ATP6,Ndufa2,Ndufa4,Ndufa9,Ndufa10,Ndufs1,Ndufs2,Ndufs3,Ndufv1,Ndufs4,Ndufs8,Ndufv2,Pdha1,Phyh,Pycr1,Sdha,Surf1,Aldh5a1,Suclg1,Snap29,Wars2,Uqcrq,Pycr2,Taco1,Lipt1,Nsun2,Tmem70,Foxred1,Ndufa12,Ndufaf5,L2hgdh,Ndufaf2,Timm50,Mtfmt,Ndufaf6,Iba57,Ndufs7,Pet100
187	Leukopenia	DisGeNET	0.0448471	Ak2,Aldh2,Apex1,Bcl2,Casp3,Casp8,Cat,Fasn,Fdxr,Fh1,Hmgcl,Ivd,Mcl1,Mtx1,Spg7,Prdx2,Sucla2,Yme1l1,Acad8,Cycs,Sars2,Chpt1,Timm50,Gstk1
1	proton motive force-driven ATP synthesis	GO:BP	1.54833e-06	Q9DCJ5,Q9D6J6,Q91VD9,Q9CQQ7,Q9CPQ8,Q9CQZ5,Q9CQC7,Q9CQ75,Q9CPP6,Q9DC70,Q91YT0,Q99LY9,Q9CQ54,Q8K3J1,Q91WD5,Q8K2B3,Q9DCT2,Q9DC69,P56382,P56135,Q7TMF3,Q8BK30
1	proton motive force-driven mitochondrial ATP synthesis	GO:BP	2.82119e-06	Q9DCJ5,Q9D6J6,Q91VD9,Q9CQQ7,Q9CQZ5,Q9CQC7,Q9CQ75,Q9CPP6,Q9DC70,Q91YT0,Q99LY9,Q9CQ54,Q8K3J1,Q91WD5,Q8K2B3,Q9DCT2,Q9DC69,P56382,P56135,Q7TMF3,Q8BK30
1	generation of precursor metabolites and energy	GO:BP	2.8217e-05	Q9DCJ5,Q9D6J6,Q91VD9,Q8R1I1,P99028,Q9CQQ7,Q8BH59,Q9CQZ5,Q9CQC7,Q9CQ75,Q9CPP6,Q921G7,Q9DC70,Q91YT0,Q9CQN1,Q99LY9,Q91WS0,Q9CQ54,Q8K3J1,Q91WD5,Q8K2B3,Q61387,Q9DCT2,Q9DC69,Q62425,P56382,Q9DB41,Q8K1R3,P97478,Q8K1Z0,P56135,Q7TMF3,Q9D6M3,P05132,Q8BK30,P00158,O35129
1	cellular respiration	GO:BP	3.43944e-05	Q9DCJ5,Q9D6J6,Q91VD9,Q8R1I1,P99028,Q9CQQ7,Q8BH59,Q9CQZ5,Q9CQC7,Q9CQ75,Q9CPP6,Q9DC70,Q91YT0,Q9CQN1,Q99LY9,Q91WS0,Q9CQ54,Q8K3J1,Q91WD5,Q8K2B3,Q61387,Q9DCT2,Q9DC69,P56382,Q9DB41,Q8K1R3,P97478,Q8K1Z0,P56135,Q7TMF3,Q9D6M3,P05132,Q8BK30,P00158
1	energy derivation by oxidation of organic compounds	GO:BP	4.08545e-05	Q9DCJ5,Q9D6J6,Q91VD9,Q8R1I1,P99028,Q9CQQ7,Q8BH59,Q9CQZ5,Q9CQC7,Q9CQ75,Q9CPP6,Q9DC70,Q91YT0,Q9CQN1,Q99LY9,Q91WS0,Q9CQ54,Q8K3J1,Q91WD5,Q8K2B3,Q61387,Q9DCT2,Q9DC69,P56382,Q9DB41,Q8K1R3,P97478,Q8K1Z0,P56135,Q7TMF3,Q9D6M3,P05132,Q8BK30,P00158
1	purine nucleotide biosynthetic process	GO:BP	4.46892e-05	Q9DCJ5,Q9D6J6,Q91VD9,Q9CQQ7,Q9CPQ8,P63030,Q9CQZ5,Q9CQC7,Q9CQ75,Q9CPP6,Q9DC70,Q91YT0,Q8BMF4,Q99LY9,Q91WC3,Q9CQ54,Q8K3J1,Q91WD5,Q8K2B3,Q9DCT2,P41216,Q9DC69,P56382,P56135,Q7TMF3,Q8BK30
1	purine ribonucleotide biosynthetic process	GO:BP	4.46892e-05	Q9DCJ5,Q9D6J6,Q91VD9,Q9CQQ7,Q9CPQ8,P63030,Q9CQZ5,Q9CQC7,Q9CQ75,Q9CPP6,Q9DC70,Q91YT0,Q8BMF4,Q99LY9,Q91WC3,Q9CQ54,Q8K3J1,Q91WD5,Q8K2B3,Q9DCT2,P41216,Q9DC69,P56382,P56135,Q7TMF3,Q8BK30
1	ribonucleoside triphosphate biosynthetic process	GO:BP	4.49645e-05	Q9DCJ5,Q9D6J6,Q91VD9,Q9CQQ7,Q9CPQ8,Q9CQZ5,Q9CQC7,Q9CQ75,Q9CPP6,Q9DC70,Q91YT0,Q99LY9,Q9CQ54,Q8K3J1,Q91WD5,Q8K2B3,Q9DCT2,Q9DC69,P56382,P56135,Q7TMF3,Q8BK30
1	ATP biosynthetic process	GO:BP	4.49645e-05	Q9DCJ5,Q9D6J6,Q91VD9,Q9CQQ7,Q9CPQ8,Q9CQZ5,Q9CQC7,Q9CQ75,Q9CPP6,Q9DC70,Q91YT0,Q99LY9,Q9CQ54,Q8K3J1,Q91WD5,Q8K2B3,Q9DCT2,Q9DC69,P56382,P56135,Q7TMF3,Q8BK30
1	purine ribonucleoside triphosphate biosynthetic process	GO:BP	4.49645e-05	Q9DCJ5,Q9D6J6,Q91VD9,Q9CQQ7,Q9CPQ8,Q9CQZ5,Q9CQC7,Q9CQ75,Q9CPP6,Q9DC70,Q91YT0,Q99LY9,Q9CQ54,Q8K3J1,Q91WD5,Q8K2B3,Q9DCT2,Q9DC69,P56382,P56135,Q7TMF3,Q8BK30
1	purine nucleoside triphosphate biosynthetic process	GO:BP	4.49645e-05	Q9DCJ5,Q9D6J6,Q91VD9,Q9CQQ7,Q9CPQ8,Q9CQZ5,Q9CQC7,Q9CQ75,Q9CPP6,Q9DC70,Q91YT0,Q99LY9,Q9CQ54,Q8K3J1,Q91WD5,Q8K2B3,Q9DCT2,Q9DC69,P56382,P56135,Q7TMF3,Q8BK30
1	purine-containing compound biosynthetic process	GO:BP	5.5882e-05	Q9DCJ5,Q9D6J6,Q91VD9,Q9CQQ7,Q9CPQ8,P63030,Q9CQZ5,Q9CQC7,Q9CQ75,Q9CPP6,Q9DC70,Q91YT0,Q8BMF4,Q99LY9,Q91WC3,Q9CQ54,Q8K3J1,Q91WD5,Q8K2B3,Q9DCT2,P41216,Q9DC69,P56382,P56135,Q7TMF3,Q8BK30
1	nucleoside triphosphate biosynthetic process	GO:BP	5.8929e-05	Q9DCJ5,Q9D6J6,Q91VD9,Q9CQQ7,Q9CPQ8,Q9CQZ5,Q9CQC7,Q9CQ75,Q9CPP6,Q9DC70,Q91YT0,Q99LY9,Q9CQ54,Q8K3J1,Q91WD5,Q8K2B3,Q9DCT2,Q9DC69,P56382,P56135,Q7TMF3,Q8BK30
1	ribonucleotide biosynthetic process	GO:BP	6.96532e-05	Q9DCJ5,Q9D6J6,Q91VD9,Q9CQQ7,Q9CPQ8,P63030,Q9CQZ5,Q9CQC7,Q9CQ75,Q9CPP6,Q9DC70,Q91YT0,Q8BMF4,Q99LY9,Q91WC3,Q9CQ54,Q8K3J1,Q91WD5,Q8K2B3,Q9DCT2,P41216,Q9DC69,P56382,P56135,Q7TMF3,Q8BK30
1	ribose phosphate biosynthetic process	GO:BP	6.96532e-05	Q9DCJ5,Q9D6J6,Q91VD9,Q9CQQ7,Q9CPQ8,P63030,Q9CQZ5,Q9CQC7,Q9CQ75,Q9CPP6,Q9DC70,Q91YT0,Q8BMF4,Q99LY9,Q91WC3,Q9CQ54,Q8K3J1,Q91WD5,Q8K2B3,Q9DCT2,P41216,Q9DC69,P56382,P56135,Q7TMF3,Q8BK30
1	oxidative phosphorylation	GO:BP	0.000100053	Q9DCJ5,Q9D6J6,Q91VD9,Q8R1I1,P99028,Q9CQQ7,Q9CQZ5,Q9CQC7,Q9CQ75,Q9CPP6,Q9DC70,Q91YT0,Q99LY9,Q9CQ54,Q8K3J1,Q91WD5,Q8K2B3,Q61387,Q9DCT2,Q9DC69,P56382,P97478,Q8K1Z0,P56135,Q7TMF3,Q8BK30,P00158
1	ribonucleoside triphosphate metabolic process	GO:BP	0.000277592	Q9DCJ5,Q9D6J6,Q91VD9,Q9CQQ7,Q9CPQ8,Q9CQZ5,Q9CQC7,Q9CQ75,Q9CPP6,Q9DC70,Q91YT0,Q99LY9,Q9CQ54,Q8K3J1,Q91WD5,Q8K2B3,P58281,Q9DCT2,Q9DC69,P56382,P56135,Q7TMF3,Q8BK30
1	purine ribonucleoside triphosphate metabolic process	GO:BP	0.000277592	Q9DCJ5,Q9D6J6,Q91VD9,Q9CQQ7,Q9CPQ8,Q9CQZ5,Q9CQC7,Q9CQ75,Q9CPP6,Q9DC70,Q91YT0,Q99LY9,Q9CQ54,Q8K3J1,Q91WD5,Q8K2B3,P58281,Q9DCT2,Q9DC69,P56382,P56135,Q7TMF3,Q8BK30
1	purine nucleoside triphosphate metabolic process	GO:BP	0.000277592	Q9DCJ5,Q9D6J6,Q91VD9,Q9CQQ7,Q9CPQ8,Q9CQZ5,Q9CQC7,Q9CQ75,Q9CPP6,Q9DC70,Q91YT0,Q99LY9,Q9CQ54,Q8K3J1,Q91WD5,Q8K2B3,P58281,Q9DCT2,Q9DC69,P56382,P56135,Q7TMF3,Q8BK30
1	carbohydrate derivative biosynthetic process	GO:BP	0.000299125	Q9DCJ5,Q9D6J6,Q91VD9,Q9CQQ7,Q9CPQ8,P63030,Q9CQZ5,Q9CQC7,Q9CQ75,Q9CPP6,Q9DC70,Q91YT0,Q8BMF4,Q99LY9,Q91WC3,Q9CQ54,Q8K3J1,Q91WD5,Q8K2B3,Q9DCT2,P41216,Q9DC69,P56382,P56135,Q7TMF3,Q8BK30
1	nucleotide biosynthetic process	GO:BP	0.000364195	Q9DCJ5,Q9D6J6,Q91VD9,Q9CQQ7,Q9CPQ8,P63030,Q9CQZ5,Q9CQC7,Q9CQ75,Q9CPP6,Q9DC70,Q91YT0,Q8BMF4,Q99LY9,Q91WC3,Q9CQ54,Q8K3J1,Q91WD5,Q8K2B3,Q9DCT2,P41216,Q9DC69,P56382,P56135,Q7TMF3,Q8BK30
1	nucleoside phosphate biosynthetic process	GO:BP	0.000364195	Q9DCJ5,Q9D6J6,Q91VD9,Q9CQQ7,Q9CPQ8,P63030,Q9CQZ5,Q9CQC7,Q9CQ75,Q9CPP6,Q9DC70,Q91YT0,Q8BMF4,Q99LY9,Q91WC3,Q9CQ54,Q8K3J1,Q91WD5,Q8K2B3,Q9DCT2,P41216,Q9DC69,P56382,P56135,Q7TMF3,Q8BK30
1	nucleoside triphosphate metabolic process	GO:BP	0.00043409	Q9DCJ5,Q9D6J6,Q91VD9,Q9CQQ7,Q9CPQ8,Q9CQZ5,Q9CQC7,Q9CQ75,Q9CPP6,Q9DC70,Q91YT0,Q99LY9,Q9CQ54,Q8K3J1,Q91WD5,Q8K2B3,P58281,Q9DCT2,Q9DC69,P56382,P56135,Q7TMF3,Q8BK30
1	ATP metabolic process	GO:BP	0.000846723	Q9DCJ5,Q9D6J6,Q91VD9,Q9CQQ7,Q9CPQ8,Q9CQZ5,Q9CQC7,Q9CQ75,Q9CPP6,Q9DC70,Q91YT0,Q99LY9,Q9CQ54,Q8K3J1,Q91WD5,Q8K2B3,Q9DCT2,Q9DC69,P56382,P56135,Q7TMF3,Q8BK30
1	electron transport chain	GO:BP	0.00160871	Q9D6J6,Q91VD9,Q8R1I1,P99028,Q8BH59,Q9CPP6,Q921G7,Q9DC70,Q91YT0,Q8K3J1,Q91WD5,Q8K2B3,Q9DCT2,Q9DB41,P97478,Q8K1Z0,Q7TMF3,Q9D6M3,Q8BK30,P00158
1	NADH dehydrogenase complex assembly	GO:BP	0.00196958	Q9DCJ5,Q91VD9,Q9CQZ5,Q9CQC7,Q9CQ75,Q9CPP6,Q9DC70,Q99LY9,Q9CQ54,Q8K3J1,Q91WD5,Q9DCT2,Q9DC69,Q8JZN5,Q9CZP5,A2APY7
1	mitochondrial respiratory chain complex I assembly	GO:BP	0.00196958	Q9DCJ5,Q91VD9,Q9CQZ5,Q9CQC7,Q9CQ75,Q9CPP6,Q9DC70,Q99LY9,Q9CQ54,Q8K3J1,Q91WD5,Q9DCT2,Q9DC69,Q8JZN5,Q9CZP5,A2APY7
1	respiratory electron transport chain	GO:BP	0.00307584	Q9D6J6,Q91VD9,Q8R1I1,P99028,Q8BH59,Q9CPP6,Q9DC70,Q91YT0,Q8K3J1,Q91WD5,Q8K2B3,Q9DCT2,Q9DB41,P97478,Q8K1Z0,Q7TMF3,Q9D6M3,Q8BK30,P00158
1	aerobic respiration	GO:BP	0.0080393	Q9DCJ5,Q9D6J6,Q91VD9,Q8R1I1,P99028,Q9CQQ7,Q9CQZ5,Q9CQC7,Q9CQ75,Q9CPP6,Q9DC70,Q91YT0,Q99LY9,Q9CQ54,Q8K3J1,Q91WD5,Q8K2B3,Q61387,Q9DCT2,Q9DC69,P56382,P97478,Q8K1Z0,P56135,Q7TMF3,Q8BK30,P00158
1	nucleobase-containing compound biosynthetic process	GO:BP	0.00982888	Q9DCJ5,Q9D6J6,Q91VD9,Q9CQQ7,Q9CPQ8,P63030,Q9CQZ5,Q9CQC7,Q9CQ75,Q9CPP6,Q9DC70,Q91YT0,Q8BMF4,Q99LY9,Q91WC3,Q9CQ54,Q8K3J1,Q91WD5,Q8K2B3,Q9DCT2,P67778,P41216,Q9DC69,P56382,P97478,P56135,Q7TMF3,P20108,Q8BK30,O35129
1	organophosphate biosynthetic process	GO:BP	0.0152526	Q9DCJ5,Q9D6J6,Q91VD9,Q9CQQ7,Q9CPQ8,P63030,Q9CQZ5,Q9CQC7,Q9CQ75,Q9CPP6,Q9DC70,Q91YT0,Q8BMF4,Q99LY9,Q91WC3,Q9CQ54,Q8K3J1,Q91WD5,Q8K2B3,Q9DCT2,P41216,Q9DC69,P56382,P56135,Q7TMF3,Q8BK30
1	purine ribonucleotide metabolic process	GO:BP	0.0177311	Q9DCJ5,Q9D6J6,Q91VD9,Q9CQQ7,Q9CPQ8,P63030,Q9CQZ5,Q9CQC7,Q9CQ75,Q9CPP6,Q9DC70,Q91YT0,Q8BMF4,Q99LY9,Q91WC3,Q9CQ54,Q8K3J1,Q91WD5,Q8K2B3,P58281,Q9DCT2,P41216,Q9DC69,P56382,P56135,Q7TMF3,P19096,Q8BK30
1	purine nucleotide metabolic process	GO:BP	0.020304	Q9DCJ5,Q9D6J6,Q91VD9,Q9CQQ7,Q9CPQ8,P63030,Q9CQZ5,Q9CQC7,Q9CQ75,Q9CPP6,Q9DC70,Q91YT0,Q8BMF4,Q99LY9,Q91WC3,Q9CQ54,Q8K3J1,Q91WD5,Q8K2B3,P58281,Q9DCT2,P41216,Q9DC69,P56382,P56135,Q7TMF3,P19096,Q8BK30
1	ribonucleotide metabolic process	GO:BP	0.0232157	Q9DCJ5,Q9D6J6,Q91VD9,Q9CQQ7,Q9CPQ8,P63030,Q9CQZ5,Q9CQC7,Q9CQ75,Q9CPP6,Q9DC70,Q91YT0,Q8BMF4,Q99LY9,Q91WC3,Q9CQ54,Q8K3J1,Q91WD5,Q8K2B3,P58281,Q9DCT2,P41216,Q9DC69,P56382,P56135,Q7TMF3,P19096,Q8BK30
1	ribose phosphate metabolic process	GO:BP	0.026506	Q9DCJ5,Q9D6J6,Q91VD9,Q9CQQ7,Q9CPQ8,P63030,Q9CQZ5,Q9CQC7,Q9CQ75,Q9CPP6,Q9DC70,Q91YT0,Q8BMF4,Q99LY9,Q91WC3,Q9CQ54,Q8K3J1,Q91WD5,Q8K2B3,P58281,Q9DCT2,P41216,Q9DC69,P56382,P56135,Q7TMF3,P19096,Q8BK30
1	purine-containing compound metabolic process	GO:BP	0.026506	Q9DCJ5,Q9D6J6,Q91VD9,Q9CQQ7,Q9CPQ8,P63030,Q9CQZ5,Q9CQC7,Q9CQ75,Q9CPP6,Q9DC70,Q91YT0,Q8BMF4,Q99LY9,Q91WC3,Q9CQ54,Q8K3J1,Q91WD5,Q8K2B3,P58281,Q9DCT2,P41216,Q9DC69,P56382,P56135,Q7TMF3,P19096,Q8BK30
1	phosphate-containing compound metabolic process	GO:BP	0.0357596	Q9DCJ5,Q9D6J6,Q91VD9,Q9CQQ7,Q9CPQ8,P63030,Q9CQZ5,Q9CQC7,Q91VM9,Q9CQ75,Q9CPP6,Q9DC70,Q91YT0,Q8BMF4,Q64521,P38647,Q99LY9,Q91WC3,Q9CQ54,Q8K3J1,Q91WD5,Q8K2B3,P58281,Q9DCT2,P67778,P41216,Q9DC69,P56382,Q9D880,P56135,Q7TMF3,P20108,P19096,P05132,Q8BK30,O35465,O35129
1	phosphorus metabolic process	GO:BP	0.0357596	Q9DCJ5,Q9D6J6,Q91VD9,Q9CQQ7,Q9CPQ8,P63030,Q9CQZ5,Q9CQC7,Q91VM9,Q9CQ75,Q9CPP6,Q9DC70,Q91YT0,Q8BMF4,Q64521,P38647,Q99LY9,Q91WC3,Q9CQ54,Q8K3J1,Q91WD5,Q8K2B3,P58281,Q9DCT2,P67778,P41216,Q9DC69,P56382,Q9D880,P56135,Q7TMF3,P20108,P19096,P05132,Q8BK30,O35465,O35129
3	proton motive force-driven ATP synthesis	GO:BP	0.00107352	Q9CQQ7,Q9CPQ8,Q9CQZ5,Q9CPP6,Q91YT0,Q99LY9,Q9CQ54,Q8K3J1,Q91WD5,Q9DCT2,Q9DC69,P56382,P03930,P56135,Q7TMF3,Q8BK30
3	purine nucleotide biosynthetic process	GO:BP	0.00217306	Q9CQQ7,Q9CPQ8,P63030,Q9CQZ5,Q9CPP6,Q91YT0,Q8BMF4,Q99LY9,Q91WC3,Q9CQ54,Q8K3J1,Q91WD5,Q9DCT2,Q9DC69,Q9D051,P56382,P03930,P56135,Q7TMF3,Q8BK30
3	purine ribonucleotide biosynthetic process	GO:BP	0.00217306	Q9CQQ7,Q9CPQ8,P63030,Q9CQZ5,Q9CPP6,Q91YT0,Q8BMF4,Q99LY9,Q91WC3,Q9CQ54,Q8K3J1,Q91WD5,Q9DCT2,Q9DC69,Q9D051,P56382,P03930,P56135,Q7TMF3,Q8BK30
3	purine-containing compound biosynthetic process	GO:BP	0.00256374	Q9CQQ7,Q9CPQ8,P63030,Q9CQZ5,Q9CPP6,Q91YT0,Q8BMF4,Q99LY9,Q91WC3,Q9CQ54,Q8K3J1,Q91WD5,Q9DCT2,Q9DC69,Q9D051,P56382,P03930,P56135,Q7TMF3,Q8BK30
3	proton motive force-driven mitochondrial ATP synthesis	GO:BP	0.00259314	Q9CQQ7,Q9CQZ5,Q9CPP6,Q91YT0,Q99LY9,Q9CQ54,Q8K3J1,Q91WD5,Q9DCT2,Q9DC69,P56382,P03930,P56135,Q7TMF3,Q8BK30
3	generation of precursor metabolites and energy	GO:BP	0.00268022	Q9CQQ7,Q8BH59,Q9CQZ5,Q9CPP6,Q921G7,Q91YT0,Q99LY9,Q91WS0,Q9CQ54,Q8K3J1,Q91WD5,Q61387,Q791V5,Q9DCT2,Q9DC69,Q62425,Q60597,P56382,Q9DB41,Q8K1R3,P97478,P03930,P56135,Q7TMF3,Q9D6M3,Q8BK30,P00158,O35129
3	ribose phosphate biosynthetic process	GO:BP	0.00301772	Q9CQQ7,Q9CPQ8,P63030,Q9CQZ5,Q9CPP6,Q91YT0,Q8BMF4,Q99LY9,Q91WC3,Q9CQ54,Q8K3J1,Q91WD5,Q9DCT2,Q9DC69,Q9D051,P56382,P03930,P56135,Q7TMF3,Q8BK30
3	ribonucleotide biosynthetic process	GO:BP	0.00301772	Q9CQQ7,Q9CPQ8,P63030,Q9CQZ5,Q9CPP6,Q91YT0,Q8BMF4,Q99LY9,Q91WC3,Q9CQ54,Q8K3J1,Q91WD5,Q9DCT2,Q9DC69,Q9D051,P56382,P03930,P56135,Q7TMF3,Q8BK30
3	purine nucleoside triphosphate metabolic process	GO:BP	0.00534741	Q9CQQ7,Q9CPQ8,Q9CQZ5,Q9CPP6,Q91YT0,Q99LY9,Q9CQ54,Q8K3J1,Q91WD5,P58281,Q791V5,Q9DCT2,Q9DC69,P56382,P03930,P56135,Q7TMF3,Q8BK30
3	ribonucleoside triphosphate metabolic process	GO:BP	0.00534741	Q9CQQ7,Q9CPQ8,Q9CQZ5,Q9CPP6,Q91YT0,Q99LY9,Q9CQ54,Q8K3J1,Q91WD5,P58281,Q791V5,Q9DCT2,Q9DC69,P56382,P03930,P56135,Q7TMF3,Q8BK30
3	purine ribonucleoside triphosphate metabolic process	GO:BP	0.00534741	Q9CQQ7,Q9CPQ8,Q9CQZ5,Q9CPP6,Q91YT0,Q99LY9,Q9CQ54,Q8K3J1,Q91WD5,P58281,Q791V5,Q9DCT2,Q9DC69,P56382,P03930,P56135,Q7TMF3,Q8BK30
3	nucleoside triphosphate metabolic process	GO:BP	0.00750961	Q9CQQ7,Q9CPQ8,Q9CQZ5,Q9CPP6,Q91YT0,Q99LY9,Q9CQ54,Q8K3J1,Q91WD5,P58281,Q791V5,Q9DCT2,Q9DC69,P56382,P03930,P56135,Q7TMF3,Q8BK30
3	cellular respiration	GO:BP	0.00802399	Q9CQQ7,Q8BH59,Q9CQZ5,Q9CPP6,Q91YT0,Q99LY9,Q91WS0,Q9CQ54,Q8K3J1,Q91WD5,Q61387,Q791V5,Q9DCT2,Q9DC69,Q60597,P56382,Q9DB41,Q8K1R3,P97478,P03930,P56135,Q7TMF3,Q9D6M3,Q8BK30,P00158
3	carbohydrate derivative biosynthetic process	GO:BP	0.00889142	Q9CQQ7,Q9CPQ8,P63030,Q9CQZ5,Q9CPP6,Q91YT0,Q8BMF4,Q99LY9,Q91WC3,Q9CQ54,Q8K3J1,Q91WD5,Q9DCT2,Q9DC69,Q9D051,P56382,P03930,P56135,Q7TMF3,Q8BK30
3	energy derivation by oxidation of organic compounds	GO:BP	0.00903769	Q9CQQ7,Q8BH59,Q9CQZ5,Q9CPP6,Q91YT0,Q99LY9,Q91WS0,Q9CQ54,Q8K3J1,Q91WD5,Q61387,Q791V5,Q9DCT2,Q9DC69,Q60597,P56382,Q9DB41,Q8K1R3,P97478,P03930,P56135,Q7TMF3,Q9D6M3,Q8BK30,P00158
3	nucleoside phosphate biosynthetic process	GO:BP	0.0102913	Q9CQQ7,Q9CPQ8,P63030,Q9CQZ5,Q9CPP6,Q91YT0,Q8BMF4,Q99LY9,Q91WC3,Q9CQ54,Q8K3J1,Q91WD5,Q9DCT2,Q9DC69,Q9D051,P56382,P03930,P56135,Q7TMF3,Q8BK30
3	nucleotide biosynthetic process	GO:BP	0.0102913	Q9CQQ7,Q9CPQ8,P63030,Q9CQZ5,Q9CPP6,Q91YT0,Q8BMF4,Q99LY9,Q91WC3,Q9CQ54,Q8K3J1,Q91WD5,Q9DCT2,Q9DC69,Q9D051,P56382,P03930,P56135,Q7TMF3,Q8BK30
3	ribonucleoside triphosphate biosynthetic process	GO:BP	0.0103575	Q9CQQ7,Q9CPQ8,Q9CQZ5,Q9CPP6,Q91YT0,Q99LY9,Q9CQ54,Q8K3J1,Q91WD5,Q9DCT2,Q9DC69,P56382,P03930,P56135,Q7TMF3,Q8BK30
3	ATP biosynthetic process	GO:BP	0.0103575	Q9CQQ7,Q9CPQ8,Q9CQZ5,Q9CPP6,Q91YT0,Q99LY9,Q9CQ54,Q8K3J1,Q91WD5,Q9DCT2,Q9DC69,P56382,P03930,P56135,Q7TMF3,Q8BK30
3	purine ribonucleoside triphosphate biosynthetic process	GO:BP	0.0103575	Q9CQQ7,Q9CPQ8,Q9CQZ5,Q9CPP6,Q91YT0,Q99LY9,Q9CQ54,Q8K3J1,Q91WD5,Q9DCT2,Q9DC69,P56382,P03930,P56135,Q7TMF3,Q8BK30
3	purine nucleoside triphosphate biosynthetic process	GO:BP	0.0103575	Q9CQQ7,Q9CPQ8,Q9CQZ5,Q9CPP6,Q91YT0,Q99LY9,Q9CQ54,Q8K3J1,Q91WD5,Q9DCT2,Q9DC69,P56382,P03930,P56135,Q7TMF3,Q8BK30
3	nucleoside triphosphate biosynthetic process	GO:BP	0.0124349	Q9CQQ7,Q9CPQ8,Q9CQZ5,Q9CPP6,Q91YT0,Q99LY9,Q9CQ54,Q8K3J1,Q91WD5,Q9DCT2,Q9DC69,P56382,P03930,P56135,Q7TMF3,Q8BK30
3	ATP metabolic process	GO:BP	0.0176409	Q9CQQ7,Q9CPQ8,Q9CQZ5,Q9CPP6,Q91YT0,Q99LY9,Q9CQ54,Q8K3J1,Q91WD5,Q791V5,Q9DCT2,Q9DC69,P56382,P03930,P56135,Q7TMF3,Q8BK30
3	purine ribonucleotide metabolic process	GO:BP	0.0321147	Q9CQQ7,Q9CPQ8,P63030,Q9CQZ5,Q9CPP6,Q91YT0,Q8BMF4,Q99LY9,Q91WC3,Q9CQ54,Q8K3J1,Q91WD5,P58281,Q791V5,Q9DCT2,Q9DC69,Q9D051,Q60597,P56382,P03930,P56135,Q7TMF3,Q8BK30
3	purine nucleotide metabolic process	GO:BP	0.0359929	Q9CQQ7,Q9CPQ8,P63030,Q9CQZ5,Q9CPP6,Q91YT0,Q8BMF4,Q99LY9,Q91WC3,Q9CQ54,Q8K3J1,Q91WD5,P58281,Q791V5,Q9DCT2,Q9DC69,Q9D051,Q60597,P56382,P03930,P56135,Q7TMF3,Q8BK30
3	ribonucleotide metabolic process	GO:BP	0.0402922	Q9CQQ7,Q9CPQ8,P63030,Q9CQZ5,Q9CPP6,Q91YT0,Q8BMF4,Q99LY9,Q91WC3,Q9CQ54,Q8K3J1,Q91WD5,P58281,Q791V5,Q9DCT2,Q9DC69,Q9D051,Q60597,P56382,P03930,P56135,Q7TMF3,Q8BK30
3	ribose phosphate metabolic process	GO:BP	0.0450529	Q9CQQ7,Q9CPQ8,P63030,Q9CQZ5,Q9CPP6,Q91YT0,Q8BMF4,Q99LY9,Q91WC3,Q9CQ54,Q8K3J1,Q91WD5,P58281,Q791V5,Q9DCT2,Q9DC69,Q9D051,Q60597,P56382,P03930,P56135,Q7TMF3,Q8BK30
3	purine-containing compound metabolic process	GO:BP	0.0450529	Q9CQQ7,Q9CPQ8,P63030,Q9CQZ5,Q9CPP6,Q91YT0,Q8BMF4,Q99LY9,Q91WC3,Q9CQ54,Q8K3J1,Q91WD5,P58281,Q791V5,Q9DCT2,Q9DC69,Q9D051,Q60597,P56382,P03930,P56135,Q7TMF3,Q8BK30
3	oxidative phosphorylation	GO:BP	0.0469945	Q9CQQ7,Q9CQZ5,Q9CPP6,Q91YT0,Q99LY9,Q9CQ54,Q8K3J1,Q91WD5,Q61387,Q791V5,Q9DCT2,Q9DC69,P56382,P97478,P03930,P56135,Q7TMF3,Q8BK30,P00158
4	oxidative phosphorylation	GO:BP	0.00641017	Q9Z1P6,Q9CQ69,Q9CR61,Q9CR21,Q9D0M3,Q3UIU2
4	aerobic respiration	GO:BP	0.0206695	Q9Z1P6,Q9CQ69,Q9CR61,Q9CR21,Q9D0M3,Q3UIU2
8	proton motive force-driven mitochondrial ATP synthesis	GO:BP	1.10132e-14	Q9Z1P6,Q91VD9,Q9CR61,Q9CR21,Q9DCS9,Q9CQZ6,Q9CQ91,Q9CPU2,P03911,Q9D6J5,Q8K3J1,Q3UIU2,Q9CQH3,Q9DCT2,Q7TMF3,O09111,P52503
8	proton motive force-driven ATP synthesis	GO:BP	3.72177e-14	Q9Z1P6,Q91VD9,Q9CR61,Q9CR21,Q9DCS9,Q9CQZ6,Q9CQ91,Q9CPU2,P03911,Q9D6J5,Q8K3J1,Q3UIU2,Q9CQH3,Q9DCT2,Q7TMF3,O09111,P52503
8	purine ribonucleoside triphosphate biosynthetic process	GO:BP	7.02473e-13	Q9Z1P6,Q91VD9,Q9CR61,Q9CR21,Q9DCS9,Q9CQZ6,Q9CQ91,Q9CPU2,P03911,Q9D6J5,Q8K3J1,Q3UIU2,Q9CQH3,Q9DCT2,Q7TMF3,O09111,P52503
8	ribonucleoside triphosphate biosynthetic process	GO:BP	7.02473e-13	Q9Z1P6,Q91VD9,Q9CR61,Q9CR21,Q9DCS9,Q9CQZ6,Q9CQ91,Q9CPU2,P03911,Q9D6J5,Q8K3J1,Q3UIU2,Q9CQH3,Q9DCT2,Q7TMF3,O09111,P52503
8	purine nucleoside triphosphate biosynthetic process	GO:BP	7.02473e-13	Q9Z1P6,Q91VD9,Q9CR61,Q9CR21,Q9DCS9,Q9CQZ6,Q9CQ91,Q9CPU2,P03911,Q9D6J5,Q8K3J1,Q3UIU2,Q9CQH3,Q9DCT2,Q7TMF3,O09111,P52503
8	ATP biosynthetic process	GO:BP	7.02473e-13	Q9Z1P6,Q91VD9,Q9CR61,Q9CR21,Q9DCS9,Q9CQZ6,Q9CQ91,Q9CPU2,P03911,Q9D6J5,Q8K3J1,Q3UIU2,Q9CQH3,Q9DCT2,Q7TMF3,O09111,P52503
8	nucleoside triphosphate biosynthetic process	GO:BP	8.94873e-13	Q9Z1P6,Q91VD9,Q9CR61,Q9CR21,Q9DCS9,Q9CQZ6,Q9CQ91,Q9CPU2,P03911,Q9D6J5,Q8K3J1,Q3UIU2,Q9CQH3,Q9DCT2,Q7TMF3,O09111,P52503
8	mitochondrial respiratory chain complex I assembly	GO:BP	1.18251e-12	Q91VD9,Q9CR61,Q9CR21,Q9DCS9,Q9CQZ6,Q9CQ91,Q9CPU2,P03911,Q9D6J5,Q8K3J1,Q3UIU2,Q9CQH3,Q9DCT2,O09111,P52503
8	NADH dehydrogenase complex assembly	GO:BP	1.18251e-12	Q91VD9,Q9CR61,Q9CR21,Q9DCS9,Q9CQZ6,Q9CQ91,Q9CPU2,P03911,Q9D6J5,Q8K3J1,Q3UIU2,Q9CQH3,Q9DCT2,O09111,P52503
8	oxidative phosphorylation	GO:BP	1.61372e-12	Q9Z1P6,Q91VD9,Q9CR61,Q9CR21,Q9D0M3,Q9DCS9,Q9CQZ6,Q9CQ91,Q9CPU2,P03911,Q9D6J5,Q8K3J1,Q3UIU2,Q9CQH3,Q9DCT2,Q7TMF3,O09111,P52503,P00158
8	ATP metabolic process	GO:BP	1.03081e-11	Q9Z1P6,Q91VD9,Q9CR61,Q9CR21,Q9DCS9,Q9CQZ6,Q9CQ91,Q9CPU2,P03911,Q9D6J5,Q8K3J1,Q3UIU2,Q9CQH3,Q9DCT2,Q7TMF3,O09111,P52503
8	ribonucleoside triphosphate metabolic process	GO:BP	1.54763e-11	Q9Z1P6,Q91VD9,Q9CR61,Q9CR21,Q9DCS9,Q9CQZ6,Q9CQ91,Q9CPU2,P03911,Q9D6J5,Q8K3J1,Q3UIU2,Q9CQH3,Q9DCT2,Q7TMF3,O09111,P52503
8	purine nucleoside triphosphate metabolic process	GO:BP	1.54763e-11	Q9Z1P6,Q91VD9,Q9CR61,Q9CR21,Q9DCS9,Q9CQZ6,Q9CQ91,Q9CPU2,P03911,Q9D6J5,Q8K3J1,Q3UIU2,Q9CQH3,Q9DCT2,Q7TMF3,O09111,P52503
8	purine ribonucleoside triphosphate metabolic process	GO:BP	1.54763e-11	Q9Z1P6,Q91VD9,Q9CR61,Q9CR21,Q9DCS9,Q9CQZ6,Q9CQ91,Q9CPU2,P03911,Q9D6J5,Q8K3J1,Q3UIU2,Q9CQH3,Q9DCT2,Q7TMF3,O09111,P52503
8	nucleoside triphosphate metabolic process	GO:BP	2.29986e-11	Q9Z1P6,Q91VD9,Q9CR61,Q9CR21,Q9DCS9,Q9CQZ6,Q9CQ91,Q9CPU2,P03911,Q9D6J5,Q8K3J1,Q3UIU2,Q9CQH3,Q9DCT2,Q7TMF3,O09111,P52503
8	aerobic respiration	GO:BP	8.14065e-11	Q9Z1P6,Q91VD9,Q9CR61,Q9CR21,Q9D0M3,Q9DCS9,Q9CQZ6,Q9CQ91,Q9CPU2,P03911,Q9D6J5,Q8K3J1,Q3UIU2,Q9CQH3,Q9DCT2,Q7TMF3,O09111,P52503,P00158
8	purine nucleotide biosynthetic process	GO:BP	1.726e-10	Q9Z1P6,Q91VD9,Q9CR61,Q9CR21,Q9DCS9,Q9CQZ6,Q9CQ91,Q9CPU2,P03911,Q9D6J5,Q8K3J1,Q3UIU2,Q9CQH3,Q9DCT2,Q7TMF3,O09111,P52503
8	purine ribonucleotide biosynthetic process	GO:BP	1.726e-10	Q9Z1P6,Q91VD9,Q9CR61,Q9CR21,Q9DCS9,Q9CQZ6,Q9CQ91,Q9CPU2,P03911,Q9D6J5,Q8K3J1,Q3UIU2,Q9CQH3,Q9DCT2,Q7TMF3,O09111,P52503
8	purine-containing compound biosynthetic process	GO:BP	2.0477e-10	Q9Z1P6,Q91VD9,Q9CR61,Q9CR21,Q9DCS9,Q9CQZ6,Q9CQ91,Q9CPU2,P03911,Q9D6J5,Q8K3J1,Q3UIU2,Q9CQH3,Q9DCT2,Q7TMF3,O09111,P52503
8	ribonucleotide biosynthetic process	GO:BP	2.42484e-10	Q9Z1P6,Q91VD9,Q9CR61,Q9CR21,Q9DCS9,Q9CQZ6,Q9CQ91,Q9CPU2,P03911,Q9D6J5,Q8K3J1,Q3UIU2,Q9CQH3,Q9DCT2,Q7TMF3,O09111,P52503
8	ribose phosphate biosynthetic process	GO:BP	2.42484e-10	Q9Z1P6,Q91VD9,Q9CR61,Q9CR21,Q9DCS9,Q9CQZ6,Q9CQ91,Q9CPU2,P03911,Q9D6J5,Q8K3J1,Q3UIU2,Q9CQH3,Q9DCT2,Q7TMF3,O09111,P52503
8	carbohydrate derivative biosynthetic process	GO:BP	7.53768e-10	Q9Z1P6,Q91VD9,Q9CR61,Q9CR21,Q9DCS9,Q9CQZ6,Q9CQ91,Q9CPU2,P03911,Q9D6J5,Q8K3J1,Q3UIU2,Q9CQH3,Q9DCT2,Q7TMF3,O09111,P52503
8	nucleotide biosynthetic process	GO:BP	8.805e-10	Q9Z1P6,Q91VD9,Q9CR61,Q9CR21,Q9DCS9,Q9CQZ6,Q9CQ91,Q9CPU2,P03911,Q9D6J5,Q8K3J1,Q3UIU2,Q9CQH3,Q9DCT2,Q7TMF3,O09111,P52503
8	nucleoside phosphate biosynthetic process	GO:BP	8.805e-10	Q9Z1P6,Q91VD9,Q9CR61,Q9CR21,Q9DCS9,Q9CQZ6,Q9CQ91,Q9CPU2,P03911,Q9D6J5,Q8K3J1,Q3UIU2,Q9CQH3,Q9DCT2,Q7TMF3,O09111,P52503
8	cellular respiration	GO:BP	1.77174e-09	Q9Z1P6,Q91VD9,Q9CR61,Q9CR21,Q9D0M3,Q9DCS9,Q9CQZ6,Q9CQ91,Q9CPU2,P03911,Q9D6J5,Q8K3J1,Q3UIU2,Q9CQH3,Q9DCT2,Q7TMF3,O09111,P52503,P00158
8	energy derivation by oxidation of organic compounds	GO:BP	1.9918e-09	Q9Z1P6,Q91VD9,Q9CR61,Q9CR21,Q9D0M3,Q9DCS9,Q9CQZ6,Q9CQ91,Q9CPU2,P03911,Q9D6J5,Q8K3J1,Q3UIU2,Q9CQH3,Q9DCT2,Q7TMF3,O09111,P52503,P00158
8	mitochondrial respiratory chain complex assembly	GO:BP	5.0502e-09	Q91VD9,Q9CR61,Q9CR21,Q9DCS9,Q9CQZ6,Q9CQ91,Q9CPU2,P03911,Q9D6J5,Q8K3J1,Q3UIU2,Q9CQH3,Q9DCT2,O09111,P52503
8	organophosphate biosynthetic process	GO:BP	1.8967e-08	Q9Z1P6,Q91VD9,Q9CR61,Q9CR21,Q9DCS9,Q9CQZ6,Q9CQ91,Q9CPU2,P03911,Q9D6J5,Q8K3J1,Q3UIU2,Q9CQH3,Q9DCT2,Q7TMF3,O09111,P52503
8	generation of precursor metabolites and energy	GO:BP	2.40415e-08	Q9Z1P6,Q91VD9,Q9CR61,Q9CR21,Q9D0M3,Q9DCS9,Q9CQZ6,Q9CQ91,Q9CPU2,P03911,Q9D6J5,Q8K3J1,Q3UIU2,Q9CQH3,Q9DCT2,Q7TMF3,O09111,P52503,P00158
8	purine ribonucleotide metabolic process	GO:BP	1.57181e-07	Q9Z1P6,Q91VD9,Q9CR61,Q9CR21,Q9DCS9,Q9CQZ6,Q9CQ91,Q9CPU2,P03911,Q9D6J5,Q8K3J1,Q3UIU2,Q9CQH3,Q9DCT2,Q7TMF3,O09111,P52503
8	purine nucleotide metabolic process	GO:BP	1.75289e-07	Q9Z1P6,Q91VD9,Q9CR61,Q9CR21,Q9DCS9,Q9CQZ6,Q9CQ91,Q9CPU2,P03911,Q9D6J5,Q8K3J1,Q3UIU2,Q9CQH3,Q9DCT2,Q7TMF3,O09111,P52503
8	ribonucleotide metabolic process	GO:BP	1.95325e-07	Q9Z1P6,Q91VD9,Q9CR61,Q9CR21,Q9DCS9,Q9CQZ6,Q9CQ91,Q9CPU2,P03911,Q9D6J5,Q8K3J1,Q3UIU2,Q9CQH3,Q9DCT2,Q7TMF3,O09111,P52503
8	ribose phosphate metabolic process	GO:BP	2.17477e-07	Q9Z1P6,Q91VD9,Q9CR61,Q9CR21,Q9DCS9,Q9CQZ6,Q9CQ91,Q9CPU2,P03911,Q9D6J5,Q8K3J1,Q3UIU2,Q9CQH3,Q9DCT2,Q7TMF3,O09111,P52503
8	purine-containing compound metabolic process	GO:BP	2.17477e-07	Q9Z1P6,Q91VD9,Q9CR61,Q9CR21,Q9DCS9,Q9CQZ6,Q9CQ91,Q9CPU2,P03911,Q9D6J5,Q8K3J1,Q3UIU2,Q9CQH3,Q9DCT2,Q7TMF3,O09111,P52503
8	nucleobase-containing compound biosynthetic process	GO:BP	6.10828e-07	Q9Z1P6,Q91VD9,Q9CR61,Q9CR21,Q9DCS9,Q9CQZ6,Q9CQ91,Q9CPU2,P03911,Q9D6J5,Q8K3J1,Q3UIU2,Q9CQH3,Q9DCT2,Q7TMF3,O09111,P52503
8	carbohydrate derivative metabolic process	GO:BP	1.32711e-06	Q9Z1P6,Q91VD9,Q9CR61,Q9CR21,Q9DCS9,Q9CQZ6,Q9CQ91,Q9CPU2,P03911,Q9D6J5,Q8K3J1,Q3UIU2,Q9CQH3,Q9DCT2,Q7TMF3,O09111,P52503
8	nucleotide metabolic process	GO:BP	2.53171e-06	Q9Z1P6,Q91VD9,Q9CR61,Q9CR21,Q9DCS9,Q9CQZ6,Q9CQ91,Q9CPU2,P03911,Q9D6J5,Q8K3J1,Q3UIU2,Q9CQH3,Q9DCT2,Q7TMF3,O09111,P52503
8	nucleoside phosphate metabolic process	GO:BP	2.53171e-06	Q9Z1P6,Q91VD9,Q9CR61,Q9CR21,Q9DCS9,Q9CQZ6,Q9CQ91,Q9CPU2,P03911,Q9D6J5,Q8K3J1,Q3UIU2,Q9CQH3,Q9DCT2,Q7TMF3,O09111,P52503
8	nucleobase-containing small molecule metabolic process	GO:BP	3.30987e-06	Q9Z1P6,Q91VD9,Q9CR61,Q9CR21,Q9DCS9,Q9CQZ6,Q9CQ91,Q9CPU2,P03911,Q9D6J5,Q8K3J1,Q3UIU2,Q9CQH3,Q9DCT2,Q7TMF3,O09111,P52503
8	aromatic compound biosynthetic process	GO:BP	3.94632e-06	Q9Z1P6,Q91VD9,Q9CR61,Q9CR21,Q9DCS9,Q9CQZ6,Q9CQ91,Q9CPU2,P03911,Q9D6J5,Q8K3J1,Q3UIU2,Q9CQH3,Q9DCT2,Q7TMF3,O09111,P52503
8	heterocycle biosynthetic process	GO:BP	5.57354e-06	Q9Z1P6,Q91VD9,Q9CR61,Q9CR21,Q9DCS9,Q9CQZ6,Q9CQ91,Q9CPU2,P03911,Q9D6J5,Q8K3J1,Q3UIU2,Q9CQH3,Q9DCT2,Q7TMF3,O09111,P52503
8	organic cyclic compound biosynthetic process	GO:BP	1.61853e-05	Q9Z1P6,Q91VD9,Q9CR61,Q9CR21,Q9DCS9,Q9CQZ6,Q9CQ91,Q9CPU2,P03911,Q9D6J5,Q8K3J1,Q3UIU2,Q9CQH3,Q9DCT2,Q7TMF3,O09111,P52503
8	organophosphate metabolic process	GO:BP	2.78131e-05	Q9Z1P6,Q91VD9,Q9CR61,Q9CR21,Q9DCS9,Q9CQZ6,Q9CQ91,Q9CPU2,P03911,Q9D6J5,Q8K3J1,Q3UIU2,Q9CQH3,Q9DCT2,Q7TMF3,O09111,P52503
8	protein-containing complex assembly	GO:BP	4.67136e-05	Q91VD9,Q9CR61,Q9CR21,Q9DCS9,Q9CQZ6,Q9CQ91,Q9CPU2,P03911,Q9D6J5,Q8K3J1,Q3UIU2,Q9CQH3,Q9DCT2,O09111,P52503
8	mitochondrial ATP synthesis coupled electron transport	GO:BP	5.13528e-05	Q9Z1P6,Q91VD9,Q9D0M3,P03911,Q8K3J1,Q3UIU2,Q9DCT2,Q7TMF3,P52503,P00158
8	ATP synthesis coupled electron transport	GO:BP	6.08225e-05	Q9Z1P6,Q91VD9,Q9D0M3,P03911,Q8K3J1,Q3UIU2,Q9DCT2,Q7TMF3,P52503,P00158
8	protein-containing complex organization	GO:BP	7.1816e-05	Q91VD9,Q9CR61,Q9CR21,Q9DCS9,Q9CQZ6,Q9CQ91,Q9CPU2,P03911,Q9D6J5,Q8K3J1,Q3UIU2,Q9CQH3,Q9DCT2,O09111,P52503
8	phosphate-containing compound metabolic process	GO:BP	0.000258213	Q9Z1P6,Q91VD9,Q9CR61,Q9CR21,Q9DCS9,Q9CQZ6,Q9CQ91,Q9CPU2,P03911,Q9D6J5,Q8K3J1,Q3UIU2,Q9CQH3,Q9DCT2,Q7TMF3,O09111,P52503
8	phosphorus metabolic process	GO:BP	0.000258213	Q9Z1P6,Q91VD9,Q9CR61,Q9CR21,Q9DCS9,Q9CQZ6,Q9CQ91,Q9CPU2,P03911,Q9D6J5,Q8K3J1,Q3UIU2,Q9CQH3,Q9DCT2,Q7TMF3,O09111,P52503
8	respiratory electron transport chain	GO:BP	0.000422475	Q9Z1P6,Q91VD9,Q9D0M3,P03911,Q8K3J1,Q3UIU2,Q9DCT2,Q7TMF3,P52503,P00158
8	cellular component assembly	GO:BP	0.000536881	Q91VD9,Q9CR61,Q9CR21,Q9DCS9,Q9CQZ6,Q9CQ91,Q9CPU2,P03911,Q9D6J5,Q8K3J1,Q3UIU2,Q9CQH3,Q9DCT2,O09111,P52503
8	electron transport chain	GO:BP	0.000707449	Q9Z1P6,Q91VD9,Q9D0M3,P03911,Q8K3J1,Q3UIU2,Q9DCT2,Q7TMF3,P52503,P00158
8	mitochondrial electron transport, NADH to ubiquinone	GO:BP	0.00136644	Q9Z1P6,Q91VD9,P03911,Q8K3J1,Q9DCT2,P52503
8	cellular component biogenesis	GO:BP	0.00138994	Q91VD9,Q9CR61,Q9CR21,Q9DCS9,Q9CQZ6,Q9CQ91,Q9CPU2,P03911,Q9D6J5,Q8K3J1,Q3UIU2,Q9CQH3,Q9DCT2,O09111,P52503
8	aerobic electron transport chain	GO:BP	0.00198315	Q9Z1P6,Q91VD9,Q9D0M3,P03911,Q8K3J1,Q9DCT2,P52503,P00158
8	nucleobase-containing compound metabolic process	GO:BP	0.00423688	Q9Z1P6,Q91VD9,Q9CR61,Q9CR21,Q9DCS9,Q9CQZ6,Q9CQ91,Q9CPU2,P03911,Q9D6J5,Q8K3J1,Q3UIU2,Q9CQH3,Q9DCT2,Q7TMF3,Q8C163,O09111,P52503
8	cellular nitrogen compound biosynthetic process	GO:BP	0.00537291	Q9Z1P6,Q91VD9,Q9CR61,Q9CR21,Q9DCS9,Q9CQZ6,Q9CQ91,Q9CPU2,P03911,Q9D6J5,Q9CQX2,Q8K3J1,Q3UIU2,Q9CQH3,Q9DCT2,Q7TMF3,O09111,P52503
8	mitochondrion organization	GO:BP	0.00743223	Q91VD9,Q9CR61,Q9CR21,Q9DCS9,Q9CQZ6,Q9CQ91,Q9CPU2,P03911,Q9D6J5,Q9D173,Q8K3J1,Q3UIU2,Q9CQH3,Q9DCT2,O09111,P52503
8	organonitrogen compound biosynthetic process	GO:BP	0.00931034	Q9Z1P6,Q91VD9,Q9CR61,Q9CR21,Q9DCS9,Q9CQZ6,Q9CQ91,Q9CPU2,P03911,Q9D6J5,Q8K3J1,Q3UIU2,Q9CQH3,Q9DCT2,Q7TMF3,O09111,P52503
8	heterocycle metabolic process	GO:BP	0.0172264	Q9Z1P6,Q91VD9,Q9CR61,Q9CR21,Q9DCS9,Q9CQZ6,Q9CQ91,Q9CPU2,P03911,Q9D6J5,Q8K3J1,Q3UIU2,Q9CQH3,Q9DCT2,Q7TMF3,Q8C163,O09111,P52503
8	cellular aromatic compound metabolic process	GO:BP	0.0241159	Q9Z1P6,Q91VD9,Q9CR61,Q9CR21,Q9DCS9,Q9CQZ6,Q9CQ91,Q9CPU2,P03911,Q9D6J5,Q8K3J1,Q3UIU2,Q9CQH3,Q9DCT2,Q7TMF3,Q8C163,O09111,P52503
9	proton motive force-driven ATP synthesis	GO:BP	0.00536963	Q91VR2,Q9CQQ7,Q9CPQ8,Q06185
9	ribonucleoside triphosphate biosynthetic process	GO:BP	0.0100896	Q91VR2,Q9CQQ7,Q9CPQ8,Q06185
9	purine ribonucleoside triphosphate biosynthetic process	GO:BP	0.0100896	Q91VR2,Q9CQQ7,Q9CPQ8,Q06185
9	ATP biosynthetic process	GO:BP	0.0100896	Q91VR2,Q9CQQ7,Q9CPQ8,Q06185
9	purine nucleoside triphosphate biosynthetic process	GO:BP	0.0100896	Q91VR2,Q9CQQ7,Q9CPQ8,Q06185
9	nucleoside triphosphate biosynthetic process	GO:BP	0.0106343	Q91VR2,Q9CQQ7,Q9CPQ8,Q06185
9	ATP metabolic process	GO:BP	0.0181687	Q91VR2,Q9CQQ7,Q9CPQ8,Q06185
9	purine nucleoside triphosphate metabolic process	GO:BP	0.0198775	Q91VR2,Q9CQQ7,Q9CPQ8,Q06185
9	purine ribonucleoside triphosphate metabolic process	GO:BP	0.0198775	Q91VR2,Q9CQQ7,Q9CPQ8,Q06185
9	ribonucleoside triphosphate metabolic process	GO:BP	0.0198775	Q91VR2,Q9CQQ7,Q9CPQ8,Q06185
9	nucleoside triphosphate metabolic process	GO:BP	0.0217026	Q91VR2,Q9CQQ7,Q9CPQ8,Q06185
9	purine ribonucleotide biosynthetic process	GO:BP	0.0340454	Q91VR2,Q9CQQ7,Q9CPQ8,Q06185
9	purine nucleotide biosynthetic process	GO:BP	0.0340454	Q91VR2,Q9CQQ7,Q9CPQ8,Q06185
9	purine-containing compound biosynthetic process	GO:BP	0.0353793	Q91VR2,Q9CQQ7,Q9CPQ8,Q06185
9	ribonucleotide biosynthetic process	GO:BP	0.0367514	Q91VR2,Q9CQQ7,Q9CPQ8,Q06185
9	ribose phosphate biosynthetic process	GO:BP	0.0367514	Q91VR2,Q9CQQ7,Q9CPQ8,Q06185
9	carbohydrate derivative biosynthetic process	GO:BP	0.0474862	Q91VR2,Q9CQQ7,Q9CPQ8,Q06185
9	nucleotide biosynthetic process	GO:BP	0.0491897	Q91VR2,Q9CQQ7,Q9CPQ8,Q06185
9	nucleoside phosphate biosynthetic process	GO:BP	0.0491897	Q91VR2,Q9CQQ7,Q9CPQ8,Q06185
21	mitochondrial electron transport, cytochrome c to oxygen	GO:BP	0.0142902	P19783,P12787
24	fatty acid derivative catabolic process	GO:BP	0.0451238	P11930,Q9D0K2
26	alditol phosphate metabolic process	GO:BP	0.0120108	Q8BP40,Q14DK4
27	mitochondrial electron transport, cytochrome c to oxygen	GO:BP	0.000217273	P19783,P17665,P43024
27	aerobic electron transport chain	GO:BP	0.0183574	P19783,P17665,P43024
27	mitochondrial ATP synthesis coupled electron transport	GO:BP	0.0300622	P19783,P17665,P43024
27	ATP synthesis coupled electron transport	GO:BP	0.0315994	P19783,P17665,P43024
28	mitochondrial electron transport, cytochrome c to oxygen	GO:BP	0.0232354	P17665,P43024,P12787
30	mitochondrial electron transport, cytochrome c to oxygen	GO:BP	0.00247341	P17665,P43024,P12787
30	ATP synthesis coupled electron transport	GO:BP	0.0140746	P17665,P43024,P00405,P12787
30	respiratory electron transport chain	GO:BP	0.0307966	P17665,P43024,P00405,P12787
30	electron transport chain	GO:BP	0.0380552	P17665,P43024,P00405,P12787
45	proton motive force-driven mitochondrial ATP synthesis	GO:BP	0.00148157	Q03265,Q9DB20,P03930,P97450
45	proton motive force-driven ATP synthesis	GO:BP	0.00192215	Q03265,Q9DB20,P03930,P97450
45	purine nucleoside triphosphate biosynthetic process	GO:BP	0.00364244	Q03265,Q9DB20,P03930,P97450
45	ribonucleoside triphosphate biosynthetic process	GO:BP	0.00364244	Q03265,Q9DB20,P03930,P97450
45	purine ribonucleoside triphosphate biosynthetic process	GO:BP	0.00364244	Q03265,Q9DB20,P03930,P97450
45	ATP biosynthetic process	GO:BP	0.00364244	Q03265,Q9DB20,P03930,P97450
45	nucleoside triphosphate biosynthetic process	GO:BP	0.00384202	Q03265,Q9DB20,P03930,P97450
45	ATP metabolic process	GO:BP	0.00662036	Q03265,Q9DB20,P03930,P97450
45	ribonucleoside triphosphate metabolic process	GO:BP	0.00725432	Q03265,Q9DB20,P03930,P97450
45	purine nucleoside triphosphate metabolic process	GO:BP	0.00725432	Q03265,Q9DB20,P03930,P97450
45	purine ribonucleoside triphosphate metabolic process	GO:BP	0.00725432	Q03265,Q9DB20,P03930,P97450
45	nucleoside triphosphate metabolic process	GO:BP	0.00793276	Q03265,Q9DB20,P03930,P97450
45	purine ribonucleotide biosynthetic process	GO:BP	0.0125522	Q03265,Q9DB20,P03930,P97450
45	purine nucleotide biosynthetic process	GO:BP	0.0125522	Q03265,Q9DB20,P03930,P97450
45	purine-containing compound biosynthetic process	GO:BP	0.0130543	Q03265,Q9DB20,P03930,P97450
45	ribose phosphate biosynthetic process	GO:BP	0.0135713	Q03265,Q9DB20,P03930,P97450
45	ribonucleotide biosynthetic process	GO:BP	0.0135713	Q03265,Q9DB20,P03930,P97450
45	carbohydrate derivative biosynthetic process	GO:BP	0.0176329	Q03265,Q9DB20,P03930,P97450
45	nucleoside phosphate biosynthetic process	GO:BP	0.0182799	Q03265,Q9DB20,P03930,P97450
45	nucleotide biosynthetic process	GO:BP	0.0182799	Q03265,Q9DB20,P03930,P97450
45	oxidative phosphorylation	GO:BP	0.0189447	Q03265,Q9DB20,P03930,P97450
45	organophosphate biosynthetic process	GO:BP	0.0375687	Q03265,Q9DB20,P03930,P97450
45	aerobic respiration	GO:BP	0.0422781	Q03265,Q9DB20,P03930,P97450
49	regulation of phospholipase C activity	GO:BP	0.0105437	P67778,O35129
49	positive regulation of ERK1 and ERK2 cascade	GO:BP	0.0105437	P67778,O35129
49	positive regulation of lipase activity	GO:BP	0.0105437	P67778,O35129
49	regulation of lipase activity	GO:BP	0.0105437	P67778,O35129
49	activation of protein kinase activity	GO:BP	0.0105437	P67778,O35129
49	CD40 signaling pathway	GO:BP	0.0105437	P67778,O35129
49	positive regulation of phospholipase C activity	GO:BP	0.0105437	P67778,O35129
49	positive regulation of phospholipase activity	GO:BP	0.0105437	P67778,O35129
49	regulation of phospholipase activity	GO:BP	0.0105437	P67778,O35129
49	activation of phospholipase C activity	GO:BP	0.0105437	P67778,O35129
49	positive regulation of immunoglobulin production	GO:BP	0.0105437	P67778,O35129
49	regulation of immunoglobulin production	GO:BP	0.0105437	P67778,O35129
49	positive regulation of NIK/NF-kappaB signaling	GO:BP	0.0105437	P67778,O35129
49	activation of protein kinase C activity	GO:BP	0.0105437	P67778,O35129
49	negative regulation of intracellular steroid hormone receptor signaling pathway	GO:BP	0.0315735	P67778,O35129
49	NIK/NF-kappaB signaling	GO:BP	0.0315735	P67778,O35129
49	regulation of NIK/NF-kappaB signaling	GO:BP	0.0315735	P67778,O35129
52	generation of precursor metabolites and energy	GO:BP	0.0293207	Q9D6R2,Q9CQA3,Q9CQQ7,Q9CPP6,Q91YT0,Q99LY9,Q91WS0,Q8K3J1,Q91WD5,Q9DCT2,Q9DC69,Q62425,P56382,Q9DB41,Q8K1R3,P97478,P03930,Q8R0Y6,Q8K1Z0,Q9D6M3,O35129
66	cell maturation	GO:BP	0.0129953	P58281,P28661,P05132
66	developmental maturation	GO:BP	0.0206926	P58281,P28661,P05132
66	anatomical structure maturation	GO:BP	0.0206926	P58281,P28661,P05132
73	mitochondrial respiratory chain complex I assembly	GO:BP	8.39567e-07	Q9CQZ5,Q9CQJ8,Q9CQC7,Q9CPP6,Q9DCS9,Q9DC70,Q9CQ91,Q9CPU2,Q99LY9,Q8K3J1,Q9CQH3,Q91WD5,Q9DCT2,Q9DC69,Q99LC3,Q8JZN5,Q9CZP5,A2APY7
73	NADH dehydrogenase complex assembly	GO:BP	8.39567e-07	Q9CQZ5,Q9CQJ8,Q9CQC7,Q9CPP6,Q9DCS9,Q9DC70,Q9CQ91,Q9CPU2,Q99LY9,Q8K3J1,Q9CQH3,Q91WD5,Q9DCT2,Q9DC69,Q99LC3,Q8JZN5,Q9CZP5,A2APY7
73	proton motive force-driven ATP synthesis	GO:BP	6.92779e-06	Q9CQQ7,Q9CPQ8,Q9CQZ5,Q9CQJ8,Q9CQC7,Q9CPP6,Q9DCS9,Q9DC70,Q9CQ91,Q9CPU2,Q99LY9,Q8K3J1,Q9CQH3,Q91WD5,Q9DCT2,Q9DC69,Q99LC3,Q7TMF3,Q8BK30
73	proton motive force-driven mitochondrial ATP synthesis	GO:BP	1.63341e-05	Q9CQQ7,Q9CQZ5,Q9CQJ8,Q9CQC7,Q9CPP6,Q9DCS9,Q9DC70,Q9CQ91,Q9CPU2,Q99LY9,Q8K3J1,Q9CQH3,Q91WD5,Q9DCT2,Q9DC69,Q99LC3,Q7TMF3,Q8BK30
73	purine nucleotide biosynthetic process	GO:BP	3.81657e-05	Q9CQQ7,Q9CPQ8,P63030,Q9CQZ5,Q9CQJ8,Q9CQC7,Q9CPP6,Q9DCS9,Q9DC70,Q9CQ91,Q9CPU2,Q99LY9,Q91WC3,Q8K3J1,Q9CQH3,Q91WD5,Q9DCT2,P41216,Q9DC69,Q99LC3,Q7TMF3,Q8BK30,P35487
73	purine ribonucleotide biosynthetic process	GO:BP	3.81657e-05	Q9CQQ7,Q9CPQ8,P63030,Q9CQZ5,Q9CQJ8,Q9CQC7,Q9CPP6,Q9DCS9,Q9DC70,Q9CQ91,Q9CPU2,Q99LY9,Q91WC3,Q8K3J1,Q9CQH3,Q91WD5,Q9DCT2,P41216,Q9DC69,Q99LC3,Q7TMF3,Q8BK30,P35487
73	purine-containing compound biosynthetic process	GO:BP	4.66715e-05	Q9CQQ7,Q9CPQ8,P63030,Q9CQZ5,Q9CQJ8,Q9CQC7,Q9CPP6,Q9DCS9,Q9DC70,Q9CQ91,Q9CPU2,Q99LY9,Q91WC3,Q8K3J1,Q9CQH3,Q91WD5,Q9DCT2,P41216,Q9DC69,Q99LC3,Q7TMF3,Q8BK30,P35487
73	ribose phosphate biosynthetic process	GO:BP	5.69167e-05	Q9CQQ7,Q9CPQ8,P63030,Q9CQZ5,Q9CQJ8,Q9CQC7,Q9CPP6,Q9DCS9,Q9DC70,Q9CQ91,Q9CPU2,Q99LY9,Q91WC3,Q8K3J1,Q9CQH3,Q91WD5,Q9DCT2,P41216,Q9DC69,Q99LC3,Q7TMF3,Q8BK30,P35487
73	ribonucleotide biosynthetic process	GO:BP	5.69167e-05	Q9CQQ7,Q9CPQ8,P63030,Q9CQZ5,Q9CQJ8,Q9CQC7,Q9CPP6,Q9DCS9,Q9DC70,Q9CQ91,Q9CPU2,Q99LY9,Q91WC3,Q8K3J1,Q9CQH3,Q91WD5,Q9DCT2,P41216,Q9DC69,Q99LC3,Q7TMF3,Q8BK30,P35487
73	purine nucleoside triphosphate metabolic process	GO:BP	8.09334e-05	Q9CQQ7,Q9CPQ8,Q9CQZ5,Q9CQJ8,Q9CQC7,Q9CPP6,Q9DCS9,Q9DC70,Q9CQ91,Q9CPU2,Q99LY9,Q8K3J1,Q9CQH3,Q91WD5,P58281,Q791V5,Q9DCT2,Q9DC69,Q99LC3,Q7TMF3,Q8BK30
73	purine ribonucleoside triphosphate metabolic process	GO:BP	8.09334e-05	Q9CQQ7,Q9CPQ8,Q9CQZ5,Q9CQJ8,Q9CQC7,Q9CPP6,Q9DCS9,Q9DC70,Q9CQ91,Q9CPU2,Q99LY9,Q8K3J1,Q9CQH3,Q91WD5,P58281,Q791V5,Q9DCT2,Q9DC69,Q99LC3,Q7TMF3,Q8BK30
73	ribonucleoside triphosphate metabolic process	GO:BP	8.09334e-05	Q9CQQ7,Q9CPQ8,Q9CQZ5,Q9CQJ8,Q9CQC7,Q9CPP6,Q9DCS9,Q9DC70,Q9CQ91,Q9CPU2,Q99LY9,Q8K3J1,Q9CQH3,Q91WD5,P58281,Q791V5,Q9DCT2,Q9DC69,Q99LC3,Q7TMF3,Q8BK30
73	ATP biosynthetic process	GO:BP	0.000123181	Q9CQQ7,Q9CPQ8,Q9CQZ5,Q9CQJ8,Q9CQC7,Q9CPP6,Q9DCS9,Q9DC70,Q9CQ91,Q9CPU2,Q99LY9,Q8K3J1,Q9CQH3,Q91WD5,Q9DCT2,Q9DC69,Q99LC3,Q7TMF3,Q8BK30
73	purine ribonucleoside triphosphate biosynthetic process	GO:BP	0.000123181	Q9CQQ7,Q9CPQ8,Q9CQZ5,Q9CQJ8,Q9CQC7,Q9CPP6,Q9DCS9,Q9DC70,Q9CQ91,Q9CPU2,Q99LY9,Q8K3J1,Q9CQH3,Q91WD5,Q9DCT2,Q9DC69,Q99LC3,Q7TMF3,Q8BK30
73	ribonucleoside triphosphate biosynthetic process	GO:BP	0.000123181	Q9CQQ7,Q9CPQ8,Q9CQZ5,Q9CQJ8,Q9CQC7,Q9CPP6,Q9DCS9,Q9DC70,Q9CQ91,Q9CPU2,Q99LY9,Q8K3J1,Q9CQH3,Q91WD5,Q9DCT2,Q9DC69,Q99LC3,Q7TMF3,Q8BK30
73	purine nucleoside triphosphate biosynthetic process	GO:BP	0.000123181	Q9CQQ7,Q9CPQ8,Q9CQZ5,Q9CQJ8,Q9CQC7,Q9CPP6,Q9DCS9,Q9DC70,Q9CQ91,Q9CPU2,Q99LY9,Q8K3J1,Q9CQH3,Q91WD5,Q9DCT2,Q9DC69,Q99LC3,Q7TMF3,Q8BK30
73	nucleoside triphosphate metabolic process	GO:BP	0.000123386	Q9CQQ7,Q9CPQ8,Q9CQZ5,Q9CQJ8,Q9CQC7,Q9CPP6,Q9DCS9,Q9DC70,Q9CQ91,Q9CPU2,Q99LY9,Q8K3J1,Q9CQH3,Q91WD5,P58281,Q791V5,Q9DCT2,Q9DC69,Q99LC3,Q7TMF3,Q8BK30
73	generation of precursor metabolites and energy	GO:BP	0.00013292	Q9CQQ7,Q9D0M3,Q9CQZ5,Q9CQJ8,Q9CQC7,Q9CPP6,Q921G7,Q9DCS9,Q9DC70,Q9CQ91,Q9CPU2,Q9CQN1,Q99LY9,Q91WS0,Q8K3J1,Q9CQH3,Q91WD5,Q791V5,Q9DCT2,Q9DC69,Q99LC3,Q62425,Q9DB41,Q8K1R3,P97478,Q8K1Z0,Q7TMF3,Q9D6M3,Q8BK30,P00158,O35129
73	nucleoside triphosphate biosynthetic process	GO:BP	0.00015542	Q9CQQ7,Q9CPQ8,Q9CQZ5,Q9CQJ8,Q9CQC7,Q9CPP6,Q9DCS9,Q9DC70,Q9CQ91,Q9CPU2,Q99LY9,Q8K3J1,Q9CQH3,Q91WD5,Q9DCT2,Q9DC69,Q99LC3,Q7TMF3,Q8BK30
73	carbohydrate derivative biosynthetic process	GO:BP	0.00021244	Q9CQQ7,Q9CPQ8,P63030,Q9CQZ5,Q9CQJ8,Q9CQC7,Q9CPP6,Q9DCS9,Q9DC70,Q9CQ91,Q9CPU2,Q99LY9,Q91WC3,Q8K3J1,Q9CQH3,Q91WD5,Q9DCT2,P41216,Q9DC69,Q99LC3,Q7TMF3,Q8BK30,P35487
73	nucleoside phosphate biosynthetic process	GO:BP	0.000253947	Q9CQQ7,Q9CPQ8,P63030,Q9CQZ5,Q9CQJ8,Q9CQC7,Q9CPP6,Q9DCS9,Q9DC70,Q9CQ91,Q9CPU2,Q99LY9,Q91WC3,Q8K3J1,Q9CQH3,Q91WD5,Q9DCT2,P41216,Q9DC69,Q99LC3,Q7TMF3,Q8BK30,P35487
73	nucleotide biosynthetic process	GO:BP	0.000253947	Q9CQQ7,Q9CPQ8,P63030,Q9CQZ5,Q9CQJ8,Q9CQC7,Q9CPP6,Q9DCS9,Q9DC70,Q9CQ91,Q9CPU2,Q99LY9,Q91WC3,Q8K3J1,Q9CQH3,Q91WD5,Q9DCT2,P41216,Q9DC69,Q99LC3,Q7TMF3,Q8BK30,P35487
73	ATP metabolic process	GO:BP	0.000297154	Q9CQQ7,Q9CPQ8,Q9CQZ5,Q9CQJ8,Q9CQC7,Q9CPP6,Q9DCS9,Q9DC70,Q9CQ91,Q9CPU2,Q99LY9,Q8K3J1,Q9CQH3,Q91WD5,Q791V5,Q9DCT2,Q9DC69,Q99LC3,Q7TMF3,Q8BK30
73	oxidative phosphorylation	GO:BP	0.000302872	Q9CQQ7,Q9D0M3,Q9CQZ5,Q9CQJ8,Q9CQC7,Q9CPP6,Q9DCS9,Q9DC70,Q9CQ91,Q9CPU2,Q99LY9,Q8K3J1,Q9CQH3,Q91WD5,Q791V5,Q9DCT2,Q9DC69,Q99LC3,P97478,Q8K1Z0,Q7TMF3,Q8BK30,P00158
73	cellular respiration	GO:BP	0.000354341	Q9CQQ7,Q9D0M3,Q9CQZ5,Q9CQJ8,Q9CQC7,Q9CPP6,Q9DCS9,Q9DC70,Q9CQ91,Q9CPU2,Q9CQN1,Q99LY9,Q91WS0,Q8K3J1,Q9CQH3,Q91WD5,Q791V5,Q9DCT2,Q9DC69,Q99LC3,Q9DB41,Q8K1R3,P97478,Q8K1Z0,Q7TMF3,Q9D6M3,Q8BK30,P00158
73	energy derivation by oxidation of organic compounds	GO:BP	0.000407752	Q9CQQ7,Q9D0M3,Q9CQZ5,Q9CQJ8,Q9CQC7,Q9CPP6,Q9DCS9,Q9DC70,Q9CQ91,Q9CPU2,Q9CQN1,Q99LY9,Q91WS0,Q8K3J1,Q9CQH3,Q91WD5,Q791V5,Q9DCT2,Q9DC69,Q99LC3,Q9DB41,Q8K1R3,P97478,Q8K1Z0,Q7TMF3,Q9D6M3,Q8BK30,P00158
73	mitochondrial respiratory chain complex assembly	GO:BP	0.00128307	Q9CQZ5,Q9CQJ8,Q9CQC7,Q9CPP6,Q8CC21,Q9DCS9,Q9DC70,Q9CQ91,Q9CPU2,Q99LY9,Q8K3J1,Q9CQH3,Q91WD5,Q9DCT2,Q9DC69,Q99LC3,Q8JZN5,Q9CZP5,A2APY7
73	purine ribonucleotide metabolic process	GO:BP	0.00575991	Q9CQQ7,Q9CPQ8,P63030,Q9CQZ5,Q9CQJ8,Q9CQC7,Q9CPP6,Q9DCS9,Q9DC70,Q9CQ91,Q9CPU2,Q99LY9,Q91WC3,Q8K3J1,Q9CQH3,Q91WD5,P58281,Q791V5,Q9DCT2,P41216,Q9DC69,Q99LC3,Q7TMF3,Q8BK30,P35487
73	purine nucleotide metabolic process	GO:BP	0.00654668	Q9CQQ7,Q9CPQ8,P63030,Q9CQZ5,Q9CQJ8,Q9CQC7,Q9CPP6,Q9DCS9,Q9DC70,Q9CQ91,Q9CPU2,Q99LY9,Q91WC3,Q8K3J1,Q9CQH3,Q91WD5,P58281,Q791V5,Q9DCT2,P41216,Q9DC69,Q99LC3,Q7TMF3,Q8BK30,P35487
73	ribonucleotide metabolic process	GO:BP	0.00743129	Q9CQQ7,Q9CPQ8,P63030,Q9CQZ5,Q9CQJ8,Q9CQC7,Q9CPP6,Q9DCS9,Q9DC70,Q9CQ91,Q9CPU2,Q99LY9,Q91WC3,Q8K3J1,Q9CQH3,Q91WD5,P58281,Q791V5,Q9DCT2,P41216,Q9DC69,Q99LC3,Q7TMF3,Q8BK30,P35487
73	organophosphate biosynthetic process	GO:BP	0.00774034	Q9CQQ7,Q9CPQ8,P63030,Q9CQZ5,Q9CQJ8,Q9CQC7,Q9CPP6,Q9DCS9,Q9DC70,Q9CQ91,Q9CPU2,Q99LY9,Q91WC3,Q8K3J1,Q9CQH3,Q91WD5,Q9DCT2,P41216,Q9DC69,Q99LC3,Q7TMF3,Q8BK30,P35487
73	nucleobase-containing compound biosynthetic process	GO:BP	0.0079306	Q9CQQ7,Q9CPQ8,P63030,Q9CQZ5,Q9CQJ8,Q9CQC7,Q9CPP6,Q9DCS9,Q9DC70,Q9CQ91,Q9CPU2,Q99LY9,Q91WC3,Q8K3J1,Q9CQH3,Q91WD5,Q9DCT2,P67778,P41216,Q9DC69,Q99LC3,P97478,Q7TMF3,Q8BK30,P35487,O35129
73	purine-containing compound metabolic process	GO:BP	0.0084247	Q9CQQ7,Q9CPQ8,P63030,Q9CQZ5,Q9CQJ8,Q9CQC7,Q9CPP6,Q9DCS9,Q9DC70,Q9CQ91,Q9CPU2,Q99LY9,Q91WC3,Q8K3J1,Q9CQH3,Q91WD5,P58281,Q791V5,Q9DCT2,P41216,Q9DC69,Q99LC3,Q7TMF3,Q8BK30,P35487
73	ribose phosphate metabolic process	GO:BP	0.0084247	Q9CQQ7,Q9CPQ8,P63030,Q9CQZ5,Q9CQJ8,Q9CQC7,Q9CPP6,Q9DCS9,Q9DC70,Q9CQ91,Q9CPU2,Q99LY9,Q91WC3,Q8K3J1,Q9CQH3,Q91WD5,P58281,Q791V5,Q9DCT2,P41216,Q9DC69,Q99LC3,Q7TMF3,Q8BK30,P35487
73	aerobic respiration	GO:BP	0.0131738	Q9CQQ7,Q9D0M3,Q9CQZ5,Q9CQJ8,Q9CQC7,Q9CPP6,Q9DCS9,Q9DC70,Q9CQ91,Q9CPU2,Q99LY9,Q8K3J1,Q9CQH3,Q91WD5,Q791V5,Q9DCT2,Q9DC69,Q99LC3,P97478,Q8K1Z0,Q7TMF3,Q8BK30,P00158
73	carbohydrate derivative metabolic process	GO:BP	0.0201505	Q9CQQ7,Q9CPQ8,P63030,Q9CQZ5,Q9CQJ8,Q9CQC7,Q9CPP6,Q9DCS9,Q9DC70,Q9CQ91,Q9CPU2,Q64521,Q99LY9,Q91WC3,Q8K3J1,Q9CQH3,Q91WD5,P58281,Q791V5,Q9DCT2,P41216,Q9DC69,Q99LC3,Q7TMF3,Q8BK30,P35487
73	electron transport chain	GO:BP	0.022786	Q9D0M3,Q9CPP6,Q921G7,Q9DC70,Q8K3J1,Q91WD5,Q791V5,Q9DCT2,Q99LC3,Q9DB41,P97478,Q8K1Z0,Q7TMF3,Q9D6M3,Q8BK30,P00158
82	proton motive force-driven ATP synthesis	GO:BP	3.49909e-07	Q9CPQ8,Q9CQJ8,Q9CQ75,Q9CPP6,Q9CQ91,Q9CPU2,Q99LY9,Q9D6J5,Q9CQ54,Q8K3J1,Q3UIU2,Q9CQH3,Q91WD5,Q9DCT2,Q99LC3,P56135,Q8BK30,P52503
82	purine ribonucleotide biosynthetic process	GO:BP	5.40631e-07	Q9CPQ8,Q9CQJ8,Q9CQ75,Q9CPP6,Q9CQ91,Q9CPU2,Q99LY9,Q91WC3,Q9D6J5,Q9CQ54,Q8K3J1,Q3UIU2,Q9CQH3,Q91WD5,Q9DCT2,P41216,Q64373,Q99LC3,P56135,Q8BK30,P52503,P35487
82	purine nucleotide biosynthetic process	GO:BP	5.40631e-07	Q9CPQ8,Q9CQJ8,Q9CQ75,Q9CPP6,Q9CQ91,Q9CPU2,Q99LY9,Q91WC3,Q9D6J5,Q9CQ54,Q8K3J1,Q3UIU2,Q9CQH3,Q91WD5,Q9DCT2,P41216,Q64373,Q99LC3,P56135,Q8BK30,P52503,P35487
82	purine-containing compound biosynthetic process	GO:BP	6.63482e-07	Q9CPQ8,Q9CQJ8,Q9CQ75,Q9CPP6,Q9CQ91,Q9CPU2,Q99LY9,Q91WC3,Q9D6J5,Q9CQ54,Q8K3J1,Q3UIU2,Q9CQH3,Q91WD5,Q9DCT2,P41216,Q64373,Q99LC3,P56135,Q8BK30,P52503,P35487
82	purine ribonucleoside triphosphate biosynthetic process	GO:BP	6.9437e-07	Q9CPQ8,Q9CQJ8,Q9CQ75,Q9CPP6,Q9CQ91,Q9CPU2,Q99LY9,Q9D6J5,Q9CQ54,Q8K3J1,Q3UIU2,Q9CQH3,Q91WD5,Q9DCT2,Q64373,Q99LC3,P56135,Q8BK30,P52503
82	ribonucleoside triphosphate biosynthetic process	GO:BP	6.9437e-07	Q9CPQ8,Q9CQJ8,Q9CQ75,Q9CPP6,Q9CQ91,Q9CPU2,Q99LY9,Q9D6J5,Q9CQ54,Q8K3J1,Q3UIU2,Q9CQH3,Q91WD5,Q9DCT2,Q64373,Q99LC3,P56135,Q8BK30,P52503
82	purine nucleoside triphosphate biosynthetic process	GO:BP	6.9437e-07	Q9CPQ8,Q9CQJ8,Q9CQ75,Q9CPP6,Q9CQ91,Q9CPU2,Q99LY9,Q9D6J5,Q9CQ54,Q8K3J1,Q3UIU2,Q9CQH3,Q91WD5,Q9DCT2,Q64373,Q99LC3,P56135,Q8BK30,P52503
82	ATP biosynthetic process	GO:BP	6.9437e-07	Q9CPQ8,Q9CQJ8,Q9CQ75,Q9CPP6,Q9CQ91,Q9CPU2,Q99LY9,Q9D6J5,Q9CQ54,Q8K3J1,Q3UIU2,Q9CQH3,Q91WD5,Q9DCT2,Q64373,Q99LC3,P56135,Q8BK30,P52503
82	ribonucleotide biosynthetic process	GO:BP	8.1215e-07	Q9CPQ8,Q9CQJ8,Q9CQ75,Q9CPP6,Q9CQ91,Q9CPU2,Q99LY9,Q91WC3,Q9D6J5,Q9CQ54,Q8K3J1,Q3UIU2,Q9CQH3,Q91WD5,Q9DCT2,P41216,Q64373,Q99LC3,P56135,Q8BK30,P52503,P35487
82	ribose phosphate biosynthetic process	GO:BP	8.1215e-07	Q9CPQ8,Q9CQJ8,Q9CQ75,Q9CPP6,Q9CQ91,Q9CPU2,Q99LY9,Q91WC3,Q9D6J5,Q9CQ54,Q8K3J1,Q3UIU2,Q9CQH3,Q91WD5,Q9DCT2,P41216,Q64373,Q99LC3,P56135,Q8BK30,P52503,P35487
82	nucleoside triphosphate biosynthetic process	GO:BP	8.90401e-07	Q9CPQ8,Q9CQJ8,Q9CQ75,Q9CPP6,Q9CQ91,Q9CPU2,Q99LY9,Q9D6J5,Q9CQ54,Q8K3J1,Q3UIU2,Q9CQH3,Q91WD5,Q9DCT2,Q64373,Q99LC3,P56135,Q8BK30,P52503
82	proton motive force-driven mitochondrial ATP synthesis	GO:BP	1.12305e-06	Q9CQJ8,Q9CQ75,Q9CPP6,Q9CQ91,Q9CPU2,Q99LY9,Q9D6J5,Q9CQ54,Q8K3J1,Q3UIU2,Q9CQH3,Q91WD5,Q9DCT2,Q99LC3,P56135,Q8BK30,P52503
82	carbohydrate derivative biosynthetic process	GO:BP	3.12463e-06	Q9CPQ8,Q9CQJ8,Q9CQ75,Q9CPP6,Q9CQ91,Q9CPU2,Q99LY9,Q91WC3,Q9D6J5,Q9CQ54,Q8K3J1,Q3UIU2,Q9CQH3,Q91WD5,Q9DCT2,P41216,Q64373,Q99LC3,P56135,Q8BK30,P52503,P35487
82	nucleoside phosphate biosynthetic process	GO:BP	3.75345e-06	Q9CPQ8,Q9CQJ8,Q9CQ75,Q9CPP6,Q9CQ91,Q9CPU2,Q99LY9,Q91WC3,Q9D6J5,Q9CQ54,Q8K3J1,Q3UIU2,Q9CQH3,Q91WD5,Q9DCT2,P41216,Q64373,Q99LC3,P56135,Q8BK30,P52503,P35487
82	nucleotide biosynthetic process	GO:BP	3.75345e-06	Q9CPQ8,Q9CQJ8,Q9CQ75,Q9CPP6,Q9CQ91,Q9CPU2,Q99LY9,Q91WC3,Q9D6J5,Q9CQ54,Q8K3J1,Q3UIU2,Q9CQH3,Q91WD5,Q9DCT2,P41216,Q64373,Q99LC3,P56135,Q8BK30,P52503,P35487
82	NADH dehydrogenase complex assembly	GO:BP	8.15205e-06	Q9CQJ8,Q9CQ75,Q9CPP6,Q9CQ91,Q9CPU2,Q99LY9,Q9D6J5,Q9CQ54,Q8K3J1,Q3UIU2,Q9CQH3,Q91WD5,Q9DCT2,Q99LC3,P52503
82	mitochondrial respiratory chain complex I assembly	GO:BP	8.15205e-06	Q9CQJ8,Q9CQ75,Q9CPP6,Q9CQ91,Q9CPU2,Q99LY9,Q9D6J5,Q9CQ54,Q8K3J1,Q3UIU2,Q9CQH3,Q91WD5,Q9DCT2,Q99LC3,P52503
82	ATP metabolic process	GO:BP	1.0648e-05	Q9CPQ8,Q9CQJ8,Q9CQ75,Q9CPP6,Q9CQ91,Q9CPU2,Q99LY9,Q9D6J5,Q9CQ54,Q8K3J1,Q3UIU2,Q9CQH3,Q91WD5,Q9DCT2,Q64373,Q99LC3,P56135,Q8BK30,P52503
82	nucleobase-containing compound biosynthetic process	GO:BP	1.09728e-05	Q8R3J4,Q9CPQ8,Q9CQJ8,Q9CQ75,Q9CPP6,Q9CQ91,Q9CPU2,Q99LY9,Q91WC3,Q9D6J5,Q9CQ54,Q8K3J1,Q3UIU2,Q9CQH3,Q91WD5,Q9DCT2,P67778,P41216,Q64373,Q99LC3,P97478,P56135,Q8BK30,P52503,P35487,O35129
82	ribonucleoside triphosphate metabolic process	GO:BP	1.59992e-05	Q9CPQ8,Q9CQJ8,Q9CQ75,Q9CPP6,Q9CQ91,Q9CPU2,Q99LY9,Q9D6J5,Q9CQ54,Q8K3J1,Q3UIU2,Q9CQH3,Q91WD5,Q9DCT2,Q64373,Q99LC3,P56135,Q8BK30,P52503
82	purine ribonucleoside triphosphate metabolic process	GO:BP	1.59992e-05	Q9CPQ8,Q9CQJ8,Q9CQ75,Q9CPP6,Q9CQ91,Q9CPU2,Q99LY9,Q9D6J5,Q9CQ54,Q8K3J1,Q3UIU2,Q9CQH3,Q91WD5,Q9DCT2,Q64373,Q99LC3,P56135,Q8BK30,P52503
82	purine nucleoside triphosphate metabolic process	GO:BP	1.59992e-05	Q9CPQ8,Q9CQJ8,Q9CQ75,Q9CPP6,Q9CQ91,Q9CPU2,Q99LY9,Q9D6J5,Q9CQ54,Q8K3J1,Q3UIU2,Q9CQH3,Q91WD5,Q9DCT2,Q64373,Q99LC3,P56135,Q8BK30,P52503
82	nucleoside triphosphate metabolic process	GO:BP	2.37561e-05	Q9CPQ8,Q9CQJ8,Q9CQ75,Q9CPP6,Q9CQ91,Q9CPU2,Q99LY9,Q9D6J5,Q9CQ54,Q8K3J1,Q3UIU2,Q9CQH3,Q91WD5,Q9DCT2,Q64373,Q99LC3,P56135,Q8BK30,P52503
82	oxidative phosphorylation	GO:BP	2.93098e-05	P99028,Q9CQJ8,Q9CQ75,Q9CPP6,Q9CQ91,Q9CPU2,Q99LY9,Q9D6J5,Q9CQ54,Q8K3J1,Q3UIU2,Q9CQH3,Q91WD5,P48771,Q9DCT2,Q99LC3,P97478,P56135,Q8BK30,P52503,P00158
82	generation of precursor metabolites and energy	GO:BP	3.19542e-05	P99028,Q8BH59,Q9CQJ8,Q9CQ75,Q9CPP6,Q921G7,Q9CQ91,Q9CPU2,Q99LY9,Q9D6J5,Q9CQ54,Q8K3J1,Q3UIU2,Q9CQH3,Q91WD5,P48771,Q9DCT2,Q99LC3,Q62425,Q9DB41,P97478,P56135,Q9D6M3,Q8BK30,P52503,P00158,O35129
82	organophosphate biosynthetic process	GO:BP	0.000131226	Q9CPQ8,Q9CQJ8,Q9CQ75,Q9CPP6,Q9CQ91,Q9CPU2,Q99LY9,Q91WC3,Q9D6J5,Q9CQ54,Q8K3J1,Q3UIU2,Q9CQH3,Q91WD5,Q9DCT2,P41216,Q64373,Q99LC3,P56135,Q8BK30,P52503,P35487
82	aromatic compound biosynthetic process	GO:BP	0.000142557	Q8R3J4,Q9CPQ8,Q9CQJ8,Q9CQ75,Q9CPP6,Q9CQ91,Q9CPU2,Q99LY9,Q91WC3,Q9D6J5,Q9CQ54,Q8K3J1,Q3UIU2,Q9CQH3,Q91WD5,Q9DCT2,P67778,P41216,Q64373,Q99LC3,P97478,P56135,Q8BK30,P52503,P35487,O35129
82	cellular respiration	GO:BP	0.000208123	P99028,Q8BH59,Q9CQJ8,Q9CQ75,Q9CPP6,Q9CQ91,Q9CPU2,Q99LY9,Q9D6J5,Q9CQ54,Q8K3J1,Q3UIU2,Q9CQH3,Q91WD5,P48771,Q9DCT2,Q99LC3,Q9DB41,P97478,P56135,Q9D6M3,Q8BK30,P52503,P00158
82	heterocycle biosynthetic process	GO:BP	0.000227378	Q8R3J4,Q9CPQ8,Q9CQJ8,Q9CQ75,Q9CPP6,Q9CQ91,Q9CPU2,Q99LY9,Q91WC3,Q9D6J5,Q9CQ54,Q8K3J1,Q3UIU2,Q9CQH3,Q91WD5,Q9DCT2,P67778,P41216,Q64373,Q99LC3,P97478,P56135,Q8BK30,P52503,P35487,O35129
82	energy derivation by oxidation of organic compounds	GO:BP	0.000235918	P99028,Q8BH59,Q9CQJ8,Q9CQ75,Q9CPP6,Q9CQ91,Q9CPU2,Q99LY9,Q9D6J5,Q9CQ54,Q8K3J1,Q3UIU2,Q9CQH3,Q91WD5,P48771,Q9DCT2,Q99LC3,Q9DB41,P97478,P56135,Q9D6M3,Q8BK30,P52503,P00158
82	organic cyclic compound biosynthetic process	GO:BP	0.000945566	Q8R3J4,Q9CPQ8,Q9CQJ8,Q9CQ75,Q9CPP6,Q9CQ91,Q9CPU2,Q99LY9,Q91WC3,Q9D6J5,Q9CQ54,Q8K3J1,Q3UIU2,Q9CQH3,Q91WD5,Q9DCT2,P67778,P41216,Q64373,Q99LC3,P97478,P56135,Q8BK30,P52503,P35487,O35129
82	aerobic respiration	GO:BP	0.00115609	P99028,Q9CQJ8,Q9CQ75,Q9CPP6,Q9CQ91,Q9CPU2,Q99LY9,Q9D6J5,Q9CQ54,Q8K3J1,Q3UIU2,Q9CQH3,Q91WD5,P48771,Q9DCT2,Q99LC3,P97478,P56135,Q8BK30,P52503,P00158
82	purine ribonucleotide metabolic process	GO:BP	0.00139496	Q9CPQ8,Q9CQJ8,Q9CQ75,Q9CPP6,Q9CQ91,Q9CPU2,Q99LY9,Q91WC3,Q9D6J5,Q9CQ54,Q8K3J1,Q3UIU2,Q9CQH3,Q91WD5,Q9DCT2,P41216,Q64373,Q99LC3,P56135,Q8BK30,P52503,P35487
82	purine nucleotide metabolic process	GO:BP	0.00157243	Q9CPQ8,Q9CQJ8,Q9CQ75,Q9CPP6,Q9CQ91,Q9CPU2,Q99LY9,Q91WC3,Q9D6J5,Q9CQ54,Q8K3J1,Q3UIU2,Q9CQH3,Q91WD5,Q9DCT2,P41216,Q64373,Q99LC3,P56135,Q8BK30,P52503,P35487
82	ribonucleotide metabolic process	GO:BP	0.00177053	Q9CPQ8,Q9CQJ8,Q9CQ75,Q9CPP6,Q9CQ91,Q9CPU2,Q99LY9,Q91WC3,Q9D6J5,Q9CQ54,Q8K3J1,Q3UIU2,Q9CQH3,Q91WD5,Q9DCT2,P41216,Q64373,Q99LC3,P56135,Q8BK30,P52503,P35487
82	ribose phosphate metabolic process	GO:BP	0.0019914	Q9CPQ8,Q9CQJ8,Q9CQ75,Q9CPP6,Q9CQ91,Q9CPU2,Q99LY9,Q91WC3,Q9D6J5,Q9CQ54,Q8K3J1,Q3UIU2,Q9CQH3,Q91WD5,Q9DCT2,P41216,Q64373,Q99LC3,P56135,Q8BK30,P52503,P35487
82	purine-containing compound metabolic process	GO:BP	0.0019914	Q9CPQ8,Q9CQJ8,Q9CQ75,Q9CPP6,Q9CQ91,Q9CPU2,Q99LY9,Q91WC3,Q9D6J5,Q9CQ54,Q8K3J1,Q3UIU2,Q9CQH3,Q91WD5,Q9DCT2,P41216,Q64373,Q99LC3,P56135,Q8BK30,P52503,P35487
82	mitochondrial respiratory chain complex assembly	GO:BP	0.00239121	Q9CQJ8,Q9CQ75,Q9CPP6,Q9CQ91,Q9CPU2,Q99LY9,Q9D6J5,Q9CQ54,Q8K3J1,Q3UIU2,Q9CQH3,Q91WD5,Q9DCT2,Q9D2R6,Q99LC3,P52503
82	phosphorus metabolic process	GO:BP	0.00248606	Q9CQV7,Q9CPQ8,Q9CQJ8,Q91VM9,Q9CQ75,Q9CPP6,Q9CQ91,Q9CPU2,Q64521,Q99LY9,Q91WC3,Q9D6J5,Q9CQ54,Q8K3J1,Q3UIU2,Q9CQH3,Q91WD5,Q9DCT2,P67778,P41216,Q64373,Q99LC3,P56135,Q8BK30,P52503,P35487,O35465,O35129
82	phosphate-containing compound metabolic process	GO:BP	0.00248606	Q9CQV7,Q9CPQ8,Q9CQJ8,Q91VM9,Q9CQ75,Q9CPP6,Q9CQ91,Q9CPU2,Q64521,Q99LY9,Q91WC3,Q9D6J5,Q9CQ54,Q8K3J1,Q3UIU2,Q9CQH3,Q91WD5,Q9DCT2,P67778,P41216,Q64373,Q99LC3,P56135,Q8BK30,P52503,P35487,O35465,O35129
82	electron transport chain	GO:BP	0.0025166	P99028,Q8BH59,Q9CPP6,Q921G7,Q8K3J1,Q3UIU2,Q91WD5,Q9DCT2,Q99LC3,Q9DB41,P97478,Q9D6M3,Q8BK30,P52503,P00158
82	carbohydrate derivative metabolic process	GO:BP	0.00342825	Q9CPQ8,Q9CQJ8,Q9CQ75,Q9CPP6,Q9CQ91,Q9CPU2,Q64521,Q99LY9,Q91WC3,Q9D6J5,Q9CQ54,Q8K3J1,Q3UIU2,Q9CQH3,Q91WD5,Q9DCT2,P41216,Q64373,Q99LC3,P56135,Q8BK30,P52503,P35487
82	respiratory electron transport chain	GO:BP	0.00732566	P99028,Q8BH59,Q9CPP6,Q8K3J1,Q3UIU2,Q91WD5,Q9DCT2,Q99LC3,Q9DB41,P97478,Q9D6M3,Q8BK30,P52503,P00158
82	organophosphate metabolic process	GO:BP	0.00769019	Q9CQV7,Q9CPQ8,Q9CQJ8,Q9CQ75,Q9CPP6,Q9CQ91,Q9CPU2,Q64521,Q99LY9,Q91WC3,Q9D6J5,Q9CQ54,Q8K3J1,Q3UIU2,Q9CQH3,Q91WD5,Q9DCT2,P41216,Q64373,Q99LC3,P56135,Q8BK30,P52503,P35487,O35129
82	nucleotide metabolic process	GO:BP	0.0274249	Q9CPQ8,Q9CQJ8,Q9CQ75,Q9CPP6,Q9CQ91,Q9CPU2,Q99LY9,Q91WC3,Q9D6J5,Q9CQ54,Q8K3J1,Q3UIU2,Q9CQH3,Q91WD5,Q9DCT2,P41216,Q64373,Q99LC3,P56135,Q8BK30,P52503,P35487
82	nucleoside phosphate metabolic process	GO:BP	0.0274249	Q9CPQ8,Q9CQJ8,Q9CQ75,Q9CPP6,Q9CQ91,Q9CPU2,Q99LY9,Q91WC3,Q9D6J5,Q9CQ54,Q8K3J1,Q3UIU2,Q9CQH3,Q91WD5,Q9DCT2,P41216,Q64373,Q99LC3,P56135,Q8BK30,P52503,P35487
82	nucleobase-containing small molecule metabolic process	GO:BP	0.0362279	Q9CPQ8,Q9CQJ8,Q9CQ75,Q9CPP6,Q9CQ91,Q9CPU2,Q99LY9,Q91WC3,Q9D6J5,Q9CQ54,Q8K3J1,Q3UIU2,Q9CQH3,Q91WD5,Q9DCT2,P41216,Q64373,Q99LC3,P56135,Q8BK30,P52503,P35487
83	proton motive force-driven mitochondrial ATP synthesis	GO:BP	9.6323e-08	Q9CQJ8,Q9CPP6,Q9CQZ6,Q9CQ91,Q9CPU2,Q99LY9,Q9CQ54,Q8K3J1,Q9CQH3,Q91WD5,Q9DCT2,Q99LC3,P56135
83	proton motive force-driven ATP synthesis	GO:BP	2.29095e-07	Q9CQJ8,Q9CPP6,Q9CQZ6,Q9CQ91,Q9CPU2,Q99LY9,Q9CQ54,Q8K3J1,Q9CQH3,Q91WD5,Q9DCT2,Q99LC3,P56135
83	mitochondrial respiratory chain complex I assembly	GO:BP	2.34732e-07	Q9CQJ8,Q9CPP6,Q9CQZ6,Q9CQ91,Q9CPU2,Q99LY9,Q9CQ54,Q8K3J1,Q9CQH3,Q91WD5,Q9DCT2,Q99LC3
83	NADH dehydrogenase complex assembly	GO:BP	2.34732e-07	Q9CQJ8,Q9CPP6,Q9CQZ6,Q9CQ91,Q9CPU2,Q99LY9,Q9CQ54,Q8K3J1,Q9CQH3,Q91WD5,Q9DCT2,Q99LC3
83	ribonucleoside triphosphate biosynthetic process	GO:BP	1.85437e-06	Q9CQJ8,Q9CPP6,Q9CQZ6,Q9CQ91,Q9CPU2,Q99LY9,Q9CQ54,Q8K3J1,Q9CQH3,Q91WD5,Q9DCT2,Q99LC3,P56135
83	purine ribonucleoside triphosphate biosynthetic process	GO:BP	1.85437e-06	Q9CQJ8,Q9CPP6,Q9CQZ6,Q9CQ91,Q9CPU2,Q99LY9,Q9CQ54,Q8K3J1,Q9CQH3,Q91WD5,Q9DCT2,Q99LC3,P56135
83	purine nucleoside triphosphate biosynthetic process	GO:BP	1.85437e-06	Q9CQJ8,Q9CPP6,Q9CQZ6,Q9CQ91,Q9CPU2,Q99LY9,Q9CQ54,Q8K3J1,Q9CQH3,Q91WD5,Q9DCT2,Q99LC3,P56135
83	ATP biosynthetic process	GO:BP	1.85437e-06	Q9CQJ8,Q9CPP6,Q9CQZ6,Q9CQ91,Q9CPU2,Q99LY9,Q9CQ54,Q8K3J1,Q9CQH3,Q91WD5,Q9DCT2,Q99LC3,P56135
83	nucleoside triphosphate biosynthetic process	GO:BP	2.20291e-06	Q9CQJ8,Q9CPP6,Q9CQZ6,Q9CQ91,Q9CPU2,Q99LY9,Q9CQ54,Q8K3J1,Q9CQH3,Q91WD5,Q9DCT2,Q99LC3,P56135
83	mitochondrial respiratory chain complex assembly	GO:BP	1.07994e-05	Q9CQJ8,Q9CPP6,Q9CQZ6,Q9CQ91,Q9CPU2,Q99LY9,Q9CQ54,Q8K3J1,Q9CQH3,Q91WD5,Q9DCT2,Q9D2R6,Q99LC3
83	ATP metabolic process	GO:BP	1.25101e-05	Q9CQJ8,Q9CPP6,Q9CQZ6,Q9CQ91,Q9CPU2,Q99LY9,Q9CQ54,Q8K3J1,Q9CQH3,Q91WD5,Q9DCT2,Q99LC3,P56135
83	purine ribonucleoside triphosphate metabolic process	GO:BP	1.66898e-05	Q9CQJ8,Q9CPP6,Q9CQZ6,Q9CQ91,Q9CPU2,Q99LY9,Q9CQ54,Q8K3J1,Q9CQH3,Q91WD5,Q9DCT2,Q99LC3,P56135
83	ribonucleoside triphosphate metabolic process	GO:BP	1.66898e-05	Q9CQJ8,Q9CPP6,Q9CQZ6,Q9CQ91,Q9CPU2,Q99LY9,Q9CQ54,Q8K3J1,Q9CQH3,Q91WD5,Q9DCT2,Q99LC3,P56135
83	purine nucleoside triphosphate metabolic process	GO:BP	1.66898e-05	Q9CQJ8,Q9CPP6,Q9CQZ6,Q9CQ91,Q9CPU2,Q99LY9,Q9CQ54,Q8K3J1,Q9CQH3,Q91WD5,Q9DCT2,Q99LC3,P56135
83	nucleoside triphosphate metabolic process	GO:BP	2.21004e-05	Q9CQJ8,Q9CPP6,Q9CQZ6,Q9CQ91,Q9CPU2,Q99LY9,Q9CQ54,Q8K3J1,Q9CQH3,Q91WD5,Q9DCT2,Q99LC3,P56135
83	generation of precursor metabolites and energy	GO:BP	5.11953e-05	Q8BH59,Q9CQJ8,Q9CPP6,Q921G7,Q9CQZ6,Q9CQ91,Q9CPU2,Q99LY9,Q9CQ54,Q8K3J1,Q9CQH3,Q91WD5,Q9DCT2,Q99LC3,Q9DB41,P56135,O35129
83	purine nucleotide biosynthetic process	GO:BP	9.19182e-05	Q9CQJ8,Q9CPP6,Q9CQZ6,Q9CQ91,Q9CPU2,Q99LY9,Q9CQ54,Q8K3J1,Q9CQH3,Q91WD5,Q9DCT2,Q99LC3,P56135
83	purine ribonucleotide biosynthetic process	GO:BP	9.19182e-05	Q9CQJ8,Q9CPP6,Q9CQZ6,Q9CQ91,Q9CPU2,Q99LY9,Q9CQ54,Q8K3J1,Q9CQH3,Q91WD5,Q9DCT2,Q99LC3,P56135
83	purine-containing compound biosynthetic process	GO:BP	0.000103695	Q9CQJ8,Q9CPP6,Q9CQZ6,Q9CQ91,Q9CPU2,Q99LY9,Q9CQ54,Q8K3J1,Q9CQH3,Q91WD5,Q9DCT2,Q99LC3,P56135
83	ribose phosphate biosynthetic process	GO:BP	0.00011682	Q9CQJ8,Q9CPP6,Q9CQZ6,Q9CQ91,Q9CPU2,Q99LY9,Q9CQ54,Q8K3J1,Q9CQH3,Q91WD5,Q9DCT2,Q99LC3,P56135
83	ribonucleotide biosynthetic process	GO:BP	0.00011682	Q9CQJ8,Q9CPP6,Q9CQZ6,Q9CQ91,Q9CPU2,Q99LY9,Q9CQ54,Q8K3J1,Q9CQH3,Q91WD5,Q9DCT2,Q99LC3,P56135
83	carbohydrate derivative biosynthetic process	GO:BP	0.000259491	Q9CQJ8,Q9CPP6,Q9CQZ6,Q9CQ91,Q9CPU2,Q99LY9,Q9CQ54,Q8K3J1,Q9CQH3,Q91WD5,Q9DCT2,Q99LC3,P56135
83	nucleotide biosynthetic process	GO:BP	0.000289414	Q9CQJ8,Q9CPP6,Q9CQZ6,Q9CQ91,Q9CPU2,Q99LY9,Q9CQ54,Q8K3J1,Q9CQH3,Q91WD5,Q9DCT2,Q99LC3,P56135
83	nucleoside phosphate biosynthetic process	GO:BP	0.000289414	Q9CQJ8,Q9CPP6,Q9CQZ6,Q9CQ91,Q9CPU2,Q99LY9,Q9CQ54,Q8K3J1,Q9CQH3,Q91WD5,Q9DCT2,Q99LC3,P56135
83	oxidative phosphorylation	GO:BP	0.000322417	Q9CQJ8,Q9CPP6,Q9CQZ6,Q9CQ91,Q9CPU2,Q99LY9,Q9CQ54,Q8K3J1,Q9CQH3,Q91WD5,Q9DCT2,Q99LC3,P56135
83	cellular respiration	GO:BP	0.000472576	Q8BH59,Q9CQJ8,Q9CPP6,Q9CQZ6,Q9CQ91,Q9CPU2,Q99LY9,Q9CQ54,Q8K3J1,Q9CQH3,Q91WD5,Q9DCT2,Q99LC3,Q9DB41,P56135
83	energy derivation by oxidation of organic compounds	GO:BP	0.000514004	Q8BH59,Q9CQJ8,Q9CPP6,Q9CQZ6,Q9CQ91,Q9CPU2,Q99LY9,Q9CQ54,Q8K3J1,Q9CQH3,Q91WD5,Q9DCT2,Q99LC3,Q9DB41,P56135
83	organophosphate metabolic process	GO:BP	0.00225743	Q9CQV7,Q9CQJ8,Q9CPP6,Q9CQZ6,Q9CQ91,Q9CPU2,Q64521,Q99LY9,Q9CQ54,Q8K3J1,Q9CQH3,Q91WD5,Q9DCT2,Q99LC3,P56135,O35129
83	organophosphate biosynthetic process	GO:BP	0.00246649	Q9CQJ8,Q9CPP6,Q9CQZ6,Q9CQ91,Q9CPU2,Q99LY9,Q9CQ54,Q8K3J1,Q9CQH3,Q91WD5,Q9DCT2,Q99LC3,P56135
83	aerobic respiration	GO:BP	0.00347877	Q9CQJ8,Q9CPP6,Q9CQZ6,Q9CQ91,Q9CPU2,Q99LY9,Q9CQ54,Q8K3J1,Q9CQH3,Q91WD5,Q9DCT2,Q99LC3,P56135
83	nucleobase-containing compound biosynthetic process	GO:BP	0.00433445	Q9CQJ8,Q9CPP6,Q9CQZ6,Q9CQ91,Q9CPU2,Q99LY9,Q9CQ54,Q8K3J1,Q9CQH3,Q91WD5,Q9DCT2,Q99LC3,P56135,O35129
83	carbohydrate derivative metabolic process	GO:BP	0.00776192	Q9CQJ8,Q9CPP6,Q9CQZ6,Q9CQ91,Q9CPU2,Q64521,Q99LY9,Q9CQ54,Q8K3J1,Q9CQH3,Q91WD5,Q9DCT2,Q99LC3,P56135
83	purine ribonucleotide metabolic process	GO:BP	0.0105939	Q9CQJ8,Q9CPP6,Q9CQZ6,Q9CQ91,Q9CPU2,Q99LY9,Q9CQ54,Q8K3J1,Q9CQH3,Q91WD5,Q9DCT2,Q99LC3,P56135
83	purine nucleotide metabolic process	GO:BP	0.0114149	Q9CQJ8,Q9CPP6,Q9CQZ6,Q9CQ91,Q9CPU2,Q99LY9,Q9CQ54,Q8K3J1,Q9CQH3,Q91WD5,Q9DCT2,Q99LC3,P56135
83	mitochondrion organization	GO:BP	0.0116877	Q9CQV7,Q9CQJ8,Q9CPP6,Q9CQZ6,Q9CQ91,Q9CPU2,Q99LY9,Q9CQ54,Q8K3J1,Q9CQH3,Q91WD5,Q5U458,Q9DCT2,Q9D2R6,Q99LC3,O88741,O35129
83	ribonucleotide metabolic process	GO:BP	0.0122922	Q9CQJ8,Q9CPP6,Q9CQZ6,Q9CQ91,Q9CPU2,Q99LY9,Q9CQ54,Q8K3J1,Q9CQH3,Q91WD5,Q9DCT2,Q99LC3,P56135
83	purine-containing compound metabolic process	GO:BP	0.0132289	Q9CQJ8,Q9CPP6,Q9CQZ6,Q9CQ91,Q9CPU2,Q99LY9,Q9CQ54,Q8K3J1,Q9CQH3,Q91WD5,Q9DCT2,Q99LC3,P56135
83	ribose phosphate metabolic process	GO:BP	0.0132289	Q9CQJ8,Q9CPP6,Q9CQZ6,Q9CQ91,Q9CPU2,Q99LY9,Q9CQ54,Q8K3J1,Q9CQH3,Q91WD5,Q9DCT2,Q99LC3,P56135
83	phosphate-containing compound metabolic process	GO:BP	0.0162832	Q9CQV7,Q9CQJ8,Q9CPP6,Q9CQZ6,Q9CQ91,Q9CPU2,Q64521,Q99LY9,Q9CQ54,Q8K3J1,Q9CQH3,Q91WD5,Q9DCT2,Q99LC3,P56135,O35129
83	phosphorus metabolic process	GO:BP	0.0162832	Q9CQV7,Q9CQJ8,Q9CPP6,Q9CQZ6,Q9CQ91,Q9CPU2,Q64521,Q99LY9,Q9CQ54,Q8K3J1,Q9CQH3,Q91WD5,Q9DCT2,Q99LC3,P56135,O35129
83	aromatic compound biosynthetic process	GO:BP	0.0175076	Q9CQJ8,Q9CPP6,Q9CQZ6,Q9CQ91,Q9CPU2,Q99LY9,Q9CQ54,Q8K3J1,Q9CQH3,Q91WD5,Q9DCT2,Q99LC3,P56135,O35129
83	protein-containing complex assembly	GO:BP	0.018933	Q9CQJ8,Q9CPP6,Q9CQZ6,Q9CQ91,Q9CPU2,Q99LY9,Q9CQ54,Q8K3J1,Q9CQH3,Q91WD5,Q9DCT2,Q9D2R6,Q99LC3
83	heterocycle biosynthetic process	GO:BP	0.0226244	Q9CQJ8,Q9CPP6,Q9CQZ6,Q9CQ91,Q9CPU2,Q99LY9,Q9CQ54,Q8K3J1,Q9CQH3,Q91WD5,Q9DCT2,Q99LC3,P56135,O35129
83	protein-containing complex organization	GO:BP	0.0267239	Q9CQJ8,Q9CPP6,Q9CQZ6,Q9CQ91,Q9CPU2,Q99LY9,Q9CQ54,Q8K3J1,Q9CQH3,Q91WD5,Q9DCT2,Q9D2R6,Q99LC3
83	organic cyclic compound biosynthetic process	GO:BP	0.049719	Q9CQJ8,Q9CPP6,Q9CQZ6,Q9CQ91,Q9CPU2,Q99LY9,Q9CQ54,Q8K3J1,Q9CQH3,Q91WD5,Q9DCT2,Q99LC3,P56135,O35129
86	proton motive force-driven ATP synthesis	GO:BP	6.42401e-07	Q9CPQ8,Q9CQ91,Q9CPU2,Q99LY9,Q9CQ54,Q8K3J1,Q9CQH3,Q91WD5,Q9DCT2,Q99LC3,P56135,Q7TMF3
86	purine nucleoside triphosphate biosynthetic process	GO:BP	4.39615e-06	Q9CPQ8,Q9CQ91,Q9CPU2,Q99LY9,Q9CQ54,Q8K3J1,Q9CQH3,Q91WD5,Q9DCT2,Q99LC3,P56135,Q7TMF3
86	purine ribonucleoside triphosphate biosynthetic process	GO:BP	4.39615e-06	Q9CPQ8,Q9CQ91,Q9CPU2,Q99LY9,Q9CQ54,Q8K3J1,Q9CQH3,Q91WD5,Q9DCT2,Q99LC3,P56135,Q7TMF3
86	ATP biosynthetic process	GO:BP	4.39615e-06	Q9CPQ8,Q9CQ91,Q9CPU2,Q99LY9,Q9CQ54,Q8K3J1,Q9CQH3,Q91WD5,Q9DCT2,Q99LC3,P56135,Q7TMF3
86	ribonucleoside triphosphate biosynthetic process	GO:BP	4.39615e-06	Q9CPQ8,Q9CQ91,Q9CPU2,Q99LY9,Q9CQ54,Q8K3J1,Q9CQH3,Q91WD5,Q9DCT2,Q99LC3,P56135,Q7TMF3
86	nucleoside triphosphate biosynthetic process	GO:BP	5.15181e-06	Q9CPQ8,Q9CQ91,Q9CPU2,Q99LY9,Q9CQ54,Q8K3J1,Q9CQH3,Q91WD5,Q9DCT2,Q99LC3,P56135,Q7TMF3
86	proton motive force-driven mitochondrial ATP synthesis	GO:BP	5.53701e-06	Q9CQ91,Q9CPU2,Q99LY9,Q9CQ54,Q8K3J1,Q9CQH3,Q91WD5,Q9DCT2,Q99LC3,P56135,Q7TMF3
86	ATP metabolic process	GO:BP	2.55508e-05	Q9CPQ8,Q9CQ91,Q9CPU2,Q99LY9,Q9CQ54,Q8K3J1,Q9CQH3,Q91WD5,Q9DCT2,Q99LC3,P56135,Q7TMF3
86	ribonucleoside triphosphate metabolic process	GO:BP	3.33406e-05	Q9CPQ8,Q9CQ91,Q9CPU2,Q99LY9,Q9CQ54,Q8K3J1,Q9CQH3,Q91WD5,Q9DCT2,Q99LC3,P56135,Q7TMF3
86	purine ribonucleoside triphosphate metabolic process	GO:BP	3.33406e-05	Q9CPQ8,Q9CQ91,Q9CPU2,Q99LY9,Q9CQ54,Q8K3J1,Q9CQH3,Q91WD5,Q9DCT2,Q99LC3,P56135,Q7TMF3
86	purine nucleoside triphosphate metabolic process	GO:BP	3.33406e-05	Q9CPQ8,Q9CQ91,Q9CPU2,Q99LY9,Q9CQ54,Q8K3J1,Q9CQH3,Q91WD5,Q9DCT2,Q99LC3,P56135,Q7TMF3
86	nucleoside triphosphate metabolic process	GO:BP	4.32108e-05	Q9CPQ8,Q9CQ91,Q9CPU2,Q99LY9,Q9CQ54,Q8K3J1,Q9CQH3,Q91WD5,Q9DCT2,Q99LC3,P56135,Q7TMF3
86	purine ribonucleotide biosynthetic process	GO:BP	0.000161377	Q9CPQ8,Q9CQ91,Q9CPU2,Q99LY9,Q9CQ54,Q8K3J1,Q9CQH3,Q91WD5,Q9DCT2,Q99LC3,P56135,Q7TMF3
86	purine nucleotide biosynthetic process	GO:BP	0.000161377	Q9CPQ8,Q9CQ91,Q9CPU2,Q99LY9,Q9CQ54,Q8K3J1,Q9CQH3,Q91WD5,Q9DCT2,Q99LC3,P56135,Q7TMF3
86	purine-containing compound biosynthetic process	GO:BP	0.000180422	Q9CPQ8,Q9CQ91,Q9CPU2,Q99LY9,Q9CQ54,Q8K3J1,Q9CQH3,Q91WD5,Q9DCT2,Q99LC3,P56135,Q7TMF3
86	ribonucleotide biosynthetic process	GO:BP	0.000201463	Q9CPQ8,Q9CQ91,Q9CPU2,Q99LY9,Q9CQ54,Q8K3J1,Q9CQH3,Q91WD5,Q9DCT2,Q99LC3,P56135,Q7TMF3
86	ribose phosphate biosynthetic process	GO:BP	0.000201463	Q9CPQ8,Q9CQ91,Q9CPU2,Q99LY9,Q9CQ54,Q8K3J1,Q9CQH3,Q91WD5,Q9DCT2,Q99LC3,P56135,Q7TMF3
86	mitochondrial respiratory chain complex I assembly	GO:BP	0.000279717	Q9CQ91,Q9CPU2,Q99LY9,Q9CQ54,Q8K3J1,Q9CQH3,Q91WD5,Q9DCT2,Q99LC3
86	NADH dehydrogenase complex assembly	GO:BP	0.000279717	Q9CQ91,Q9CPU2,Q99LY9,Q9CQ54,Q8K3J1,Q9CQH3,Q91WD5,Q9DCT2,Q99LC3
86	generation of precursor metabolites and energy	GO:BP	0.00034531	Q8BH59,Q921G7,Q9CQ91,Q9CPU2,Q99LY9,Q9CQ54,Q8K3J1,Q9CQH3,Q91WD5,Q61387,Q9DCT2,Q99LC3,P56135,Q7TMF3,O35129
86	carbohydrate derivative biosynthetic process	GO:BP	0.000421885	Q9CPQ8,Q9CQ91,Q9CPU2,Q99LY9,Q9CQ54,Q8K3J1,Q9CQH3,Q91WD5,Q9DCT2,Q99LC3,P56135,Q7TMF3
86	nucleotide biosynthetic process	GO:BP	0.000466786	Q9CPQ8,Q9CQ91,Q9CPU2,Q99LY9,Q9CQ54,Q8K3J1,Q9CQH3,Q91WD5,Q9DCT2,Q99LC3,P56135,Q7TMF3
86	nucleoside phosphate biosynthetic process	GO:BP	0.000466786	Q9CPQ8,Q9CQ91,Q9CPU2,Q99LY9,Q9CQ54,Q8K3J1,Q9CQH3,Q91WD5,Q9DCT2,Q99LC3,P56135,Q7TMF3
86	oxidative phosphorylation	GO:BP	0.000515923	Q9CQ91,Q9CPU2,Q99LY9,Q9CQ54,Q8K3J1,Q9CQH3,Q91WD5,Q61387,Q9DCT2,Q99LC3,P56135,Q7TMF3
86	organophosphate metabolic process	GO:BP	0.00169737	Q9CQV7,Q9CPQ8,Q9CQ91,Q9CPU2,Q64521,Q99LY9,Q9CQ54,Q8K3J1,Q9CQH3,Q91WD5,Q9DCT2,Q99LC3,P56135,Q7TMF3,O35129
86	organophosphate biosynthetic process	GO:BP	0.00341128	Q9CPQ8,Q9CQ91,Q9CPU2,Q99LY9,Q9CQ54,Q8K3J1,Q9CQH3,Q91WD5,Q9DCT2,Q99LC3,P56135,Q7TMF3
86	cellular respiration	GO:BP	0.00381378	Q8BH59,Q9CQ91,Q9CPU2,Q99LY9,Q9CQ54,Q8K3J1,Q9CQH3,Q91WD5,Q61387,Q9DCT2,Q99LC3,P56135,Q7TMF3
86	energy derivation by oxidation of organic compounds	GO:BP	0.00409781	Q8BH59,Q9CQ91,Q9CPU2,Q99LY9,Q9CQ54,Q8K3J1,Q9CQH3,Q91WD5,Q61387,Q9DCT2,Q99LC3,P56135,Q7TMF3
86	aerobic respiration	GO:BP	0.00469706	Q9CQ91,Q9CPU2,Q99LY9,Q9CQ54,Q8K3J1,Q9CQH3,Q91WD5,Q61387,Q9DCT2,Q99LC3,P56135,Q7TMF3
86	nucleobase-containing compound biosynthetic process	GO:BP	0.0047234	Q9CPQ8,Q9CQ91,Q9CPU2,Q99LY9,Q9CQ54,Q8K3J1,Q9CQH3,Q91WD5,Q9DCT2,Q99LC3,P56135,Q7TMF3,O35129
86	carbohydrate derivative metabolic process	GO:BP	0.00817096	Q9CPQ8,Q9CQ91,Q9CPU2,Q64521,Q99LY9,Q9CQ54,Q8K3J1,Q9CQH3,Q91WD5,Q9DCT2,Q99LC3,P56135,Q7TMF3
86	phosphate-containing compound metabolic process	GO:BP	0.0112707	Q9CQV7,Q9CPQ8,Q9CQ91,Q9CPU2,Q64521,Q99LY9,Q9CQ54,Q8K3J1,Q9CQH3,Q91WD5,Q9DCT2,Q99LC3,P56135,Q7TMF3,O35129
86	phosphorus metabolic process	GO:BP	0.0112707	Q9CQV7,Q9CPQ8,Q9CQ91,Q9CPU2,Q64521,Q99LY9,Q9CQ54,Q8K3J1,Q9CQH3,Q91WD5,Q9DCT2,Q99LC3,P56135,Q7TMF3,O35129
86	purine ribonucleotide metabolic process	GO:BP	0.013251	Q9CPQ8,Q9CQ91,Q9CPU2,Q99LY9,Q9CQ54,Q8K3J1,Q9CQH3,Q91WD5,Q9DCT2,Q99LC3,P56135,Q7TMF3
86	purine nucleotide metabolic process	GO:BP	0.0142062	Q9CPQ8,Q9CQ91,Q9CPU2,Q99LY9,Q9CQ54,Q8K3J1,Q9CQH3,Q91WD5,Q9DCT2,Q99LC3,P56135,Q7TMF3
86	ribonucleotide metabolic process	GO:BP	0.0152217	Q9CPQ8,Q9CQ91,Q9CPU2,Q99LY9,Q9CQ54,Q8K3J1,Q9CQH3,Q91WD5,Q9DCT2,Q99LC3,P56135,Q7TMF3
86	ribose phosphate metabolic process	GO:BP	0.0163009	Q9CPQ8,Q9CQ91,Q9CPU2,Q99LY9,Q9CQ54,Q8K3J1,Q9CQH3,Q91WD5,Q9DCT2,Q99LC3,P56135,Q7TMF3
86	purine-containing compound metabolic process	GO:BP	0.0163009	Q9CPQ8,Q9CQ91,Q9CPU2,Q99LY9,Q9CQ54,Q8K3J1,Q9CQH3,Q91WD5,Q9DCT2,Q99LC3,P56135,Q7TMF3
86	aromatic compound biosynthetic process	GO:BP	0.0175826	Q9CPQ8,Q9CQ91,Q9CPU2,Q99LY9,Q9CQ54,Q8K3J1,Q9CQH3,Q91WD5,Q9DCT2,Q99LC3,P56135,Q7TMF3,O35129
86	heterocycle biosynthetic process	GO:BP	0.0223936	Q9CPQ8,Q9CQ91,Q9CPU2,Q99LY9,Q9CQ54,Q8K3J1,Q9CQH3,Q91WD5,Q9DCT2,Q99LC3,P56135,Q7TMF3,O35129
86	mitochondrial respiratory chain complex assembly	GO:BP	0.0247244	Q9CQ91,Q9CPU2,Q99LY9,Q9CQ54,Q8K3J1,Q9CQH3,Q91WD5,Q9DCT2,Q99LC3
86	organic cyclic compound biosynthetic process	GO:BP	0.0471124	Q9CPQ8,Q9CQ91,Q9CPU2,Q99LY9,Q9CQ54,Q8K3J1,Q9CQH3,Q91WD5,Q9DCT2,Q99LC3,P56135,Q7TMF3,O35129
98	proton motive force-driven ATP synthesis	GO:BP	1.59387e-06	Q9DCJ5,Q9D6J6,Q9CQQ7,Q9CPQ8,Q9CQJ8,Q9CPP6,Q91YT0,Q99LY9,Q8K3J1,Q91WD5,Q9DCT2,Q9DC69,P56135,Q7TMF3,Q8BK30
98	purine nucleotide biosynthetic process	GO:BP	2.75473e-06	Q9DCJ5,Q9D6J6,Q9CQQ7,Q9CPQ8,P63030,Q9CQJ8,Q9CPP6,Q91YT0,Q99LY9,Q8K3J1,Q91WD5,Q9DCT2,P41216,Q9DC69,P56135,Q99J39,Q7TMF3,Q8BK30
98	purine ribonucleotide biosynthetic process	GO:BP	2.75473e-06	Q9DCJ5,Q9D6J6,Q9CQQ7,Q9CPQ8,P63030,Q9CQJ8,Q9CPP6,Q91YT0,Q99LY9,Q8K3J1,Q91WD5,Q9DCT2,P41216,Q9DC69,P56135,Q99J39,Q7TMF3,Q8BK30
98	purine-containing compound biosynthetic process	GO:BP	3.2591e-06	Q9DCJ5,Q9D6J6,Q9CQQ7,Q9CPQ8,P63030,Q9CQJ8,Q9CPP6,Q91YT0,Q99LY9,Q8K3J1,Q91WD5,Q9DCT2,P41216,Q9DC69,P56135,Q99J39,Q7TMF3,Q8BK30
98	ribose phosphate biosynthetic process	GO:BP	3.84809e-06	Q9DCJ5,Q9D6J6,Q9CQQ7,Q9CPQ8,P63030,Q9CQJ8,Q9CPP6,Q91YT0,Q99LY9,Q8K3J1,Q91WD5,Q9DCT2,P41216,Q9DC69,P56135,Q99J39,Q7TMF3,Q8BK30
98	ribonucleotide biosynthetic process	GO:BP	3.84809e-06	Q9DCJ5,Q9D6J6,Q9CQQ7,Q9CPQ8,P63030,Q9CQJ8,Q9CPP6,Q91YT0,Q99LY9,Q8K3J1,Q91WD5,Q9DCT2,P41216,Q9DC69,P56135,Q99J39,Q7TMF3,Q8BK30
98	proton motive force-driven mitochondrial ATP synthesis	GO:BP	7.19618e-06	Q9DCJ5,Q9D6J6,Q9CQQ7,Q9CQJ8,Q9CPP6,Q91YT0,Q99LY9,Q8K3J1,Q91WD5,Q9DCT2,Q9DC69,P56135,Q7TMF3,Q8BK30
98	carbohydrate derivative biosynthetic process	GO:BP	1.16753e-05	Q9DCJ5,Q9D6J6,Q9CQQ7,Q9CPQ8,P63030,Q9CQJ8,Q9CPP6,Q91YT0,Q99LY9,Q8K3J1,Q91WD5,Q9DCT2,P41216,Q9DC69,P56135,Q99J39,Q7TMF3,Q8BK30
98	nucleoside phosphate biosynthetic process	GO:BP	1.35842e-05	Q9DCJ5,Q9D6J6,Q9CQQ7,Q9CPQ8,P63030,Q9CQJ8,Q9CPP6,Q91YT0,Q99LY9,Q8K3J1,Q91WD5,Q9DCT2,P41216,Q9DC69,P56135,Q99J39,Q7TMF3,Q8BK30
98	nucleotide biosynthetic process	GO:BP	1.35842e-05	Q9DCJ5,Q9D6J6,Q9CQQ7,Q9CPQ8,P63030,Q9CQJ8,Q9CPP6,Q91YT0,Q99LY9,Q8K3J1,Q91WD5,Q9DCT2,P41216,Q9DC69,P56135,Q99J39,Q7TMF3,Q8BK30
98	ATP biosynthetic process	GO:BP	1.68083e-05	Q9DCJ5,Q9D6J6,Q9CQQ7,Q9CPQ8,Q9CQJ8,Q9CPP6,Q91YT0,Q99LY9,Q8K3J1,Q91WD5,Q9DCT2,Q9DC69,P56135,Q7TMF3,Q8BK30
98	ribonucleoside triphosphate biosynthetic process	GO:BP	1.68083e-05	Q9DCJ5,Q9D6J6,Q9CQQ7,Q9CPQ8,Q9CQJ8,Q9CPP6,Q91YT0,Q99LY9,Q8K3J1,Q91WD5,Q9DCT2,Q9DC69,P56135,Q7TMF3,Q8BK30
98	purine nucleoside triphosphate biosynthetic process	GO:BP	1.68083e-05	Q9DCJ5,Q9D6J6,Q9CQQ7,Q9CPQ8,Q9CQJ8,Q9CPP6,Q91YT0,Q99LY9,Q8K3J1,Q91WD5,Q9DCT2,Q9DC69,P56135,Q7TMF3,Q8BK30
98	purine ribonucleoside triphosphate biosynthetic process	GO:BP	1.68083e-05	Q9DCJ5,Q9D6J6,Q9CQQ7,Q9CPQ8,Q9CQJ8,Q9CPP6,Q91YT0,Q99LY9,Q8K3J1,Q91WD5,Q9DCT2,Q9DC69,P56135,Q7TMF3,Q8BK30
98	nucleoside triphosphate biosynthetic process	GO:BP	2.0382e-05	Q9DCJ5,Q9D6J6,Q9CQQ7,Q9CPQ8,Q9CQJ8,Q9CPP6,Q91YT0,Q99LY9,Q8K3J1,Q91WD5,Q9DCT2,Q9DC69,P56135,Q7TMF3,Q8BK30
98	purine nucleoside triphosphate metabolic process	GO:BP	2.36531e-05	Q9DCJ5,Q9D6J6,Q9CQQ7,Q9CPQ8,Q9CQJ8,Q9CPP6,Q91YT0,Q99LY9,Q8K3J1,Q91WD5,P58281,Q9DCT2,Q9DC69,P56135,Q7TMF3,Q8BK30
98	purine ribonucleoside triphosphate metabolic process	GO:BP	2.36531e-05	Q9DCJ5,Q9D6J6,Q9CQQ7,Q9CPQ8,Q9CQJ8,Q9CPP6,Q91YT0,Q99LY9,Q8K3J1,Q91WD5,P58281,Q9DCT2,Q9DC69,P56135,Q7TMF3,Q8BK30
98	ribonucleoside triphosphate metabolic process	GO:BP	2.36531e-05	Q9DCJ5,Q9D6J6,Q9CQQ7,Q9CPQ8,Q9CQJ8,Q9CPP6,Q91YT0,Q99LY9,Q8K3J1,Q91WD5,P58281,Q9DCT2,Q9DC69,P56135,Q7TMF3,Q8BK30
98	nucleoside triphosphate metabolic process	GO:BP	3.3155e-05	Q9DCJ5,Q9D6J6,Q9CQQ7,Q9CPQ8,Q9CQJ8,Q9CPP6,Q91YT0,Q99LY9,Q8K3J1,Q91WD5,P58281,Q9DCT2,Q9DC69,P56135,Q7TMF3,Q8BK30
98	phosphorus metabolic process	GO:BP	4.84024e-05	Q9DCJ5,Q9D6J6,Q9CQQ7,Q9CPQ8,P63030,Q9CQJ8,Q91VM9,Q9CPP6,Q91YT0,Q64521,Q99LY9,Q8K3J1,Q91WD5,P58281,Q9DCT2,P67778,P41216,Q9DC69,Q9D880,P56135,Q99J39,Q7TMF3,Q8BK30,O35465,O35129
98	phosphate-containing compound metabolic process	GO:BP	4.84024e-05	Q9DCJ5,Q9D6J6,Q9CQQ7,Q9CPQ8,P63030,Q9CQJ8,Q91VM9,Q9CPP6,Q91YT0,Q64521,Q99LY9,Q8K3J1,Q91WD5,P58281,Q9DCT2,P67778,P41216,Q9DC69,Q9D880,P56135,Q99J39,Q7TMF3,Q8BK30,O35465,O35129
98	oxidative phosphorylation	GO:BP	0.000119047	Q9DCJ5,Q9D6J6,Q8R1I1,P99028,Q9CQQ7,Q9CQJ8,Q9CPP6,Q91YT0,Q99LY9,Q8K3J1,Q91WD5,Q9DCT2,Q9DC69,Q8K1Z0,P56135,Q7TMF3,Q8BK30
98	ATP metabolic process	GO:BP	0.000140775	Q9DCJ5,Q9D6J6,Q9CQQ7,Q9CPQ8,Q9CQJ8,Q9CPP6,Q91YT0,Q99LY9,Q8K3J1,Q91WD5,Q9DCT2,Q9DC69,P56135,Q7TMF3,Q8BK30
98	nucleobase-containing compound biosynthetic process	GO:BP	0.000223732	Q9DCJ5,Q9D6J6,Q9CQQ7,Q9CPQ8,P63030,Q9CQJ8,Q9CPP6,Q91YT0,Q99LY9,Q8K3J1,Q91WD5,Q9DCT2,P67778,P41216,Q9DC69,P56135,Q99J39,Q7TMF3,Q8BK30,O35129
98	organophosphate biosynthetic process	GO:BP	0.00026093	Q9DCJ5,Q9D6J6,Q9CQQ7,Q9CPQ8,P63030,Q9CQJ8,Q9CPP6,Q91YT0,Q99LY9,Q8K3J1,Q91WD5,Q9DCT2,P41216,Q9DC69,P56135,Q99J39,Q7TMF3,Q8BK30
98	purine ribonucleotide metabolic process	GO:BP	0.000331091	Q9DCJ5,Q9D6J6,Q9CQQ7,Q9CPQ8,P63030,Q9CQJ8,Q9CPP6,Q91YT0,Q99LY9,Q8K3J1,Q91WD5,P58281,Q9DCT2,P41216,Q9DC69,P56135,Q99J39,Q7TMF3,Q8BK30
98	purine nucleotide metabolic process	GO:BP	0.000369473	Q9DCJ5,Q9D6J6,Q9CQQ7,Q9CPQ8,P63030,Q9CQJ8,Q9CPP6,Q91YT0,Q99LY9,Q8K3J1,Q91WD5,P58281,Q9DCT2,P41216,Q9DC69,P56135,Q99J39,Q7TMF3,Q8BK30
98	ribonucleotide metabolic process	GO:BP	0.000411921	Q9DCJ5,Q9D6J6,Q9CQQ7,Q9CPQ8,P63030,Q9CQJ8,Q9CPP6,Q91YT0,Q99LY9,Q8K3J1,Q91WD5,P58281,Q9DCT2,P41216,Q9DC69,P56135,Q99J39,Q7TMF3,Q8BK30
98	purine-containing compound metabolic process	GO:BP	0.000458826	Q9DCJ5,Q9D6J6,Q9CQQ7,Q9CPQ8,P63030,Q9CQJ8,Q9CPP6,Q91YT0,Q99LY9,Q8K3J1,Q91WD5,P58281,Q9DCT2,P41216,Q9DC69,P56135,Q99J39,Q7TMF3,Q8BK30
98	ribose phosphate metabolic process	GO:BP	0.000458826	Q9DCJ5,Q9D6J6,Q9CQQ7,Q9CPQ8,P63030,Q9CQJ8,Q9CPP6,Q91YT0,Q99LY9,Q8K3J1,Q91WD5,P58281,Q9DCT2,P41216,Q9DC69,P56135,Q99J39,Q7TMF3,Q8BK30
98	carbohydrate derivative metabolic process	GO:BP	0.000511632	Q9DCJ5,Q9D6J6,Q9CQQ7,Q9CPQ8,P63030,Q9CQJ8,Q9CPP6,Q91YT0,Q64521,Q99LY9,Q8K3J1,Q91WD5,P58281,Q9DCT2,P41216,Q9DC69,P56135,Q99J39,Q7TMF3,Q8BK30
98	aromatic compound biosynthetic process	GO:BP	0.00161674	Q9DCJ5,Q9D6J6,Q9CQQ7,Q9CPQ8,P63030,Q9CQJ8,Q9CPP6,Q91YT0,Q99LY9,Q8K3J1,Q91WD5,Q9DCT2,P67778,P41216,Q9DC69,P56135,Q99J39,Q7TMF3,Q8BK30,O35129
98	generation of precursor metabolites and energy	GO:BP	0.00177143	Q9DCJ5,Q9D6J6,Q8R1I1,P99028,Q9CQQ7,Q9CQJ8,Q9CPP6,Q91YT0,Q99LY9,Q8K3J1,Q91WD5,Q9DCT2,Q9DC69,Q62425,Q8K1R3,Q8K1Z0,P56135,Q7TMF3,Q8BK30,O35129
98	heterocycle biosynthetic process	GO:BP	0.00232101	Q9DCJ5,Q9D6J6,Q9CQQ7,Q9CPQ8,P63030,Q9CQJ8,Q9CPP6,Q91YT0,Q99LY9,Q8K3J1,Q91WD5,Q9DCT2,P67778,P41216,Q9DC69,P56135,Q99J39,Q7TMF3,Q8BK30,O35129
98	aerobic respiration	GO:BP	0.0024533	Q9DCJ5,Q9D6J6,Q8R1I1,P99028,Q9CQQ7,Q9CQJ8,Q9CPP6,Q91YT0,Q99LY9,Q8K3J1,Q91WD5,Q9DCT2,Q9DC69,Q8K1Z0,P56135,Q7TMF3,Q8BK30
98	organophosphate metabolic process	GO:BP	0.00261383	Q9DCJ5,Q9D6J6,Q9CQQ7,Q9CPQ8,P63030,Q9CQJ8,Q9CPP6,Q91YT0,Q64521,Q99LY9,Q8K3J1,Q91WD5,P58281,Q9DCT2,P41216,Q9DC69,P56135,Q99J39,Q7TMF3,Q8BK30,O35129
98	cellular respiration	GO:BP	0.005064	Q9DCJ5,Q9D6J6,Q8R1I1,P99028,Q9CQQ7,Q9CQJ8,Q9CPP6,Q91YT0,Q99LY9,Q8K3J1,Q91WD5,Q9DCT2,Q9DC69,Q8K1R3,Q8K1Z0,P56135,Q7TMF3,Q8BK30
98	nucleoside phosphate metabolic process	GO:BP	0.00521306	Q9DCJ5,Q9D6J6,Q9CQQ7,Q9CPQ8,P63030,Q9CQJ8,Q9CPP6,Q91YT0,Q99LY9,Q8K3J1,Q91WD5,P58281,Q9DCT2,P41216,Q9DC69,P56135,Q99J39,Q7TMF3,Q8BK30
98	nucleotide metabolic process	GO:BP	0.00521306	Q9DCJ5,Q9D6J6,Q9CQQ7,Q9CPQ8,P63030,Q9CQJ8,Q9CPP6,Q91YT0,Q99LY9,Q8K3J1,Q91WD5,P58281,Q9DCT2,P41216,Q9DC69,P56135,Q99J39,Q7TMF3,Q8BK30
98	energy derivation by oxidation of organic compounds	GO:BP	0.00555845	Q9DCJ5,Q9D6J6,Q8R1I1,P99028,Q9CQQ7,Q9CQJ8,Q9CPP6,Q91YT0,Q99LY9,Q8K3J1,Q91WD5,Q9DCT2,Q9DC69,Q8K1R3,Q8K1Z0,P56135,Q7TMF3,Q8BK30
98	nucleobase-containing small molecule metabolic process	GO:BP	0.00676845	Q9DCJ5,Q9D6J6,Q9CQQ7,Q9CPQ8,P63030,Q9CQJ8,Q9CPP6,Q91YT0,Q99LY9,Q8K3J1,Q91WD5,P58281,Q9DCT2,P41216,Q9DC69,P56135,Q99J39,Q7TMF3,Q8BK30
98	organic cyclic compound biosynthetic process	GO:BP	0.00702152	Q9DCJ5,Q9D6J6,Q9CQQ7,Q9CPQ8,P63030,Q9CQJ8,Q9CPP6,Q91YT0,Q99LY9,Q8K3J1,Q91WD5,Q9DCT2,P67778,P41216,Q9DC69,P56135,Q99J39,Q7TMF3,Q8BK30,O35129
98	mitochondrial ATP synthesis coupled electron transport	GO:BP	0.0309632	Q9D6J6,Q8R1I1,P99028,Q91YT0,Q8K3J1,Q91WD5,Q9DCT2,Q8K1Z0,Q7TMF3,Q8BK30
98	small molecule metabolic process	GO:BP	0.0312586	Q9DCJ5,Q9D6J6,Q9CQQ7,Q9CPQ8,Q91V61,P63030,P50544,Q9CQJ8,Q91VM9,Q9CPP6,Q91YT0,Q64521,Q99LY9,Q8K3J1,Q91WD5,P58281,Q9DCT2,P41216,Q9DC69,Q91WK5,Q8K1Z0,P56135,Q99J39,Q7TMF3,Q8BK30,Q8BH86,D3Z7P3
98	ATP synthesis coupled electron transport	GO:BP	0.0361649	Q9D6J6,Q8R1I1,P99028,Q91YT0,Q8K3J1,Q91WD5,Q9DCT2,Q8K1Z0,Q7TMF3,Q8BK30
98	respiratory electron transport chain	GO:BP	0.0364209	Q9D6J6,Q8R1I1,P99028,Q9CPP6,Q91YT0,Q8K3J1,Q91WD5,Q9DCT2,Q8K1Z0,Q7TMF3,Q8BK30
103	NADH dehydrogenase complex assembly	GO:BP	3.38594e-10	Q9CR61,Q9CQZ6,Q9CQ91,Q9CPU2,Q9D6J5,Q9CQ54,Q3UIU2,Q9CQH3,Q99LC3,O09111,P52503
103	mitochondrial respiratory chain complex I assembly	GO:BP	3.38594e-10	Q9CR61,Q9CQZ6,Q9CQ91,Q9CPU2,Q9D6J5,Q9CQ54,Q3UIU2,Q9CQH3,Q99LC3,O09111,P52503
103	proton motive force-driven mitochondrial ATP synthesis	GO:BP	2.27077e-09	Q9CR61,Q9CQZ6,Q9CQ91,Q9CPU2,Q9D6J5,Q9CQ54,Q3UIU2,Q9CQH3,Q99LC3,O09111,P52503
103	proton motive force-driven ATP synthesis	GO:BP	4.79319e-09	Q9CR61,Q9CQZ6,Q9CQ91,Q9CPU2,Q9D6J5,Q9CQ54,Q3UIU2,Q9CQH3,Q99LC3,O09111,P52503
103	ribonucleoside triphosphate biosynthetic process	GO:BP	2.94943e-08	Q9CR61,Q9CQZ6,Q9CQ91,Q9CPU2,Q9D6J5,Q9CQ54,Q3UIU2,Q9CQH3,Q99LC3,O09111,P52503
103	purine ribonucleoside triphosphate biosynthetic process	GO:BP	2.94943e-08	Q9CR61,Q9CQZ6,Q9CQ91,Q9CPU2,Q9D6J5,Q9CQ54,Q3UIU2,Q9CQH3,Q99LC3,O09111,P52503
103	ATP biosynthetic process	GO:BP	2.94943e-08	Q9CR61,Q9CQZ6,Q9CQ91,Q9CPU2,Q9D6J5,Q9CQ54,Q3UIU2,Q9CQH3,Q99LC3,O09111,P52503
103	purine nucleoside triphosphate biosynthetic process	GO:BP	2.94943e-08	Q9CR61,Q9CQZ6,Q9CQ91,Q9CPU2,Q9D6J5,Q9CQ54,Q3UIU2,Q9CQH3,Q99LC3,O09111,P52503
103	nucleoside triphosphate biosynthetic process	GO:BP	3.42874e-08	Q9CR61,Q9CQZ6,Q9CQ91,Q9CPU2,Q9D6J5,Q9CQ54,Q3UIU2,Q9CQH3,Q99LC3,O09111,P52503
103	mitochondrial respiratory chain complex assembly	GO:BP	1.38646e-07	Q9CR61,Q9CQZ6,Q9CQ91,Q9CPU2,Q9D6J5,Q9CQ54,Q3UIU2,Q9CQH3,Q99LC3,O09111,P52503
103	ATP metabolic process	GO:BP	1.57882e-07	Q9CR61,Q9CQZ6,Q9CQ91,Q9CPU2,Q9D6J5,Q9CQ54,Q3UIU2,Q9CQH3,Q99LC3,O09111,P52503
103	ribonucleoside triphosphate metabolic process	GO:BP	2.03755e-07	Q9CR61,Q9CQZ6,Q9CQ91,Q9CPU2,Q9D6J5,Q9CQ54,Q3UIU2,Q9CQH3,Q99LC3,O09111,P52503
103	purine nucleoside triphosphate metabolic process	GO:BP	2.03755e-07	Q9CR61,Q9CQZ6,Q9CQ91,Q9CPU2,Q9D6J5,Q9CQ54,Q3UIU2,Q9CQH3,Q99LC3,O09111,P52503
103	purine ribonucleoside triphosphate metabolic process	GO:BP	2.03755e-07	Q9CR61,Q9CQZ6,Q9CQ91,Q9CPU2,Q9D6J5,Q9CQ54,Q3UIU2,Q9CQH3,Q99LC3,O09111,P52503
103	nucleoside triphosphate metabolic process	GO:BP	2.6135e-07	Q9CR61,Q9CQZ6,Q9CQ91,Q9CPU2,Q9D6J5,Q9CQ54,Q3UIU2,Q9CQH3,Q99LC3,O09111,P52503
103	purine nucleotide biosynthetic process	GO:BP	9.31734e-07	Q9CR61,Q9CQZ6,Q9CQ91,Q9CPU2,Q9D6J5,Q9CQ54,Q3UIU2,Q9CQH3,Q99LC3,O09111,P52503
103	purine ribonucleotide biosynthetic process	GO:BP	9.31734e-07	Q9CR61,Q9CQZ6,Q9CQ91,Q9CPU2,Q9D6J5,Q9CQ54,Q3UIU2,Q9CQH3,Q99LC3,O09111,P52503
103	purine-containing compound biosynthetic process	GO:BP	1.03814e-06	Q9CR61,Q9CQZ6,Q9CQ91,Q9CPU2,Q9D6J5,Q9CQ54,Q3UIU2,Q9CQH3,Q99LC3,O09111,P52503
103	ribose phosphate biosynthetic process	GO:BP	1.15538e-06	Q9CR61,Q9CQZ6,Q9CQ91,Q9CPU2,Q9D6J5,Q9CQ54,Q3UIU2,Q9CQH3,Q99LC3,O09111,P52503
103	ribonucleotide biosynthetic process	GO:BP	1.15538e-06	Q9CR61,Q9CQZ6,Q9CQ91,Q9CPU2,Q9D6J5,Q9CQ54,Q3UIU2,Q9CQH3,Q99LC3,O09111,P52503
103	carbohydrate derivative biosynthetic process	GO:BP	2.37184e-06	Q9CR61,Q9CQZ6,Q9CQ91,Q9CPU2,Q9D6J5,Q9CQ54,Q3UIU2,Q9CQH3,Q99LC3,O09111,P52503
103	nucleoside phosphate biosynthetic process	GO:BP	2.61796e-06	Q9CR61,Q9CQZ6,Q9CQ91,Q9CPU2,Q9D6J5,Q9CQ54,Q3UIU2,Q9CQH3,Q99LC3,O09111,P52503
103	nucleotide biosynthetic process	GO:BP	2.61796e-06	Q9CR61,Q9CQZ6,Q9CQ91,Q9CPU2,Q9D6J5,Q9CQ54,Q3UIU2,Q9CQH3,Q99LC3,O09111,P52503
103	oxidative phosphorylation	GO:BP	2.88688e-06	Q9CR61,Q9CQZ6,Q9CQ91,Q9CPU2,Q9D6J5,Q9CQ54,Q3UIU2,Q9CQH3,Q99LC3,O09111,P52503
103	nucleobase-containing compound biosynthetic process	GO:BP	9.48442e-06	Q8R3J4,Q9CR61,Q9CQZ6,Q9CQ91,Q9CPU2,Q9D6J5,Q9CQ54,Q3UIU2,Q9CQH3,Q99LC3,O09111,P52503
103	organophosphate biosynthetic process	GO:BP	1.85664e-05	Q9CR61,Q9CQZ6,Q9CQ91,Q9CPU2,Q9D6J5,Q9CQ54,Q3UIU2,Q9CQH3,Q99LC3,O09111,P52503
103	aerobic respiration	GO:BP	2.55294e-05	Q9CR61,Q9CQZ6,Q9CQ91,Q9CPU2,Q9D6J5,Q9CQ54,Q3UIU2,Q9CQH3,Q99LC3,O09111,P52503
103	aromatic compound biosynthetic process	GO:BP	3.66088e-05	Q8R3J4,Q9CR61,Q9CQZ6,Q9CQ91,Q9CPU2,Q9D6J5,Q9CQ54,Q3UIU2,Q9CQH3,Q99LC3,O09111,P52503
103	heterocycle biosynthetic process	GO:BP	4.70604e-05	Q8R3J4,Q9CR61,Q9CQZ6,Q9CQ91,Q9CPU2,Q9D6J5,Q9CQ54,Q3UIU2,Q9CQH3,Q99LC3,O09111,P52503
103	cellular component assembly	GO:BP	5.32423e-05	Q8R3J4,Q9CR61,Q9CQZ6,Q9CQ91,Q9CPU2,Q9D6J5,Q9CQ54,Q3UIU2,Q9CQH3,Q99LC3,O09111,P52503
103	purine ribonucleotide metabolic process	GO:BP	7.22605e-05	Q9CR61,Q9CQZ6,Q9CQ91,Q9CPU2,Q9D6J5,Q9CQ54,Q3UIU2,Q9CQH3,Q99LC3,O09111,P52503
103	purine nucleotide metabolic process	GO:BP	7.75218e-05	Q9CR61,Q9CQZ6,Q9CQ91,Q9CPU2,Q9D6J5,Q9CQ54,Q3UIU2,Q9CQH3,Q99LC3,O09111,P52503
103	ribonucleotide metabolic process	GO:BP	8.31246e-05	Q9CR61,Q9CQZ6,Q9CQ91,Q9CPU2,Q9D6J5,Q9CQ54,Q3UIU2,Q9CQH3,Q99LC3,O09111,P52503
103	purine-containing compound metabolic process	GO:BP	8.90884e-05	Q9CR61,Q9CQZ6,Q9CQ91,Q9CPU2,Q9D6J5,Q9CQ54,Q3UIU2,Q9CQH3,Q99LC3,O09111,P52503
103	ribose phosphate metabolic process	GO:BP	8.90884e-05	Q9CR61,Q9CQZ6,Q9CQ91,Q9CPU2,Q9D6J5,Q9CQ54,Q3UIU2,Q9CQH3,Q99LC3,O09111,P52503
103	organic cyclic compound biosynthetic process	GO:BP	0.000102465	Q8R3J4,Q9CR61,Q9CQZ6,Q9CQ91,Q9CPU2,Q9D6J5,Q9CQ54,Q3UIU2,Q9CQH3,Q99LC3,O09111,P52503
103	cellular component biogenesis	GO:BP	0.000121675	Q8R3J4,Q9CR61,Q9CQZ6,Q9CQ91,Q9CPU2,Q9D6J5,Q9CQ54,Q3UIU2,Q9CQH3,Q99LC3,O09111,P52503
103	protein-containing complex assembly	GO:BP	0.000125073	Q9CR61,Q9CQZ6,Q9CQ91,Q9CPU2,Q9D6J5,Q9CQ54,Q3UIU2,Q9CQH3,Q99LC3,O09111,P52503
103	cellular respiration	GO:BP	0.000142789	Q9CR61,Q9CQZ6,Q9CQ91,Q9CPU2,Q9D6J5,Q9CQ54,Q3UIU2,Q9CQH3,Q99LC3,O09111,P52503
103	energy derivation by oxidation of organic compounds	GO:BP	0.000152465	Q9CR61,Q9CQZ6,Q9CQ91,Q9CPU2,Q9D6J5,Q9CQ54,Q3UIU2,Q9CQH3,Q99LC3,O09111,P52503
103	protein-containing complex organization	GO:BP	0.0001736	Q9CR61,Q9CQZ6,Q9CQ91,Q9CPU2,Q9D6J5,Q9CQ54,Q3UIU2,Q9CQH3,Q99LC3,O09111,P52503
103	carbohydrate derivative metabolic process	GO:BP	0.000286947	Q9CR61,Q9CQZ6,Q9CQ91,Q9CPU2,Q9D6J5,Q9CQ54,Q3UIU2,Q9CQH3,Q99LC3,O09111,P52503
103	nucleotide metabolic process	GO:BP	0.00043637	Q9CR61,Q9CQZ6,Q9CQ91,Q9CPU2,Q9D6J5,Q9CQ54,Q3UIU2,Q9CQH3,Q99LC3,O09111,P52503
103	nucleoside phosphate metabolic process	GO:BP	0.00043637	Q9CR61,Q9CQZ6,Q9CQ91,Q9CPU2,Q9D6J5,Q9CQ54,Q3UIU2,Q9CQH3,Q99LC3,O09111,P52503
103	nucleobase-containing small molecule metabolic process	GO:BP	0.000519399	Q9CR61,Q9CQZ6,Q9CQ91,Q9CPU2,Q9D6J5,Q9CQ54,Q3UIU2,Q9CQH3,Q99LC3,O09111,P52503
103	generation of precursor metabolites and energy	GO:BP	0.000616296	Q9CR61,Q9CQZ6,Q9CQ91,Q9CPU2,Q9D6J5,Q9CQ54,Q3UIU2,Q9CQH3,Q99LC3,O09111,P52503
103	organelle organization	GO:BP	0.00102255	Q8R3J4,Q9CR61,Q9CQZ6,Q9CQ91,Q9CPU2,Q9D6J5,Q9D173,Q9CQ54,Q3UIU2,Q9CQH3,Q99LC3,O09111,P52503
103	organophosphate metabolic process	GO:BP	0.00208238	Q9CR61,Q9CQZ6,Q9CQ91,Q9CPU2,Q9D6J5,Q9CQ54,Q3UIU2,Q9CQH3,Q99LC3,O09111,P52503
103	mitochondrion organization	GO:BP	0.00243504	Q9CR61,Q9CQZ6,Q9CQ91,Q9CPU2,Q9D6J5,Q9D173,Q9CQ54,Q3UIU2,Q9CQH3,Q99LC3,O09111,P52503
103	cellular component organization	GO:BP	0.00790744	Q8R3J4,Q9CR61,Q9CQZ6,Q9CQ91,Q9CPU2,Q9D6J5,Q9D173,Q9CQ54,Q3UIU2,Q9CQH3,Q99LC3,O09111,P52503
103	phosphorus metabolic process	GO:BP	0.00900795	Q9CR61,Q9CQZ6,Q9CQ91,Q9CPU2,Q9D6J5,Q9CQ54,Q3UIU2,Q9CQH3,Q99LC3,O09111,P52503
103	phosphate-containing compound metabolic process	GO:BP	0.00900795	Q9CR61,Q9CQZ6,Q9CQ91,Q9CPU2,Q9D6J5,Q9CQ54,Q3UIU2,Q9CQH3,Q99LC3,O09111,P52503
103	cellular component organization or biogenesis	GO:BP	0.0121933	Q8R3J4,Q9CR61,Q9CQZ6,Q9CQ91,Q9CPU2,Q9D6J5,Q9D173,Q9CQ54,Q3UIU2,Q9CQH3,Q99LC3,O09111,P52503
103	nucleobase-containing compound metabolic process	GO:BP	0.0245749	Q8R3J4,Q9CR61,Q9CQZ6,Q9CQ91,Q9CPU2,Q9D6J5,Q9CQ54,Q3UIU2,Q9CQH3,Q99LC3,O09111,P52503
103	cellular nitrogen compound biosynthetic process	GO:BP	0.0290486	Q8R3J4,Q9CR61,Q9CQZ6,Q9CQ91,Q9CPU2,Q9D6J5,Q9CQ54,Q3UIU2,Q9CQH3,Q99LC3,O09111,P52503
104	energy coupled proton transmembrane transport, against electrochemical gradient	GO:BP	0.01211	Q9DC70,P00158
104	electron transport coupled proton transport	GO:BP	0.01211	Q9DC70,P00158
107	protein complex oligomerization	GO:BP	0.0210135	Q9CQR4,Q8R4N0,Q91VT4,P50171,P09671,Q8CIW5
107	glutathione metabolic process	GO:BP	0.0301292	Q9DCM2,Q9DCM0,Q9WVL0,P09671
108	telomere maintenance	GO:BP	0.0231812	P28352,Q80SX8
108	telomere organization	GO:BP	0.0231812	P28352,Q80SX8
115	response to xenobiotic stimulus	GO:BP	0.0166942	Q921H8,Q8BMS1,Q8VCH0,P47199,Q64520,Q61425,P09671
118	NADH dehydrogenase complex assembly	GO:BP	6.5237e-05	Q9CQZ6,Q9CQ91,Q9CPU2,Q9D6J5,Q9CQ54,Q9CQH3,Q91WD5,Q99LC3
118	mitochondrial respiratory chain complex I assembly	GO:BP	6.5237e-05	Q9CQZ6,Q9CQ91,Q9CPU2,Q9D6J5,Q9CQ54,Q9CQH3,Q91WD5,Q99LC3
118	proton motive force-driven mitochondrial ATP synthesis	GO:BP	0.000240159	Q9CQZ6,Q9CQ91,Q9CPU2,Q9D6J5,Q9CQ54,Q9CQH3,Q91WD5,Q99LC3
118	mitochondrial respiratory chain complex assembly	GO:BP	0.000274249	Q9CQZ6,Q9CQ91,Q9CPU2,Q9D6J5,Q9CQ54,Q9CQH3,Q91WD5,Q9D2R6,Q99LC3
118	proton motive force-driven ATP synthesis	GO:BP	0.00040055	Q9CQZ6,Q9CQ91,Q9CPU2,Q9D6J5,Q9CQ54,Q9CQH3,Q91WD5,Q99LC3
118	purine ribonucleoside triphosphate biosynthetic process	GO:BP	0.0013876	Q9CQZ6,Q9CQ91,Q9CPU2,Q9D6J5,Q9CQ54,Q9CQH3,Q91WD5,Q99LC3
118	ribonucleoside triphosphate biosynthetic process	GO:BP	0.0013876	Q9CQZ6,Q9CQ91,Q9CPU2,Q9D6J5,Q9CQ54,Q9CQH3,Q91WD5,Q99LC3
118	purine nucleoside triphosphate biosynthetic process	GO:BP	0.0013876	Q9CQZ6,Q9CQ91,Q9CPU2,Q9D6J5,Q9CQ54,Q9CQH3,Q91WD5,Q99LC3
118	ATP biosynthetic process	GO:BP	0.0013876	Q9CQZ6,Q9CQ91,Q9CPU2,Q9D6J5,Q9CQ54,Q9CQH3,Q91WD5,Q99LC3
118	nucleoside triphosphate biosynthetic process	GO:BP	0.00153785	Q9CQZ6,Q9CQ91,Q9CPU2,Q9D6J5,Q9CQ54,Q9CQH3,Q91WD5,Q99LC3
118	ATP metabolic process	GO:BP	0.00435317	Q9CQZ6,Q9CQ91,Q9CPU2,Q9D6J5,Q9CQ54,Q9CQH3,Q91WD5,Q99LC3
118	purine nucleoside triphosphate metabolic process	GO:BP	0.0051772	Q9CQZ6,Q9CQ91,Q9CPU2,Q9D6J5,Q9CQ54,Q9CQH3,Q91WD5,Q99LC3
118	ribonucleoside triphosphate metabolic process	GO:BP	0.0051772	Q9CQZ6,Q9CQ91,Q9CPU2,Q9D6J5,Q9CQ54,Q9CQH3,Q91WD5,Q99LC3
118	purine ribonucleoside triphosphate metabolic process	GO:BP	0.0051772	Q9CQZ6,Q9CQ91,Q9CPU2,Q9D6J5,Q9CQ54,Q9CQH3,Q91WD5,Q99LC3
118	protein-containing complex assembly	GO:BP	0.00592124	Q8JZQ2,Q9CQZ6,Q9CQ91,Q9CPU2,Q9D6J5,Q9CQ54,Q9CQH3,Q91WD5,Q9D2R6,Q99LC3
118	nucleoside triphosphate metabolic process	GO:BP	0.00613075	Q9CQZ6,Q9CQ91,Q9CPU2,Q9D6J5,Q9CQ54,Q9CQH3,Q91WD5,Q99LC3
118	protein-containing complex organization	GO:BP	0.00788158	Q8JZQ2,Q9CQZ6,Q9CQ91,Q9CPU2,Q9D6J5,Q9CQ54,Q9CQH3,Q91WD5,Q9D2R6,Q99LC3
118	purine nucleotide biosynthetic process	GO:BP	0.0144989	Q9CQZ6,Q9CQ91,Q9CPU2,Q9D6J5,Q9CQ54,Q9CQH3,Q91WD5,Q99LC3
118	purine ribonucleotide biosynthetic process	GO:BP	0.0144989	Q9CQZ6,Q9CQ91,Q9CPU2,Q9D6J5,Q9CQ54,Q9CQH3,Q91WD5,Q99LC3
118	purine-containing compound biosynthetic process	GO:BP	0.015597	Q9CQZ6,Q9CQ91,Q9CPU2,Q9D6J5,Q9CQ54,Q9CQH3,Q91WD5,Q99LC3
118	ribose phosphate biosynthetic process	GO:BP	0.0167648	Q9CQZ6,Q9CQ91,Q9CPU2,Q9D6J5,Q9CQ54,Q9CQH3,Q91WD5,Q99LC3
118	ribonucleotide biosynthetic process	GO:BP	0.0167648	Q9CQZ6,Q9CQ91,Q9CPU2,Q9D6J5,Q9CQ54,Q9CQH3,Q91WD5,Q99LC3
118	generation of precursor metabolites and energy	GO:BP	0.0237063	Q921G7,Q9CQZ6,Q9CQ91,Q9CPU2,Q9D6J5,Q9CQ54,Q9CQH3,Q91WD5,Q99LC3,Q9DB41
118	carbohydrate derivative biosynthetic process	GO:BP	0.0272108	Q9CQZ6,Q9CQ91,Q9CPU2,Q9D6J5,Q9CQ54,Q9CQH3,Q91WD5,Q99LC3
118	nucleotide biosynthetic process	GO:BP	0.0290773	Q9CQZ6,Q9CQ91,Q9CPU2,Q9D6J5,Q9CQ54,Q9CQH3,Q91WD5,Q99LC3
118	nucleoside phosphate biosynthetic process	GO:BP	0.0290773	Q9CQZ6,Q9CQ91,Q9CPU2,Q9D6J5,Q9CQ54,Q9CQH3,Q91WD5,Q99LC3
118	cellular component assembly	GO:BP	0.0301686	Q8JZQ2,Q9CQZ6,Q9CQ91,Q9CPU2,Q9D6J5,Q9CQ54,Q9CQH3,Q91WD5,Q9D2R6,Q99LC3
118	oxidative phosphorylation	GO:BP	0.0310508	Q9CQZ6,Q9CQ91,Q9CPU2,Q9D6J5,Q9CQ54,Q9CQH3,Q91WD5,Q99LC3
125	proton motive force-driven mitochondrial ATP synthesis	GO:BP	0.00037532	Q99LY9,Q9D6J5,Q9CQ54,Q8K3J1,Q9CQH3,Q91WD5,Q99LC3,P56135,Q8BK30
125	proton motive force-driven ATP synthesis	GO:BP	0.000661441	Q99LY9,Q9D6J5,Q9CQ54,Q8K3J1,Q9CQH3,Q91WD5,Q99LC3,P56135,Q8BK30
125	purine ribonucleoside triphosphate biosynthetic process	GO:BP	0.0026034	Q99LY9,Q9D6J5,Q9CQ54,Q8K3J1,Q9CQH3,Q91WD5,Q99LC3,P56135,Q8BK30
125	ribonucleoside triphosphate biosynthetic process	GO:BP	0.0026034	Q99LY9,Q9D6J5,Q9CQ54,Q8K3J1,Q9CQH3,Q91WD5,Q99LC3,P56135,Q8BK30
125	purine nucleoside triphosphate biosynthetic process	GO:BP	0.0026034	Q99LY9,Q9D6J5,Q9CQ54,Q8K3J1,Q9CQH3,Q91WD5,Q99LC3,P56135,Q8BK30
125	ATP biosynthetic process	GO:BP	0.0026034	Q99LY9,Q9D6J5,Q9CQ54,Q8K3J1,Q9CQH3,Q91WD5,Q99LC3,P56135,Q8BK30
125	nucleoside triphosphate biosynthetic process	GO:BP	0.00291471	Q99LY9,Q9D6J5,Q9CQ54,Q8K3J1,Q9CQH3,Q91WD5,Q99LC3,P56135,Q8BK30
125	generation of precursor metabolites and energy	GO:BP	0.00395394	Q8BH59,Q921G7,Q99LY9,Q9D6J5,Q9CQ54,Q8K3J1,Q9CQH3,Q91WD5,Q61387,Q99LC3,Q9DB41,P56135,Q8BK30
125	cellular respiration	GO:BP	0.0062798	Q8BH59,Q99LY9,Q9D6J5,Q9CQ54,Q8K3J1,Q9CQH3,Q91WD5,Q61387,Q99LC3,Q9DB41,P56135,Q8BK30
125	energy derivation by oxidation of organic compounds	GO:BP	0.00671015	Q8BH59,Q99LY9,Q9D6J5,Q9CQ54,Q8K3J1,Q9CQH3,Q91WD5,Q61387,Q99LC3,Q9DB41,P56135,Q8BK30
125	ATP metabolic process	GO:BP	0.00910663	Q99LY9,Q9D6J5,Q9CQ54,Q8K3J1,Q9CQH3,Q91WD5,Q99LC3,P56135,Q8BK30
125	oxidative phosphorylation	GO:BP	0.0104688	Q99LY9,Q9D6J5,Q9CQ54,Q8K3J1,Q9CQH3,Q91WD5,Q61387,Q99LC3,P56135,Q8BK30
125	purine nucleoside triphosphate metabolic process	GO:BP	0.0110019	Q99LY9,Q9D6J5,Q9CQ54,Q8K3J1,Q9CQH3,Q91WD5,Q99LC3,P56135,Q8BK30
125	ribonucleoside triphosphate metabolic process	GO:BP	0.0110019	Q99LY9,Q9D6J5,Q9CQ54,Q8K3J1,Q9CQH3,Q91WD5,Q99LC3,P56135,Q8BK30
125	purine ribonucleoside triphosphate metabolic process	GO:BP	0.0110019	Q99LY9,Q9D6J5,Q9CQ54,Q8K3J1,Q9CQH3,Q91WD5,Q99LC3,P56135,Q8BK30
125	nucleoside triphosphate metabolic process	GO:BP	0.0132265	Q99LY9,Q9D6J5,Q9CQ54,Q8K3J1,Q9CQH3,Q91WD5,Q99LC3,P56135,Q8BK30
125	NADH dehydrogenase complex assembly	GO:BP	0.0167305	Q99LY9,Q9D6J5,Q9CQ54,Q8K3J1,Q9CQH3,Q91WD5,Q99LC3
125	mitochondrial respiratory chain complex I assembly	GO:BP	0.0167305	Q99LY9,Q9D6J5,Q9CQ54,Q8K3J1,Q9CQH3,Q91WD5,Q99LC3
125	purine nucleotide biosynthetic process	GO:BP	0.0336604	Q99LY9,Q9D6J5,Q9CQ54,Q8K3J1,Q9CQH3,Q91WD5,Q99LC3,P56135,Q8BK30
125	purine ribonucleotide biosynthetic process	GO:BP	0.0336604	Q99LY9,Q9D6J5,Q9CQ54,Q8K3J1,Q9CQH3,Q91WD5,Q99LC3,P56135,Q8BK30
125	purine-containing compound biosynthetic process	GO:BP	0.0364252	Q99LY9,Q9D6J5,Q9CQ54,Q8K3J1,Q9CQH3,Q91WD5,Q99LC3,P56135,Q8BK30
125	ribose phosphate biosynthetic process	GO:BP	0.0393812	Q99LY9,Q9D6J5,Q9CQ54,Q8K3J1,Q9CQH3,Q91WD5,Q99LC3,P56135,Q8BK30
125	ribonucleotide biosynthetic process	GO:BP	0.0393812	Q99LY9,Q9D6J5,Q9CQ54,Q8K3J1,Q9CQH3,Q91WD5,Q99LC3,P56135,Q8BK30
136	proton motive force-driven mitochondrial ATP synthesis	GO:BP	0.00313573	Q9CQ91,Q9CPU2,Q9D6J5,Q9CQ54,Q8K3J1,Q9CQH3,Q91WD5,Q99LC3,Q8BK30
136	proton motive force-driven ATP synthesis	GO:BP	0.00545051	Q9CQ91,Q9CPU2,Q9D6J5,Q9CQ54,Q8K3J1,Q9CQH3,Q91WD5,Q99LC3,Q8BK30
136	mitochondrial respiratory chain complex I assembly	GO:BP	0.00900937	Q9CQ91,Q9CPU2,Q9D6J5,Q9CQ54,Q8K3J1,Q9CQH3,Q91WD5,Q99LC3
136	NADH dehydrogenase complex assembly	GO:BP	0.00900937	Q9CQ91,Q9CPU2,Q9D6J5,Q9CQ54,Q8K3J1,Q9CQH3,Q91WD5,Q99LC3
136	generation of precursor metabolites and energy	GO:BP	0.0120288	Q9CQ91,Q9CPU2,Q9D6J5,Q9CQ54,Q8K3J1,Q9CQH3,Q91WD5,Q61387,Q99LC3,Q9DB41,P97478,Q9D6M3,Q8BK30,O35129
136	oxidative phosphorylation	GO:BP	0.0144355	Q9CQ91,Q9CPU2,Q9D6J5,Q9CQ54,Q8K3J1,Q9CQH3,Q91WD5,Q61387,Q99LC3,P97478,Q8BK30
136	cellular respiration	GO:BP	0.01474	Q9CQ91,Q9CPU2,Q9D6J5,Q9CQ54,Q8K3J1,Q9CQH3,Q91WD5,Q61387,Q99LC3,Q9DB41,P97478,Q9D6M3,Q8BK30
136	energy derivation by oxidation of organic compounds	GO:BP	0.015807	Q9CQ91,Q9CPU2,Q9D6J5,Q9CQ54,Q8K3J1,Q9CQH3,Q91WD5,Q61387,Q99LC3,Q9DB41,P97478,Q9D6M3,Q8BK30
136	nucleobase-containing compound biosynthetic process	GO:BP	0.0181495	Q8R3J4,P63030,Q9CQ91,Q9CPU2,Q9D6J5,Q9CQ54,Q8K3J1,Q9CQH3,Q91WD5,Q99LC3,P97478,Q8BK30,O35129
136	purine nucleoside triphosphate biosynthetic process	GO:BP	0.0206512	Q9CQ91,Q9CPU2,Q9D6J5,Q9CQ54,Q8K3J1,Q9CQH3,Q91WD5,Q99LC3,Q8BK30
136	ribonucleoside triphosphate biosynthetic process	GO:BP	0.0206512	Q9CQ91,Q9CPU2,Q9D6J5,Q9CQ54,Q8K3J1,Q9CQH3,Q91WD5,Q99LC3,Q8BK30
136	purine ribonucleoside triphosphate biosynthetic process	GO:BP	0.0206512	Q9CQ91,Q9CPU2,Q9D6J5,Q9CQ54,Q8K3J1,Q9CQH3,Q91WD5,Q99LC3,Q8BK30
136	ATP biosynthetic process	GO:BP	0.0206512	Q9CQ91,Q9CPU2,Q9D6J5,Q9CQ54,Q8K3J1,Q9CQH3,Q91WD5,Q99LC3,Q8BK30
136	nucleoside triphosphate biosynthetic process	GO:BP	0.0230404	Q9CQ91,Q9CPU2,Q9D6J5,Q9CQ54,Q8K3J1,Q9CQH3,Q91WD5,Q99LC3,Q8BK30
136	purine ribonucleotide biosynthetic process	GO:BP	0.0385663	P63030,Q9CQ91,Q9CPU2,Q9D6J5,Q9CQ54,Q8K3J1,Q9CQH3,Q91WD5,Q99LC3,Q8BK30
136	purine nucleotide biosynthetic process	GO:BP	0.0385663	P63030,Q9CQ91,Q9CPU2,Q9D6J5,Q9CQ54,Q8K3J1,Q9CQH3,Q91WD5,Q99LC3,Q8BK30
136	purine-containing compound biosynthetic process	GO:BP	0.0420584	P63030,Q9CQ91,Q9CPU2,Q9D6J5,Q9CQ54,Q8K3J1,Q9CQH3,Q91WD5,Q99LC3,Q8BK30
136	ribonucleotide biosynthetic process	GO:BP	0.0458199	P63030,Q9CQ91,Q9CPU2,Q9D6J5,Q9CQ54,Q8K3J1,Q9CQH3,Q91WD5,Q99LC3,Q8BK30
136	ribose phosphate biosynthetic process	GO:BP	0.0458199	P63030,Q9CQ91,Q9CPU2,Q9D6J5,Q9CQ54,Q8K3J1,Q9CQH3,Q91WD5,Q99LC3,Q8BK30
138	mitochondrion organization	GO:BP	0.0157539	Q8JZQ2,Q9D6J5,Q9D173,Q9CQ54,Q8K3J1,Q9CQH3,Q91WD5,Q9CQ85,Q64373,Q9D2R6,Q99LC3,Q60930
138	ATP biosynthetic process	GO:BP	0.0260127	Q9D6J5,Q9CQ54,Q8K3J1,Q9CQH3,Q91WD5,Q64373,Q99LC3
138	ribonucleoside triphosphate biosynthetic process	GO:BP	0.0260127	Q9D6J5,Q9CQ54,Q8K3J1,Q9CQH3,Q91WD5,Q64373,Q99LC3
138	purine nucleoside triphosphate biosynthetic process	GO:BP	0.0260127	Q9D6J5,Q9CQ54,Q8K3J1,Q9CQH3,Q91WD5,Q64373,Q99LC3
138	purine ribonucleoside triphosphate biosynthetic process	GO:BP	0.0260127	Q9D6J5,Q9CQ54,Q8K3J1,Q9CQH3,Q91WD5,Q64373,Q99LC3
138	nucleoside triphosphate biosynthetic process	GO:BP	0.0283971	Q9D6J5,Q9CQ54,Q8K3J1,Q9CQH3,Q91WD5,Q64373,Q99LC3
138	NADH dehydrogenase complex assembly	GO:BP	0.0305589	Q9D6J5,Q9CQ54,Q8K3J1,Q9CQH3,Q91WD5,Q99LC3
138	mitochondrial respiratory chain complex I assembly	GO:BP	0.0305589	Q9D6J5,Q9CQ54,Q8K3J1,Q9CQH3,Q91WD5,Q99LC3
141	acetyl-CoA biosynthetic process	GO:BP	0.00299976	Q91V92,Q9D051,O08749,P35486
141	thioester biosynthetic process	GO:BP	0.00782218	Q91V92,Q9D051,O08749,P35486
141	acyl-CoA biosynthetic process	GO:BP	0.00782218	Q91V92,Q9D051,O08749,P35486
141	sulfur compound biosynthetic process	GO:BP	0.0096128	Q91V92,Q9D051,O08749,P35486
141	mitochondrial acetyl-CoA biosynthetic process from pyruvate	GO:BP	0.0130742	Q9D051,O08749,P35486
141	nucleoside bisphosphate biosynthetic process	GO:BP	0.0140758	Q91V92,Q9D051,O08749,P35486
141	ribonucleoside bisphosphate biosynthetic process	GO:BP	0.0140758	Q91V92,Q9D051,O08749,P35486
141	purine nucleoside bisphosphate biosynthetic process	GO:BP	0.0140758	Q91V92,Q9D051,O08749,P35486
141	acetyl-CoA metabolic process	GO:BP	0.0199008	Q91V92,Q9D051,O08749,P35486
141	thioester metabolic process	GO:BP	0.0309146	Q91V92,Q9D051,Q60597,O08749,P35486
141	acyl-CoA metabolic process	GO:BP	0.0309146	Q91V92,Q9D051,Q60597,O08749,P35486
141	nucleoside bisphosphate metabolic process	GO:BP	0.043654	Q91V92,Q9D051,Q60597,O08749,P35486
141	ribonucleoside bisphosphate metabolic process	GO:BP	0.043654	Q91V92,Q9D051,Q60597,O08749,P35486
141	purine nucleoside bisphosphate metabolic process	GO:BP	0.043654	Q91V92,Q9D051,Q60597,O08749,P35486
143	aerobic electron transport chain	GO:BP	0.00828458	Q9DB77,Q9D6J6,Q9CZ13
143	mitochondrial ATP synthesis coupled electron transport	GO:BP	0.013741	Q9DB77,Q9D6J6,Q9CZ13
143	ATP synthesis coupled electron transport	GO:BP	0.0144642	Q9DB77,Q9D6J6,Q9CZ13
143	respiratory electron transport chain	GO:BP	0.0262892	Q9DB77,Q9D6J6,Q9CZ13
143	electron transport chain	GO:BP	0.0309193	Q9DB77,Q9D6J6,Q9CZ13
143	mitochondrial electron transport, ubiquinol to cytochrome c	GO:BP	0.0358925	Q9DB77,Q9CZ13
150	fatty acid catabolic process	GO:BP	0.000453019	Q9DCW4,Q99LC5,Q8BH04,P51660
150	monocarboxylic acid catabolic process	GO:BP	0.00064934	Q9DCW4,Q99LC5,Q8BH04,P51660
150	cellular lipid catabolic process	GO:BP	0.000707059	Q9DCW4,Q99LC5,Q8BH04,P51660
150	lipid catabolic process	GO:BP	0.00113815	Q9DCW4,Q99LC5,Q8BH04,P51660
150	carboxylic acid catabolic process	GO:BP	0.006439	Q9DCW4,Q99LC5,Q8BH04,P51660
150	organic acid catabolic process	GO:BP	0.006439	Q9DCW4,Q99LC5,Q8BH04,P51660
150	fatty acid metabolic process	GO:BP	0.00778183	Q9DCW4,Q99LC5,Q8BH04,P51660
150	small molecule catabolic process	GO:BP	0.00974355	Q9DCW4,Q99LC5,Q8BH04,P51660
150	monocarboxylic acid metabolic process	GO:BP	0.0256086	Q9DCW4,Q99LC5,Q8BH04,P51660
150	fatty acid beta-oxidation	GO:BP	0.0277316	Q9DCW4,Q99LC5,P51660
150	cellular lipid metabolic process	GO:BP	0.0356005	Q9DCW4,Q99LC5,Q8BH04,P51660
150	lipid oxidation	GO:BP	0.0408292	Q9DCW4,Q99LC5,P51660
150	fatty acid oxidation	GO:BP	0.0408292	Q9DCW4,Q99LC5,P51660
150	lipid modification	GO:BP	0.0470367	Q9DCW4,Q99LC5,P51660
152	mitochondrial electron transport, ubiquinol to cytochrome c	GO:BP	8.34703e-05	Q9DB77,Q9CZ13,Q9CQ69,Q8R1I1
152	aerobic electron transport chain	GO:BP	0.0254417	Q9DB77,Q9CZ13,Q9CQ69,Q8R1I1
152	oxidative phosphorylation	GO:BP	0.0291092	Q9DB77,Q9CZ13,Q9CQ69,Q8R1I1,Q9DCS9
152	mitochondrial ATP synthesis coupled electron transport	GO:BP	0.0495971	Q9DB77,Q9CZ13,Q9CQ69,Q8R1I1
153	mitochondrial electron transport, ubiquinol to cytochrome c	GO:BP	9.40139e-05	Q9DB77,Q9CZ13,Q9CQ69,Q8R1I1
153	aerobic electron transport chain	GO:BP	0.0286554	Q9DB77,Q9CZ13,Q9CQ69,Q8R1I1
153	oxidative phosphorylation	GO:BP	0.0327862	P56480,Q9DB77,Q9CZ13,Q9CQ69,Q8R1I1
156	aerobic electron transport chain	GO:BP	0.00493411	Q9DB77,Q9D6J6,P99028,Q91YT0,Q91WD5
156	mitochondrial ATP synthesis coupled electron transport	GO:BP	0.0112516	Q9DB77,Q9D6J6,P99028,Q91YT0,Q91WD5
156	ATP synthesis coupled electron transport	GO:BP	0.0122259	Q9DB77,Q9D6J6,P99028,Q91YT0,Q91WD5
156	oxidative phosphorylation	GO:BP	0.0237497	Q9DB77,Q9D6J6,P99028,Q91YT0,Q91WD5,Q9DC69
156	respiratory electron transport chain	GO:BP	0.0319276	Q9DB77,Q9D6J6,P99028,Q91YT0,Q91WD5
156	electron transport chain	GO:BP	0.0413302	Q9DB77,Q9D6J6,P99028,Q91YT0,Q91WD5
158	mitochondrial electron transport, ubiquinol to cytochrome c	GO:BP	0.00494052	Q9DB77,Q9CZ13,Q8R1I1
158	oxidative phosphorylation	GO:BP	0.0118888	P56480,Q9DCX2,Q9DB77,Q9CZ13,Q8R1I1
158	aerobic respiration	GO:BP	0.0318849	P56480,Q9DCX2,Q9DB77,Q9CZ13,Q8R1I1
159	mitochondrial electron transport, ubiquinol to cytochrome c	GO:BP	0.00194271	P99028,Q9CR68
159	aerobic electron transport chain	GO:BP	0.0305104	P99028,Q9CR68
159	mitochondrial ATP synthesis coupled electron transport	GO:BP	0.042615	P99028,Q9CR68
159	ATP synthesis coupled electron transport	GO:BP	0.0440845	P99028,Q9CR68
163	respiratory electron transport chain	GO:BP	0.00148181	Q9CZ13,Q8R1I1,Q9CPP6,Q99LC3,NA,NA,NA,NA
163	electron transport chain	GO:BP	0.00184237	Q9CZ13,Q8R1I1,Q9CPP6,Q99LC3,NA,NA,NA,NA
163	oxidative phosphorylation	GO:BP	0.00908457	Q9CZ13,Q8R1I1,Q9CPP6,Q99LC3
163	aerobic respiration	GO:BP	0.0202737	Q9CZ13,Q8R1I1,Q9CPP6,Q99LC3
163	aerobic electron transport chain	GO:BP	0.0282781	Q9CZ13,Q8R1I1,Q99LC3
163	cellular respiration	GO:BP	0.0385859	Q9CZ13,Q8R1I1,Q9CPP6,Q99LC3
163	energy derivation by oxidation of organic compounds	GO:BP	0.0395506	Q9CZ13,Q8R1I1,Q9CPP6,Q99LC3
163	mitochondrial ATP synthesis coupled electron transport	GO:BP	0.046604	Q9CZ13,Q8R1I1,Q99LC3
163	ATP synthesis coupled electron transport	GO:BP	0.0490219	Q9CZ13,Q8R1I1,Q99LC3
167	proton motive force-driven ATP synthesis	GO:BP	1.27371e-14	Q9Z1P6,Q9DCJ5,Q91VD9,Q9CQQ7,Q9CPQ8,Q9CQZ5,Q9CQJ8,Q9CQC7,Q9CPP6,Q9DCS9,Q9DC70,Q9CQZ6,Q9CPU2,Q91YT0,Q99LY9,Q9D6J5,Q9CQ54,Q8K3J1,Q3UIU2,Q9CQH3,Q91WD5,Q9DCT2,Q9DC69,P56135,Q7TMF3,Q8BK30
167	proton motive force-driven mitochondrial ATP synthesis	GO:BP	3.24725e-14	Q9Z1P6,Q9DCJ5,Q91VD9,Q9CQQ7,Q9CQZ5,Q9CQJ8,Q9CQC7,Q9CPP6,Q9DCS9,Q9DC70,Q9CQZ6,Q9CPU2,Q91YT0,Q99LY9,Q9D6J5,Q9CQ54,Q8K3J1,Q3UIU2,Q9CQH3,Q91WD5,Q9DCT2,Q9DC69,P56135,Q7TMF3,Q8BK30
167	ATP biosynthetic process	GO:BP	1.29903e-12	Q9Z1P6,Q9DCJ5,Q91VD9,Q9CQQ7,Q9CPQ8,Q9CQZ5,Q9CQJ8,Q9CQC7,Q9CPP6,Q9DCS9,Q9DC70,Q9CQZ6,Q9CPU2,Q91YT0,Q99LY9,Q9D6J5,Q9CQ54,Q8K3J1,Q3UIU2,Q9CQH3,Q91WD5,Q9DCT2,Q9DC69,P56135,Q7TMF3,Q8BK30
167	purine nucleoside triphosphate biosynthetic process	GO:BP	1.29903e-12	Q9Z1P6,Q9DCJ5,Q91VD9,Q9CQQ7,Q9CPQ8,Q9CQZ5,Q9CQJ8,Q9CQC7,Q9CPP6,Q9DCS9,Q9DC70,Q9CQZ6,Q9CPU2,Q91YT0,Q99LY9,Q9D6J5,Q9CQ54,Q8K3J1,Q3UIU2,Q9CQH3,Q91WD5,Q9DCT2,Q9DC69,P56135,Q7TMF3,Q8BK30
167	purine ribonucleoside triphosphate biosynthetic process	GO:BP	1.29903e-12	Q9Z1P6,Q9DCJ5,Q91VD9,Q9CQQ7,Q9CPQ8,Q9CQZ5,Q9CQJ8,Q9CQC7,Q9CPP6,Q9DCS9,Q9DC70,Q9CQZ6,Q9CPU2,Q91YT0,Q99LY9,Q9D6J5,Q9CQ54,Q8K3J1,Q3UIU2,Q9CQH3,Q91WD5,Q9DCT2,Q9DC69,P56135,Q7TMF3,Q8BK30
167	ribonucleoside triphosphate biosynthetic process	GO:BP	1.29903e-12	Q9Z1P6,Q9DCJ5,Q91VD9,Q9CQQ7,Q9CPQ8,Q9CQZ5,Q9CQJ8,Q9CQC7,Q9CPP6,Q9DCS9,Q9DC70,Q9CQZ6,Q9CPU2,Q91YT0,Q99LY9,Q9D6J5,Q9CQ54,Q8K3J1,Q3UIU2,Q9CQH3,Q91WD5,Q9DCT2,Q9DC69,P56135,Q7TMF3,Q8BK30
167	nucleoside triphosphate biosynthetic process	GO:BP	1.88955e-12	Q9Z1P6,Q9DCJ5,Q91VD9,Q9CQQ7,Q9CPQ8,Q9CQZ5,Q9CQJ8,Q9CQC7,Q9CPP6,Q9DCS9,Q9DC70,Q9CQZ6,Q9CPU2,Q91YT0,Q99LY9,Q9D6J5,Q9CQ54,Q8K3J1,Q3UIU2,Q9CQH3,Q91WD5,Q9DCT2,Q9DC69,P56135,Q7TMF3,Q8BK30
167	mitochondrial respiratory chain complex I assembly	GO:BP	1.9479e-12	Q9DCJ5,Q91VD9,Q9CQZ5,Q9CQJ8,Q9CQC7,Q9CPP6,Q9DCS9,Q9DC70,Q9CQZ6,Q9CPU2,Q99LY9,Q9D6J5,Q9CQ54,Q8K3J1,Q3UIU2,Q9CQH3,Q91WD5,Q9DCT2,Q9DC69,Q8JZN5,Q9CZP5,A2APY7
167	NADH dehydrogenase complex assembly	GO:BP	1.9479e-12	Q9DCJ5,Q91VD9,Q9CQZ5,Q9CQJ8,Q9CQC7,Q9CPP6,Q9DCS9,Q9DC70,Q9CQZ6,Q9CPU2,Q99LY9,Q9D6J5,Q9CQ54,Q8K3J1,Q3UIU2,Q9CQH3,Q91WD5,Q9DCT2,Q9DC69,Q8JZN5,Q9CZP5,A2APY7
167	purine nucleotide biosynthetic process	GO:BP	6.28352e-12	Q9Z1P6,Q9DCJ5,Q91VD9,Q9CQQ7,Q9CPQ8,P63030,Q9CQZ5,Q9CQJ8,Q9CQC7,Q9CPP6,Q9DCS9,Q9DC70,Q9CQZ6,Q9CPU2,Q91YT0,Q99LY9,Q91WC3,Q9D6J5,Q9CQ54,Q8K3J1,Q3UIU2,Q9CQH3,Q91WD5,Q9DCT2,P41216,Q9DC69,P56135,Q7TMF3,Q8BK30
167	purine ribonucleotide biosynthetic process	GO:BP	6.28352e-12	Q9Z1P6,Q9DCJ5,Q91VD9,Q9CQQ7,Q9CPQ8,P63030,Q9CQZ5,Q9CQJ8,Q9CQC7,Q9CPP6,Q9DCS9,Q9DC70,Q9CQZ6,Q9CPU2,Q91YT0,Q99LY9,Q91WC3,Q9D6J5,Q9CQ54,Q8K3J1,Q3UIU2,Q9CQH3,Q91WD5,Q9DCT2,P41216,Q9DC69,P56135,Q7TMF3,Q8BK30
167	ATP metabolic process	GO:BP	7.20542e-12	Q9Z1P6,Q9DCJ5,Q91VD9,Q9CQQ7,Q9CPQ8,Q9CQZ5,Q9CQJ8,Q9CQC7,Q9CPP6,Q9DCS9,Q9DC70,Q9CQZ6,Q9CPU2,Q91YT0,Q99LY9,Q9D6J5,Q9CQ54,Q8K3J1,Q3UIU2,Q9CQH3,Q91WD5,Q791V5,Q9DCT2,Q9DC69,P56135,Q7TMF3,Q8BK30
167	purine-containing compound biosynthetic process	GO:BP	8.4102e-12	Q9Z1P6,Q9DCJ5,Q91VD9,Q9CQQ7,Q9CPQ8,P63030,Q9CQZ5,Q9CQJ8,Q9CQC7,Q9CPP6,Q9DCS9,Q9DC70,Q9CQZ6,Q9CPU2,Q91YT0,Q99LY9,Q91WC3,Q9D6J5,Q9CQ54,Q8K3J1,Q3UIU2,Q9CQH3,Q91WD5,Q9DCT2,P41216,Q9DC69,P56135,Q7TMF3,Q8BK30
167	ribonucleotide biosynthetic process	GO:BP	1.1215e-11	Q9Z1P6,Q9DCJ5,Q91VD9,Q9CQQ7,Q9CPQ8,P63030,Q9CQZ5,Q9CQJ8,Q9CQC7,Q9CPP6,Q9DCS9,Q9DC70,Q9CQZ6,Q9CPU2,Q91YT0,Q99LY9,Q91WC3,Q9D6J5,Q9CQ54,Q8K3J1,Q3UIU2,Q9CQH3,Q91WD5,Q9DCT2,P41216,Q9DC69,P56135,Q7TMF3,Q8BK30
167	ribose phosphate biosynthetic process	GO:BP	1.1215e-11	Q9Z1P6,Q9DCJ5,Q91VD9,Q9CQQ7,Q9CPQ8,P63030,Q9CQZ5,Q9CQJ8,Q9CQC7,Q9CPP6,Q9DCS9,Q9DC70,Q9CQZ6,Q9CPU2,Q91YT0,Q99LY9,Q91WC3,Q9D6J5,Q9CQ54,Q8K3J1,Q3UIU2,Q9CQH3,Q91WD5,Q9DCT2,P41216,Q9DC69,P56135,Q7TMF3,Q8BK30
167	oxidative phosphorylation	GO:BP	1.36609e-11	Q9Z1P6,Q9DCJ5,Q91VD9,P99028,Q9CQQ7,Q9CQZ5,Q9CQJ8,Q9CQC7,Q9CPP6,Q9DCS9,Q9DC70,Q9CQZ6,Q9CPU2,Q91YT0,Q99LY9,Q9D6J5,Q9CQ54,Q8K3J1,Q3UIU2,Q9CQH3,Q91WD5,Q61387,Q791V5,Q9DCT2,Q9DC69,P97478,P56135,Q7TMF3,Q8BK30,P00158
167	purine ribonucleoside triphosphate metabolic process	GO:BP	1.37286e-11	Q9Z1P6,Q9DCJ5,Q91VD9,Q9CQQ7,Q9CPQ8,Q9CQZ5,Q9CQJ8,Q9CQC7,Q9CPP6,Q9DCS9,Q9DC70,Q9CQZ6,Q9CPU2,Q91YT0,Q99LY9,Q9D6J5,Q9CQ54,Q8K3J1,Q3UIU2,Q9CQH3,Q91WD5,Q791V5,Q9DCT2,Q9DC69,P56135,Q7TMF3,Q8BK30
167	ribonucleoside triphosphate metabolic process	GO:BP	1.37286e-11	Q9Z1P6,Q9DCJ5,Q91VD9,Q9CQQ7,Q9CPQ8,Q9CQZ5,Q9CQJ8,Q9CQC7,Q9CPP6,Q9DCS9,Q9DC70,Q9CQZ6,Q9CPU2,Q91YT0,Q99LY9,Q9D6J5,Q9CQ54,Q8K3J1,Q3UIU2,Q9CQH3,Q91WD5,Q791V5,Q9DCT2,Q9DC69,P56135,Q7TMF3,Q8BK30
167	purine nucleoside triphosphate metabolic process	GO:BP	1.37286e-11	Q9Z1P6,Q9DCJ5,Q91VD9,Q9CQQ7,Q9CPQ8,Q9CQZ5,Q9CQJ8,Q9CQC7,Q9CPP6,Q9DCS9,Q9DC70,Q9CQZ6,Q9CPU2,Q91YT0,Q99LY9,Q9D6J5,Q9CQ54,Q8K3J1,Q3UIU2,Q9CQH3,Q91WD5,Q791V5,Q9DCT2,Q9DC69,P56135,Q7TMF3,Q8BK30
167	nucleoside triphosphate metabolic process	GO:BP	2.56666e-11	Q9Z1P6,Q9DCJ5,Q91VD9,Q9CQQ7,Q9CPQ8,Q9CQZ5,Q9CQJ8,Q9CQC7,Q9CPP6,Q9DCS9,Q9DC70,Q9CQZ6,Q9CPU2,Q91YT0,Q99LY9,Q9D6J5,Q9CQ54,Q8K3J1,Q3UIU2,Q9CQH3,Q91WD5,Q791V5,Q9DCT2,Q9DC69,P56135,Q7TMF3,Q8BK30
167	carbohydrate derivative biosynthetic process	GO:BP	7.62978e-11	Q9Z1P6,Q9DCJ5,Q91VD9,Q9CQQ7,Q9CPQ8,P63030,Q9CQZ5,Q9CQJ8,Q9CQC7,Q9CPP6,Q9DCS9,Q9DC70,Q9CQZ6,Q9CPU2,Q91YT0,Q99LY9,Q91WC3,Q9D6J5,Q9CQ54,Q8K3J1,Q3UIU2,Q9CQH3,Q91WD5,Q9DCT2,P41216,Q9DC69,P56135,Q7TMF3,Q8BK30
167	nucleotide biosynthetic process	GO:BP	9.90406e-11	Q9Z1P6,Q9DCJ5,Q91VD9,Q9CQQ7,Q9CPQ8,P63030,Q9CQZ5,Q9CQJ8,Q9CQC7,Q9CPP6,Q9DCS9,Q9DC70,Q9CQZ6,Q9CPU2,Q91YT0,Q99LY9,Q91WC3,Q9D6J5,Q9CQ54,Q8K3J1,Q3UIU2,Q9CQH3,Q91WD5,Q9DCT2,P41216,Q9DC69,P56135,Q7TMF3,Q8BK30
167	nucleoside phosphate biosynthetic process	GO:BP	9.90406e-11	Q9Z1P6,Q9DCJ5,Q91VD9,Q9CQQ7,Q9CPQ8,P63030,Q9CQZ5,Q9CQJ8,Q9CQC7,Q9CPP6,Q9DCS9,Q9DC70,Q9CQZ6,Q9CPU2,Q91YT0,Q99LY9,Q91WC3,Q9D6J5,Q9CQ54,Q8K3J1,Q3UIU2,Q9CQH3,Q91WD5,Q9DCT2,P41216,Q9DC69,P56135,Q7TMF3,Q8BK30
167	generation of precursor metabolites and energy	GO:BP	2.49613e-09	Q9Z1P6,Q9DCJ5,Q91VD9,P99028,Q9CQQ7,Q9CQZ5,Q9CQJ8,Q9CQC7,Q9CPP6,Q921G7,Q9DCS9,Q9DC70,Q9CQZ6,Q9CPU2,Q91YT0,Q99LY9,Q9D6J5,Q9CQ54,Q8K3J1,Q3UIU2,Q9CQH3,Q91WD5,Q61387,Q791V5,Q9DCT2,Q9DC69,Q62425,Q9DB41,Q8K1R3,P97478,P56135,Q7TMF3,Q8BK30,P00158,O35129
167	aerobic respiration	GO:BP	4.91709e-09	Q9Z1P6,Q9DCJ5,Q91VD9,P99028,Q9CQQ7,Q9CQZ5,Q9CQJ8,Q9CQC7,Q9CPP6,Q9DCS9,Q9DC70,Q9CQZ6,Q9CPU2,Q91YT0,Q99LY9,Q9D6J5,Q9CQ54,Q8K3J1,Q3UIU2,Q9CQH3,Q91WD5,Q61387,Q791V5,Q9DCT2,Q9DC69,P97478,P56135,Q7TMF3,Q8BK30,P00158
167	cellular respiration	GO:BP	1.0592e-08	Q9Z1P6,Q9DCJ5,Q91VD9,P99028,Q9CQQ7,Q9CQZ5,Q9CQJ8,Q9CQC7,Q9CPP6,Q9DCS9,Q9DC70,Q9CQZ6,Q9CPU2,Q91YT0,Q99LY9,Q9D6J5,Q9CQ54,Q8K3J1,Q3UIU2,Q9CQH3,Q91WD5,Q61387,Q791V5,Q9DCT2,Q9DC69,Q9DB41,Q8K1R3,P97478,P56135,Q7TMF3,Q8BK30,P00158
167	energy derivation by oxidation of organic compounds	GO:BP	1.27137e-08	Q9Z1P6,Q9DCJ5,Q91VD9,P99028,Q9CQQ7,Q9CQZ5,Q9CQJ8,Q9CQC7,Q9CPP6,Q9DCS9,Q9DC70,Q9CQZ6,Q9CPU2,Q91YT0,Q99LY9,Q9D6J5,Q9CQ54,Q8K3J1,Q3UIU2,Q9CQH3,Q91WD5,Q61387,Q791V5,Q9DCT2,Q9DC69,Q9DB41,Q8K1R3,P97478,P56135,Q7TMF3,Q8BK30,P00158
167	organophosphate biosynthetic process	GO:BP	1.5615e-08	Q9Z1P6,Q9DCJ5,Q91VD9,Q9CQQ7,Q9CPQ8,P63030,Q9CQZ5,Q9CQJ8,Q9CQC7,Q9CPP6,Q9DCS9,Q9DC70,Q9CQZ6,Q9CPU2,Q91YT0,Q99LY9,Q91WC3,Q9D6J5,Q9CQ54,Q8K3J1,Q3UIU2,Q9CQH3,Q91WD5,Q9DCT2,P41216,Q9DC69,P56135,Q7TMF3,Q8BK30
167	mitochondrial respiratory chain complex assembly	GO:BP	4.91346e-08	Q9DCJ5,Q91VD9,Q9CQZ5,Q9CQJ8,Q9CQC7,Q9CPP6,Q8CC21,Q9DCS9,Q9DC70,Q9CQZ6,Q9CPU2,Q99LY9,Q9D6J5,Q9CQ54,Q8K3J1,Q3UIU2,Q9CQH3,Q91WD5,Q9DCT2,Q9DC69,Q8JZN5,Q9CZP5,A2APY7
167	purine ribonucleotide metabolic process	GO:BP	7.38201e-08	Q9Z1P6,Q9DCJ5,Q91VD9,Q9CQQ7,Q9CPQ8,P63030,Q9CQZ5,Q9CQJ8,Q9CQC7,Q9CPP6,Q9DCS9,Q9DC70,Q9CQZ6,Q9CPU2,Q91YT0,Q99LY9,Q91WC3,Q9D6J5,Q9CQ54,Q8K3J1,Q3UIU2,Q9CQH3,Q91WD5,Q791V5,Q9DCT2,P41216,Q9DC69,P56135,Q7TMF3,Q8BK30
167	purine nucleotide metabolic process	GO:BP	8.84273e-08	Q9Z1P6,Q9DCJ5,Q91VD9,Q9CQQ7,Q9CPQ8,P63030,Q9CQZ5,Q9CQJ8,Q9CQC7,Q9CPP6,Q9DCS9,Q9DC70,Q9CQZ6,Q9CPU2,Q91YT0,Q99LY9,Q91WC3,Q9D6J5,Q9CQ54,Q8K3J1,Q3UIU2,Q9CQH3,Q91WD5,Q791V5,Q9DCT2,P41216,Q9DC69,P56135,Q7TMF3,Q8BK30
167	ribonucleotide metabolic process	GO:BP	1.05756e-07	Q9Z1P6,Q9DCJ5,Q91VD9,Q9CQQ7,Q9CPQ8,P63030,Q9CQZ5,Q9CQJ8,Q9CQC7,Q9CPP6,Q9DCS9,Q9DC70,Q9CQZ6,Q9CPU2,Q91YT0,Q99LY9,Q91WC3,Q9D6J5,Q9CQ54,Q8K3J1,Q3UIU2,Q9CQH3,Q91WD5,Q791V5,Q9DCT2,P41216,Q9DC69,P56135,Q7TMF3,Q8BK30
167	nucleobase-containing compound biosynthetic process	GO:BP	1.15701e-07	Q9Z1P6,Q9DCJ5,Q91VD9,Q9CQQ7,Q9CPQ8,P63030,Q9CQZ5,Q9CQJ8,Q9CQC7,Q9CPP6,Q9DCS9,Q9DC70,Q9CQZ6,Q9CPU2,Q91YT0,Q99LY9,Q91WC3,Q9D6J5,Q9CQ54,Q8K3J1,Q3UIU2,Q9CQH3,Q91WD5,Q9DCT2,P41216,Q9DC69,P97478,P56135,Q7TMF3,Q8BK30,O35129
167	purine-containing compound metabolic process	GO:BP	1.26282e-07	Q9Z1P6,Q9DCJ5,Q91VD9,Q9CQQ7,Q9CPQ8,P63030,Q9CQZ5,Q9CQJ8,Q9CQC7,Q9CPP6,Q9DCS9,Q9DC70,Q9CQZ6,Q9CPU2,Q91YT0,Q99LY9,Q91WC3,Q9D6J5,Q9CQ54,Q8K3J1,Q3UIU2,Q9CQH3,Q91WD5,Q791V5,Q9DCT2,P41216,Q9DC69,P56135,Q7TMF3,Q8BK30
167	ribose phosphate metabolic process	GO:BP	1.26282e-07	Q9Z1P6,Q9DCJ5,Q91VD9,Q9CQQ7,Q9CPQ8,P63030,Q9CQZ5,Q9CQJ8,Q9CQC7,Q9CPP6,Q9DCS9,Q9DC70,Q9CQZ6,Q9CPU2,Q91YT0,Q99LY9,Q91WC3,Q9D6J5,Q9CQ54,Q8K3J1,Q3UIU2,Q9CQH3,Q91WD5,Q791V5,Q9DCT2,P41216,Q9DC69,P56135,Q7TMF3,Q8BK30
167	carbohydrate derivative metabolic process	GO:BP	4.33138e-07	Q9Z1P6,Q9DCJ5,Q91VD9,Q9CQQ7,Q9CPQ8,P63030,Q9CQZ5,Q9CQJ8,Q9CQC7,Q9CPP6,Q9DCS9,Q9DC70,Q9CQZ6,Q9CPU2,Q91YT0,Q64521,Q99LY9,Q91WC3,Q9D6J5,Q9CQ54,Q8K3J1,Q3UIU2,Q9CQH3,Q91WD5,Q791V5,Q9DCT2,P41216,Q9DC69,P56135,Q7TMF3,Q8BK30
167	aromatic compound biosynthetic process	GO:BP	2.6986e-06	Q9Z1P6,Q9DCJ5,Q91VD9,Q9CQQ7,Q9CPQ8,P63030,Q9CQZ5,Q9CQJ8,Q9CQC7,Q9CPP6,Q9DCS9,Q9DC70,Q9CQZ6,Q9CPU2,Q91YT0,Q99LY9,Q91WC3,Q9D6J5,Q9CQ54,Q8K3J1,Q3UIU2,Q9CQH3,Q91WD5,Q9DCT2,P41216,Q9DC69,P97478,P56135,Q7TMF3,Q8BK30,O35129
167	heterocycle biosynthetic process	GO:BP	4.78765e-06	Q9Z1P6,Q9DCJ5,Q91VD9,Q9CQQ7,Q9CPQ8,P63030,Q9CQZ5,Q9CQJ8,Q9CQC7,Q9CPP6,Q9DCS9,Q9DC70,Q9CQZ6,Q9CPU2,Q91YT0,Q99LY9,Q91WC3,Q9D6J5,Q9CQ54,Q8K3J1,Q3UIU2,Q9CQH3,Q91WD5,Q9DCT2,P41216,Q9DC69,P97478,P56135,Q7TMF3,Q8BK30,O35129
167	nucleotide metabolic process	GO:BP	6.75979e-06	Q9Z1P6,Q9DCJ5,Q91VD9,Q9CQQ7,Q9CPQ8,P63030,Q9CQZ5,Q9CQJ8,Q9CQC7,Q9CPP6,Q9DCS9,Q9DC70,Q9CQZ6,Q9CPU2,Q91YT0,Q99LY9,Q91WC3,Q9D6J5,Q9CQ54,Q8K3J1,Q3UIU2,Q9CQH3,Q91WD5,Q791V5,Q9DCT2,P41216,Q9DC69,P56135,Q7TMF3,Q8BK30
167	nucleoside phosphate metabolic process	GO:BP	6.75979e-06	Q9Z1P6,Q9DCJ5,Q91VD9,Q9CQQ7,Q9CPQ8,P63030,Q9CQZ5,Q9CQJ8,Q9CQC7,Q9CPP6,Q9DCS9,Q9DC70,Q9CQZ6,Q9CPU2,Q91YT0,Q99LY9,Q91WC3,Q9D6J5,Q9CQ54,Q8K3J1,Q3UIU2,Q9CQH3,Q91WD5,Q791V5,Q9DCT2,P41216,Q9DC69,P56135,Q7TMF3,Q8BK30
167	protein-containing complex assembly	GO:BP	9.32479e-06	Q9DCJ5,Q91VD9,Q9CQT9,Q9CQZ5,Q9CQJ8,Q9CQC7,Q9CPP6,Q8CC21,Q9DCS9,Q9DC70,Q9CQZ6,Q9CPU2,Q99LY9,Q9D6J5,Q9CQ54,Q8K3J1,Q3UIU2,Q9CQH3,Q91WD5,Q61387,Q9DCT2,Q9DC69,Q8JZN5,Q60930,Q9CZP5,Q8K1R3,O70337,A2APY7
167	nucleobase-containing small molecule metabolic process	GO:BP	1.03468e-05	Q9Z1P6,Q9DCJ5,Q91VD9,Q9CQQ7,Q9CPQ8,P63030,Q9CQZ5,Q9CQJ8,Q9CQC7,Q9CPP6,Q9DCS9,Q9DC70,Q9CQZ6,Q9CPU2,Q91YT0,Q99LY9,Q91WC3,Q9D6J5,Q9CQ54,Q8K3J1,Q3UIU2,Q9CQH3,Q91WD5,Q791V5,Q9DCT2,P41216,Q9DC69,P56135,Q7TMF3,Q8BK30
167	organophosphate metabolic process	GO:BP	1.44671e-05	Q9Z1P6,Q9DCJ5,Q91VD9,Q9CQQ7,Q9CPQ8,P63030,Q9CQZ5,Q9CQJ8,Q9CQC7,Q9CPP6,Q9DCS9,Q9DC70,Q9CQZ6,Q9CPU2,Q91YT0,Q64521,Q99LY9,Q91WC3,Q9D6J5,Q9CQ54,Q8K3J1,Q3UIU2,Q9CQH3,Q91WD5,Q791V5,Q9DCT2,P41216,Q9DC69,P56135,Q7TMF3,Q8BK30,O35129
167	protein-containing complex organization	GO:BP	1.96229e-05	Q9DCJ5,Q91VD9,Q9CQT9,Q9CQZ5,Q9CQJ8,Q9CQC7,Q9CPP6,Q8CC21,Q9DCS9,Q9DC70,Q9CQZ6,Q9CPU2,Q99LY9,Q9D6J5,Q9CQ54,Q8K3J1,Q3UIU2,Q9CQH3,Q91WD5,Q61387,Q9DCT2,Q9DC69,Q8JZN5,Q60930,Q9CZP5,Q8K1R3,O70337,A2APY7
167	organic cyclic compound biosynthetic process	GO:BP	2.75543e-05	Q9Z1P6,Q9DCJ5,Q91VD9,Q9CQQ7,Q9CPQ8,P63030,Q9CQZ5,Q9CQJ8,Q9CQC7,Q9CPP6,Q9DCS9,Q9DC70,Q9CQZ6,Q9CPU2,Q91YT0,Q99LY9,Q91WC3,Q9D6J5,Q9CQ54,Q8K3J1,Q3UIU2,Q9CQH3,Q91WD5,Q9DCT2,P41216,Q9DC69,P97478,P56135,Q7TMF3,Q8BK30,O35129
167	mitochondrion organization	GO:BP	3.022e-05	Q9DCJ5,Q91VD9,Q9CQT9,Q9CQZ5,Q9CQJ8,Q9CQC7,Q9DCC8,Q9CPP6,Q8CC21,Q9DCS9,Q9DC70,Q9CQZ6,Q9CPU2,Q99LY9,Q9D6J5,Q9CQ54,Q8K3J1,Q3UIU2,Q9CQH3,Q91WD5,Q61387,Q9CPQ3,Q791V5,Q5U458,Q9DCT2,Q9DC69,Q8JZN5,Q60930,Q9CZP5,Q8K1R3,P97478,Q9D880,O88741,O70337,O35129,A2APY7
167	phosphorus metabolic process	GO:BP	3.44384e-05	Q9Z1P6,Q9DCJ5,Q91VD9,Q9CQQ7,Q9CPQ8,P63030,Q9CQZ5,Q9CQJ8,Q9CQC7,Q9CPP6,Q9DCS9,Q9DC70,Q9CQZ6,Q9CPU2,Q91YT0,Q64521,Q99LY9,Q91WC3,Q9D6J5,Q9CQ54,Q8K3J1,Q3UIU2,Q9CQH3,Q91WD5,Q791V5,Q9DCT2,P41216,Q9DC69,Q9D880,P56135,Q7TMF3,Q8BK30,O35465,O35129
167	phosphate-containing compound metabolic process	GO:BP	3.44384e-05	Q9Z1P6,Q9DCJ5,Q91VD9,Q9CQQ7,Q9CPQ8,P63030,Q9CQZ5,Q9CQJ8,Q9CQC7,Q9CPP6,Q9DCS9,Q9DC70,Q9CQZ6,Q9CPU2,Q91YT0,Q64521,Q99LY9,Q91WC3,Q9D6J5,Q9CQ54,Q8K3J1,Q3UIU2,Q9CQH3,Q91WD5,Q791V5,Q9DCT2,P41216,Q9DC69,Q9D880,P56135,Q7TMF3,Q8BK30,O35465,O35129
167	cellular component assembly	GO:BP	0.000590664	Q9DCJ5,Q91VD9,Q9CQT9,Q9CQZ5,Q9CQJ8,Q9CQC7,Q9CPP6,Q8CC21,Q9DCS9,Q9DC70,Q9CQZ6,Q9CPU2,Q99LY9,Q9D6J5,Q9CQ54,Q8K3J1,Q3UIU2,Q9CQH3,Q91WD5,Q61387,Q9DCT2,Q9DC69,Q8JZN5,Q60930,Q9CZP5,Q8K1R3,O70337,A2APY7
167	electron transport chain	GO:BP	0.000592944	Q9Z1P6,Q91VD9,P99028,Q9CPP6,Q921G7,Q9DC70,Q91YT0,Q8K3J1,Q3UIU2,Q91WD5,Q791V5,Q9DCT2,Q9DB41,P97478,Q7TMF3,Q8BK30,P00158
167	respiratory electron transport chain	GO:BP	0.00154645	Q9Z1P6,Q91VD9,P99028,Q9CPP6,Q9DC70,Q91YT0,Q8K3J1,Q3UIU2,Q91WD5,Q791V5,Q9DCT2,Q9DB41,P97478,Q7TMF3,Q8BK30,P00158
167	organelle organization	GO:BP	0.00175386	Q9DCJ5,Q91VD9,Q9CQT9,Q9CQZ5,Q9CQJ8,Q9CQC7,Q9DCC8,Q9CPP6,Q8CC21,Q9DCS9,Q9DC70,Q9CQZ6,Q9CPU2,Q99LY9,Q9D6J5,Q9CQ54,Q8K3J1,Q3UIU2,Q9CQH3,Q91WD5,Q61387,Q9CPQ3,Q791V5,Q5U458,Q9DCT2,Q9DC69,Q8JZN5,Q60930,Q9CZP5,Q8K1R3,P97478,Q9D880,O88741,O70337,O35129,A2APY7
167	cellular component biogenesis	GO:BP	0.00281553	Q9DCJ5,Q91VD9,Q9CQT9,Q9CQZ5,Q9CQJ8,Q9CQC7,Q9CPP6,Q8CC21,Q9DCS9,Q9DC70,Q9CQZ6,Q9CPU2,Q99LY9,Q9D6J5,Q9CQ54,Q8K3J1,Q3UIU2,Q9CQH3,Q91WD5,Q61387,Q9DCT2,Q9DC69,Q8JZN5,Q60930,Q9CZP5,Q8K1R3,O70337,A2APY7
167	mitochondrial ATP synthesis coupled electron transport	GO:BP	0.00291249	Q9Z1P6,Q91VD9,P99028,Q9DC70,Q91YT0,Q8K3J1,Q3UIU2,Q91WD5,Q791V5,Q9DCT2,P97478,Q7TMF3,Q8BK30,P00158
167	ATP synthesis coupled electron transport	GO:BP	0.00362728	Q9Z1P6,Q91VD9,P99028,Q9DC70,Q91YT0,Q8K3J1,Q3UIU2,Q91WD5,Q791V5,Q9DCT2,P97478,Q7TMF3,Q8BK30,P00158
167	cellular component organization	GO:BP	0.0422563	Q9DCJ5,Q91VD9,Q9CQT9,Q9CQZ5,Q9CQJ8,Q9CQC7,Q9DCC8,Q9CPP6,Q8CC21,Q9DCS9,Q9DC70,Q9CQZ6,Q9CPU2,Q99LY9,Q91WC3,Q9D6J5,Q9CQ54,Q8K3J1,Q3UIU2,Q9CQH3,Q91WD5,Q61387,Q9CPQ3,Q791V5,Q5U458,Q9DCT2,Q9DC69,Q8JZN5,Q60930,Q9CZP5,Q8K1R3,P97478,Q9D880,O88741,O70337,O35129,A2APY7
170	AMP metabolic process	GO:BP	0.0314008	Q9WTP7,P56380
170	purine ribonucleoside monophosphate metabolic process	GO:BP	0.0469865	Q9WTP7,P56380
178	RNA phosphodiester bond hydrolysis, exonucleolytic	GO:BP	0.00781067	Q8C460,Q3TIU4
178	RNA phosphodiester bond hydrolysis	GO:BP	0.0465794	Q8C460,Q3TIU4
189	oxidative phosphorylation	GO:BP	0.0247838	Q8R1I1,P99028,Q9DCS9,Q9CPU2,O09111
1	membrane	GO:CC	1.44154e-09	Q9DCJ5,Q9D6J6,Q91VD9,Q8R1I1,P99028,Q9CR62,Q9CQT9,Q9CQQ7,Q9CPQ8,Q99JR1,Q91V61,Q8VEM8,Q8BH59,P63030,P50544,Q9CQZ5,Q9CQC7,Q9DCC8,Q9D8W7,Q9CQ75,Q9CPP6,Q921G7,Q8JZQ2,Q8CC21,Q9DC70,Q91YT0,Q64521,Q9CQN1,Q99LY9,Q91WS0,Q91WC3,Q9CQ54,Q8K3J1,Q91WD5,Q8K2B3,Q61387,P58281,Q922Q1,Q78IK2,Q5U458,Q9DCZ4,Q9DCT2,Q9DCN2,Q9CZW5,Q9CQ85,P67778,P41216,Q9DC69,Q8JZN5,Q62425,P56382,Q8BW75,Q64133,Q9DB41,Q9CZP5,Q8K1R3,P97478,…
1	inner mitochondrial membrane protein complex	GO:CC	1.54871e-09	Q9DCJ5,Q9D6J6,Q91VD9,Q8R1I1,P99028,Q9CQQ7,Q9CPQ8,Q9CQZ5,Q9CQC7,Q9CQ75,Q9CPP6,Q8JZQ2,Q9DC70,Q91YT0,Q99LY9,Q9CQ54,Q8K3J1,Q91WD5,Q8K2B3,Q78IK2,Q5U458,Q9DCZ4,Q9DCT2,Q9CQ85,P67778,Q9DC69,Q62425,P56382,Q9D880,P56135,Q8VCX5,Q7TMF3,Q8BK30,P00158,O35129
1	mitochondrial envelope	GO:CC	1.75853e-08	Q9DCJ5,Q9D6J6,Q91VD9,Q8R1I1,P99028,Q9CR62,Q9CQT9,Q9CQQ7,Q9CPQ8,Q99JR1,Q91V61,Q8VEM8,Q8BH59,P63030,P50544,Q9CQZ5,Q9CQC7,Q9DCC8,Q9D8W7,Q9CQ75,Q9CPP6,Q921G7,Q8JZQ2,Q8CC21,Q9DC70,Q91YT0,Q64521,Q9CQN1,Q99LY9,Q91WS0,Q9CQ54,Q8K3J1,Q91WD5,Q8K2B3,Q61387,P58281,Q922Q1,Q78IK2,Q5U458,Q9DCZ4,Q9DCT2,Q9DCN2,Q9CZW5,Q9CQ85,P67778,P41216,Q9DC69,Q8JZN5,Q62425,P56382,Q8BW75,Q64133,Q8R086,Q9DB41,Q9CZP5,Q8K1R3,P97478,…
1	organelle membrane	GO:CC	2.87423e-08	Q9DCJ5,Q9D6J6,Q91VD9,Q8R1I1,P99028,Q9CR62,Q9CQT9,Q9CQQ7,Q9CPQ8,Q99JR1,Q91V61,Q8VEM8,Q8BH59,P63030,P50544,Q9CQZ5,Q9CQC7,Q9DCC8,Q9D8W7,Q9CQ75,Q9CPP6,Q921G7,Q8JZQ2,Q8CC21,Q9DC70,Q91YT0,Q64521,Q9CQN1,Q99LY9,Q91WS0,Q9CQ54,Q8K3J1,Q91WD5,Q8K2B3,Q61387,P58281,Q922Q1,Q78IK2,Q5U458,Q9DCZ4,Q9DCT2,Q9DCN2,Q9CZW5,Q9CQ85,P67778,P41216,Q9DC69,Q8JZN5,Q62425,P56382,Q8BW75,Q64133,Q9DB41,Q9CZP5,Q8K1R3,P97478,Q9D880,…
1	envelope	GO:CC	3.95976e-08	Q9DCJ5,Q9D6J6,Q91VD9,Q8R1I1,P99028,Q9CR62,Q9CQT9,Q9CQQ7,Q9CPQ8,Q99JR1,Q91V61,Q8VEM8,Q8BH59,P63030,P50544,Q9CQZ5,Q9CQC7,Q9DCC8,Q9D8W7,Q9CQ75,Q9CPP6,Q921G7,Q8JZQ2,Q8CC21,Q9DC70,Q91YT0,Q64521,Q9CQN1,Q99LY9,Q91WS0,Q9CQ54,Q8K3J1,Q91WD5,Q8K2B3,Q61387,P58281,Q922Q1,Q78IK2,Q5U458,Q9DCZ4,Q9DCT2,Q9DCN2,Q9CZW5,Q9CQ85,P67778,P41216,Q9DC69,Q8JZN5,Q62425,P56382,Q8BW75,Q64133,Q8R086,Q9DB41,Q9CZP5,Q8K1R3,P97478,…
1	organelle envelope	GO:CC	3.95976e-08	Q9DCJ5,Q9D6J6,Q91VD9,Q8R1I1,P99028,Q9CR62,Q9CQT9,Q9CQQ7,Q9CPQ8,Q99JR1,Q91V61,Q8VEM8,Q8BH59,P63030,P50544,Q9CQZ5,Q9CQC7,Q9DCC8,Q9D8W7,Q9CQ75,Q9CPP6,Q921G7,Q8JZQ2,Q8CC21,Q9DC70,Q91YT0,Q64521,Q9CQN1,Q99LY9,Q91WS0,Q9CQ54,Q8K3J1,Q91WD5,Q8K2B3,Q61387,P58281,Q922Q1,Q78IK2,Q5U458,Q9DCZ4,Q9DCT2,Q9DCN2,Q9CZW5,Q9CQ85,P67778,P41216,Q9DC69,Q8JZN5,Q62425,P56382,Q8BW75,Q64133,Q8R086,Q9DB41,Q9CZP5,Q8K1R3,P97478,…
1	mitochondrial membrane	GO:CC	5.42147e-08	Q9DCJ5,Q9D6J6,Q91VD9,Q8R1I1,P99028,Q9CR62,Q9CQT9,Q9CQQ7,Q9CPQ8,Q99JR1,Q91V61,Q8VEM8,Q8BH59,P63030,P50544,Q9CQZ5,Q9CQC7,Q9DCC8,Q9D8W7,Q9CQ75,Q9CPP6,Q921G7,Q8JZQ2,Q8CC21,Q9DC70,Q91YT0,Q64521,Q9CQN1,Q99LY9,Q91WS0,Q9CQ54,Q8K3J1,Q91WD5,Q8K2B3,Q61387,P58281,Q922Q1,Q78IK2,Q5U458,Q9DCZ4,Q9DCT2,Q9DCN2,Q9CZW5,Q9CQ85,P67778,P41216,Q9DC69,Q8JZN5,Q62425,P56382,Q8BW75,Q64133,Q9DB41,Q9CZP5,P97478,Q9D880,Q99N92,…
1	membrane protein complex	GO:CC	7.93996e-08	Q9DCJ5,Q9D6J6,Q91VD9,Q8R1I1,P99028,Q9CQQ7,Q9CPQ8,Q9CQZ5,Q9CQC7,Q9DCC8,Q9CQ75,Q9CPP6,Q8JZQ2,Q9DC70,Q91YT0,Q99LY9,Q9CQ54,Q8K3J1,Q91WD5,Q8K2B3,Q78IK2,Q5U458,Q9DCZ4,Q9DCT2,Q9CZW5,Q9CQ85,P67778,Q9DC69,Q62425,P56382,Q9D880,P56135,Q8VCX5,Q7TMF3,Q8BK30,P00158,O35129
1	mitochondrial inner membrane	GO:CC	1.49792e-07	Q9DCJ5,Q9D6J6,Q91VD9,Q8R1I1,P99028,Q9CR62,Q9CQT9,Q9CQQ7,Q9CPQ8,Q99JR1,Q91V61,Q8VEM8,Q8BH59,P63030,P50544,Q9CQZ5,Q9CQC7,Q9D8W7,Q9CQ75,Q9CPP6,Q921G7,Q8JZQ2,Q8CC21,Q9DC70,Q91YT0,Q64521,Q9CQN1,Q99LY9,Q9CQ54,Q8K3J1,Q91WD5,Q8K2B3,Q61387,P58281,Q922Q1,Q78IK2,Q5U458,Q9DCZ4,Q9DCT2,Q9DCN2,Q9CQ85,P67778,Q9DC69,Q62425,P56382,Q8BW75,Q9DB41,Q9CZP5,P97478,Q9D880,Q99N92,Q8K1Z0,Q3TBW2,P56135,Q8VCX5,Q7TMF3,Q9D6M3,…
1	mitochondrial respirasome	GO:CC	1.63869e-07	Q9DCJ5,Q9D6J6,Q91VD9,Q8R1I1,P99028,Q9CQT9,Q9CQZ5,Q9CQC7,Q9CQ75,Q9CPP6,Q9DC70,Q91YT0,Q99LY9,Q9CQ54,Q8K3J1,Q91WD5,Q8K2B3,Q61387,Q9DCT2,Q9DC69,Q62425,Q7TMF3,Q8BK30,P00158
1	organelle inner membrane	GO:CC	1.69222e-07	Q9DCJ5,Q9D6J6,Q91VD9,Q8R1I1,P99028,Q9CR62,Q9CQT9,Q9CQQ7,Q9CPQ8,Q99JR1,Q91V61,Q8VEM8,Q8BH59,P63030,P50544,Q9CQZ5,Q9CQC7,Q9D8W7,Q9CQ75,Q9CPP6,Q921G7,Q8JZQ2,Q8CC21,Q9DC70,Q91YT0,Q64521,Q9CQN1,Q99LY9,Q9CQ54,Q8K3J1,Q91WD5,Q8K2B3,Q61387,P58281,Q922Q1,Q78IK2,Q5U458,Q9DCZ4,Q9DCT2,Q9DCN2,Q9CQ85,P67778,Q9DC69,Q62425,P56382,Q8BW75,Q9DB41,Q9CZP5,P97478,Q9D880,Q99N92,Q8K1Z0,Q3TBW2,P56135,Q8VCX5,Q7TMF3,Q9D6M3,…
1	oxidoreductase complex	GO:CC	1.86915e-07	Q9DCJ5,Q9D6J6,Q91VD9,Q8R1I1,P99028,Q9CQZ5,Q9CQC7,Q9CQ75,Q9CPP6,Q921G7,Q9DC70,Q91YT0,Q8BMF4,Q64521,Q99LY9,Q9CQ54,Q8K3J1,Q91WD5,Q8K2B3,Q9DCT2,Q9DCN2,Q9DC69,Q62425,Q7TMF3,Q8BK30,P00158
1	integral component of membrane	GO:CC	2.5307e-07	Q9DCJ5,Q9D6J6,Q91VD9,Q8R1I1,P99028,Q99JR1,Q91V61,Q8VEM8,P63030,Q9CQZ5,Q9CQC7,Q9DCC8,Q9CQ75,Q9CPP6,Q921G7,Q8JZQ2,Q9DC70,Q91YT0,Q99LY9,Q9CQ54,Q8K3J1,Q91WD5,Q5U458,Q9DCZ4,Q9DCT2,Q9CZW5,P67778,Q9DC69,Q62425,P59017,Q8VCX5,Q7TMF3,Q8BK30,P00158,O88741,O35465
1	mitochondrial respiratory chain complex I	GO:CC	2.67548e-07	Q9DCJ5,Q9D6J6,Q91VD9,Q9CQZ5,Q9CQC7,Q9CQ75,Q9CPP6,Q9DC70,Q91YT0,Q99LY9,Q9CQ54,Q8K3J1,Q91WD5,Q9DCT2,Q9DC69,Q62425,Q7TMF3,Q8BK30
1	respiratory chain complex I	GO:CC	2.67548e-07	Q9DCJ5,Q9D6J6,Q91VD9,Q9CQZ5,Q9CQC7,Q9CQ75,Q9CPP6,Q9DC70,Q91YT0,Q99LY9,Q9CQ54,Q8K3J1,Q91WD5,Q9DCT2,Q9DC69,Q62425,Q7TMF3,Q8BK30
1	NADH dehydrogenase complex	GO:CC	2.67548e-07	Q9DCJ5,Q9D6J6,Q91VD9,Q9CQZ5,Q9CQC7,Q9CQ75,Q9CPP6,Q9DC70,Q91YT0,Q99LY9,Q9CQ54,Q8K3J1,Q91WD5,Q9DCT2,Q9DC69,Q62425,Q7TMF3,Q8BK30
1	respirasome	GO:CC	3.02297e-07	Q9DCJ5,Q9D6J6,Q91VD9,Q8R1I1,P99028,Q9CQT9,Q9CQZ5,Q9CQC7,Q9CQ75,Q9CPP6,Q9DC70,Q91YT0,Q99LY9,Q9CQ54,Q8K3J1,Q91WD5,Q8K2B3,Q61387,Q9DCT2,Q9DC69,Q62425,Q7TMF3,Q8BK30,P00158
1	transmembrane transporter complex	GO:CC	3.05217e-07	Q9DCJ5,Q9D6J6,Q91VD9,Q8R1I1,P99028,Q9CQZ5,Q9CQC7,Q9CQ75,Q9CPP6,Q9DC70,Q91YT0,Q99LY9,Q9CQ54,Q8K3J1,Q91WD5,Q9DCT2,Q9DC69,Q62425,Q8VCX5,Q7TMF3,Q8BK30,P00158
1	intrinsic component of membrane	GO:CC	3.6911e-07	Q9DCJ5,Q9D6J6,Q91VD9,Q8R1I1,P99028,Q99JR1,Q91V61,Q8VEM8,P63030,Q9CQZ5,Q9CQC7,Q9DCC8,Q9CQ75,Q9CPP6,Q921G7,Q8JZQ2,Q9DC70,Q91YT0,Q99LY9,Q9CQ54,Q8K3J1,Q91WD5,Q5U458,Q9DCZ4,Q9DCT2,Q9CZW5,P67778,Q9DC69,Q62425,P59017,Q8VCX5,Q7TMF3,Q8BK30,P00158,O88741,O35465
1	transporter complex	GO:CC	2.71265e-06	Q9DCJ5,Q9D6J6,Q91VD9,Q8R1I1,P99028,Q9CQZ5,Q9CQC7,Q9CQ75,Q9CPP6,Q9DC70,Q91YT0,Q99LY9,Q9CQ54,Q8K3J1,Q91WD5,Q9DCT2,Q9DC69,Q62425,Q8VCX5,Q7TMF3,Q8BK30,P00158
1	respiratory chain complex	GO:CC	4.78827e-06	Q9DCJ5,Q9D6J6,Q91VD9,Q8R1I1,P99028,Q9CQZ5,Q9CQC7,Q9CQ75,Q9CPP6,Q9DC70,Q91YT0,Q99LY9,Q9CQ54,Q8K3J1,Q91WD5,Q8K2B3,Q9DCT2,Q9DC69,Q62425,Q7TMF3,Q8BK30,P00158
1	mitochondrial protein-containing complex	GO:CC	0.000327214	Q9DCJ5,Q9D6J6,Q91VD9,Q8R1I1,P99028,Q9CQQ7,Q9CPQ8,Q9CQZ5,Q9CQC7,Q9DCC8,Q9CQ75,Q9CPP6,Q921G7,Q8JZQ2,Q9DC70,Q91YT0,Q8BMF4,Q99LY9,Q9CQ54,Q8K3J1,Q91WD5,Q8K2B3,Q78IK2,Q5U458,Q9DCZ4,Q9DCT2,Q9CZW5,Q9CQ85,P67778,Q9DC69,Q62425,P56382,Q8K1R3,Q9D880,Q99N92,Q3TBW2,P56135,Q8VCX5,Q7TMF3,Q8BK30,P00158,O35129
1	catalytic complex	GO:CC	0.00114692	Q9DCJ5,Q9D6J6,Q91VD9,Q8R1I1,P99028,Q9CQZ5,Q9CQC7,Q9CQ75,Q9CPP6,Q921G7,Q8JZQ2,Q9DC70,Q91YT0,Q8BMF4,Q64521,Q99LY9,Q9CQ54,Q8K3J1,Q91WD5,Q8K2B3,Q9DCT2,Q9DCN2,Q9DC69,Q62425,Q8K1R3,Q7TMF3,P05132,Q8BK30,P00158
1	protein-containing complex	GO:CC	0.00356203	Q9DCJ5,Q9D6J6,Q91VD9,Q8R1I1,P99028,Q9CQQ7,Q9CPQ8,Q9CQZ5,Q9CQC7,Q9DCC8,Q9CQ75,Q9CPP6,Q921G7,Q8JZQ2,Q9DC70,Q91YT0,Q8BMF4,Q64521,Q99LY9,Q9CQ54,Q8K3J1,Q91WD5,Q8K2B3,Q78IK2,Q5U458,Q9DCZ4,Q9DCT2,Q9DCN2,Q9CZW5,Q9CQ85,P67778,Q9DC69,Q62425,P56382,Q3UHB1,Q8K1R3,P97478,Q9D880,Q99N92,Q8K1Z0,Q3TBW2,P56135,Q8VCX5,Q7TMF3,P20108,P05132,Q8BK30,P00158,O35465,O70337,O35129
2	transmembrane transporter complex	GO:CC	0.0437808	Q9Z1P6,Q9CQ69,Q9CR21
3	membrane	GO:CC	6.09047e-10	Q9CR62,Q9CQT9,Q9CQQ7,Q9CPQ8,Q8VEM8,Q8BH59,P63030,P50544,Q9CQZ5,Q9DCC8,Q9D8W7,Q9CPP6,Q921G7,Q8JZQ2,Q8CC21,Q91YT0,Q8BFR5,Q64521,Q99LY9,Q91WS0,Q91WC3,Q9CQ54,Q8K3J1,Q91WD5,Q61387,Q60931,P58281,Q9CPQ3,Q922Q1,Q791V5,Q78IK2,Q5U458,Q9DCT2,Q9CQ85,P67778,Q9DC69,Q8JZN5,Q62425,Q60597,P56382,Q64133,Q9DB41,Q9CZP5,Q8K1R3,P97478,P03930,Q9D880,Q99N92,Q3TBW2,P59017,P56135,Q8VCX5,Q7TMF3,Q80SW1,Q9D6M3,Q8BK30,P00158,…
3	mitochondrial envelope	GO:CC	1.00642e-09	Q9CR62,Q9CQT9,Q9CQQ7,Q9CPQ8,Q8VEM8,Q8BH59,P63030,P50544,Q9CQZ5,Q9DCC8,Q9D8W7,Q9CPP6,Q921G7,Q8JZQ2,Q8CC21,Q91YT0,Q8BFR5,Q64521,Q99LY9,Q91WS0,Q9CQ54,Q8K3J1,Q91WD5,Q61387,Q60931,P58281,Q9CPQ3,Q922Q1,Q791V5,Q78IK2,Q5U458,Q9DCT2,Q9CQ85,P67778,Q9DC69,Q8JZN5,Q62425,Q60597,P56382,Q64133,Q8R086,Q9DB41,Q9CZP5,Q8K1R3,P97478,P03930,Q9D880,Q99N92,Q3TBW2,P56135,Q8VCX5,Q7TMF3,Q9D6M3,Q8BK30,P00158,O88741,O35465,…
3	organelle envelope	GO:CC	2.10185e-09	Q9CR62,Q9CQT9,Q9CQQ7,Q9CPQ8,Q8VEM8,Q8BH59,P63030,P50544,Q9CQZ5,Q9DCC8,Q9D8W7,Q9CPP6,Q921G7,Q8JZQ2,Q8CC21,Q91YT0,Q8BFR5,Q64521,Q99LY9,Q91WS0,Q9CQ54,Q8K3J1,Q91WD5,Q61387,Q60931,P58281,Q9CPQ3,Q922Q1,Q791V5,Q78IK2,Q5U458,Q9DCT2,Q9CQ85,P67778,Q9DC69,Q8JZN5,Q62425,Q60597,P56382,Q64133,Q8R086,Q9DB41,Q9CZP5,Q8K1R3,P97478,P03930,Q9D880,Q99N92,Q3TBW2,P56135,Q8VCX5,Q7TMF3,Q9D6M3,Q8BK30,P00158,O88741,O35465,…
3	envelope	GO:CC	2.10185e-09	Q9CR62,Q9CQT9,Q9CQQ7,Q9CPQ8,Q8VEM8,Q8BH59,P63030,P50544,Q9CQZ5,Q9DCC8,Q9D8W7,Q9CPP6,Q921G7,Q8JZQ2,Q8CC21,Q91YT0,Q8BFR5,Q64521,Q99LY9,Q91WS0,Q9CQ54,Q8K3J1,Q91WD5,Q61387,Q60931,P58281,Q9CPQ3,Q922Q1,Q791V5,Q78IK2,Q5U458,Q9DCT2,Q9CQ85,P67778,Q9DC69,Q8JZN5,Q62425,Q60597,P56382,Q64133,Q8R086,Q9DB41,Q9CZP5,Q8K1R3,P97478,P03930,Q9D880,Q99N92,Q3TBW2,P56135,Q8VCX5,Q7TMF3,Q9D6M3,Q8BK30,P00158,O88741,O35465,…
3	organelle membrane	GO:CC	4.60526e-09	Q9CR62,Q9CQT9,Q9CQQ7,Q9CPQ8,Q8VEM8,Q8BH59,P63030,P50544,Q9CQZ5,Q9DCC8,Q9D8W7,Q9CPP6,Q921G7,Q8JZQ2,Q8CC21,Q91YT0,Q8BFR5,Q64521,Q99LY9,Q91WS0,Q9CQ54,Q8K3J1,Q91WD5,Q61387,Q60931,P58281,Q9CPQ3,Q922Q1,Q791V5,Q78IK2,Q5U458,Q9DCT2,Q9CQ85,P67778,Q9DC69,Q8JZN5,Q62425,Q60597,P56382,Q64133,Q9DB41,Q9CZP5,Q8K1R3,P97478,P03930,Q9D880,Q99N92,Q3TBW2,P56135,Q8VCX5,Q7TMF3,Q9D6M3,Q8BK30,P00158,O88741,O35465,O35129,…
3	mitochondrial membrane	GO:CC	2.11565e-08	Q9CR62,Q9CQT9,Q9CQQ7,Q9CPQ8,Q8VEM8,Q8BH59,P63030,P50544,Q9CQZ5,Q9DCC8,Q9D8W7,Q9CPP6,Q921G7,Q8JZQ2,Q8CC21,Q91YT0,Q8BFR5,Q64521,Q99LY9,Q91WS0,Q9CQ54,Q8K3J1,Q91WD5,Q61387,Q60931,P58281,Q9CPQ3,Q922Q1,Q791V5,Q78IK2,Q5U458,Q9DCT2,Q9CQ85,P67778,Q9DC69,Q8JZN5,Q62425,Q60597,P56382,Q64133,Q9DB41,Q9CZP5,P97478,P03930,Q9D880,Q99N92,Q3TBW2,P56135,Q8VCX5,Q7TMF3,Q9D6M3,Q8BK30,P00158,O88741,O35129,A2APY7
3	mitochondrial inner membrane	GO:CC	1.78478e-07	Q9CR62,Q9CQT9,Q9CQQ7,Q9CPQ8,Q8VEM8,Q8BH59,P63030,P50544,Q9CQZ5,Q9D8W7,Q9CPP6,Q921G7,Q8JZQ2,Q8CC21,Q91YT0,Q8BFR5,Q64521,Q99LY9,Q9CQ54,Q8K3J1,Q91WD5,Q61387,Q60931,P58281,Q9CPQ3,Q922Q1,Q791V5,Q78IK2,Q5U458,Q9DCT2,Q9CQ85,P67778,Q9DC69,Q62425,P56382,Q9DB41,Q9CZP5,P97478,P03930,Q9D880,Q99N92,Q3TBW2,P56135,Q8VCX5,Q7TMF3,Q9D6M3,Q8BK30,P00158,O35129,A2APY7
3	organelle inner membrane	GO:CC	1.98191e-07	Q9CR62,Q9CQT9,Q9CQQ7,Q9CPQ8,Q8VEM8,Q8BH59,P63030,P50544,Q9CQZ5,Q9D8W7,Q9CPP6,Q921G7,Q8JZQ2,Q8CC21,Q91YT0,Q8BFR5,Q64521,Q99LY9,Q9CQ54,Q8K3J1,Q91WD5,Q61387,Q60931,P58281,Q9CPQ3,Q922Q1,Q791V5,Q78IK2,Q5U458,Q9DCT2,Q9CQ85,P67778,Q9DC69,Q62425,P56382,Q9DB41,Q9CZP5,P97478,P03930,Q9D880,Q99N92,Q3TBW2,P56135,Q8VCX5,Q7TMF3,Q9D6M3,Q8BK30,P00158,O35129,A2APY7
3	inner mitochondrial membrane protein complex	GO:CC	2.8936e-06	Q9CQQ7,Q9CPQ8,Q9CQZ5,Q9CPP6,Q8JZQ2,Q91YT0,Q99LY9,Q9CQ54,Q8K3J1,Q91WD5,Q78IK2,Q5U458,Q9DCT2,Q9CQ85,P67778,Q9DC69,Q62425,P56382,P03930,Q9D880,P56135,Q8VCX5,Q7TMF3,Q8BK30,P00158,O35129
3	membrane protein complex	GO:CC	2.2102e-05	Q9CQQ7,Q9CPQ8,Q9CQZ5,Q9DCC8,Q9CPP6,Q8JZQ2,Q91YT0,Q99LY9,Q9CQ54,Q8K3J1,Q91WD5,Q9CPQ3,Q78IK2,Q5U458,Q9DCT2,Q9CQ85,P67778,Q9DC69,Q62425,P56382,P03930,Q9D880,P56135,Q8VCX5,Q7TMF3,Q8BK30,P00158,O35129
3	oxidoreductase complex	GO:CC	0.000630536	Q9CQZ5,Q9CPP6,Q921G7,Q91YT0,Q8BMF4,Q64521,Q99LY9,Q9CQ54,Q8K3J1,Q91WD5,Q9DCT2,Q9DC69,Q9D051,Q62425,Q60597,Q7TMF3,Q8BK30,P00158
3	mitochondrial protein-containing complex	GO:CC	0.000787044	Q9CQQ7,Q9CPQ8,Q9CQZ5,Q9DCC8,Q9CPP6,Q921G7,Q8JZQ2,Q91YT0,Q8BMF4,Q99LY9,Q9CQ54,Q8K3J1,Q91WD5,Q9CPQ3,Q78IK2,Q5U458,Q9DCT2,Q9CQ85,P67778,Q9DC69,Q9D051,Q62425,P56382,Q8K1R3,P03930,Q9D880,Q99N92,Q3TBW2,P56135,Q8VCX5,Q7TMF3,Q8BK30,P00158,O35129
3	integral component of membrane	GO:CC	0.00112587	Q8VEM8,P63030,Q9CQZ5,Q9DCC8,Q9CPP6,Q921G7,Q8JZQ2,Q91YT0,Q99LY9,Q9CQ54,Q8K3J1,Q91WD5,Q9CPQ3,Q5U458,Q9DCT2,P67778,Q9DC69,Q62425,P59017,Q8VCX5,Q7TMF3,Q8BK30,P00158,O88741,O35465
3	intrinsic component of membrane	GO:CC	0.0014267	Q8VEM8,P63030,Q9CQZ5,Q9DCC8,Q9CPP6,Q921G7,Q8JZQ2,Q91YT0,Q99LY9,Q9CQ54,Q8K3J1,Q91WD5,Q9CPQ3,Q5U458,Q9DCT2,P67778,Q9DC69,Q62425,P59017,Q8VCX5,Q7TMF3,Q8BK30,P00158,O88741,O35465
3	respiratory chain complex I	GO:CC	0.00143336	Q9CQZ5,Q9CPP6,Q91YT0,Q99LY9,Q9CQ54,Q8K3J1,Q91WD5,Q9DCT2,Q9DC69,Q62425,Q7TMF3,Q8BK30
3	NADH dehydrogenase complex	GO:CC	0.00143336	Q9CQZ5,Q9CPP6,Q91YT0,Q99LY9,Q9CQ54,Q8K3J1,Q91WD5,Q9DCT2,Q9DC69,Q62425,Q7TMF3,Q8BK30
3	mitochondrial respiratory chain complex I	GO:CC	0.00143336	Q9CQZ5,Q9CPP6,Q91YT0,Q99LY9,Q9CQ54,Q8K3J1,Q91WD5,Q9DCT2,Q9DC69,Q62425,Q7TMF3,Q8BK30
3	transmembrane transporter complex	GO:CC	0.00554028	Q9CQZ5,Q9CPP6,Q91YT0,Q99LY9,Q9CQ54,Q8K3J1,Q91WD5,Q9DCT2,Q9DC69,Q62425,Q8VCX5,Q7TMF3,Q8BK30,P00158
3	mitochondrial respirasome	GO:CC	0.00686962	Q9CQT9,Q9CQZ5,Q9CPP6,Q91YT0,Q99LY9,Q9CQ54,Q8K3J1,Q91WD5,Q61387,Q9DCT2,Q9DC69,Q62425,Q7TMF3,Q8BK30,P00158
3	respirasome	GO:CC	0.00954327	Q9CQT9,Q9CQZ5,Q9CPP6,Q91YT0,Q99LY9,Q9CQ54,Q8K3J1,Q91WD5,Q61387,Q9DCT2,Q9DC69,Q62425,Q7TMF3,Q8BK30,P00158
3	protein-containing complex	GO:CC	0.0156444	Q9CQQ7,Q9CPQ8,Q9CQZ5,Q9DCC8,Q9CPP6,Q921G7,Q8JZQ2,Q91YT0,Q8BMF4,Q64521,Q99LY9,Q9CQ54,Q8K3J1,Q91WD5,Q9CPQ3,Q78IK2,Q5U458,Q9DCT2,Q9CQ85,P67778,Q9DC69,Q9D051,Q62425,Q60597,P56382,Q3UHB1,Q8K1R3,P97478,P03930,Q9D880,Q99N92,Q3TBW2,P56135,Q8VCX5,Q7TMF3,Q8BK30,P00158,O35465,O70337,O35129
3	transporter complex	GO:CC	0.018505	Q9CQZ5,Q9CPP6,Q91YT0,Q99LY9,Q9CQ54,Q8K3J1,Q91WD5,Q9DCT2,Q9DC69,Q62425,Q8VCX5,Q7TMF3,Q8BK30,P00158
4	transmembrane transporter complex	GO:CC	1.15696e-06	Q9Z1P6,Q9CQ69,Q9CR61,Q9CR21,Q9D0M3,Q9DB10,Q3UIU2
4	transporter complex	GO:CC	2.40627e-06	Q9Z1P6,Q9CQ69,Q9CR61,Q9CR21,Q9D0M3,Q9DB10,Q3UIU2
4	membrane protein complex	GO:CC	1.63921e-05	Q9Z1P6,Q9CQ69,Q9CR61,Q9CR21,Q9D0M3,Q9DB10,Q9D173,Q3UIU2
4	respiratory chain complex	GO:CC	0.000153377	Q9Z1P6,Q9CQ69,Q9CR61,Q9CR21,Q9D0M3,Q3UIU2
4	inner mitochondrial membrane protein complex	GO:CC	0.000165349	Q9Z1P6,Q9CQ69,Q9CR61,Q9CR21,Q9D0M3,Q9DB10,Q3UIU2
4	mitochondrial respirasome	GO:CC	0.000166247	Q9Z1P6,Q9CQ69,Q9CR61,Q9CR21,Q9D0M3,Q3UIU2
4	respirasome	GO:CC	0.000194673	Q9Z1P6,Q9CQ69,Q9CR61,Q9CR21,Q9D0M3,Q3UIU2
4	oxidoreductase complex	GO:CC	0.000432417	Q9Z1P6,Q9CQ69,Q9CR61,Q9CR21,Q9D0M3,Q3UIU2
4	integral component of membrane	GO:CC	0.000726227	Q9Z1P6,Q9CQ69,Q9CR61,Q9CR21,Q9D0M3,Q9DB10,Q3UIU2
4	intrinsic component of membrane	GO:CC	0.000790764	Q9Z1P6,Q9CQ69,Q9CR61,Q9CR21,Q9D0M3,Q9DB10,Q3UIU2
4	mitochondrial protein-containing complex	GO:CC	0.000798926	Q9Z1P6,Q9CQ69,Q9CR61,Q9CR21,Q9D0M3,Q9DB10,Q9D173,Q3UIU2
4	respiratory chain complex I	GO:CC	0.0102285	Q9Z1P6,Q9CR61,Q9CR21,Q3UIU2
4	NADH dehydrogenase complex	GO:CC	0.0102285	Q9Z1P6,Q9CR61,Q9CR21,Q3UIU2
4	mitochondrial respiratory chain complex I	GO:CC	0.0102285	Q9Z1P6,Q9CR61,Q9CR21,Q3UIU2
4	catalytic complex	GO:CC	0.0120395	Q9Z1P6,Q9CQ69,Q9CR61,Q9CR21,Q9D0M3,Q3UIU2
4	protein-containing complex	GO:CC	0.0159037	Q9Z1P6,Q9CQ69,Q9CR61,Q9CR21,Q9D0M3,Q9DB10,Q9D173,Q3UIU2
8	transmembrane transporter complex	GO:CC	6.42355e-20	Q9Z1P6,Q91VD9,Q9CR61,Q9CR21,Q9D0M3,Q9DCS9,Q9CQZ6,Q9CQ91,Q9CPU2,P03911,Q9DB10,Q9D6J5,Q8K3J1,Q3UIU2,Q9CQH3,Q9DCT2,Q7TMF3,O09111,P52503,P00158
8	transporter complex	GO:CC	6.57358e-19	Q9Z1P6,Q91VD9,Q9CR61,Q9CR21,Q9D0M3,Q9DCS9,Q9CQZ6,Q9CQ91,Q9CPU2,P03911,Q9DB10,Q9D6J5,Q8K3J1,Q3UIU2,Q9CQH3,Q9DCT2,Q7TMF3,O09111,P52503,P00158
8	respiratory chain complex I	GO:CC	4.13176e-18	Q9Z1P6,Q91VD9,Q9CR61,Q9CR21,Q9DCS9,Q9CQZ6,Q9CQ91,Q9CPU2,P03911,Q9D6J5,Q8K3J1,Q3UIU2,Q9CQH3,Q9DCT2,Q7TMF3,O09111,P52503
8	NADH dehydrogenase complex	GO:CC	4.13176e-18	Q9Z1P6,Q91VD9,Q9CR61,Q9CR21,Q9DCS9,Q9CQZ6,Q9CQ91,Q9CPU2,P03911,Q9D6J5,Q8K3J1,Q3UIU2,Q9CQH3,Q9DCT2,Q7TMF3,O09111,P52503
8	mitochondrial respiratory chain complex I	GO:CC	4.13176e-18	Q9Z1P6,Q91VD9,Q9CR61,Q9CR21,Q9DCS9,Q9CQZ6,Q9CQ91,Q9CPU2,P03911,Q9D6J5,Q8K3J1,Q3UIU2,Q9CQH3,Q9DCT2,Q7TMF3,O09111,P52503
8	oxidoreductase complex	GO:CC	5.6274e-17	Q9Z1P6,Q91VD9,Q9CR61,Q9CR21,Q9D0M3,Q9DCS9,Q9CQZ6,Q9CQ91,Q9CPU2,P03911,Q9D6J5,Q9CQX2,Q8K3J1,Q3UIU2,Q9CQH3,Q9DCT2,Q7TMF3,O09111,P52503,P00158
8	respiratory chain complex	GO:CC	7.40191e-17	Q9Z1P6,Q91VD9,Q9CR61,Q9CR21,Q9D0M3,Q9DCS9,Q9CQZ6,Q9CQ91,Q9CPU2,P03911,Q9D6J5,Q8K3J1,Q3UIU2,Q9CQH3,Q9DCT2,Q7TMF3,O09111,P52503,P00158
8	mitochondrial respirasome	GO:CC	9.81441e-17	Q9Z1P6,Q91VD9,Q9CR61,Q9CR21,Q9D0M3,Q9DCS9,Q9CQZ6,Q9CQ91,Q9CPU2,P03911,Q9D6J5,Q8K3J1,Q3UIU2,Q9CQH3,Q9DCT2,Q7TMF3,O09111,P52503,P00158
8	respirasome	GO:CC	1.70344e-16	Q9Z1P6,Q91VD9,Q9CR61,Q9CR21,Q9D0M3,Q9DCS9,Q9CQZ6,Q9CQ91,Q9CPU2,P03911,Q9D6J5,Q8K3J1,Q3UIU2,Q9CQH3,Q9DCT2,Q7TMF3,O09111,P52503,P00158
8	inner mitochondrial membrane protein complex	GO:CC	2.68679e-13	Q9Z1P6,Q91VD9,Q9CR61,Q9CR21,Q9D0M3,Q9DCS9,Q9CQZ6,Q9CQ91,Q9CPU2,P03911,Q9DB10,Q9D6J5,Q8K3J1,Q3UIU2,Q9CQH3,Q9DCT2,Q7TMF3,O09111,P52503,P00158
8	integral component of membrane	GO:CC	7.66165e-13	Q9Z1P6,Q91VD9,Q9CR61,Q9CR21,Q9D0M3,Q9DCS9,Q9CQZ6,Q9CQ91,Q9CPU2,P03911,Q9DB10,Q9D6J5,Q8K3J1,Q3UIU2,Q9CQH3,Q9DCT2,P59017,Q7TMF3,O09111,P52503,P00158
8	intrinsic component of membrane	GO:CC	9.98674e-13	Q9Z1P6,Q91VD9,Q9CR61,Q9CR21,Q9D0M3,Q9DCS9,Q9CQZ6,Q9CQ91,Q9CPU2,P03911,Q9DB10,Q9D6J5,Q8K3J1,Q3UIU2,Q9CQH3,Q9DCT2,P59017,Q7TMF3,O09111,P52503,P00158
8	membrane protein complex	GO:CC	9.98674e-13	Q9Z1P6,Q91VD9,Q9CR61,Q9CR21,Q9D0M3,Q9DCS9,Q9CQZ6,Q9CQ91,Q9CPU2,P03911,Q9DB10,Q9D6J5,Q9D173,Q8K3J1,Q3UIU2,Q9CQH3,Q9DCT2,Q7TMF3,O09111,P52503,P00158
8	catalytic complex	GO:CC	8.59853e-12	Q9Z1P6,Q91VD9,Q9CR61,Q9CR21,Q9D0M3,Q9DCS9,Q9CQZ6,Q9CQ91,Q9CPU2,P03911,Q9D6J5,Q9CQX2,Q8K3J1,Q3UIU2,Q9CQH3,Q9DCT2,Q7TMF3,O09111,P52503,P00158
8	mitochondrial protein-containing complex	GO:CC	2.46514e-08	Q9Z1P6,Q91VD9,Q9CR61,Q9CR21,Q9D0M3,Q9DCS9,Q9CQZ6,Q9CQ91,Q9CPU2,P03911,Q9DB10,Q9D6J5,Q9D173,Q8K3J1,Q3UIU2,Q9CQH3,Q9DCT2,Q7TMF3,O09111,P52503,P00158
8	protein-containing complex	GO:CC	2.47658e-07	Q9Z1P6,Q91VD9,Q9CR61,Q9CR21,Q9D0M3,Q9DCS9,Q9CQZ6,Q9CQ91,Q9CPU2,P03911,Q9DB10,Q9D6J5,Q9D173,Q9CQX2,Q8K3J1,Q3UIU2,Q9CQH3,Q9DCT2,Q7TMF3,Q8C163,O09111,P52503,P00158
8	mitochondrial inner membrane	GO:CC	8.98333e-06	Q9Z1P6,Q91VD9,Q9CR61,Q9CR21,Q9D0M3,Q9DCS9,Q9CQZ6,Q9CQ91,Q9CPU2,P03911,Q9DB10,Q9D6J5,Q9CQX2,Q8K3J1,Q3UIU2,Q9CQH3,Q9DCT2,Q7TMF3,Q8C163,O09111,P52503,P00158
8	organelle inner membrane	GO:CC	9.46531e-06	Q9Z1P6,Q91VD9,Q9CR61,Q9CR21,Q9D0M3,Q9DCS9,Q9CQZ6,Q9CQ91,Q9CPU2,P03911,Q9DB10,Q9D6J5,Q9CQX2,Q8K3J1,Q3UIU2,Q9CQH3,Q9DCT2,Q7TMF3,Q8C163,O09111,P52503,P00158
8	mitochondrial membrane	GO:CC	2.87782e-05	Q9Z1P6,Q91VD9,Q9CR61,Q9CR21,Q9D0M3,Q9DCS9,Q9CQZ6,Q9CQ91,Q9CPU2,P03911,Q9DB10,Q9D6J5,Q9D173,Q9CQX2,Q8K3J1,Q3UIU2,Q9CQH3,Q9DCT2,Q7TMF3,Q8C163,O09111,P52503,P00158
8	membrane	GO:CC	5.7038e-05	Q9Z1P6,Q91VD9,Q9CR61,Q9CR21,Q9D0M3,Q9DCS9,Q9CQZ6,Q9CQ91,Q9CPU2,P03911,Q9DB10,Q9D6J5,Q9D173,Q9CQX2,Q8K3J1,Q3UIU2,Q9CQH3,Q9DCT2,P59017,Q7TMF3,Q8C163,O09111,P52503,P00158
8	organelle membrane	GO:CC	7.13594e-05	Q9Z1P6,Q91VD9,Q9CR61,Q9CR21,Q9D0M3,Q9DCS9,Q9CQZ6,Q9CQ91,Q9CPU2,P03911,Q9DB10,Q9D6J5,Q9D173,Q9CQX2,Q8K3J1,Q3UIU2,Q9CQH3,Q9DCT2,Q7TMF3,Q8C163,O09111,P52503,P00158
8	mitochondrial envelope	GO:CC	0.000184814	Q9Z1P6,Q91VD9,Q9CR61,Q9CR21,Q9D0M3,Q9DCS9,Q9CQZ6,Q9CQ91,Q9CPU2,P03911,Q9DB10,Q9D6J5,Q9D173,Q9CQX2,Q8K3J1,Q3UIU2,Q9CQH3,Q9DCT2,Q7TMF3,Q8C163,O09111,P52503,P00158
8	organelle envelope	GO:CC	0.000247735	Q9Z1P6,Q91VD9,Q9CR61,Q9CR21,Q9D0M3,Q9DCS9,Q9CQZ6,Q9CQ91,Q9CPU2,P03911,Q9DB10,Q9D6J5,Q9D173,Q9CQX2,Q8K3J1,Q3UIU2,Q9CQH3,Q9DCT2,Q7TMF3,Q8C163,O09111,P52503,P00158
8	envelope	GO:CC	0.000247735	Q9Z1P6,Q91VD9,Q9CR61,Q9CR21,Q9D0M3,Q9DCS9,Q9CQZ6,Q9CQ91,Q9CPU2,P03911,Q9DB10,Q9D6J5,Q9D173,Q9CQX2,Q8K3J1,Q3UIU2,Q9CQH3,Q9DCT2,Q7TMF3,Q8C163,O09111,P52503,P00158
9	proton-transporting ATP synthase complex	GO:CC	1.23223e-05	Q91VR2,Q9CQQ7,Q9CPQ8,Q06185
9	proton-transporting two-sector ATPase complex	GO:CC	1.23223e-05	Q91VR2,Q9CQQ7,Q9CPQ8,Q06185
9	mitochondrial proton-transporting ATP synthase complex	GO:CC	1.23223e-05	Q91VR2,Q9CQQ7,Q9CPQ8,Q06185
9	proton-transporting ATP synthase complex, coupling factor F(o)	GO:CC	0.000167455	Q9CQQ7,Q9CPQ8,Q06185
9	proton-transporting two-sector ATPase complex, proton-transporting domain	GO:CC	0.000167455	Q9CQQ7,Q9CPQ8,Q06185
9	mitochondrial proton-transporting ATP synthase complex, coupling factor F(o)	GO:CC	0.000167455	Q9CQQ7,Q9CPQ8,Q06185
9	inner mitochondrial membrane protein complex	GO:CC	0.0281835	Q91VR2,Q9CQQ7,Q9CPQ8,Q06185
21	mitochondrial respiratory chain complex IV	GO:CC	1.82895e-06	P19783,Q9CPQ1,P56393,P12787
21	respiratory chain complex IV	GO:CC	2.89584e-06	P19783,Q9CPQ1,P56393,P12787
21	cytochrome complex	GO:CC	1.63798e-05	P19783,Q9CPQ1,P56393,P12787
21	respiratory chain complex	GO:CC	0.000726469	P19783,Q9CPQ1,P56393,P12787
21	mitochondrial respirasome	GO:CC	0.000766829	P19783,Q9CPQ1,P56393,P12787
21	respirasome	GO:CC	0.000852568	P19783,Q9CPQ1,P56393,P12787
21	inner mitochondrial membrane protein complex	GO:CC	0.00722183	P19783,Q9CPQ1,P56393,P12787
21	catalytic complex	GO:CC	0.0141885	P19783,Q9CPQ1,P56393,P12787
21	membrane protein complex	GO:CC	0.0177951	P19783,Q9CPQ1,P56393,P12787
27	mitochondrial respiratory chain complex IV	GO:CC	2.34052e-08	P19783,Q9CPQ1,P56393,P17665,P43024
27	respiratory chain complex IV	GO:CC	4.23523e-08	P19783,Q9CPQ1,P56393,P17665,P43024
27	cytochrome complex	GO:CC	3.89283e-07	P19783,Q9CPQ1,P56393,P17665,P43024
27	respiratory chain complex	GO:CC	4.71475e-05	P19783,Q9CPQ1,P56393,P17665,P43024
27	mitochondrial respirasome	GO:CC	5.04677e-05	P19783,Q9CPQ1,P56393,P17665,P43024
27	respirasome	GO:CC	5.76691e-05	P19783,Q9CPQ1,P56393,P17665,P43024
27	inner mitochondrial membrane protein complex	GO:CC	0.000844967	P19783,Q9CPQ1,P56393,P17665,P43024
27	catalytic complex	GO:CC	0.00197135	P19783,Q9CPQ1,P56393,P17665,P43024
27	membrane protein complex	GO:CC	0.00261883	P19783,Q9CPQ1,P56393,P17665,P43024
27	mitochondrial protein-containing complex	GO:CC	0.0291904	P19783,Q9CPQ1,P56393,P17665,P43024
28	mitochondrial respiratory chain complex IV	GO:CC	1.46594e-08	Q9CPQ1,P56393,P17665,P43024,P00405,P12787
28	respiratory chain complex IV	GO:CC	3.05107e-08	Q9CPQ1,P56393,P17665,P43024,P00405,P12787
28	cytochrome complex	GO:CC	4.60011e-07	Q9CPQ1,P56393,P17665,P43024,P00405,P12787
28	respiratory chain complex	GO:CC	0.000144973	Q9CPQ1,P56393,P17665,P43024,P00405,P12787
28	mitochondrial respirasome	GO:CC	0.000157138	Q9CPQ1,P56393,P17665,P43024,P00405,P12787
28	respirasome	GO:CC	0.000184006	Q9CPQ1,P56393,P17665,P43024,P00405,P12787
28	catalytic complex	GO:CC	0.000505074	Q9CPQ1,Q6ZQJ5,P56393,P17665,P43024,P00405,P12787
28	inner mitochondrial membrane protein complex	GO:CC	0.00427902	Q9CPQ1,P56393,P17665,P43024,P00405,P12787
28	membrane protein complex	GO:CC	0.0157637	Q9CPQ1,P56393,P17665,P43024,P00405,P12787
28	mitochondrial protein-containing complex	GO:CC	0.0201616	Q9CPQ1,Q6ZQJ5,P56393,P17665,P43024,P00405,P12787
30	mitochondrial respiratory chain complex IV	GO:CC	2.24249e-10	Q9CPQ1,P56393,P17665,P43024,P00405,P12787
30	respiratory chain complex IV	GO:CC	4.68213e-10	Q9CPQ1,P56393,P17665,P43024,P00405,P12787
30	cytochrome complex	GO:CC	7.17268e-09	Q9CPQ1,P56393,P17665,P43024,P00405,P12787
30	respiratory chain complex	GO:CC	2.43238e-06	Q9CPQ1,P56393,P17665,P43024,P00405,P12787
30	mitochondrial respirasome	GO:CC	2.64087e-06	Q9CPQ1,P56393,P17665,P43024,P00405,P12787
30	respirasome	GO:CC	3.10271e-06	Q9CPQ1,P56393,P17665,P43024,P00405,P12787
30	inner mitochondrial membrane protein complex	GO:CC	7.90895e-05	Q9CPQ1,P56393,P17665,P43024,P00405,P12787
30	catalytic complex	GO:CC	0.00021939	Q9CPQ1,P56393,P17665,P43024,P00405,P12787
30	membrane protein complex	GO:CC	0.000308818	Q9CPQ1,P56393,P17665,P43024,P00405,P12787
30	mitochondrial protein-containing complex	GO:CC	0.00561508	Q9CPQ1,P56393,P17665,P43024,P00405,P12787
32	mitochondrial respiratory chain complex IV	GO:CC	0.000690073	Q9CPQ1,P56393,P12787
32	respiratory chain complex IV	GO:CC	0.000962738	Q9CPQ1,P56393,P12787
32	cytochrome complex	GO:CC	0.00340494	Q9CPQ1,P56393,P12787
43	microtubule cytoskeleton	GO:CC	0.000596472	Q8C0T9,P53395,Q80U63,Q9JHW2
43	cytoskeleton	GO:CC	0.00303171	Q8C0T9,P53395,Q80U63,Q9JHW2
44	mitochondrial respiratory chain complex II, succinate dehydrogenase complex (ubiquinone)	GO:CC	0.0245368	Q9CQA3,Q8K2B3
44	succinate dehydrogenase complex (ubiquinone)	GO:CC	0.0245368	Q9CQA3,Q8K2B3
44	respiratory chain complex II	GO:CC	0.0245368	Q9CQA3,Q8K2B3
44	succinate dehydrogenase complex	GO:CC	0.0245368	Q9CQA3,Q8K2B3
44	fumarate reductase complex	GO:CC	0.0245368	Q9CQA3,Q8K2B3
45	proton-transporting ATP synthase complex	GO:CC	3.61979e-06	Q03265,Q9DB20,P03930,P97450
45	proton-transporting two-sector ATPase complex	GO:CC	3.61979e-06	Q03265,Q9DB20,P03930,P97450
45	mitochondrial proton-transporting ATP synthase complex	GO:CC	3.61979e-06	Q03265,Q9DB20,P03930,P97450
45	cell surface	GO:CC	0.000178872	Q03265,Q9DB20,P97450
45	proton-transporting two-sector ATPase complex, catalytic domain	GO:CC	0.00669206	Q03265,Q9DB20
45	proton-transporting ATP synthase complex, catalytic core F(1)	GO:CC	0.00669206	Q03265,Q9DB20
45	inner mitochondrial membrane protein complex	GO:CC	0.00902729	Q03265,Q9DB20,P03930,P97450
45	proton-transporting ATP synthase complex, coupling factor F(o)	GO:CC	0.0199784	Q9DB20,P97450
45	proton-transporting two-sector ATPase complex, proton-transporting domain	GO:CC	0.0199784	Q9DB20,P97450
45	mitochondrial proton-transporting ATP synthase complex, coupling factor F(o)	GO:CC	0.0199784	Q9DB20,P97450
45	membrane protein complex	GO:CC	0.0222438	Q03265,Q9DB20,P03930,P97450
47	transmembrane transporter complex	GO:CC	0.00935902	Q9DB77,Q9CQ75,P52503
47	transporter complex	GO:CC	0.0127206	Q9DB77,Q9CQ75,P52503
47	respiratory chain complex	GO:CC	0.0138105	Q9DB77,Q9CQ75,P52503
47	mitochondrial respirasome	GO:CC	0.014378	Q9DB77,Q9CQ75,P52503
47	respirasome	GO:CC	0.0155594	Q9DB77,Q9CQ75,P52503
47	oxidoreductase complex	GO:CC	0.0232266	Q9DB77,Q9CQ75,P52503
49	mitochondrial prohibitin complex	GO:CC	0.0015276	P67778,O35129
49	presynaptic active zone	GO:CC	0.0015276	P67778,O35129
49	GABA-ergic synapse	GO:CC	0.0015276	P67778,O35129
49	glutamatergic synapse	GO:CC	0.00913216	P67778,O35129
49	postsynaptic specialization	GO:CC	0.0317876	P67778,O35129
49	neuron to neuron synapse	GO:CC	0.0317876	P67778,O35129
49	asymmetric synapse	GO:CC	0.0317876	P67778,O35129
49	postsynaptic density	GO:CC	0.0317876	P67778,O35129
52	membrane	GO:CC	0.0140531	Q9CQA3,Q9CQQ7,Q9DCC8,Q9CPP6,Q8CC21,Q91YT0,Q99LY9,Q91WS0,Q91WC3,Q8K3J1,Q91WD5,Q60931,Q922Q1,Q9DCT2,Q9DC69,Q8JZN5,Q62425,Q4VAE3,P56382,Q8BW75,Q64133,Q9DB41,Q9CZP5,Q8K1R3,P97478,P03930,Q9D880,Q8K1Z0,P59017,Q8VCX5,Q80SW1,Q9D6M3,P19096,P36552,O88741,O35465,O35129,O88587,A2APY7
54	mitochondrial respiratory chain complex IV	GO:CC	2.91149e-05	Q9CPQ1,P17665,P43024,P00405
54	respiratory chain complex IV	GO:CC	4.59625e-05	Q9CPQ1,P17665,P43024,P00405
54	cytochrome complex	GO:CC	0.000256148	Q9CPQ1,P17665,P43024,P00405
54	respiratory chain complex	GO:CC	0.010612	Q9CPQ1,P17665,P43024,P00405
54	mitochondrial respirasome	GO:CC	0.0111843	Q9CPQ1,P17665,P43024,P00405
54	respirasome	GO:CC	0.0123966	Q9CPQ1,P17665,P43024,P00405
57	mitochondrial pyruvate dehydrogenase complex	GO:CC	0.0299686	Q8BMF4,P35486
57	pyruvate dehydrogenase complex	GO:CC	0.0398607	Q8BMF4,P35486
57	MICOS complex	GO:CC	0.0398607	Q8CAQ8,Q9CRB9
65	mitochondrial intermembrane space protein transporter complex	GO:CC	0.0281259	Q9WVA2,P62075
66	dendrite	GO:CC	0.0288071	P58281,P28661,P05132
66	dendritic tree	GO:CC	0.0288071	P58281,P28661,P05132
73	mitochondrial respiratory chain complex I	GO:CC	4.02156e-09	Q9CQZ5,Q9CQJ8,Q9CQC7,Q9CPP6,Q9DCS9,Q9DC70,Q9CQ91,Q9CPU2,Q99LY9,Q8K3J1,Q9CQH3,Q91WD5,Q9DCT2,Q9DC69,Q99LC3,Q62425,Q7TMF3,Q8BK30
73	NADH dehydrogenase complex	GO:CC	4.02156e-09	Q9CQZ5,Q9CQJ8,Q9CQC7,Q9CPP6,Q9DCS9,Q9DC70,Q9CQ91,Q9CPU2,Q99LY9,Q8K3J1,Q9CQH3,Q91WD5,Q9DCT2,Q9DC69,Q99LC3,Q62425,Q7TMF3,Q8BK30
73	respiratory chain complex I	GO:CC	4.02156e-09	Q9CQZ5,Q9CQJ8,Q9CQC7,Q9CPP6,Q9DCS9,Q9DC70,Q9CQ91,Q9CPU2,Q99LY9,Q8K3J1,Q9CQH3,Q91WD5,Q9DCT2,Q9DC69,Q99LC3,Q62425,Q7TMF3,Q8BK30
73	transmembrane transporter complex	GO:CC	1.83832e-08	Q9D0M3,Q9CQZ5,Q9CQJ8,Q9CQC7,Q9CPP6,Q9DCS9,Q9DC70,Q9CQ91,Q9CPU2,Q99LY9,Q8K3J1,Q9CQH3,Q91WD5,Q9DCT2,Q9DC69,Q99LC3,Q62425,Q8VCX5,Q7TMF3,Q8BK30,P00158
73	transporter complex	GO:CC	1.58833e-07	Q9D0M3,Q9CQZ5,Q9CQJ8,Q9CQC7,Q9CPP6,Q9DCS9,Q9DC70,Q9CQ91,Q9CPU2,Q99LY9,Q8K3J1,Q9CQH3,Q91WD5,Q9DCT2,Q9DC69,Q99LC3,Q62425,Q8VCX5,Q7TMF3,Q8BK30,P00158
73	membrane	GO:CC	1.91265e-07	Q9CQQ7,Q9CPQ8,Q99JR1,Q8VEM8,P63030,P50544,Q9D0M3,Q9CQZ5,Q9CQJ8,Q9CQC7,Q9DCC8,Q9D8W7,Q9CPP6,Q921G7,Q8CC21,Q9DCS9,Q9DC70,Q9CQ91,Q9CPU2,Q64521,Q9CQN1,Q99LY9,Q91WS0,Q91WC3,Q8K3J1,Q9CQH3,Q91WD5,Q60931,P58281,Q922Q1,Q791V5,Q64445,Q9DCT2,Q9CQ85,Q60932,P67778,P41216,Q9DC69,Q99LC3,Q8JZN5,Q62425,Q64133,Q9DB41,Q9CZP5,Q8K1R3,P97478,Q9D880,Q99N92,Q8K1Z0,P59017,Q8VCX5,Q7TMF3,Q80SW1,Q3V132,Q9D6M3,Q8BK30,P00158,…
73	mitochondrial envelope	GO:CC	2.03092e-07	Q9CQQ7,Q9CPQ8,Q99JR1,Q8VEM8,P63030,P50544,Q9D0M3,Q9CQZ5,Q9CQJ8,Q9CQC7,Q9DCC8,Q9D8W7,Q9CPP6,Q921G7,Q8CC21,Q9DCS9,Q9DC70,Q9CQ91,Q9CPU2,Q64521,Q9CQN1,Q99LY9,Q91WS0,Q8K3J1,Q9CQH3,Q91WD5,Q60931,P58281,Q922Q1,Q791V5,Q64445,Q9DCT2,Q9CQ85,Q60932,P67778,P41216,Q9DC69,Q99LC3,Q8JZN5,Q62425,Q64133,Q8R086,Q9DB41,Q9CZP5,Q8K1R3,P97478,Q9D880,Q99N92,Q8K1Z0,Q8VCX5,Q7TMF3,Q3V132,Q9D6M3,Q8BK30,P00158,O35465,O70337,…
73	oxidoreductase complex	GO:CC	2.18372e-07	Q9D0M3,Q9CQZ5,Q9CQJ8,Q9CQC7,Q9CPP6,Q921G7,Q9DCS9,Q9DC70,Q9CQ91,Q9CPU2,Q64521,Q99LY9,Q8K3J1,Q9CQH3,Q91WD5,Q9DCT2,Q9DC69,Q99LC3,Q62425,Q7TMF3,Q8BK30,P35487,P00158
73	respiratory chain complex	GO:CC	2.79134e-07	Q9D0M3,Q9CQZ5,Q9CQJ8,Q9CQC7,Q9CPP6,Q9DCS9,Q9DC70,Q9CQ91,Q9CPU2,Q99LY9,Q8K3J1,Q9CQH3,Q91WD5,Q64445,Q9DCT2,Q9DC69,Q99LC3,Q62425,Q7TMF3,Q8BK30,P00158
73	inner mitochondrial membrane protein complex	GO:CC	2.85928e-07	Q9CQQ7,Q9CPQ8,Q9D0M3,Q9CQZ5,Q9CQJ8,Q9CQC7,Q9CPP6,Q9DCS9,Q9DC70,Q9CQ91,Q9CPU2,Q99LY9,Q8K3J1,Q9CQH3,Q91WD5,Q64445,Q9DCT2,Q9CQ85,P67778,Q9DC69,Q99LC3,Q62425,Q9D880,Q8VCX5,Q7TMF3,Q8BK30,P00158,O35129
73	mitochondrial respirasome	GO:CC	3.67166e-07	Q9D0M3,Q9CQZ5,Q9CQJ8,Q9CQC7,Q9CPP6,Q9DCS9,Q9DC70,Q9CQ91,Q9CPU2,Q99LY9,Q8K3J1,Q9CQH3,Q91WD5,Q64445,Q9DCT2,Q9DC69,Q99LC3,Q62425,Q7TMF3,Q8BK30,P00158
73	organelle envelope	GO:CC	3.9843e-07	Q9CQQ7,Q9CPQ8,Q99JR1,Q8VEM8,P63030,P50544,Q9D0M3,Q9CQZ5,Q9CQJ8,Q9CQC7,Q9DCC8,Q9D8W7,Q9CPP6,Q921G7,Q8CC21,Q9DCS9,Q9DC70,Q9CQ91,Q9CPU2,Q64521,Q9CQN1,Q99LY9,Q91WS0,Q8K3J1,Q9CQH3,Q91WD5,Q60931,P58281,Q922Q1,Q791V5,Q64445,Q9DCT2,Q9CQ85,Q60932,P67778,P41216,Q9DC69,Q99LC3,Q8JZN5,Q62425,Q64133,Q8R086,Q9DB41,Q9CZP5,Q8K1R3,P97478,Q9D880,Q99N92,Q8K1Z0,Q8VCX5,Q7TMF3,Q3V132,Q9D6M3,Q8BK30,P00158,O35465,O70337,…
73	envelope	GO:CC	3.9843e-07	Q9CQQ7,Q9CPQ8,Q99JR1,Q8VEM8,P63030,P50544,Q9D0M3,Q9CQZ5,Q9CQJ8,Q9CQC7,Q9DCC8,Q9D8W7,Q9CPP6,Q921G7,Q8CC21,Q9DCS9,Q9DC70,Q9CQ91,Q9CPU2,Q64521,Q9CQN1,Q99LY9,Q91WS0,Q8K3J1,Q9CQH3,Q91WD5,Q60931,P58281,Q922Q1,Q791V5,Q64445,Q9DCT2,Q9CQ85,Q60932,P67778,P41216,Q9DC69,Q99LC3,Q8JZN5,Q62425,Q64133,Q8R086,Q9DB41,Q9CZP5,Q8K1R3,P97478,Q9D880,Q99N92,Q8K1Z0,Q8VCX5,Q7TMF3,Q3V132,Q9D6M3,Q8BK30,P00158,O35465,O70337,…
73	integral component of membrane	GO:CC	4.77713e-07	Q99JR1,Q8VEM8,P63030,Q9D0M3,Q9CQZ5,Q9CQJ8,Q9CQC7,Q9DCC8,Q9CPP6,Q921G7,Q9DCS9,Q9DC70,Q9CQ91,Q9CPU2,Q99LY9,Q8K3J1,Q9CQH3,Q91WD5,Q9DCT2,Q60932,P67778,Q9DC69,Q99LC3,Q62425,P59017,Q8VCX5,Q7TMF3,Q3V132,Q8BK30,P00158,O35465
73	organelle membrane	GO:CC	5.92744e-07	Q9CQQ7,Q9CPQ8,Q99JR1,Q8VEM8,P63030,P50544,Q9D0M3,Q9CQZ5,Q9CQJ8,Q9CQC7,Q9DCC8,Q9D8W7,Q9CPP6,Q921G7,Q8CC21,Q9DCS9,Q9DC70,Q9CQ91,Q9CPU2,Q64521,Q9CQN1,Q99LY9,Q91WS0,Q8K3J1,Q9CQH3,Q91WD5,Q60931,P58281,Q922Q1,Q791V5,Q64445,Q9DCT2,Q9CQ85,Q60932,P67778,P41216,Q9DC69,Q99LC3,Q8JZN5,Q62425,Q64133,Q9DB41,Q9CZP5,Q8K1R3,P97478,Q9D880,Q99N92,Q8K1Z0,Q8VCX5,Q7TMF3,Q3V132,Q9D6M3,Q8BK30,P00158,O35465,O35129,A2APY7
73	respirasome	GO:CC	6.25938e-07	Q9D0M3,Q9CQZ5,Q9CQJ8,Q9CQC7,Q9CPP6,Q9DCS9,Q9DC70,Q9CQ91,Q9CPU2,Q99LY9,Q8K3J1,Q9CQH3,Q91WD5,Q64445,Q9DCT2,Q9DC69,Q99LC3,Q62425,Q7TMF3,Q8BK30,P00158
73	membrane protein complex	GO:CC	6.64292e-07	Q9CQQ7,Q9CPQ8,Q9D0M3,Q9CQZ5,Q9CQJ8,Q9CQC7,Q9DCC8,Q9CPP6,Q9DCS9,Q9DC70,Q9CQ91,Q9CPU2,Q99LY9,Q8K3J1,Q9CQH3,Q91WD5,Q64445,Q9DCT2,Q9CQ85,Q60932,P67778,Q9DC69,Q99LC3,Q62425,Q9D880,Q8VCX5,Q7TMF3,Q3V132,Q8BK30,P00158,O35129
73	intrinsic component of membrane	GO:CC	6.64292e-07	Q99JR1,Q8VEM8,P63030,Q9D0M3,Q9CQZ5,Q9CQJ8,Q9CQC7,Q9DCC8,Q9CPP6,Q921G7,Q9DCS9,Q9DC70,Q9CQ91,Q9CPU2,Q99LY9,Q8K3J1,Q9CQH3,Q91WD5,Q9DCT2,Q60932,P67778,Q9DC69,Q99LC3,Q62425,P59017,Q8VCX5,Q7TMF3,Q3V132,Q8BK30,P00158,O35465
73	mitochondrial inner membrane	GO:CC	1.7925e-06	Q9CQQ7,Q9CPQ8,Q99JR1,Q8VEM8,P63030,P50544,Q9D0M3,Q9CQZ5,Q9CQJ8,Q9CQC7,Q9D8W7,Q9CPP6,Q921G7,Q8CC21,Q9DCS9,Q9DC70,Q9CQ91,Q9CPU2,Q64521,Q9CQN1,Q99LY9,Q8K3J1,Q9CQH3,Q91WD5,Q60931,P58281,Q922Q1,Q791V5,Q64445,Q9DCT2,Q9CQ85,Q60932,P67778,Q9DC69,Q99LC3,Q62425,Q9DB41,Q9CZP5,P97478,Q9D880,Q99N92,Q8K1Z0,Q8VCX5,Q7TMF3,Q3V132,Q9D6M3,Q8BK30,P00158,O35129,A2APY7
73	mitochondrial membrane	GO:CC	1.839e-06	Q9CQQ7,Q9CPQ8,Q99JR1,Q8VEM8,P63030,P50544,Q9D0M3,Q9CQZ5,Q9CQJ8,Q9CQC7,Q9DCC8,Q9D8W7,Q9CPP6,Q921G7,Q8CC21,Q9DCS9,Q9DC70,Q9CQ91,Q9CPU2,Q64521,Q9CQN1,Q99LY9,Q91WS0,Q8K3J1,Q9CQH3,Q91WD5,Q60931,P58281,Q922Q1,Q791V5,Q64445,Q9DCT2,Q9CQ85,Q60932,P67778,P41216,Q9DC69,Q99LC3,Q8JZN5,Q62425,Q64133,Q9DB41,Q9CZP5,P97478,Q9D880,Q99N92,Q8K1Z0,Q8VCX5,Q7TMF3,Q3V132,Q9D6M3,Q8BK30,P00158,O35129,A2APY7
73	organelle inner membrane	GO:CC	1.98207e-06	Q9CQQ7,Q9CPQ8,Q99JR1,Q8VEM8,P63030,P50544,Q9D0M3,Q9CQZ5,Q9CQJ8,Q9CQC7,Q9D8W7,Q9CPP6,Q921G7,Q8CC21,Q9DCS9,Q9DC70,Q9CQ91,Q9CPU2,Q64521,Q9CQN1,Q99LY9,Q8K3J1,Q9CQH3,Q91WD5,Q60931,P58281,Q922Q1,Q791V5,Q64445,Q9DCT2,Q9CQ85,Q60932,P67778,Q9DC69,Q99LC3,Q62425,Q9DB41,Q9CZP5,P97478,Q9D880,Q99N92,Q8K1Z0,Q8VCX5,Q7TMF3,Q3V132,Q9D6M3,Q8BK30,P00158,O35129,A2APY7
73	catalytic complex	GO:CC	0.00111624	Q9D0M3,Q9CQZ5,Q9CQJ8,Q9CQC7,Q9CPP6,Q921G7,Q9DCS9,Q9DC70,Q9CQ91,Q9CPU2,Q64521,Q99LY9,Q8K3J1,Q9CQH3,Q91WD5,Q64445,Q9DCT2,Q9DC69,Q99LC3,Q62425,Q8K1R3,Q7TMF3,Q8BK30,P35487,P00158
73	mitochondrial protein-containing complex	GO:CC	0.00248386	Q9CQQ7,Q9CPQ8,Q9D0M3,Q9CQZ5,Q9CQJ8,Q9CQC7,Q9DCC8,Q9CPP6,Q921G7,Q9DCS9,Q9DC70,Q9CQ91,Q9CPU2,Q99LY9,Q8K3J1,Q9CQH3,Q91WD5,Q64445,Q9DCT2,Q9CQ85,Q60932,P67778,Q9DC69,Q99LC3,Q62425,Q8K1R3,Q9D880,Q99N92,Q8VCX5,Q7TMF3,Q3V132,Q8BK30,P00158,O35129
73	protein-containing complex	GO:CC	0.0210149	Q9CQQ7,Q9CPQ8,Q9D0M3,Q9CQZ5,Q9CQJ8,Q9CQC7,Q9DCC8,Q9CPP6,Q921G7,Q9DCS9,Q9DC70,Q9CQ91,Q9CPU2,Q64521,Q99LY9,Q8K3J1,Q9CQH3,Q91WD5,Q64445,Q9DCT2,Q9CQ85,Q60932,P67778,Q9DC69,Q99LC3,Q62425,Q3UHB1,Q8K1R3,P97478,Q9D880,Q99N92,Q8K1Z0,Q8VCX5,Q7TMF3,Q3V132,Q8BK30,P35487,P00158,O35465,O70337,O35129
82	inner mitochondrial membrane protein complex	GO:CC	9.33614e-13	P99028,Q9CQV7,Q9CPQ8,Q9CQJ8,Q9CQ75,Q9CPP6,Q8JZQ2,Q9CQ91,Q9CPU2,Q99LY9,Q9DB10,Q9D6J5,Q9CQ54,Q8K3J1,Q3UIU2,Q9CQH3,Q91WD5,Q64445,Q5U458,P48771,Q9DCT2,Q9CQ85,P67778,Q99LC3,Q62425,P56135,Q8BK30,P52503,P00158,O35129
82	membrane protein complex	GO:CC	9.45721e-12	P99028,Q9CQV7,Q9CPQ8,Q9CQJ8,Q9DCC8,Q9CQ75,Q9CPP6,Q8JZQ2,Q9CQ91,Q9CPU2,Q99LY9,Q9DB10,Q9D6J5,Q9D173,Q9CQ54,Q8K3J1,Q3UIU2,Q9CQH3,Q91WD5,Q64445,Q5U458,P48771,Q9DCT2,Q9CQ85,P67778,Q99LC3,Q62425,P56135,Q8BK30,P52503,P00158,O35129
82	respiratory chain complex I	GO:CC	3.67279e-10	Q9CQJ8,Q9CQ75,Q9CPP6,Q9CQ91,Q9CPU2,Q99LY9,Q9D6J5,Q9CQ54,Q8K3J1,Q3UIU2,Q9CQH3,Q91WD5,Q9DCT2,Q99LC3,Q62425,Q8BK30,P52503
82	NADH dehydrogenase complex	GO:CC	3.67279e-10	Q9CQJ8,Q9CQ75,Q9CPP6,Q9CQ91,Q9CPU2,Q99LY9,Q9D6J5,Q9CQ54,Q8K3J1,Q3UIU2,Q9CQH3,Q91WD5,Q9DCT2,Q99LC3,Q62425,Q8BK30,P52503
82	mitochondrial respiratory chain complex I	GO:CC	3.67279e-10	Q9CQJ8,Q9CQ75,Q9CPP6,Q9CQ91,Q9CPU2,Q99LY9,Q9D6J5,Q9CQ54,Q8K3J1,Q3UIU2,Q9CQH3,Q91WD5,Q9DCT2,Q99LC3,Q62425,Q8BK30,P52503
82	integral component of membrane	GO:CC	4.74261e-10	P99028,Q99JR1,Q91V61,Q9CQJ8,Q9DCC8,Q9CQ75,Q9CPP6,Q921G7,Q8JZQ2,Q9CQ91,Q9CPU2,Q99LY9,Q9DB10,Q9D6J5,Q9CQ54,Q8K3J1,Q3UIU2,Q9CQH3,Q91WD5,Q5U458,Q9DCT2,P67778,Q9D2R6,Q99LC3,Q62425,P59017,Q8BK30,P52503,P00158,O35465
82	transmembrane transporter complex	GO:CC	5.36015e-10	P99028,Q9CQJ8,Q9CQ75,Q9CPP6,Q9CQ91,Q9CPU2,Q99LY9,Q9DB10,Q9D6J5,Q9CQ54,Q8K3J1,Q3UIU2,Q9CQH3,Q91WD5,Q9DCT2,Q99LC3,Q62425,Q8BK30,P52503,P00158
82	intrinsic component of membrane	GO:CC	6.72083e-10	P99028,Q99JR1,Q91V61,Q9CQJ8,Q9DCC8,Q9CQ75,Q9CPP6,Q921G7,Q8JZQ2,Q9CQ91,Q9CPU2,Q99LY9,Q9DB10,Q9D6J5,Q9CQ54,Q8K3J1,Q3UIU2,Q9CQH3,Q91WD5,Q5U458,Q9DCT2,P67778,Q9D2R6,Q99LC3,Q62425,P59017,Q8BK30,P52503,P00158,O35465
82	respiratory chain complex	GO:CC	7.39246e-10	P99028,Q9CQJ8,Q9CQ75,Q9CPP6,Q9CQ91,Q9CPU2,Q99LY9,Q9D6J5,Q9CQ54,Q8K3J1,Q3UIU2,Q9CQH3,Q91WD5,Q64445,P48771,Q9DCT2,Q99LC3,Q62425,Q8BK30,P52503,P00158
82	mitochondrial respirasome	GO:CC	9.88362e-10	P99028,Q9CQJ8,Q9CQ75,Q9CPP6,Q9CQ91,Q9CPU2,Q99LY9,Q9D6J5,Q9CQ54,Q8K3J1,Q3UIU2,Q9CQH3,Q91WD5,Q64445,P48771,Q9DCT2,Q99LC3,Q62425,Q8BK30,P52503,P00158
82	respirasome	GO:CC	1.74082e-09	P99028,Q9CQJ8,Q9CQ75,Q9CPP6,Q9CQ91,Q9CPU2,Q99LY9,Q9D6J5,Q9CQ54,Q8K3J1,Q3UIU2,Q9CQH3,Q91WD5,Q64445,P48771,Q9DCT2,Q99LC3,Q62425,Q8BK30,P52503,P00158
82	oxidoreductase complex	GO:CC	3.16031e-09	P99028,Q9CQJ8,Q9CQ75,Q9CPP6,Q921G7,Q9CQ91,Q9CPU2,Q64521,Q99LY9,Q9D6J5,Q9CQ54,Q8K3J1,Q3UIU2,Q9CQH3,Q91WD5,Q9DCT2,Q99LC3,Q62425,Q8BK30,P52503,P35487,P00158
82	transporter complex	GO:CC	4.47637e-09	P99028,Q9CQJ8,Q9CQ75,Q9CPP6,Q9CQ91,Q9CPU2,Q99LY9,Q9DB10,Q9D6J5,Q9CQ54,Q8K3J1,Q3UIU2,Q9CQH3,Q91WD5,Q9DCT2,Q99LC3,Q62425,Q8BK30,P52503,P00158
82	membrane	GO:CC	3.53538e-07	P99028,Q9CQV7,Q9CPQ8,Q99JR1,Q91V61,Q8BH59,P50544,Q9CQJ8,Q9DCC8,Q9D8W7,Q9CQ75,Q9CPP6,Q921G7,Q8JZQ2,Q9CQ91,Q9CPU2,Q64521,Q99LY9,Q91WC3,Q9DB10,Q9D6J5,Q9D173,Q9CQ54,Q8K3J1,Q791T5,Q3UIU2,Q9CQH3,Q91WD5,Q64445,Q5U458,P48771,Q9DCT2,Q9CQ85,P67778,P41216,Q64373,Q9D2R6,Q99LC3,Q62425,Q9DB41,P97478,P59017,P56135,Q9D6M3,Q8BK30,P52503,P00158,O35465,O35129
82	organelle membrane	GO:CC	1.05991e-06	P99028,Q9CQV7,Q9CPQ8,Q99JR1,Q91V61,Q8BH59,P50544,Q9CQJ8,Q9DCC8,Q9D8W7,Q9CQ75,Q9CPP6,Q921G7,Q8JZQ2,Q9CQ91,Q9CPU2,Q64521,Q99LY9,Q9DB10,Q9D6J5,Q9D173,Q9CQ54,Q8K3J1,Q3UIU2,Q9CQH3,Q91WD5,Q64445,Q5U458,P48771,Q9DCT2,Q9CQ85,P67778,P41216,Q64373,Q9D2R6,Q99LC3,Q62425,Q9DB41,P97478,P56135,Q9D6M3,Q8BK30,P52503,P00158,O35465,O35129
82	mitochondrial membrane	GO:CC	1.20944e-06	P99028,Q9CQV7,Q9CPQ8,Q99JR1,Q91V61,Q8BH59,P50544,Q9CQJ8,Q9DCC8,Q9D8W7,Q9CQ75,Q9CPP6,Q921G7,Q8JZQ2,Q9CQ91,Q9CPU2,Q64521,Q99LY9,Q9DB10,Q9D6J5,Q9D173,Q9CQ54,Q8K3J1,Q3UIU2,Q9CQH3,Q91WD5,Q64445,Q5U458,P48771,Q9DCT2,Q9CQ85,P67778,P41216,Q64373,Q9D2R6,Q99LC3,Q62425,Q9DB41,P97478,P56135,Q9D6M3,Q8BK30,P52503,P00158,O35129
82	mitochondrial inner membrane	GO:CC	1.86356e-06	P99028,Q9CQV7,Q9CPQ8,Q99JR1,Q91V61,Q8BH59,P50544,Q9CQJ8,Q9D8W7,Q9CQ75,Q9CPP6,Q921G7,Q8JZQ2,Q9CQ91,Q9CPU2,Q64521,Q99LY9,Q9DB10,Q9D6J5,Q9CQ54,Q8K3J1,Q3UIU2,Q9CQH3,Q91WD5,Q64445,Q5U458,P48771,Q9DCT2,Q9CQ85,P67778,Q9D2R6,Q99LC3,Q62425,Q9DB41,P97478,P56135,Q9D6M3,Q8BK30,P52503,P00158,O35129
82	organelle inner membrane	GO:CC	2.03246e-06	P99028,Q9CQV7,Q9CPQ8,Q99JR1,Q91V61,Q8BH59,P50544,Q9CQJ8,Q9D8W7,Q9CQ75,Q9CPP6,Q921G7,Q8JZQ2,Q9CQ91,Q9CPU2,Q64521,Q99LY9,Q9DB10,Q9D6J5,Q9CQ54,Q8K3J1,Q3UIU2,Q9CQH3,Q91WD5,Q64445,Q5U458,P48771,Q9DCT2,Q9CQ85,P67778,Q9D2R6,Q99LC3,Q62425,Q9DB41,P97478,P56135,Q9D6M3,Q8BK30,P52503,P00158,O35129
82	mitochondrial protein-containing complex	GO:CC	2.10352e-06	P99028,Q9CQV7,Q9CPQ8,Q9CQJ8,Q9DCC8,Q9CQ75,Q9CPP6,Q921G7,Q8JZQ2,Q9CQ91,Q9CPU2,Q99LY9,Q9DB10,Q9D6J5,Q9D173,Q9CQ54,Q8K3J1,Q3UIU2,Q9CQH3,Q91WD5,Q64445,Q5U458,P48771,Q9DCT2,Q9CQ85,P67778,Q99LC3,Q62425,P56135,Q8BK30,P52503,P00158,O35129
82	catalytic complex	GO:CC	2.13609e-06	P99028,Q9CQJ8,Q9CQ75,Q9CPP6,Q921G7,Q8JZQ2,Q9CQ91,Q9CPU2,Q64521,Q99LY9,Q9D6J5,Q9CQ54,Q8K3J1,Q3UIU2,Q9CQH3,Q91WD5,Q64445,P48771,Q9DCT2,Q99LC3,Q62425,Q8BK30,P52503,P35487,P00158
82	mitochondrial envelope	GO:CC	5.99013e-06	P99028,Q9CQV7,Q9CPQ8,Q99JR1,Q91V61,Q8BH59,P50544,Q9CQJ8,Q9DCC8,Q9D8W7,Q9CQ75,Q9CPP6,Q921G7,Q8JZQ2,Q9CQ91,Q9CPU2,Q64521,Q99LY9,Q9DB10,Q9D6J5,Q9D173,Q9CQ54,Q8K3J1,Q3UIU2,Q9CQH3,Q91WD5,Q64445,Q5U458,P48771,Q9DCT2,Q9CQ85,P67778,P41216,Q64373,Q9D2R6,Q99LC3,Q62425,Q9DB41,P97478,P56135,Q9D6M3,Q8BK30,P52503,P00158,O35465,O35129
82	organelle envelope	GO:CC	1.01657e-05	P99028,Q9CQV7,Q9CPQ8,Q99JR1,Q91V61,Q8BH59,P50544,Q9CQJ8,Q9DCC8,Q9D8W7,Q9CQ75,Q9CPP6,Q921G7,Q8JZQ2,Q9CQ91,Q9CPU2,Q64521,Q99LY9,Q9DB10,Q9D6J5,Q9D173,Q9CQ54,Q8K3J1,Q3UIU2,Q9CQH3,Q91WD5,Q64445,Q5U458,P48771,Q9DCT2,Q9CQ85,P67778,P41216,Q64373,Q9D2R6,Q99LC3,Q62425,Q9DB41,P97478,P56135,Q9D6M3,Q8BK30,P52503,P00158,O35465,O35129
82	envelope	GO:CC	1.01657e-05	P99028,Q9CQV7,Q9CPQ8,Q99JR1,Q91V61,Q8BH59,P50544,Q9CQJ8,Q9DCC8,Q9D8W7,Q9CQ75,Q9CPP6,Q921G7,Q8JZQ2,Q9CQ91,Q9CPU2,Q64521,Q99LY9,Q9DB10,Q9D6J5,Q9D173,Q9CQ54,Q8K3J1,Q3UIU2,Q9CQH3,Q91WD5,Q64445,Q5U458,P48771,Q9DCT2,Q9CQ85,P67778,P41216,Q64373,Q9D2R6,Q99LC3,Q62425,Q9DB41,P97478,P56135,Q9D6M3,Q8BK30,P52503,P00158,O35465,O35129
82	protein-containing complex	GO:CC	5.07652e-05	P99028,Q9CQV7,Q9CPQ8,Q9CQJ8,Q9DCC8,Q9CQ75,Q9CPP6,Q921G7,Q8JZQ2,Q9CQ91,Q9CPU2,Q64521,Q99LY9,Q9DB10,Q9D6J5,Q9D173,Q9CQ54,Q8K3J1,Q3UIU2,Q9CQH3,Q91WD5,Q64445,Q5U458,P48771,Q9DCT2,Q9CQ85,P67778,Q64373,Q99LC3,Q62425,P97478,P56135,Q8BK30,P52503,P35487,P00158,O35465,O35129
83	respiratory chain complex I	GO:CC	4.24942e-09	Q9CQJ8,Q9CPP6,Q9CQZ6,Q9CQ91,Q9CPU2,Q99LY9,Q9CQ54,Q8K3J1,Q9CQH3,Q91WD5,Q9DCT2,Q99LC3
83	NADH dehydrogenase complex	GO:CC	4.24942e-09	Q9CQJ8,Q9CPP6,Q9CQZ6,Q9CQ91,Q9CPU2,Q99LY9,Q9CQ54,Q8K3J1,Q9CQH3,Q91WD5,Q9DCT2,Q99LC3
83	mitochondrial respiratory chain complex I	GO:CC	4.24942e-09	Q9CQJ8,Q9CPP6,Q9CQZ6,Q9CQ91,Q9CPU2,Q99LY9,Q9CQ54,Q8K3J1,Q9CQH3,Q91WD5,Q9DCT2,Q99LC3
83	oxidoreductase complex	GO:CC	1.73873e-07	Q9CQJ8,Q9CPP6,Q921G7,Q9CQZ6,Q9CQ91,Q9CPU2,Q64521,Q99LY9,Q9CQ54,Q8K3J1,Q9CQH3,Q91WD5,Q9DCT2,Q99LC3
83	inner mitochondrial membrane protein complex	GO:CC	3.52484e-07	Q9CQV7,Q9CQJ8,Q9CPP6,Q9CQZ6,Q9CQ91,Q9CPU2,Q99LY9,Q9CQ54,Q8K3J1,Q9CQH3,Q91WD5,Q5U458,Q9DCT2,Q99LC3,P56135,O35129
83	transmembrane transporter complex	GO:CC	7.40743e-07	Q9CQJ8,Q9CPP6,Q9CQZ6,Q9CQ91,Q9CPU2,Q99LY9,Q9CQ54,Q8K3J1,Q9CQH3,Q91WD5,Q9DCT2,Q99LC3
83	integral component of membrane	GO:CC	8.98392e-07	Q99JR1,Q9CQJ8,Q9CPP6,Q921G7,Q9CQZ6,Q9CQ91,Q9CPU2,Q99LY9,Q9CQ54,Q8K3J1,Q9CQH3,Q91WD5,Q5U458,Q9DCT2,Q9D2R6,Q99LC3,O88741
83	intrinsic component of membrane	GO:CC	1.09525e-06	Q99JR1,Q9CQJ8,Q9CPP6,Q921G7,Q9CQZ6,Q9CQ91,Q9CPU2,Q99LY9,Q9CQ54,Q8K3J1,Q9CQH3,Q91WD5,Q5U458,Q9DCT2,Q9D2R6,Q99LC3,O88741
83	mitochondrial inner membrane	GO:CC	1.82811e-06	Q9CQV7,Q99JR1,Q8BH59,P50544,Q9CQJ8,Q9D8W7,Q9CPP6,Q921G7,Q9CQZ6,Q9CQ91,Q9CPU2,Q64521,Q99LY9,Q9CQ54,Q8K3J1,Q9CQH3,Q91WD5,Q5U458,Q9DCT2,Q9D2R6,Q99LC3,Q9DB41,P56135,O35129
83	organelle inner membrane	GO:CC	1.93633e-06	Q9CQV7,Q99JR1,Q8BH59,P50544,Q9CQJ8,Q9D8W7,Q9CPP6,Q921G7,Q9CQZ6,Q9CQ91,Q9CPU2,Q64521,Q99LY9,Q9CQ54,Q8K3J1,Q9CQH3,Q91WD5,Q5U458,Q9DCT2,Q9D2R6,Q99LC3,Q9DB41,P56135,O35129
83	transporter complex	GO:CC	2.51833e-06	Q9CQJ8,Q9CPP6,Q9CQZ6,Q9CQ91,Q9CPU2,Q99LY9,Q9CQ54,Q8K3J1,Q9CQH3,Q91WD5,Q9DCT2,Q99LC3
83	respiratory chain complex	GO:CC	3.48314e-06	Q9CQJ8,Q9CPP6,Q9CQZ6,Q9CQ91,Q9CPU2,Q99LY9,Q9CQ54,Q8K3J1,Q9CQH3,Q91WD5,Q9DCT2,Q99LC3
83	mitochondrial respirasome	GO:CC	4.08081e-06	Q9CQJ8,Q9CPP6,Q9CQZ6,Q9CQ91,Q9CPU2,Q99LY9,Q9CQ54,Q8K3J1,Q9CQH3,Q91WD5,Q9DCT2,Q99LC3
83	respirasome	GO:CC	5.56087e-06	Q9CQJ8,Q9CPP6,Q9CQZ6,Q9CQ91,Q9CPU2,Q99LY9,Q9CQ54,Q8K3J1,Q9CQH3,Q91WD5,Q9DCT2,Q99LC3
83	mitochondrial membrane	GO:CC	7.71003e-06	Q9CQV7,Q99JR1,Q8BH59,P50544,Q9CQJ8,Q9D8W7,Q9CPP6,Q921G7,Q9CQZ6,Q9CQ91,Q9CPU2,Q64521,Q99LY9,Q9CQ54,Q8K3J1,Q9CQH3,Q91WD5,Q5U458,Q9DCT2,Q9D2R6,Q99LC3,Q9DB41,P56135,O88741,O35129
83	membrane protein complex	GO:CC	1.06611e-05	Q9CQV7,Q9CQJ8,Q9CPP6,Q9CQZ6,Q9CQ91,Q9CPU2,Q99LY9,Q9CQ54,Q8K3J1,Q9CQH3,Q91WD5,Q5U458,Q9DCT2,Q99LC3,P56135,O35129
83	organelle membrane	GO:CC	2.08376e-05	Q9CQV7,Q99JR1,Q8BH59,P50544,Q9CQJ8,Q9D8W7,Q9CPP6,Q921G7,Q9CQZ6,Q9CQ91,Q9CPU2,Q64521,Q99LY9,Q9CQ54,Q8K3J1,Q9CQH3,Q91WD5,Q5U458,Q9DCT2,Q9D2R6,Q99LC3,Q9DB41,P56135,O88741,O35129
83	mitochondrial envelope	GO:CC	5.90839e-05	Q9CQV7,Q99JR1,Q8BH59,P50544,Q9CQJ8,Q9D8W7,Q9CPP6,Q921G7,Q9CQZ6,Q9CQ91,Q9CPU2,Q64521,Q99LY9,Q9CQ54,Q8K3J1,Q9CQH3,Q91WD5,Q5U458,Q9DCT2,Q9D2R6,Q99LC3,Q9DB41,P56135,O88741,O35129
83	envelope	GO:CC	8.14457e-05	Q9CQV7,Q99JR1,Q8BH59,P50544,Q9CQJ8,Q9D8W7,Q9CPP6,Q921G7,Q9CQZ6,Q9CQ91,Q9CPU2,Q64521,Q99LY9,Q9CQ54,Q8K3J1,Q9CQH3,Q91WD5,Q5U458,Q9DCT2,Q9D2R6,Q99LC3,Q9DB41,P56135,O88741,O35129
83	organelle envelope	GO:CC	8.14457e-05	Q9CQV7,Q99JR1,Q8BH59,P50544,Q9CQJ8,Q9D8W7,Q9CPP6,Q921G7,Q9CQZ6,Q9CQ91,Q9CPU2,Q64521,Q99LY9,Q9CQ54,Q8K3J1,Q9CQH3,Q91WD5,Q5U458,Q9DCT2,Q9D2R6,Q99LC3,Q9DB41,P56135,O88741,O35129
83	membrane	GO:CC	0.000268539	Q9CQV7,Q99JR1,Q8BH59,P50544,Q9CQJ8,Q9D8W7,Q9CPP6,Q921G7,Q9CQZ6,Q9CQ91,Q9CPU2,Q64521,Q99LY9,Q9CQ54,Q8K3J1,Q9CQH3,Q91WD5,Q5U458,Q9DCT2,Q9D2R6,Q99LC3,Q9DB41,P56135,O88741,O35129
83	catalytic complex	GO:CC	0.000316889	Q9CQJ8,Q9CPP6,Q921G7,Q9CQZ6,Q9CQ91,Q9CPU2,Q64521,Q99LY9,Q9CQ54,Q8K3J1,Q9CQH3,Q91WD5,Q9DCT2,Q99LC3
83	mitochondrial protein-containing complex	GO:CC	0.00176386	Q9CQV7,Q9CQJ8,Q9CPP6,Q921G7,Q9CQZ6,Q9CQ91,Q9CPU2,Q99LY9,Q9CQ54,Q8K3J1,Q9CQH3,Q91WD5,Q5U458,Q9DCT2,Q99LC3,P56135,O35129
86	inner mitochondrial membrane protein complex	GO:CC	3.88486e-07	Q9CQV7,Q9CPQ8,Q9CQ91,Q9CPU2,Q99LY9,Q9CQ54,Q8K3J1,Q9CQH3,Q91WD5,Q9DCT2,Q9CQ85,Q99LC3,P56135,Q7TMF3,O35129
86	respiratory chain complex I	GO:CC	4.91448e-07	Q9CQ91,Q9CPU2,Q99LY9,Q9CQ54,Q8K3J1,Q9CQH3,Q91WD5,Q9DCT2,Q99LC3,Q7TMF3
86	NADH dehydrogenase complex	GO:CC	4.91448e-07	Q9CQ91,Q9CPU2,Q99LY9,Q9CQ54,Q8K3J1,Q9CQH3,Q91WD5,Q9DCT2,Q99LC3,Q7TMF3
86	mitochondrial respiratory chain complex I	GO:CC	4.91448e-07	Q9CQ91,Q9CPU2,Q99LY9,Q9CQ54,Q8K3J1,Q9CQH3,Q91WD5,Q9DCT2,Q99LC3,Q7TMF3
86	oxidoreductase complex	GO:CC	4.80591e-06	Q921G7,Q9CQ91,Q9CPU2,Q64521,Q99LY9,Q9CQ54,Q8K3J1,Q9CQH3,Q91WD5,Q9DCT2,Q99LC3,Q7TMF3
86	membrane protein complex	GO:CC	9.79301e-06	Q9CQV7,Q9CPQ8,Q9CQ91,Q9CPU2,Q99LY9,Q9CQ54,Q8K3J1,Q9CQH3,Q91WD5,Q9DCT2,Q9CQ85,Q99LC3,P56135,Q7TMF3,O35129
86	mitochondrial respirasome	GO:CC	1.04966e-05	Q9CQ91,Q9CPU2,Q99LY9,Q9CQ54,Q8K3J1,Q9CQH3,Q91WD5,Q61387,Q9DCT2,Q99LC3,Q7TMF3
86	respirasome	GO:CC	1.39294e-05	Q9CQ91,Q9CPU2,Q99LY9,Q9CQ54,Q8K3J1,Q9CQH3,Q91WD5,Q61387,Q9DCT2,Q99LC3,Q7TMF3
86	mitochondrial inner membrane	GO:CC	2.78895e-05	Q9CQV7,Q9CPQ8,Q91V61,Q8BH59,P50544,Q921G7,Q9CQ91,Q9CPU2,Q64521,Q99LY9,Q9CQ54,Q8K3J1,Q9CQH3,Q91WD5,Q61387,Q9DCT2,Q9CQ85,Q99LC3,P56135,Q7TMF3,O35129
86	organelle inner membrane	GO:CC	2.93091e-05	Q9CQV7,Q9CPQ8,Q91V61,Q8BH59,P50544,Q921G7,Q9CQ91,Q9CPU2,Q64521,Q99LY9,Q9CQ54,Q8K3J1,Q9CQH3,Q91WD5,Q61387,Q9DCT2,Q9CQ85,Q99LC3,P56135,Q7TMF3,O35129
86	transmembrane transporter complex	GO:CC	3.19735e-05	Q9CQ91,Q9CPU2,Q99LY9,Q9CQ54,Q8K3J1,Q9CQH3,Q91WD5,Q9DCT2,Q99LC3,Q7TMF3
86	mitochondrial membrane	GO:CC	7.81248e-05	Q9CQV7,Q9CPQ8,Q91V61,Q8BH59,P50544,Q921G7,Q9CQ91,Q9CPU2,Q64521,Q99LY9,Q9CQ54,Q8K3J1,Q9CQH3,Q91WD5,Q61387,Q9DCT2,Q9CQ85,Q99LC3,P56135,Q7TMF3,O88741,O35129
86	integral component of membrane	GO:CC	7.82117e-05	Q91V61,Q921G7,Q9CQ91,Q9CPU2,Q99LY9,Q9CQ54,Q8K3J1,Q9CQH3,Q91WD5,Q9DCT2,Q99LC3,P59017,Q7TMF3,O88741
86	transporter complex	GO:CC	8.63907e-05	Q9CQ91,Q9CPU2,Q99LY9,Q9CQ54,Q8K3J1,Q9CQH3,Q91WD5,Q9DCT2,Q99LC3,Q7TMF3
86	intrinsic component of membrane	GO:CC	9.16155e-05	Q91V61,Q921G7,Q9CQ91,Q9CPU2,Q99LY9,Q9CQ54,Q8K3J1,Q9CQH3,Q91WD5,Q9DCT2,Q99LC3,P59017,Q7TMF3,O88741
86	respiratory chain complex	GO:CC	0.000112446	Q9CQ91,Q9CPU2,Q99LY9,Q9CQ54,Q8K3J1,Q9CQH3,Q91WD5,Q9DCT2,Q99LC3,Q7TMF3
86	membrane	GO:CC	0.000138508	Q9CQV7,Q9CPQ8,Q91V61,Q8BH59,P50544,Q921G7,Q9CQ91,Q9CPU2,Q64521,Q99LY9,Q9CQ54,Q8K3J1,Q9CQH3,Q91WD5,Q61387,Q9DCT2,Q9CQ85,Q99LC3,P59017,P56135,Q7TMF3,O88741,O35129
86	organelle membrane	GO:CC	0.000185586	Q9CQV7,Q9CPQ8,Q91V61,Q8BH59,P50544,Q921G7,Q9CQ91,Q9CPU2,Q64521,Q99LY9,Q9CQ54,Q8K3J1,Q9CQH3,Q91WD5,Q61387,Q9DCT2,Q9CQ85,Q99LC3,P56135,Q7TMF3,O88741,O35129
86	mitochondrial envelope	GO:CC	0.000459444	Q9CQV7,Q9CPQ8,Q91V61,Q8BH59,P50544,Q921G7,Q9CQ91,Q9CPU2,Q64521,Q99LY9,Q9CQ54,Q8K3J1,Q9CQH3,Q91WD5,Q61387,Q9DCT2,Q9CQ85,Q99LC3,P56135,Q7TMF3,O88741,O35129
86	envelope	GO:CC	0.000607345	Q9CQV7,Q9CPQ8,Q91V61,Q8BH59,P50544,Q921G7,Q9CQ91,Q9CPU2,Q64521,Q99LY9,Q9CQ54,Q8K3J1,Q9CQH3,Q91WD5,Q61387,Q9DCT2,Q9CQ85,Q99LC3,P56135,Q7TMF3,O88741,O35129
86	organelle envelope	GO:CC	0.000607345	Q9CQV7,Q9CPQ8,Q91V61,Q8BH59,P50544,Q921G7,Q9CQ91,Q9CPU2,Q64521,Q99LY9,Q9CQ54,Q8K3J1,Q9CQH3,Q91WD5,Q61387,Q9DCT2,Q9CQ85,Q99LC3,P56135,Q7TMF3,O88741,O35129
86	mitochondrial protein-containing complex	GO:CC	0.00104736	Q9CQV7,Q9CPQ8,Q921G7,Q9CQ91,Q9CPU2,Q99LY9,Q9CQ54,Q8K3J1,Q9CQH3,Q91WD5,Q9DCT2,Q9CQ85,Q99LC3,P56135,Q7TMF3,O35129
86	catalytic complex	GO:CC	0.00268176	Q921G7,Q9CQ91,Q9CPU2,Q64521,Q99LY9,Q9CQ54,Q8K3J1,Q9CQH3,Q91WD5,Q9DCT2,Q99LC3,Q7TMF3
86	protein-containing complex	GO:CC	0.0341036	Q9CQV7,Q9CPQ8,Q921G7,Q9CQ91,Q9CPU2,Q64521,Q99LY9,Q9CQ54,Q8K3J1,Q9CQH3,Q91WD5,Q9DCT2,Q9CQ85,Q99LC3,P56135,Q7TMF3,O35129
92	Golgi apparatus	GO:CC	0.0493762	Q9DCZ4,P19096,P05132,Q8C167
94	membrane	GO:CC	0.0268801	Q9CQA3,Q99JR1,Q91V61,Q8VEM8,Q8CC21,Q9Z2I0,Q9WV98,Q99LY9,Q91WS0,Q91WD5,Q8K2B3,Q9DCZ4,Q9CRA5,Q62425,Q8BW75,Q64133,Q9CZP5,Q8K1R3,P03930,P59017,P56135,Q8VCX5,Q80SW1,P05132,O88741
95	membrane	GO:CC	0.0226848	Q9CQA3,Q9CQQ7,Q9CPQ8,Q91V61,Q8BH59,P63030,P50544,Q8CC21,Q91WS0,Q91WC3,Q91WD5,Q8K2B3,P58281,Q78IK2,Q9CZW5,Q9CPX8,Q9CRA5,Q8JZN5,Q62425,P56382,Q8BW75,Q5SV80,Q9DB41,Q9CZP5,Q8K1R3,P97478,Q9D880,Q8K1Z0,P56135,Q8VCX5,Q80SW1,P54116,P19096,O88741,O35465,A2APY7
98	inner mitochondrial membrane protein complex	GO:CC	5.7457e-09	Q9DCJ5,Q9D6J6,Q8R1I1,P99028,Q9CQQ7,Q9CPQ8,Q9CQJ8,Q9CPP6,Q91YT0,Q99LY9,Q8K3J1,Q91WD5,Q9DCT2,Q9CQ85,P67778,Q9DC69,Q62425,Q9D880,P56135,Q7TMF3,Q8BK30,O35129
98	respiratory chain complex I	GO:CC	1.28084e-07	Q9DCJ5,Q9D6J6,Q9CQJ8,Q9CPP6,Q91YT0,Q99LY9,Q8K3J1,Q91WD5,Q9DCT2,Q9DC69,Q62425,Q7TMF3,Q8BK30
98	NADH dehydrogenase complex	GO:CC	1.28084e-07	Q9DCJ5,Q9D6J6,Q9CQJ8,Q9CPP6,Q91YT0,Q99LY9,Q8K3J1,Q91WD5,Q9DCT2,Q9DC69,Q62425,Q7TMF3,Q8BK30
98	mitochondrial respiratory chain complex I	GO:CC	1.28084e-07	Q9DCJ5,Q9D6J6,Q9CQJ8,Q9CPP6,Q91YT0,Q99LY9,Q8K3J1,Q91WD5,Q9DCT2,Q9DC69,Q62425,Q7TMF3,Q8BK30
98	transmembrane transporter complex	GO:CC	2.78546e-07	Q9DCJ5,Q9D6J6,Q8R1I1,P99028,Q9CQJ8,Q9CPP6,Q91YT0,Q99LY9,Q8K3J1,Q91WD5,Q9DCT2,Q9DC69,Q62425,Q7TMF3,Q8BK30
98	membrane protein complex	GO:CC	6.11442e-07	Q9DCJ5,Q9D6J6,Q8R1I1,P99028,Q9CQQ7,Q9CPQ8,Q9CQJ8,Q9CPP6,Q91YT0,Q99LY9,Q8K3J1,Q91WD5,Q9DCT2,Q9CQ85,P67778,Q9DC69,Q62425,Q9D880,P56135,Q7TMF3,Q8BK30,O35129
98	transporter complex	GO:CC	1.27816e-06	Q9DCJ5,Q9D6J6,Q8R1I1,P99028,Q9CQJ8,Q9CPP6,Q91YT0,Q99LY9,Q8K3J1,Q91WD5,Q9DCT2,Q9DC69,Q62425,Q7TMF3,Q8BK30
98	respiratory chain complex	GO:CC	1.91057e-06	Q9DCJ5,Q9D6J6,Q8R1I1,P99028,Q9CQJ8,Q9CPP6,Q91YT0,Q99LY9,Q8K3J1,Q91WD5,Q9DCT2,Q9DC69,Q62425,Q7TMF3,Q8BK30
98	mitochondrial respirasome	GO:CC	2.32423e-06	Q9DCJ5,Q9D6J6,Q8R1I1,P99028,Q9CQJ8,Q9CPP6,Q91YT0,Q99LY9,Q8K3J1,Q91WD5,Q9DCT2,Q9DC69,Q62425,Q7TMF3,Q8BK30
98	oxidoreductase complex	GO:CC	2.75274e-06	Q9DCJ5,Q9D6J6,Q8R1I1,P99028,Q9CQJ8,Q9CPP6,Q91YT0,Q64521,Q99LY9,Q8K3J1,Q91WD5,Q9DCT2,Q9DC69,Q62425,Q7TMF3,Q8BK30
98	respirasome	GO:CC	3.40699e-06	Q9DCJ5,Q9D6J6,Q8R1I1,P99028,Q9CQJ8,Q9CPP6,Q91YT0,Q99LY9,Q8K3J1,Q91WD5,Q9DCT2,Q9DC69,Q62425,Q7TMF3,Q8BK30
98	integral component of membrane	GO:CC	2.23807e-05	Q9DCJ5,Q9D6J6,Q8R1I1,P99028,Q91V61,P63030,Q9CQJ8,Q9CPP6,Q91YT0,Q99LY9,Q8K3J1,Q91WD5,Q9DCT2,P67778,Q9DC69,Q62425,P59017,Q7TMF3,Q8BK30,O35465
98	intrinsic component of membrane	GO:CC	2.77961e-05	Q9DCJ5,Q9D6J6,Q8R1I1,P99028,Q91V61,P63030,Q9CQJ8,Q9CPP6,Q91YT0,Q99LY9,Q8K3J1,Q91WD5,Q9DCT2,P67778,Q9DC69,Q62425,P59017,Q7TMF3,Q8BK30,O35465
98	mitochondrial inner membrane	GO:CC	0.000192418	Q9DCJ5,Q9D6J6,Q8R1I1,P99028,Q9CQQ7,Q9CPQ8,Q91V61,P63030,P50544,Q9CQJ8,Q9CPP6,Q8CC21,Q91YT0,Q64521,Q99LY9,Q8K3J1,Q91WD5,P58281,Q9DCT2,Q9CQ85,P67778,Q9DC69,Q62425,Q9D880,Q8K1Z0,P56135,Q7TMF3,Q8BK30,O35129,A2APY7
98	organelle inner membrane	GO:CC	0.000204843	Q9DCJ5,Q9D6J6,Q8R1I1,P99028,Q9CQQ7,Q9CPQ8,Q91V61,P63030,P50544,Q9CQJ8,Q9CPP6,Q8CC21,Q91YT0,Q64521,Q99LY9,Q8K3J1,Q91WD5,P58281,Q9DCT2,Q9CQ85,P67778,Q9DC69,Q62425,Q9D880,Q8K1Z0,P56135,Q7TMF3,Q8BK30,O35129,A2APY7
98	organelle membrane	GO:CC	0.000400223	Q9DCJ5,Q9D6J6,Q8R1I1,P99028,Q9CQQ7,Q9CPQ8,Q91V61,P63030,P50544,Q9CQJ8,Q9CPP6,Q8CC21,Q91YT0,Q64521,Q99LY9,Q8K3J1,Q91WD5,P58281,Q9DCT2,Q9CQ85,P67778,P41216,Q9DC69,Q62425,Q8K1R3,Q9D880,Q8K1Z0,P56135,Q7TMF3,Q8BK30,O35465,O35129,A2APY7
98	mitochondrial protein-containing complex	GO:CC	0.00121281	Q9DCJ5,Q9D6J6,Q8R1I1,P99028,Q9CQQ7,Q9CPQ8,Q9CQJ8,Q9CPP6,Q91YT0,Q99LY9,Q8K3J1,Q91WD5,Q9DCT2,Q9CQ85,P67778,Q9DC69,Q62425,Q8K1R3,Q9D880,P56135,Q7TMF3,Q8BK30,O35129
98	mitochondrial envelope	GO:CC	0.00132631	Q9DCJ5,Q9D6J6,Q8R1I1,P99028,Q9CQQ7,Q9CPQ8,Q91V61,P63030,P50544,Q9CQJ8,Q9CPP6,Q8CC21,Q91YT0,Q64521,Q99LY9,Q8K3J1,Q91WD5,P58281,Q9DCT2,Q9CQ85,P67778,P41216,Q9DC69,Q62425,Q8K1R3,Q9D880,Q8K1Z0,P56135,Q7TMF3,Q8BK30,O35465,O35129,A2APY7
98	membrane	GO:CC	0.00159293	Q9DCJ5,Q9D6J6,Q8R1I1,P99028,Q9CQQ7,Q9CPQ8,Q91V61,P63030,P50544,Q9CQJ8,Q9CPP6,Q8CC21,Q91YT0,Q64521,Q99LY9,Q8K3J1,Q91WD5,P58281,Q9DCT2,Q9CQ85,P67778,P41216,Q9DC69,Q62425,Q8K1R3,Q9D880,Q8K1Z0,P59017,P56135,Q7TMF3,Q8BK30,O35465,O35129,A2APY7
98	catalytic complex	GO:CC	0.00181098	Q9DCJ5,Q9D6J6,Q8R1I1,P99028,Q9CQJ8,Q9CPP6,Q91YT0,Q64521,Q99LY9,Q8K3J1,Q91WD5,Q9DCT2,Q9DC69,Q62425,Q8K1R3,Q7TMF3,Q8BK30
98	envelope	GO:CC	0.00191168	Q9DCJ5,Q9D6J6,Q8R1I1,P99028,Q9CQQ7,Q9CPQ8,Q91V61,P63030,P50544,Q9CQJ8,Q9CPP6,Q8CC21,Q91YT0,Q64521,Q99LY9,Q8K3J1,Q91WD5,P58281,Q9DCT2,Q9CQ85,P67778,P41216,Q9DC69,Q62425,Q8K1R3,Q9D880,Q8K1Z0,P56135,Q7TMF3,Q8BK30,O35465,O35129,A2APY7
98	organelle envelope	GO:CC	0.00191168	Q9DCJ5,Q9D6J6,Q8R1I1,P99028,Q9CQQ7,Q9CPQ8,Q91V61,P63030,P50544,Q9CQJ8,Q9CPP6,Q8CC21,Q91YT0,Q64521,Q99LY9,Q8K3J1,Q91WD5,P58281,Q9DCT2,Q9CQ85,P67778,P41216,Q9DC69,Q62425,Q8K1R3,Q9D880,Q8K1Z0,P56135,Q7TMF3,Q8BK30,O35465,O35129,A2APY7
98	mitochondrial membrane	GO:CC	0.00300739	Q9DCJ5,Q9D6J6,Q8R1I1,P99028,Q9CQQ7,Q9CPQ8,Q91V61,P63030,P50544,Q9CQJ8,Q9CPP6,Q8CC21,Q91YT0,Q64521,Q99LY9,Q8K3J1,Q91WD5,P58281,Q9DCT2,Q9CQ85,P67778,P41216,Q9DC69,Q62425,Q9D880,Q8K1Z0,P56135,Q7TMF3,Q8BK30,O35129,A2APY7
98	protein-containing complex	GO:CC	0.0230946	Q9DCJ5,Q9D6J6,Q8R1I1,P99028,Q9CQQ7,Q9CPQ8,Q9CQJ8,Q9CPP6,Q91YT0,Q64521,Q99LY9,Q8K3J1,Q91WD5,Q9DCT2,Q9CQ85,P67778,Q9DC69,Q62425,Q8K1R3,Q9D880,Q8K1Z0,P56135,Q7TMF3,Q8BK30,O35465,O35129
103	mitochondrial respiratory chain complex I	GO:CC	7.71844e-12	Q9CR61,Q9CQZ6,Q9CQ91,Q9CPU2,Q9D6J5,Q9CQ54,Q3UIU2,Q9CQH3,Q99LC3,O09111,P52503
103	NADH dehydrogenase complex	GO:CC	7.71844e-12	Q9CR61,Q9CQZ6,Q9CQ91,Q9CPU2,Q9D6J5,Q9CQ54,Q3UIU2,Q9CQH3,Q99LC3,O09111,P52503
103	respiratory chain complex I	GO:CC	7.71844e-12	Q9CR61,Q9CQZ6,Q9CQ91,Q9CPU2,Q9D6J5,Q9CQ54,Q3UIU2,Q9CQH3,Q99LC3,O09111,P52503
103	transmembrane transporter complex	GO:CC	1.00074e-09	Q9CR61,Q9CQZ6,Q9CQ91,Q9CPU2,Q9D6J5,Q9CQ54,Q3UIU2,Q9CQH3,Q99LC3,O09111,P52503
103	transporter complex	GO:CC	3.23416e-09	Q9CR61,Q9CQZ6,Q9CQ91,Q9CPU2,Q9D6J5,Q9CQ54,Q3UIU2,Q9CQH3,Q99LC3,O09111,P52503
103	respiratory chain complex	GO:CC	4.42018e-09	Q9CR61,Q9CQZ6,Q9CQ91,Q9CPU2,Q9D6J5,Q9CQ54,Q3UIU2,Q9CQH3,Q99LC3,O09111,P52503
103	mitochondrial respirasome	GO:CC	5.1498e-09	Q9CR61,Q9CQZ6,Q9CQ91,Q9CPU2,Q9D6J5,Q9CQ54,Q3UIU2,Q9CQH3,Q99LC3,O09111,P52503
103	respirasome	GO:CC	6.94472e-09	Q9CR61,Q9CQZ6,Q9CQ91,Q9CPU2,Q9D6J5,Q9CQ54,Q3UIU2,Q9CQH3,Q99LC3,O09111,P52503
103	oxidoreductase complex	GO:CC	3.13411e-08	Q9CR61,Q9CQZ6,Q9CQ91,Q9CPU2,Q9D6J5,Q9CQ54,Q3UIU2,Q9CQH3,Q99LC3,O09111,P52503
103	membrane protein complex	GO:CC	1.5408e-06	Q9CR61,Q9CQZ6,Q9CQ91,Q9CPU2,Q9D6J5,Q9D173,Q9CQ54,Q3UIU2,Q9CQH3,Q99LC3,O09111,P52503
103	inner mitochondrial membrane protein complex	GO:CC	2.53554e-06	Q9CR61,Q9CQZ6,Q9CQ91,Q9CPU2,Q9D6J5,Q9CQ54,Q3UIU2,Q9CQH3,Q99LC3,O09111,P52503
103	catalytic complex	GO:CC	1.55551e-05	Q9CR61,Q9CQZ6,Q9CQ91,Q9CPU2,Q9D6J5,Q9CQ54,Q3UIU2,Q9CQH3,Q99LC3,O09111,P52503
103	integral component of membrane	GO:CC	2.49314e-05	Q9CR61,Q9CQZ6,Q9CQ91,Q9CPU2,Q9D6J5,Q9CQ54,Q3UIU2,Q9CQH3,Q99LC3,O09111,P52503
103	intrinsic component of membrane	GO:CC	2.84123e-05	Q9CR61,Q9CQZ6,Q9CQ91,Q9CPU2,Q9D6J5,Q9CQ54,Q3UIU2,Q9CQH3,Q99LC3,O09111,P52503
103	mitochondrial protein-containing complex	GO:CC	0.000407377	Q9CR61,Q9CQZ6,Q9CQ91,Q9CPU2,Q9D6J5,Q9D173,Q9CQ54,Q3UIU2,Q9CQH3,Q99LC3,O09111,P52503
103	protein-containing complex	GO:CC	0.0246636	Q9CR61,Q9CQZ6,Q9CQ91,Q9CPU2,Q9D6J5,Q9D173,Q9CQ54,Q3UIU2,Q9CQH3,Q99LC3,O09111,P52503
104	transmembrane transporter complex	GO:CC	0.0461689	Q9DC70,Q3TQB2,P00158
115	peroxisome	GO:CC	0.011482	Q921H8,Q9WUR2,Q8VCH0,Q9DBM2,Q8BGC4,P99029,P58044,P38060,O09174,P54071,P34914
115	microbody	GO:CC	0.011482	Q921H8,Q9WUR2,Q8VCH0,Q9DBM2,Q8BGC4,P99029,P58044,P38060,O09174,P54071,P34914
118	mitochondrial respiratory chain complex I	GO:CC	2.35673e-06	Q9CQZ6,Q9CQ91,Q9CPU2,Q9D6J5,Q9CQ54,Q9CQH3,Q91WD5,Q99LC3
118	respiratory chain complex I	GO:CC	2.35673e-06	Q9CQZ6,Q9CQ91,Q9CPU2,Q9D6J5,Q9CQ54,Q9CQH3,Q91WD5,Q99LC3
118	NADH dehydrogenase complex	GO:CC	2.35673e-06	Q9CQZ6,Q9CQ91,Q9CPU2,Q9D6J5,Q9CQ54,Q9CQH3,Q91WD5,Q99LC3
118	oxidoreductase complex	GO:CC	4.87876e-05	Q921G7,Q9CQZ6,Q9CQ91,Q9CPU2,Q9D6J5,Q9CQ54,Q9CQH3,Q91WD5,Q99LC3
118	transmembrane transporter complex	GO:CC	6.57928e-05	Q9CQZ6,Q9CQ91,Q9CPU2,Q9D6J5,Q9CQ54,Q9CQH3,Q91WD5,Q99LC3
118	integral component of membrane	GO:CC	8.47408e-05	Q921G7,Q8JZQ2,Q9CQZ6,Q9CQ91,Q9CPU2,Q9D6J5,Q9CQ54,Q9CQH3,Q91WD5,Q9D2R6,Q99LC3
118	intrinsic component of membrane	GO:CC	9.63865e-05	Q921G7,Q8JZQ2,Q9CQZ6,Q9CQ91,Q9CPU2,Q9D6J5,Q9CQ54,Q9CQH3,Q91WD5,Q9D2R6,Q99LC3
118	transporter complex	GO:CC	0.000146766	Q9CQZ6,Q9CQ91,Q9CPU2,Q9D6J5,Q9CQ54,Q9CQH3,Q91WD5,Q99LC3
118	respiratory chain complex	GO:CC	0.000181688	Q9CQZ6,Q9CQ91,Q9CPU2,Q9D6J5,Q9CQ54,Q9CQH3,Q91WD5,Q99LC3
118	mitochondrial respirasome	GO:CC	0.000201669	Q9CQZ6,Q9CQ91,Q9CPU2,Q9D6J5,Q9CQ54,Q9CQH3,Q91WD5,Q99LC3
118	respirasome	GO:CC	0.000247337	Q9CQZ6,Q9CQ91,Q9CPU2,Q9D6J5,Q9CQ54,Q9CQH3,Q91WD5,Q99LC3
118	catalytic complex	GO:CC	0.000639868	Q921G7,Q8JZQ2,Q9CQZ6,Q9CQ91,Q9CPU2,Q9D6J5,Q9CQ54,Q9CQH3,Q91WD5,Q99LC3
118	membrane protein complex	GO:CC	0.00108266	Q8JZQ2,Q9CQZ6,Q9CQ91,Q9CPU2,Q9D6J5,Q9D173,Q9CQ54,Q9CQH3,Q91WD5,Q99LC3
118	inner mitochondrial membrane protein complex	GO:CC	0.00148569	Q8JZQ2,Q9CQZ6,Q9CQ91,Q9CPU2,Q9D6J5,Q9CQ54,Q9CQH3,Q91WD5,Q99LC3
118	mitochondrial protein-containing complex	GO:CC	0.0125854	Q921G7,Q8JZQ2,Q9CQZ6,Q9CQ91,Q9CPU2,Q9D6J5,Q9D173,Q9CQ54,Q9CQH3,Q91WD5,Q99LC3
118	membrane	GO:CC	0.0172619	P50544,Q921G7,Q8JZQ2,Q9CQZ6,Q9CQ91,Q9CPU2,Q9D6J5,Q9D173,Q9CQ54,Q791T5,Q9CQH3,Q91WD5,Q9D2R6,Q99LC3,Q9DB41
118	mitochondrial inner membrane	GO:CC	0.0203362	P50544,Q921G7,Q8JZQ2,Q9CQZ6,Q9CQ91,Q9CPU2,Q9D6J5,Q9CQ54,Q9CQH3,Q91WD5,Q9D2R6,Q99LC3,Q9DB41
118	organelle inner membrane	GO:CC	0.0209357	P50544,Q921G7,Q8JZQ2,Q9CQZ6,Q9CQ91,Q9CPU2,Q9D6J5,Q9CQ54,Q9CQH3,Q91WD5,Q9D2R6,Q99LC3,Q9DB41
118	mitochondrial membrane	GO:CC	0.0216646	P50544,Q921G7,Q8JZQ2,Q9CQZ6,Q9CQ91,Q9CPU2,Q9D6J5,Q9D173,Q9CQ54,Q9CQH3,Q91WD5,Q9D2R6,Q99LC3,Q9DB41
118	organelle membrane	GO:CC	0.0366709	P50544,Q921G7,Q8JZQ2,Q9CQZ6,Q9CQ91,Q9CPU2,Q9D6J5,Q9D173,Q9CQ54,Q9CQH3,Q91WD5,Q9D2R6,Q99LC3,Q9DB41
119	peroxisome	GO:CC	0.0299675	P51660,P47934
119	microbody	GO:CC	0.0299675	P51660,P47934
125	mitochondrial respiratory chain complex I	GO:CC	6.20739e-05	Q99LY9,Q9D6J5,Q9CQ54,Q8K3J1,Q9CQH3,Q91WD5,Q99LC3,Q8BK30
125	NADH dehydrogenase complex	GO:CC	6.20739e-05	Q99LY9,Q9D6J5,Q9CQ54,Q8K3J1,Q9CQH3,Q91WD5,Q99LC3,Q8BK30
125	respiratory chain complex I	GO:CC	6.20739e-05	Q99LY9,Q9D6J5,Q9CQ54,Q8K3J1,Q9CQH3,Q91WD5,Q99LC3,Q8BK30
125	membrane	GO:CC	0.00043647	Q9CQV7,Q8BH59,P50544,Q9D8W7,Q921G7,Q99LY9,Q9D6J5,Q9CQ54,Q8K3J1,Q791T5,Q9CQH3,Q91WD5,Q61387,Q922Q1,Q9D2R6,Q99LC3,Q9DB41,P56135,Q8BK30,O88741,O35465
125	mitochondrial respirasome	GO:CC	0.000463918	Q99LY9,Q9D6J5,Q9CQ54,Q8K3J1,Q9CQH3,Q91WD5,Q61387,Q99LC3,Q8BK30
125	respirasome	GO:CC	0.00058051	Q99LY9,Q9D6J5,Q9CQ54,Q8K3J1,Q9CQH3,Q91WD5,Q61387,Q99LC3,Q8BK30
125	organelle membrane	GO:CC	0.000666715	Q9CQV7,Q8BH59,P50544,Q9D8W7,Q921G7,Q99LY9,Q9D6J5,Q9CQ54,Q8K3J1,Q9CQH3,Q91WD5,Q61387,Q922Q1,Q9D2R6,Q99LC3,Q9DB41,P56135,Q8BK30,O88741,O35465
125	integral component of membrane	GO:CC	0.00111904	Q921G7,Q99LY9,Q9D6J5,Q9CQ54,Q8K3J1,Q9CQH3,Q91WD5,Q9D2R6,Q99LC3,Q8BK30,O88741,O35465
125	mitochondrial inner membrane	GO:CC	0.00126361	Q9CQV7,Q8BH59,P50544,Q9D8W7,Q921G7,Q99LY9,Q9D6J5,Q9CQ54,Q8K3J1,Q9CQH3,Q91WD5,Q61387,Q922Q1,Q9D2R6,Q99LC3,Q9DB41,P56135,Q8BK30
125	intrinsic component of membrane	GO:CC	0.00127705	Q921G7,Q99LY9,Q9D6J5,Q9CQ54,Q8K3J1,Q9CQH3,Q91WD5,Q9D2R6,Q99LC3,Q8BK30,O88741,O35465
125	organelle inner membrane	GO:CC	0.0013159	Q9CQV7,Q8BH59,P50544,Q9D8W7,Q921G7,Q99LY9,Q9D6J5,Q9CQ54,Q8K3J1,Q9CQH3,Q91WD5,Q61387,Q922Q1,Q9D2R6,Q99LC3,Q9DB41,P56135,Q8BK30
125	mitochondrial envelope	GO:CC	0.00150865	Q9CQV7,Q8BH59,P50544,Q9D8W7,Q921G7,Q99LY9,Q9D6J5,Q9CQ54,Q8K3J1,Q9CQH3,Q91WD5,Q61387,Q922Q1,Q9D2R6,Q99LC3,Q9DB41,P56135,Q8BK30,O88741,O35465
125	transmembrane transporter complex	GO:CC	0.00154986	Q99LY9,Q9D6J5,Q9CQ54,Q8K3J1,Q9CQH3,Q91WD5,Q99LC3,Q8BK30
125	oxidoreductase complex	GO:CC	0.00178479	Q921G7,Q99LY9,Q9D6J5,Q9CQ54,Q8K3J1,Q9CQH3,Q91WD5,Q99LC3,Q8BK30
125	envelope	GO:CC	0.00193971	Q9CQV7,Q8BH59,P50544,Q9D8W7,Q921G7,Q99LY9,Q9D6J5,Q9CQ54,Q8K3J1,Q9CQH3,Q91WD5,Q61387,Q922Q1,Q9D2R6,Q99LC3,Q9DB41,P56135,Q8BK30,O88741,O35465
125	organelle envelope	GO:CC	0.00193971	Q9CQV7,Q8BH59,P50544,Q9D8W7,Q921G7,Q99LY9,Q9D6J5,Q9CQ54,Q8K3J1,Q9CQH3,Q91WD5,Q61387,Q922Q1,Q9D2R6,Q99LC3,Q9DB41,P56135,Q8BK30,O88741,O35465
125	mitochondrial membrane	GO:CC	0.00288431	Q9CQV7,Q8BH59,P50544,Q9D8W7,Q921G7,Q99LY9,Q9D6J5,Q9CQ54,Q8K3J1,Q9CQH3,Q91WD5,Q61387,Q922Q1,Q9D2R6,Q99LC3,Q9DB41,P56135,Q8BK30,O88741
125	transporter complex	GO:CC	0.0033357	Q99LY9,Q9D6J5,Q9CQ54,Q8K3J1,Q9CQH3,Q91WD5,Q99LC3,Q8BK30
125	respiratory chain complex	GO:CC	0.00408726	Q99LY9,Q9D6J5,Q9CQ54,Q8K3J1,Q9CQH3,Q91WD5,Q99LC3,Q8BK30
125	inner mitochondrial membrane protein complex	GO:CC	0.00701707	Q9CQV7,Q99LY9,Q9D6J5,Q9CQ54,Q8K3J1,Q9CQH3,Q91WD5,Q99LC3,P56135,Q8BK30
125	membrane protein complex	GO:CC	0.0484529	Q9CQV7,Q99LY9,Q9D6J5,Q9CQ54,Q8K3J1,Q9CQH3,Q91WD5,Q99LC3,P56135,Q8BK30
130	mitochondrial intermembrane space protein transporter complex	GO:CC	0.0124766	Q9WVA2,P62075
136	respiratory chain complex I	GO:CC	2.27807e-05	Q9CQ91,Q9CPU2,Q9D6J5,Q9CQ54,Q8K3J1,Q9CQH3,Q91WD5,Q99LC3,Q8BK30
136	mitochondrial respiratory chain complex I	GO:CC	2.27807e-05	Q9CQ91,Q9CPU2,Q9D6J5,Q9CQ54,Q8K3J1,Q9CQH3,Q91WD5,Q99LC3,Q8BK30
136	NADH dehydrogenase complex	GO:CC	2.27807e-05	Q9CQ91,Q9CPU2,Q9D6J5,Q9CQ54,Q8K3J1,Q9CQH3,Q91WD5,Q99LC3,Q8BK30
136	mitochondrial respirasome	GO:CC	0.000318151	Q9CQ91,Q9CPU2,Q9D6J5,Q9CQ54,Q8K3J1,Q9CQH3,Q91WD5,Q61387,Q99LC3,Q8BK30
136	respirasome	GO:CC	0.000407715	Q9CQ91,Q9CPU2,Q9D6J5,Q9CQ54,Q8K3J1,Q9CQH3,Q91WD5,Q61387,Q99LC3,Q8BK30
136	transmembrane transporter complex	GO:CC	0.000862605	Q9CQ91,Q9CPU2,Q9D6J5,Q9CQ54,Q8K3J1,Q9CQH3,Q91WD5,Q99LC3,Q8BK30
136	inner mitochondrial membrane protein complex	GO:CC	0.0012987	Q9CQV7,Q9CQ91,Q9CPU2,Q9D6J5,Q9CQ54,Q8K3J1,Q9CQH3,Q91WD5,Q9CQ85,Q99LC3,Q8BK30,O35129
136	oxidoreductase complex	GO:CC	0.0014093	Q9CQ91,Q9CPU2,Q64521,Q9D6J5,Q9CQ54,Q8K3J1,Q9CQH3,Q91WD5,Q99LC3,Q8BK30
136	transporter complex	GO:CC	0.00204054	Q9CQ91,Q9CPU2,Q9D6J5,Q9CQ54,Q8K3J1,Q9CQH3,Q91WD5,Q99LC3,Q8BK30
136	respiratory chain complex	GO:CC	0.0025629	Q9CQ91,Q9CPU2,Q9D6J5,Q9CQ54,Q8K3J1,Q9CQH3,Q91WD5,Q99LC3,Q8BK30
136	mitochondrial inner membrane	GO:CC	0.00270672	Q9CQV7,P63030,Q9CQ91,Q9CPU2,Q64521,Q9D6J5,Q9CQ54,Q8K3J1,Q9CQH3,Q91WD5,Q61387,Q9CQ85,Q9D2R6,Q99LC3,Q60930,Q9DB41,P97478,Q9D6M3,Q8BK30,O35129
136	organelle inner membrane	GO:CC	0.00282589	Q9CQV7,P63030,Q9CQ91,Q9CPU2,Q64521,Q9D6J5,Q9CQ54,Q8K3J1,Q9CQH3,Q91WD5,Q61387,Q9CQ85,Q9D2R6,Q99LC3,Q60930,Q9DB41,P97478,Q9D6M3,Q8BK30,O35129
136	integral component of membrane	GO:CC	0.0119292	P63030,Q9CQ91,Q9CPU2,Q9D6J5,Q9CQ54,Q8K3J1,Q9CQH3,Q91WD5,Q9D2R6,Q99LC3,P59017,Q8BK30
136	membrane protein complex	GO:CC	0.0135094	Q9CQV7,Q9CQ91,Q9CPU2,Q9D6J5,Q9CQ54,Q8K3J1,Q9CQH3,Q91WD5,Q9CQ85,Q99LC3,Q8BK30,O35129
136	intrinsic component of membrane	GO:CC	0.0135094	P63030,Q9CQ91,Q9CPU2,Q9D6J5,Q9CQ54,Q8K3J1,Q9CQH3,Q91WD5,Q9D2R6,Q99LC3,P59017,Q8BK30
136	membrane	GO:CC	0.0268234	Q9CQV7,P63030,Q9CQ91,Q9CPU2,Q64521,Q9D6J5,Q9CQ54,Q8K3J1,Q791T5,Q9CQH3,Q91WD5,Q61387,Q9CQ85,Q9D2R6,Q99LC3,Q60930,Q9DB41,P97478,P59017,Q9D6M3,Q8BK30,O35129
136	mitochondrial membrane	GO:CC	0.0482238	Q9CQV7,P63030,Q9CQ91,Q9CPU2,Q64521,Q9D6J5,Q9CQ54,Q8K3J1,Q9CQH3,Q91WD5,Q61387,Q9CQ85,Q9D2R6,Q99LC3,Q60930,Q9DB41,P97478,Q9D6M3,Q8BK30,O35129
138	transmembrane transporter complex	GO:CC	0.00159935	Q9DB10,Q9D6J5,Q9CQ54,Q8K3J1,Q9CQH3,Q91WD5,Q99LC3
138	membrane protein complex	GO:CC	0.00168055	Q8JZQ2,Q9DB10,Q9D6J5,Q9D173,Q9CQ54,Q8K3J1,Q9CQH3,Q91WD5,Q9CQ85,Q99LC3
138	mitochondrial respiratory chain complex I	GO:CC	0.00180871	Q9D6J5,Q9CQ54,Q8K3J1,Q9CQH3,Q91WD5,Q99LC3
138	NADH dehydrogenase complex	GO:CC	0.00180871	Q9D6J5,Q9CQ54,Q8K3J1,Q9CQH3,Q91WD5,Q99LC3
138	respiratory chain complex I	GO:CC	0.00180871	Q9D6J5,Q9CQ54,Q8K3J1,Q9CQH3,Q91WD5,Q99LC3
138	inner mitochondrial membrane protein complex	GO:CC	0.00230614	Q8JZQ2,Q9DB10,Q9D6J5,Q9CQ54,Q8K3J1,Q9CQH3,Q91WD5,Q9CQ85,Q99LC3
138	transporter complex	GO:CC	0.00317342	Q9DB10,Q9D6J5,Q9CQ54,Q8K3J1,Q9CQH3,Q91WD5,Q99LC3
138	integral component of membrane	GO:CC	0.0132884	Q8JZQ2,Q9DB10,Q9D6J5,Q9CQ54,Q8K3J1,Q9CQH3,Q91WD5,Q9D2R6,Q99LC3
138	intrinsic component of membrane	GO:CC	0.0146767	Q8JZQ2,Q9DB10,Q9D6J5,Q9CQ54,Q8K3J1,Q9CQH3,Q91WD5,Q9D2R6,Q99LC3
138	respiratory chain complex	GO:CC	0.0400741	Q9D6J5,Q9CQ54,Q8K3J1,Q9CQH3,Q91WD5,Q99LC3
138	mitochondrial respirasome	GO:CC	0.0431523	Q9D6J5,Q9CQ54,Q8K3J1,Q9CQH3,Q91WD5,Q99LC3
138	respirasome	GO:CC	0.0498701	Q9D6J5,Q9CQ54,Q8K3J1,Q9CQH3,Q91WD5,Q99LC3
140	proton-transporting ATP synthase complex	GO:CC	0.000172482	Q9DCX2,Q91VR2,Q06185,P56382,Q9D3D9,P03930
140	mitochondrial proton-transporting ATP synthase complex	GO:CC	0.000172482	Q9DCX2,Q91VR2,Q06185,P56382,Q9D3D9,P03930
140	proton-transporting two-sector ATPase complex	GO:CC	0.000172482	Q9DCX2,Q91VR2,Q06185,P56382,Q9D3D9,P03930
140	mitochondrial proton-transporting ATP synthase complex, catalytic sector F(1)	GO:CC	0.0116593	Q91VR2,P56382,Q9D3D9
140	proton-transporting two-sector ATPase complex, catalytic domain	GO:CC	0.0230152	Q91VR2,P56382,Q9D3D9
140	proton-transporting ATP synthase complex, catalytic core F(1)	GO:CC	0.0230152	Q91VR2,P56382,Q9D3D9
140	mitochondrial envelope	GO:CC	0.0246339	Q9DCX2,Q91VR2,Q8BH59,P50544,Q91WS0,Q06185,P58281,Q9DCZ4,Q9DCN2,Q9CZW5,Q9CPX8,P67778,P56382,Q9D3D9,Q64133,Q8R086,P03930,Q99N92,Q8K1Z0
140	organelle envelope	GO:CC	0.0308984	Q9DCX2,Q91VR2,Q8BH59,P50544,Q91WS0,Q06185,P58281,Q9DCZ4,Q9DCN2,Q9CZW5,Q9CPX8,P67778,P56382,Q9D3D9,Q64133,Q8R086,P03930,Q99N92,Q8K1Z0
140	envelope	GO:CC	0.0308984	Q9DCX2,Q91VR2,Q8BH59,P50544,Q91WS0,Q06185,P58281,Q9DCZ4,Q9DCN2,Q9CZW5,Q9CPX8,P67778,P56382,Q9D3D9,Q64133,Q8R086,P03930,Q99N92,Q8K1Z0
140	mitochondrial membrane	GO:CC	0.0391054	Q9DCX2,Q91VR2,Q8BH59,P50544,Q91WS0,Q06185,P58281,Q9DCZ4,Q9DCN2,Q9CZW5,Q9CPX8,P67778,P56382,Q9D3D9,Q64133,P03930,Q99N92,Q8K1Z0
141	mitochondrial pyruvate dehydrogenase complex	GO:CC	0.00241358	Q9D051,O08749,P35486
141	pyruvate dehydrogenase complex	GO:CC	0.00384053	Q9D051,O08749,P35486
143	myelin sheath	GO:CC	0.00310467	Q9DB77,Q9D6J6,Q9CZ13
143	transmembrane transporter complex	GO:CC	0.00935902	Q9DB77,Q9D6J6,Q9CZ13
143	mitochondrial respiratory chain complex III	GO:CC	0.0122612	Q9DB77,Q9CZ13
143	respiratory chain complex III	GO:CC	0.0122612	Q9DB77,Q9CZ13
143	transporter complex	GO:CC	0.0127206	Q9DB77,Q9D6J6,Q9CZ13
143	respiratory chain complex	GO:CC	0.0138105	Q9DB77,Q9D6J6,Q9CZ13
143	mitochondrial respirasome	GO:CC	0.014378	Q9DB77,Q9D6J6,Q9CZ13
143	respirasome	GO:CC	0.0155594	Q9DB77,Q9D6J6,Q9CZ13
143	oxidoreductase complex	GO:CC	0.0232266	Q9DB77,Q9D6J6,Q9CZ13
150	mitochondrial electron transfer flavoprotein complex	GO:CC	0.000716434	Q9DCW4,Q99LC5
150	electron transfer flavoprotein complex	GO:CC	0.000716434	Q9DCW4,Q99LC5
152	mitochondrial respiratory chain complex III	GO:CC	6.42615e-06	Q9DB77,Q9CZ13,Q9CQ69,Q8R1I1
152	respiratory chain complex III	GO:CC	6.42615e-06	Q9DB77,Q9CZ13,Q9CQ69,Q8R1I1
152	transmembrane transporter complex	GO:CC	0.000306488	Q9DB77,Q9CZ13,Q9CQ69,Q8R1I1,Q9DCS9
152	transporter complex	GO:CC	0.000512233	Q9DB77,Q9CZ13,Q9CQ69,Q8R1I1,Q9DCS9
152	cytochrome complex	GO:CC	0.000518863	Q9DB77,Q9CZ13,Q9CQ69,Q8R1I1
152	respiratory chain complex	GO:CC	0.000587644	Q9DB77,Q9CZ13,Q9CQ69,Q8R1I1,Q9DCS9
152	mitochondrial respirasome	GO:CC	0.000628521	Q9DB77,Q9CZ13,Q9CQ69,Q8R1I1,Q9DCS9
152	respirasome	GO:CC	0.000717049	Q9DB77,Q9CZ13,Q9CQ69,Q8R1I1,Q9DCS9
152	oxidoreductase complex	GO:CC	0.00139731	Q9DB77,Q9CZ13,Q9CQ69,Q8R1I1,Q9DCS9
152	inner mitochondrial membrane protein complex	GO:CC	0.0100481	Q9DB77,Q9CZ13,Q9CQ69,Q8R1I1,Q9DCS9
152	catalytic complex	GO:CC	0.0229679	Q9DB77,Q9CZ13,Q9CQ69,Q8R1I1,Q9DCS9
152	integral component of membrane	GO:CC	0.0285119	Q9DB77,Q9CZ13,Q9CQ69,Q8R1I1,Q9DCS9
152	membrane protein complex	GO:CC	0.030275	Q9DB77,Q9CZ13,Q9CQ69,Q8R1I1,Q9DCS9
152	intrinsic component of membrane	GO:CC	0.030275	Q9DB77,Q9CZ13,Q9CQ69,Q8R1I1,Q9DCS9
153	mitochondrial respiratory chain complex III	GO:CC	7.15825e-06	Q9DB77,Q9CZ13,Q9CQ69,Q8R1I1
153	respiratory chain complex III	GO:CC	7.15825e-06	Q9DB77,Q9CZ13,Q9CQ69,Q8R1I1
153	cytochrome complex	GO:CC	0.000577974	Q9DB77,Q9CZ13,Q9CQ69,Q8R1I1
153	inner mitochondrial membrane protein complex	GO:CC	0.0111929	P56480,Q9DB77,Q9CZ13,Q9CQ69,Q8R1I1
153	transmembrane transporter complex	GO:CC	0.014396	Q9DB77,Q9CZ13,Q9CQ69,Q8R1I1
153	transporter complex	GO:CC	0.0215087	Q9DB77,Q9CZ13,Q9CQ69,Q8R1I1
153	respiratory chain complex	GO:CC	0.023945	Q9DB77,Q9CZ13,Q9CQ69,Q8R1I1
153	mitochondrial respirasome	GO:CC	0.0252364	Q9DB77,Q9CZ13,Q9CQ69,Q8R1I1
153	respirasome	GO:CC	0.0279717	Q9DB77,Q9CZ13,Q9CQ69,Q8R1I1
153	membrane protein complex	GO:CC	0.033724	P56480,Q9DB77,Q9CZ13,Q9CQ69,Q8R1I1
153	oxidoreductase complex	GO:CC	0.0470705	Q9DB77,Q9CZ13,Q9CQ69,Q8R1I1
156	oxidoreductase complex	GO:CC	2.60532e-06	Q9DB77,Q9D6J6,P99028,Q91YT0,Q64521,Q91WD5,Q9DC69,Q3TQB2
156	transmembrane transporter complex	GO:CC	1.03567e-05	Q9DB77,Q9D6J6,P99028,Q91YT0,Q91WD5,Q9DC69,Q3TQB2
156	transporter complex	GO:CC	2.12873e-05	Q9DB77,Q9D6J6,P99028,Q91YT0,Q91WD5,Q9DC69,Q3TQB2
156	respiratory chain complex	GO:CC	2.58003e-05	Q9DB77,Q9D6J6,P99028,Q91YT0,Q91WD5,Q9DC69,Q3TQB2
156	mitochondrial respirasome	GO:CC	2.83455e-05	Q9DB77,Q9D6J6,P99028,Q91YT0,Q91WD5,Q9DC69,Q3TQB2
156	respirasome	GO:CC	3.40802e-05	Q9DB77,Q9D6J6,P99028,Q91YT0,Q91WD5,Q9DC69,Q3TQB2
156	catalytic complex	GO:CC	0.000237048	Q9DB77,Q9D6J6,P99028,Q91YT0,Q64521,Q91WD5,Q9DC69,Q3TQB2
156	mitochondrial respiratory chain complex I	GO:CC	0.000857179	Q9D6J6,Q91YT0,Q91WD5,Q9DC69,Q3TQB2
156	NADH dehydrogenase complex	GO:CC	0.000857179	Q9D6J6,Q91YT0,Q91WD5,Q9DC69,Q3TQB2
156	respiratory chain complex I	GO:CC	0.000857179	Q9D6J6,Q91YT0,Q91WD5,Q9DC69,Q3TQB2
156	inner mitochondrial membrane protein complex	GO:CC	0.00132068	Q9DB77,Q9D6J6,P99028,Q91YT0,Q91WD5,Q9DC69,Q3TQB2
156	integral component of membrane	GO:CC	0.00548609	Q9DB77,Q9D6J6,P99028,Q91YT0,Q91WD5,Q9DC69,Q3TQB2
156	membrane protein complex	GO:CC	0.00595187	Q9DB77,Q9D6J6,P99028,Q91YT0,Q91WD5,Q9DC69,Q3TQB2
156	intrinsic component of membrane	GO:CC	0.00595187	Q9DB77,Q9D6J6,P99028,Q91YT0,Q91WD5,Q9DC69,Q3TQB2
158	inner mitochondrial membrane protein complex	GO:CC	0.000174542	P56480,Q9DCX2,Q9DB77,Q9CZ13,Q8R1I1,Q8CCM6
158	membrane protein complex	GO:CC	0.00068153	P56480,Q9DCX2,Q9DB77,Q9CZ13,Q8R1I1,Q8CCM6
158	mitochondrial respiratory chain complex III	GO:CC	0.000944201	Q9DB77,Q9CZ13,Q8R1I1
158	respiratory chain complex III	GO:CC	0.000944201	Q9DB77,Q9CZ13,Q8R1I1
158	myelin sheath	GO:CC	0.00244366	P56480,Q9DCX2,Q9DB77,Q9CZ13
158	mitochondrial protein-containing complex	GO:CC	0.0123919	P56480,Q9DCX2,Q9DB77,Q9CZ13,Q8R1I1,Q8CCM6
158	cytochrome complex	GO:CC	0.0223337	Q9DB77,Q9CZ13,Q8R1I1
159	mitochondrial respiratory chain complex III	GO:CC	0.00328765	P99028,Q9CR68,NA,NA
159	respiratory chain complex III	GO:CC	0.00328765	P99028,Q9CR68,NA,NA
159	cytochrome complex	GO:CC	0.0260024	P99028,Q9CR68,NA,NA
163	transmembrane transporter complex	GO:CC	0.000442737	Q9CZ13,Q8R1I1,Q9CPP6,Q99LC3
163	transporter complex	GO:CC	0.000668621	Q9CZ13,Q8R1I1,Q9CPP6,Q99LC3
163	respiratory chain complex	GO:CC	0.000746649	Q9CZ13,Q8R1I1,Q9CPP6,Q99LC3
163	mitochondrial respirasome	GO:CC	0.000788129	Q9CZ13,Q8R1I1,Q9CPP6,Q99LC3
163	respirasome	GO:CC	0.00087625	Q9CZ13,Q8R1I1,Q9CPP6,Q99LC3
163	oxidoreductase complex	GO:CC	0.00149989	Q9CZ13,Q8R1I1,Q9CPP6,Q99LC3
163	inner mitochondrial membrane protein complex	GO:CC	0.00742243	Q9CZ13,Q8R1I1,Q9CPP6,Q99LC3
163	catalytic complex	GO:CC	0.0145827	Q9CZ13,Q8R1I1,Q9CPP6,Q99LC3
163	integral component of membrane	GO:CC	0.0174107	Q9CZ13,Q8R1I1,Q9CPP6,Q99LC3
163	membrane protein complex	GO:CC	0.0182894	Q9CZ13,Q8R1I1,Q9CPP6,Q99LC3
163	intrinsic component of membrane	GO:CC	0.0182894	Q9CZ13,Q8R1I1,Q9CPP6,Q99LC3
163	respiratory chain complex III	GO:CC	0.0200525	Q9CZ13,Q8R1I1
163	mitochondrial respiratory chain complex III	GO:CC	0.0200525	Q9CZ13,Q8R1I1
167	mitochondrial respiratory chain complex I	GO:CC	4.41455e-18	Q9Z1P6,Q9DCJ5,Q91VD9,Q9CQZ5,Q9CQJ8,Q9CQC7,Q9CPP6,Q9DCS9,Q9DC70,Q9CQZ6,Q9CPU2,Q91YT0,Q99LY9,Q9D6J5,Q9CQ54,Q8K3J1,Q3UIU2,Q9CQH3,Q91WD5,Q9DCT2,Q9DC69,Q62425,Q7TMF3,Q8BK30
167	respiratory chain complex I	GO:CC	4.41455e-18	Q9Z1P6,Q9DCJ5,Q91VD9,Q9CQZ5,Q9CQJ8,Q9CQC7,Q9CPP6,Q9DCS9,Q9DC70,Q9CQZ6,Q9CPU2,Q91YT0,Q99LY9,Q9D6J5,Q9CQ54,Q8K3J1,Q3UIU2,Q9CQH3,Q91WD5,Q9DCT2,Q9DC69,Q62425,Q7TMF3,Q8BK30
167	NADH dehydrogenase complex	GO:CC	4.41455e-18	Q9Z1P6,Q9DCJ5,Q91VD9,Q9CQZ5,Q9CQJ8,Q9CQC7,Q9CPP6,Q9DCS9,Q9DC70,Q9CQZ6,Q9CPU2,Q91YT0,Q99LY9,Q9D6J5,Q9CQ54,Q8K3J1,Q3UIU2,Q9CQH3,Q91WD5,Q9DCT2,Q9DC69,Q62425,Q7TMF3,Q8BK30
167	mitochondrial respirasome	GO:CC	9.21974e-16	Q9Z1P6,Q9DCJ5,Q91VD9,P99028,Q9CQT9,Q9CQZ5,Q9CQJ8,Q9CQC7,Q9CPP6,Q9DCS9,Q9DC70,Q9CQZ6,Q9CPU2,Q91YT0,Q99LY9,Q9D6J5,Q9CQ54,Q8K3J1,Q3UIU2,Q9CQH3,Q91WD5,Q61387,Q9DCT2,Q9DC69,Q62425,Q7TMF3,Q8BK30,P00158
167	respirasome	GO:CC	2.10543e-15	Q9Z1P6,Q9DCJ5,Q91VD9,P99028,Q9CQT9,Q9CQZ5,Q9CQJ8,Q9CQC7,Q9CPP6,Q9DCS9,Q9DC70,Q9CQZ6,Q9CPU2,Q91YT0,Q99LY9,Q9D6J5,Q9CQ54,Q8K3J1,Q3UIU2,Q9CQH3,Q91WD5,Q61387,Q9DCT2,Q9DC69,Q62425,Q7TMF3,Q8BK30,P00158
167	transmembrane transporter complex	GO:CC	2.93602e-15	Q9Z1P6,Q9DCJ5,Q91VD9,P99028,Q9CQZ5,Q9CQJ8,Q9CQC7,Q9CPP6,Q9DCS9,Q9DC70,Q9CQZ6,Q9CPU2,Q91YT0,Q99LY9,Q9D6J5,Q9CQ54,Q8K3J1,Q3UIU2,Q9CQH3,Q91WD5,Q9DCT2,Q9DC69,Q62425,Q7TMF3,Q8BK30,P00158
167	mitochondrial envelope	GO:CC	1.89425e-14	Q9Z1P6,Q9DCJ5,Q91VD9,P99028,Q9CR62,Q9CQT9,Q9CQQ7,Q9CPQ8,Q99JR1,Q91V61,Q8VEM8,P63030,Q9CQZ5,Q9CQJ8,Q9CQC7,Q9DCC8,Q9D8W7,Q9CPP6,Q921G7,Q8CC21,Q9DCS9,Q9DC70,Q9CQZ6,Q9CPU2,Q91YT0,Q64521,Q99LY9,Q9D6J5,Q9CQ54,Q8K3J1,Q3UIU2,Q9CQH3,Q91WD5,Q61387,Q60931,Q9CPQ3,Q922Q1,Q791V5,Q78IK2,Q5U458,Q9DCT2,P41216,Q9DC69,Q8JZN5,Q62425,Q60930,Q8BW75,Q9DB41,Q9CZP5,Q8K1R3,P97478,Q9D880,P56135,Q7TMF3,Q8BK30,P00158,O88741,…
167	organelle membrane	GO:CC	2.21846e-14	Q9Z1P6,Q9DCJ5,Q91VD9,P99028,Q9CR62,Q9CQT9,Q9CQQ7,Q9CPQ8,Q99JR1,Q91V61,Q8VEM8,P63030,Q9CQZ5,Q9CQJ8,Q9CQC7,Q9DCC8,Q9D8W7,Q9CPP6,Q921G7,Q8CC21,Q9DCS9,Q9DC70,Q9CQZ6,Q9CPU2,Q91YT0,Q64521,Q99LY9,Q9D6J5,Q9CQ54,Q8K3J1,Q3UIU2,Q9CQH3,Q91WD5,Q61387,Q60931,Q9CPQ3,Q922Q1,Q791V5,Q78IK2,Q5U458,Q9DCT2,P41216,Q9DC69,Q8JZN5,Q62425,Q60930,Q8BW75,Q9DB41,Q9CZP5,Q8K1R3,P97478,Q9D880,P56135,Q7TMF3,Q8BK30,P00158,O88741,…
167	organelle envelope	GO:CC	4.31236e-14	Q9Z1P6,Q9DCJ5,Q91VD9,P99028,Q9CR62,Q9CQT9,Q9CQQ7,Q9CPQ8,Q99JR1,Q91V61,Q8VEM8,P63030,Q9CQZ5,Q9CQJ8,Q9CQC7,Q9DCC8,Q9D8W7,Q9CPP6,Q921G7,Q8CC21,Q9DCS9,Q9DC70,Q9CQZ6,Q9CPU2,Q91YT0,Q64521,Q99LY9,Q9D6J5,Q9CQ54,Q8K3J1,Q3UIU2,Q9CQH3,Q91WD5,Q61387,Q60931,Q9CPQ3,Q922Q1,Q791V5,Q78IK2,Q5U458,Q9DCT2,P41216,Q9DC69,Q8JZN5,Q62425,Q60930,Q8BW75,Q9DB41,Q9CZP5,Q8K1R3,P97478,Q9D880,P56135,Q7TMF3,Q8BK30,P00158,O88741,…
167	envelope	GO:CC	4.31236e-14	Q9Z1P6,Q9DCJ5,Q91VD9,P99028,Q9CR62,Q9CQT9,Q9CQQ7,Q9CPQ8,Q99JR1,Q91V61,Q8VEM8,P63030,Q9CQZ5,Q9CQJ8,Q9CQC7,Q9DCC8,Q9D8W7,Q9CPP6,Q921G7,Q8CC21,Q9DCS9,Q9DC70,Q9CQZ6,Q9CPU2,Q91YT0,Q64521,Q99LY9,Q9D6J5,Q9CQ54,Q8K3J1,Q3UIU2,Q9CQH3,Q91WD5,Q61387,Q60931,Q9CPQ3,Q922Q1,Q791V5,Q78IK2,Q5U458,Q9DCT2,P41216,Q9DC69,Q8JZN5,Q62425,Q60930,Q8BW75,Q9DB41,Q9CZP5,Q8K1R3,P97478,Q9D880,P56135,Q7TMF3,Q8BK30,P00158,O88741,…
167	integral component of membrane	GO:CC	4.68781e-14	Q9Z1P6,Q9DCJ5,Q91VD9,P99028,Q99JR1,Q91V61,Q8VEM8,P63030,Q9CQZ5,Q9CQJ8,Q9CQC7,Q9DCC8,Q9CPP6,Q921G7,Q9DCS9,Q9DC70,Q9CQZ6,Q9CPU2,Q91YT0,Q99LY9,Q9D6J5,Q9CQ54,Q8K3J1,Q3UIU2,Q9CQH3,Q91WD5,Q9CPQ3,Q5U458,Q9DCT2,Q9DC69,Q62425,P59017,Q7TMF3,Q8BK30,P00158,O88741,O35465
167	membrane	GO:CC	5.25928e-14	Q9Z1P6,Q9DCJ5,Q91VD9,P99028,Q9CR62,Q9CQT9,Q9CQQ7,Q9CPQ8,Q99JR1,Q91V61,Q8VEM8,P63030,Q9CQZ5,Q9CQJ8,Q9CQC7,Q9DCC8,Q9D8W7,Q9CPP6,Q921G7,Q8CC21,Q9DCS9,Q9DC70,Q9CQZ6,Q9CPU2,Q91YT0,Q64521,Q99LY9,Q91WC3,Q9D6J5,Q9CQ54,Q8K3J1,Q3UIU2,Q9CQH3,Q91WD5,Q61387,Q60931,Q9CPQ3,Q922Q1,Q791V5,Q78IK2,Q5U458,Q9DCT2,P41216,Q9DC69,Q8JZN5,Q62425,Q60930,Q8BW75,Q9DB41,Q9CZP5,Q8K1R3,P97478,Q9D880,P59017,P56135,Q7TMF3,Q8BK30,…
167	transporter complex	GO:CC	5.86963e-14	Q9Z1P6,Q9DCJ5,Q91VD9,P99028,Q9CQZ5,Q9CQJ8,Q9CQC7,Q9CPP6,Q9DCS9,Q9DC70,Q9CQZ6,Q9CPU2,Q91YT0,Q99LY9,Q9D6J5,Q9CQ54,Q8K3J1,Q3UIU2,Q9CQH3,Q91WD5,Q9DCT2,Q9DC69,Q62425,Q7TMF3,Q8BK30,P00158
167	intrinsic component of membrane	GO:CC	7.35773e-14	Q9Z1P6,Q9DCJ5,Q91VD9,P99028,Q99JR1,Q91V61,Q8VEM8,P63030,Q9CQZ5,Q9CQJ8,Q9CQC7,Q9DCC8,Q9CPP6,Q921G7,Q9DCS9,Q9DC70,Q9CQZ6,Q9CPU2,Q91YT0,Q99LY9,Q9D6J5,Q9CQ54,Q8K3J1,Q3UIU2,Q9CQH3,Q91WD5,Q9CPQ3,Q5U458,Q9DCT2,Q9DC69,Q62425,P59017,Q7TMF3,Q8BK30,P00158,O88741,O35465
167	oxidoreductase complex	GO:CC	1.24225e-13	Q9Z1P6,Q9DCJ5,Q91VD9,P99028,Q9CQZ5,Q9CQJ8,Q9CQC7,Q9CPP6,Q921G7,Q9DCS9,Q9DC70,Q9CQZ6,Q9CPU2,Q91YT0,Q64521,Q99LY9,Q9D6J5,Q9CQ54,Q8K3J1,Q3UIU2,Q9CQH3,Q91WD5,Q9DCT2,Q9DC69,Q62425,Q7TMF3,Q8BK30,P00158
167	respiratory chain complex	GO:CC	1.2858e-13	Q9Z1P6,Q9DCJ5,Q91VD9,P99028,Q9CQZ5,Q9CQJ8,Q9CQC7,Q9CPP6,Q9DCS9,Q9DC70,Q9CQZ6,Q9CPU2,Q91YT0,Q99LY9,Q9D6J5,Q9CQ54,Q8K3J1,Q3UIU2,Q9CQH3,Q91WD5,Q9DCT2,Q9DC69,Q62425,Q7TMF3,Q8BK30,P00158
167	inner mitochondrial membrane protein complex	GO:CC	2.36517e-13	Q9Z1P6,Q9DCJ5,Q91VD9,P99028,Q9CQQ7,Q9CPQ8,Q9CQZ5,Q9CQJ8,Q9CQC7,Q9CPP6,Q9DCS9,Q9DC70,Q9CQZ6,Q9CPU2,Q91YT0,Q99LY9,Q9D6J5,Q9CQ54,Q8K3J1,Q3UIU2,Q9CQH3,Q91WD5,Q78IK2,Q5U458,Q9DCT2,Q9DC69,Q62425,Q9D880,P56135,Q7TMF3,Q8BK30,P00158,O35129
167	mitochondrial membrane	GO:CC	3.52893e-13	Q9Z1P6,Q9DCJ5,Q91VD9,P99028,Q9CR62,Q9CQT9,Q9CQQ7,Q9CPQ8,Q99JR1,Q91V61,Q8VEM8,P63030,Q9CQZ5,Q9CQJ8,Q9CQC7,Q9DCC8,Q9D8W7,Q9CPP6,Q921G7,Q8CC21,Q9DCS9,Q9DC70,Q9CQZ6,Q9CPU2,Q91YT0,Q64521,Q99LY9,Q9D6J5,Q9CQ54,Q8K3J1,Q3UIU2,Q9CQH3,Q91WD5,Q61387,Q60931,Q9CPQ3,Q922Q1,Q791V5,Q78IK2,Q5U458,Q9DCT2,P41216,Q9DC69,Q8JZN5,Q62425,Q60930,Q8BW75,Q9DB41,Q9CZP5,P97478,Q9D880,P56135,Q7TMF3,Q8BK30,P00158,O88741,O35129,…
167	mitochondrial inner membrane	GO:CC	3.83268e-13	Q9Z1P6,Q9DCJ5,Q91VD9,P99028,Q9CR62,Q9CQT9,Q9CQQ7,Q9CPQ8,Q99JR1,Q91V61,Q8VEM8,P63030,Q9CQZ5,Q9CQJ8,Q9CQC7,Q9D8W7,Q9CPP6,Q921G7,Q8CC21,Q9DCS9,Q9DC70,Q9CQZ6,Q9CPU2,Q91YT0,Q64521,Q99LY9,Q9D6J5,Q9CQ54,Q8K3J1,Q3UIU2,Q9CQH3,Q91WD5,Q61387,Q60931,Q9CPQ3,Q922Q1,Q791V5,Q78IK2,Q5U458,Q9DCT2,Q9DC69,Q62425,Q60930,Q8BW75,Q9DB41,Q9CZP5,P97478,Q9D880,P56135,Q7TMF3,Q8BK30,P00158,O35129,A2APY7
167	organelle inner membrane	GO:CC	4.3596e-13	Q9Z1P6,Q9DCJ5,Q91VD9,P99028,Q9CR62,Q9CQT9,Q9CQQ7,Q9CPQ8,Q99JR1,Q91V61,Q8VEM8,P63030,Q9CQZ5,Q9CQJ8,Q9CQC7,Q9D8W7,Q9CPP6,Q921G7,Q8CC21,Q9DCS9,Q9DC70,Q9CQZ6,Q9CPU2,Q91YT0,Q64521,Q99LY9,Q9D6J5,Q9CQ54,Q8K3J1,Q3UIU2,Q9CQH3,Q91WD5,Q61387,Q60931,Q9CPQ3,Q922Q1,Q791V5,Q78IK2,Q5U458,Q9DCT2,Q9DC69,Q62425,Q60930,Q8BW75,Q9DB41,Q9CZP5,P97478,Q9D880,P56135,Q7TMF3,Q8BK30,P00158,O35129,A2APY7
167	membrane protein complex	GO:CC	5.59207e-12	Q9Z1P6,Q9DCJ5,Q91VD9,P99028,Q9CQQ7,Q9CPQ8,Q9CQZ5,Q9CQJ8,Q9CQC7,Q9DCC8,Q9CPP6,Q9DCS9,Q9DC70,Q9CQZ6,Q9CPU2,Q91YT0,Q99LY9,Q9D6J5,Q9CQ54,Q8K3J1,Q3UIU2,Q9CQH3,Q91WD5,Q9CPQ3,Q78IK2,Q5U458,Q9DCT2,Q9DC69,Q62425,Q9D880,P56135,Q7TMF3,Q8BK30,P00158,O35129
167	catalytic complex	GO:CC	1.10385e-07	Q9Z1P6,Q9DCJ5,Q91VD9,P99028,Q9CQZ5,Q9CQJ8,Q9CQC7,Q9CPP6,Q921G7,Q9DCS9,Q9DC70,Q9CQZ6,Q9CPU2,Q91YT0,Q64521,Q99LY9,Q9D6J5,Q9CQ54,Q8K3J1,Q3UIU2,Q9CQH3,Q91WD5,Q9DCT2,Q9DC69,Q62425,Q8K1R3,Q7TMF3,Q8BK30,P00158
167	mitochondrial protein-containing complex	GO:CC	8.63481e-07	Q9Z1P6,Q9DCJ5,Q91VD9,P99028,Q9CQQ7,Q9CPQ8,Q9CQZ5,Q9CQJ8,Q9CQC7,Q9DCC8,Q9CPP6,Q921G7,Q9DCS9,Q9DC70,Q9CQZ6,Q9CPU2,Q91YT0,Q99LY9,Q9D6J5,Q9CQ54,Q8K3J1,Q3UIU2,Q9CQH3,Q91WD5,Q9CPQ3,Q78IK2,Q5U458,Q9DCT2,Q9DC69,Q62425,Q8K1R3,Q9D880,P56135,Q7TMF3,Q8BK30,P00158,O35129
167	protein-containing complex	GO:CC	0.000307712	Q9Z1P6,Q9DCJ5,Q91VD9,P99028,Q9CQQ7,Q9CPQ8,Q9CQZ5,Q9CQJ8,Q9CQC7,Q9DCC8,Q9CPP6,Q921G7,Q9DCS9,Q9DC70,Q9CQZ6,Q9CPU2,Q91YT0,Q64521,Q99LY9,Q9D6J5,Q9CQ54,Q8K3J1,Q3UIU2,Q9CQH3,Q91WD5,Q9CPQ3,Q78IK2,Q5U458,Q9DCT2,Q9DC69,Q62425,Q8K1R3,P97478,Q9D880,P56135,Q7TMF3,Q8BK30,P00158,O35465,O70337,O35129
168	mitochondrial respiratory chain complex III	GO:CC	0.0149859	Q9DB77,Q8R1I1
168	respiratory chain complex III	GO:CC	0.0149859	Q9DB77,Q8R1I1
173	inner mitochondrial membrane protein complex	GO:CC	0.0305645	Q91WD5,Q9CPX8,P03930,Q9D880,O35129
182	membrane	GO:CC	0.0452459	Q9CQQ7,Q8VEM8,P50544,Q9CPP6,Q8CC21,Q9Z2I0,Q99LY9,Q91WS0,Q91WD5,Q8K2B3,Q9DCZ4,P51881,Q8JZN5,Q62425,P56382,Q8BW75,Q64133,Q9CZP5,Q8K1R3,P97478,P03930,P56135,Q80SW1,P05132,O88741,O35465
189	transmembrane transporter complex	GO:CC	0.000466109	Q8R1I1,P99028,Q9DCS9,Q9CPU2,O09111
189	transporter complex	GO:CC	0.000774656	Q8R1I1,P99028,Q9DCS9,Q9CPU2,O09111
189	respiratory chain complex	GO:CC	0.000887276	Q8R1I1,P99028,Q9DCS9,Q9CPU2,O09111
189	mitochondrial respirasome	GO:CC	0.000948233	Q8R1I1,P99028,Q9DCS9,Q9CPU2,O09111
189	respirasome	GO:CC	0.00108005	Q8R1I1,P99028,Q9DCS9,Q9CPU2,O09111
189	oxidoreductase complex	GO:CC	0.00208606	Q8R1I1,P99028,Q9DCS9,Q9CPU2,O09111
189	inner mitochondrial membrane protein complex	GO:CC	0.0144779	Q8R1I1,P99028,Q9DCS9,Q9CPU2,O09111
189	catalytic complex	GO:CC	0.0324274	Q8R1I1,P99028,Q9DCS9,Q9CPU2,O09111
189	integral component of membrane	GO:CC	0.040014	Q8R1I1,P99028,Q9DCS9,Q9CPU2,O09111
189	intrinsic component of membrane	GO:CC	0.0424152	Q8R1I1,P99028,Q9DCS9,Q9CPU2,O09111
189	membrane protein complex	GO:CC	0.0424152	Q8R1I1,P99028,Q9DCS9,Q9CPU2,O09111
1	active transmembrane transporter activity	GO:MF	0.0017147	Q9D6J6,Q91VD9,Q9CR62,Q9CPQ8,Q8VEM8,Q8BH59,Q9DCC8,Q9CQ75,Q9DC70,Q8K3J1,Q91WD5,Q9DCT2,P56382,Q9DB41,Q9D6M3
1	NADH dehydrogenase activity	GO:MF	0.0040228	Q9D6J6,Q91VD9,Q9CQ75,Q9DC70,Q8K3J1,Q91WD5,Q9DCT2,Q9DC69
1	NADH dehydrogenase (ubiquinone) activity	GO:MF	0.0262091	Q9D6J6,Q91VD9,Q9CQ75,Q9DC70,Q8K3J1,Q91WD5,Q9DCT2
1	NADH dehydrogenase (quinone) activity	GO:MF	0.0262091	Q9D6J6,Q91VD9,Q9CQ75,Q9DC70,Q8K3J1,Q91WD5,Q9DCT2
1	transmembrane transporter activity	GO:MF	0.0498546	Q9D6J6,Q91VD9,Q9CR62,Q9CQQ7,Q9CPQ8,Q99JR1,Q91V61,Q8VEM8,Q8BH59,P63030,Q9DCC8,Q9CQ75,Q9DC70,Q8K3J1,Q91WD5,Q9DCT2,Q9CQ85,P56382,Q9DB41,P56135,Q9D6M3
3	inorganic molecular entity transmembrane transporter activity	GO:MF	0.012694	Q9CR62,Q9CQQ7,Q9CPQ8,Q8VEM8,Q8BH59,Q60931,P56382,Q9DB41,P03930,P56135,Q9D6M3
3	transmembrane transporter activity	GO:MF	0.0300917	Q9CR62,Q9CQQ7,Q9CPQ8,Q8VEM8,Q8BH59,P63030,Q9DCC8,Q8K3J1,Q91WD5,Q60931,Q9CPQ3,Q9DCT2,Q9CQ85,P56382,Q9DB41,P03930,P56135,Q9D6M3
3	proton transmembrane transporter activity	GO:MF	0.0425246	Q9CQQ7,Q9CPQ8,Q8BH59,P56382,Q9DB41,P03930,P56135,Q9D6M3
8	NADH dehydrogenase (ubiquinone) activity	GO:MF	0.0135401	Q91VD9,P03911,Q8K3J1,Q9DCT2
8	NADH dehydrogenase (quinone) activity	GO:MF	0.0135401	Q91VD9,P03911,Q8K3J1,Q9DCT2
8	NADH dehydrogenase activity	GO:MF	0.0177759	Q91VD9,P03911,Q8K3J1,Q9DCT2
8	NAD(P)H dehydrogenase (quinone) activity	GO:MF	0.0228881	Q91VD9,P03911,Q8K3J1,Q9DCT2
9	proton channel activity	GO:MF	2.80461e-06	Q91VR2,Q9CQQ7,Q9CPQ8,Q06185
9	proton-transporting ATP synthase activity, rotational mechanism	GO:MF	2.80461e-06	Q91VR2,Q9CQQ7,Q9CPQ8,Q06185
9	cation channel activity	GO:MF	6.65358e-06	Q91VR2,Q9CQQ7,Q9CPQ8,Q06185
9	ion channel activity	GO:MF	1.35148e-05	Q91VR2,Q9CQQ7,Q9CPQ8,Q06185
9	channel activity	GO:MF	3.51557e-05	Q91VR2,Q9CQQ7,Q9CPQ8,Q06185
9	passive transmembrane transporter activity	GO:MF	3.51557e-05	Q91VR2,Q9CQQ7,Q9CPQ8,Q06185
9	proton transmembrane transporter activity	GO:MF	4.87009e-05	Q91VR2,Q9CQQ7,Q9CPQ8,Q06185
9	inorganic cation transmembrane transporter activity	GO:MF	0.000162366	Q91VR2,Q9CQQ7,Q9CPQ8,Q06185
9	inorganic molecular entity transmembrane transporter activity	GO:MF	0.000371943	Q91VR2,Q9CQQ7,Q9CPQ8,Q06185
9	cation transmembrane transporter activity	GO:MF	0.000487597	Q91VR2,Q9CQQ7,Q9CPQ8,Q06185
9	ligase activity	GO:MF	0.00141152	Q91VR2,Q9CQQ7,Q9CPQ8,Q06185
9	ion transmembrane transporter activity	GO:MF	0.00194197	Q91VR2,Q9CQQ7,Q9CPQ8,Q06185
9	transmembrane transporter activity	GO:MF	0.0167245	Q91VR2,Q9CQQ7,Q9CPQ8,Q06185
9	transporter activity	GO:MF	0.0233942	Q91VR2,Q9CQQ7,Q9CPQ8,Q06185
26	O-acyltransferase activity	GO:MF	0.0200525	P52825,Q14DK4
28	cytochrome-c oxidase activity	GO:MF	0.0391734	P00405,P12787
28	oxidoreductase activity, acting on a heme group of donors	GO:MF	0.0391734	P00405,P12787
30	cytochrome-c oxidase activity	GO:MF	0.00776942	P00405,P12787
30	oxidoreductase activity, acting on a heme group of donors	GO:MF	0.00776942	P00405,P12787
44	succinate dehydrogenase activity	GO:MF	0.011428	Q9CQA3,Q8K2B3
44	succinate dehydrogenase (ubiquinone) activity	GO:MF	0.011428	Q9CQA3,Q8K2B3
44	oxidoreductase activity, acting on the CH-CH group of donors, quinone or related compound as acceptor	GO:MF	0.0227587	Q9CQA3,Q8K2B3
45	proton-transporting ATP synthase activity, rotational mechanism	GO:MF	8.47582e-07	Q03265,Q9DB20,P03930,P97450
45	proton channel activity	GO:MF	8.47582e-07	Q03265,Q9DB20,P03930,P97450
45	cation channel activity	GO:MF	2.01523e-06	Q03265,Q9DB20,P03930,P97450
45	ion channel activity	GO:MF	4.10243e-06	Q03265,Q9DB20,P03930,P97450
45	passive transmembrane transporter activity	GO:MF	1.07112e-05	Q03265,Q9DB20,P03930,P97450
45	channel activity	GO:MF	1.07112e-05	Q03265,Q9DB20,P03930,P97450
45	proton transmembrane transporter activity	GO:MF	1.48602e-05	Q03265,Q9DB20,P03930,P97450
45	inorganic cation transmembrane transporter activity	GO:MF	4.9877e-05	Q03265,Q9DB20,P03930,P97450
45	inorganic molecular entity transmembrane transporter activity	GO:MF	0.000114945	Q03265,Q9DB20,P03930,P97450
45	cation transmembrane transporter activity	GO:MF	0.000151028	Q03265,Q9DB20,P03930,P97450
45	ligase activity	GO:MF	0.000441873	Q03265,Q9DB20,P03930,P97450
45	ion transmembrane transporter activity	GO:MF	0.000610259	Q03265,Q9DB20,P03930,P97450
45	ATP hydrolysis activity	GO:MF	0.00104467	Q03265,Q9DB20,P97450
45	transmembrane transporter activity	GO:MF	0.00545191	Q03265,Q9DB20,P03930,P97450
45	ribonucleoside triphosphate phosphatase activity	GO:MF	0.00593536	Q03265,Q9DB20,P97450
45	transporter activity	GO:MF	0.0076872	Q03265,Q9DB20,P03930,P97450
45	ATP-dependent activity	GO:MF	0.0111288	Q03265,Q9DB20,P97450
45	pyrophosphatase activity	GO:MF	0.0119347	Q03265,Q9DB20,P97450
45	hydrolase activity, acting on acid anhydrides	GO:MF	0.0119347	Q03265,Q9DB20,P97450
45	hydrolase activity, acting on acid anhydrides, in phosphorus-containing anhydrides	GO:MF	0.0119347	Q03265,Q9DB20,P97450
49	protein C-terminus binding	GO:MF	0.00178999	P67778,O35129
52	binding	GO:MF	0.00689488	Q9D6R2,Q9CQA3,Q9DCC8,Q8CC21,Q91YT0,Q8BMF4,Q3UV70,Q91WS0,Q91WC3,Q8K3J1,Q91WD5,Q60931,Q922Q1,Q9DCT2,Q9DC69,Q8JZN5,Q8CGK3,Q62425,Q4VAE3,P56382,Q91WK5,Q8BW75,Q64133,Q8R086,Q8K1R3,P97478,Q9D880,Q8R0Y6,Q8K1Z0,Q8VCX5,Q80SW1,Q8C5H8,P19096,Q8C167,P36552,O35465,D3Z7P3,O70337,O35129
52	protein binding	GO:MF	0.0225827	Q9DCC8,Q8CC21,Q91YT0,Q8BMF4,Q91WS0,Q91WC3,Q8K3J1,Q91WD5,Q60931,Q9DCT2,Q9DC69,Q8CGK3,Q62425,Q4VAE3,Q91WK5,Q8BW75,Q64133,Q9D880,Q8R0Y6,Q8K1Z0,Q8VCX5,Q80SW1,Q8C5H8,P19096,Q8C167,P36552,O35465,D3Z7P3,O70337,O35129
57	oxidoreductase activity, acting on the aldehyde or oxo group of donors, NAD or NADP as acceptor	GO:MF	0.00538367	Q8BMF4,Q60597,P35486
57	oxidoreductase activity, acting on the aldehyde or oxo group of donors	GO:MF	0.00704629	Q8BMF4,Q60597,P35486
57	pyruvate dehydrogenase activity	GO:MF	0.0147989	Q8BMF4,P35486
57	oxidoreductase activity, acting on the aldehyde or oxo group of donors, disulfide as acceptor	GO:MF	0.0147989	Q60597,P35486
57	pyruvate dehydrogenase [NAD(P)+] activity	GO:MF	0.0147989	Q8BMF4,P35486
57	pyruvate dehydrogenase (NAD+) activity	GO:MF	0.0147989	Q8BMF4,P35486
65	oxidoreductase activity, acting on the CH-OH group of donors, NAD or NADP as acceptor	GO:MF	0.00123549	Q8K354,P51660,Q99KE1,Q99L13
65	oxidoreductase activity, acting on CH-OH group of donors	GO:MF	0.00216678	Q8K354,P51660,Q99KE1,Q99L13
82	active transmembrane transporter activity	GO:MF	0.0281313	Q9CPQ8,Q8BH59,Q9DCC8,Q9CQ75,Q8K3J1,Q91WD5,Q9DCT2,Q99LC3,Q9DB41,Q9D6M3
82	amino acid transmembrane transporter activity	GO:MF	0.0367078	Q99JR1,Q91V61,Q8BH59,Q9DB41,Q9D6M3
83	NADH dehydrogenase (quinone) activity	GO:MF	0.0409226	Q8K3J1,Q91WD5,Q9DCT2,Q99LC3
83	NADH dehydrogenase (ubiquinone) activity	GO:MF	0.0409226	Q8K3J1,Q91WD5,Q9DCT2,Q99LC3
86	NADH dehydrogenase (ubiquinone) activity	GO:MF	0.0258	Q8K3J1,Q91WD5,Q9DCT2,Q99LC3
86	NADH dehydrogenase (quinone) activity	GO:MF	0.0258	Q8K3J1,Q91WD5,Q9DCT2,Q99LC3
[truncated: 357 more rows]
